# Supplementary material
Source: publisher figshare collection journal article supplement (https://gsajournals.figshare.com/ndownloader/files/21928245)
Supplement: Supplementary file 1 [file 21928245]

## Sheet: table S1
Table S1 Overall Details of Individual Pigs
Breeds	ID	Mapped read depth	Re-sequencing
Meishan	3	7.36224	Yes
Meishan	5	6.95773	Yes
Meishan	7	7.86825	Yes
Meishan	8	8.03389	Yes
Meishan	9	8.35433	Yes
Meishan	10	8.90137	Yes
Meishan	11	7.86816	Yes
Meishan	12	8.22206	Yes
Meishan	13	8.58363	Yes
Meishan	15	9.12509	Yes
Meishan	16	8.19667	Yes
Meishan	17	9.57403	Yes
Meishan	19	6.82022	Yes
Meishan	21	7.86999	Yes
Meishan	22	7.42192	Yes
Meishan	23	7.34403	Yes
Meishan	24	7.8291	Yes
Meishan	25	7.9235	Yes
Meishan	27	8.69338	Yes
Meishan	28	8.43178	Yes
Meishan	29	8.37399	Yes
Meishan	30	6.94762	Yes
Meishan	31	8.23039	Yes
Meishan	32	7.61108	Yes
Meishan	34	8.78819	Yes
Meishan	36	6.07817	Yes
Meishan	37	8.14389	Yes
Meishan	38	7.65044	Yes
Meishan	39	9.35223	Yes
Meishan	43	7.89312	Yes
Meishan	110	10.29	Yes
Meishan	111	10.96	Yes
Durocs	1	7.89904	Yes
Durocs	2	7.59816	Yes
Durocs	4	7.51802	Yes
Durocs	6	7.43036	Yes
Durocs	14	8.18966	Yes
Durocs	18	7.95345	Yes
Durocs	20	8.46245	Yes
Durocs	26	8.30133	Yes
Durocs	33	7.74387	Yes
Durocs	35	10.0449	Yes
Durocs	40	8.44507	Yes
Durocs	41	7.85851	Yes
Durocs	42	7.0999	Yes
Durocs	44	7.30849	Yes
Durocs	45	7.52743	Yes
Durocs	46	8.35114	Yes
Durocs	47	9.42245	Yes
Durocs	48	7.24456	Yes
Durocs	49	9.39103	Yes
Durocs	50	10.2074	Yes
Durocs	51	9.0926	Yes
Durocs	52	8.29322	Yes
Durocs	53	9.55967	Yes
Durocs	54	8.94528	Yes
Durocs	55	6.99945	Yes
Durocs	56	7.52474	Yes
Durocs	57	7.69304	Yes
Durocs	58	6.8376	Yes
Durocs	59	8.21266	Yes
Durocs	60	8.08352	Yes
Durocs	100	5.24216	Download
Durocs	101	6.10984	Download
Durocs	102	3.99556	Download
Durocs	103	5.05396	Download
Durocs	115	9.83	Yes

## Sheet: table S2
Table S2 Potential Candidate Regions Detected by di
Chr	Start	End	di
16	69600000	69700000	6.67154
18	33000000	33100000	5.85802
15	24000000	24100000	5.49924
14	9100000	9200000	5.47267
1	129900000	130000000	5.45986
5	46100000	46200000	5.43249
15	105200000	105300000	4.87719
1	235600000	235700000	4.77334
3	43500000	43600000	4.64538
3	41800000	41900000	4.40037
3	42700000	42800000	4.39989
3	43400000	43500000	4.39935
3	42400000	42500000	4.36386
3	43300000	43400000	4.35335
2	57000000	57100000	4.18551
1	148400000	148500000	4.14216
13	36900000	37000000	4.13717
1	148500000	148600000	4.10135
3	40600000	40700000	4.09927
3	42600000	42700000	4.07586
1	236100000	236200000	4.01076
3	43200000	43300000	4.00759
3	42300000	42400000	3.97492
6	300000	400000	3.89236
1	153700000	153800000	3.8711
13	127800000	127900000	3.83896
13	117800000	117900000	3.80233
3	75800000	75900000	3.78907
9	78000000	78100000	3.78837
3	42200000	42300000	3.78057
9	110100000	110200000	3.74697
4	90300000	90400000	3.74659
3	42800000	42900000	3.72807
3	40500000	40600000	3.69757
13	146300000	146400000	3.67432
13	146500000	146600000	3.66675
5	32400000	32500000	3.62705
2	59300000	59400000	3.60671
3	41900000	42000000	3.59687
13	127700000	127800000	3.58872
13	184600000	184700000	3.52872
3	54500000	54600000	3.51591
13	127900000	128000000	3.51011
1	148300000	148400000	3.50824
3	40900000	41000000	3.49446
1	186900000	187000000	3.48033
1	236500000	236600000	3.46301
1	148600000	148700000	3.45905
16	42700000	42800000	3.45861
3	42000000	42100000	3.4578
1	149400000	149500000	3.36906
5	32600000	32700000	3.3514
3	40400000	40500000	3.3502
13	105000000	105100000	3.33488
1	153500000	153600000	3.33131
6	75200000	75300000	3.32837
9	63900000	64000000	3.30479
3	43600000	43700000	3.30063
14	27700000	27800000	3.29631
1	151800000	151900000	3.28052
2	73700000	73800000	3.27944
7	66600000	66700000	3.27005
1	153400000	153500000	3.25921
3	41000000	41100000	3.25726
7	65400000	65500000	3.2374
5	32500000	32600000	3.23558
1	153100000	153200000	3.23365
13	153000000	153100000	3.21643
7	63900000	64000000	3.20486
2	83100000	83200000	3.20068
6	34100000	34200000	3.19125
2	20100000	20200000	3.1901
7	65300000	65400000	3.1814
15	147200000	147300000	3.17604
1	101200000	101300000	3.14612
4	50100000	50200000	3.13416
1	75800000	75900000	3.13083
6	66200000	66300000	3.12189
1	144000000	144100000	3.10791
3	74700000	74800000	3.09438
1	307700000	307800000	3.04087
13	113000000	113100000	3.03513
2	57300000	57400000	3.0254
5	59400000	59500000	3.02158
1	286300000	286400000	3.02026
3	38800000	38900000	2.99785
3	41200000	41300000	2.99532
17	38800000	38900000	2.98174
16	45800000	45900000	2.97564
13	36100000	36200000	2.97455
15	104600000	104700000	2.9744
7	100000	200000	2.95891
7	65100000	65200000	2.93418
13	185100000	185200000	2.93352
1	148100000	148200000	2.92938
1	159600000	159700000	2.92882
3	41400000	41500000	2.92641
9	64600000	64700000	2.91689
17	53000000	53100000	2.90547
7	61200000	61300000	2.89442
3	41100000	41200000	2.86074
5	32700000	32800000	2.85538
1	148700000	148800000	2.85401
7	61800000	61900000	2.83885
1	153600000	153700000	2.83703
6	82600000	82700000	2.8327
7	300000	400000	2.82238
1	164800000	164900000	2.81653
5	56300000	56400000	2.81438
3	39200000	39300000	2.81113
2	58700000	58800000	2.80734
3	41700000	41800000	2.79797
1	178800000	178900000	2.77822
16	53100000	53200000	2.77629
16	52500000	52600000	2.76398
1	153900000	154000000	2.75772
1	148800000	148900000	2.75126
7	64200000	64300000	2.74241
1	153800000	153900000	2.7374
3	61100000	61200000	2.7338
1	71000000	71100000	2.73361
13	114900000	115000000	2.72974
2	74000000	74100000	2.70862
15	105400000	105500000	2.70143
2	72200000	72300000	2.69452
6	140800000	140900000	2.67885
6	98600000	98700000	2.67883
8	39700000	39800000	2.67527
3	41600000	41700000	2.67425
2	74300000	74400000	2.67251
1	185300000	185400000	2.66968
9	63400000	63500000	2.66783
1	159400000	159500000	2.6634
1	78900000	79000000	2.66306
15	104700000	104800000	2.65968
17	58100000	58200000	2.65484
5	42700000	42800000	2.61646
9	88300000	88400000	2.61569
13	107800000	107900000	2.61166
2	76100000	76200000	2.60763
8	62200000	62300000	2.60439
3	7800000	7900000	2.60318
15	146300000	146400000	2.60312
13	152800000	152900000	2.60149
8	43300000	43400000	2.5925
13	174100000	174200000	2.58817
9	53700000	53800000	2.5806
9	76900000	77000000	2.57635
1	148200000	148300000	2.57451
6	38800000	38900000	2.57315
3	43700000	43800000	2.56916
15	114700000	114800000	2.56536
3	38200000	38300000	2.55772
3	61300000	61400000	2.54962
8	46200000	46300000	2.54568
3	41300000	41400000	2.52598
1	117600000	117700000	2.52312
12	21000000	21100000	2.52192
2	78300000	78400000	2.52153
3	43000000	43100000	2.52031
9	63300000	63400000	2.52009
7	200000	300000	2.52
13	62100000	62200000	2.51832
1	54400000	54500000	2.51406
1	65500000	65600000	2.51234
1	70200000	70300000	2.51188
13	35800000	35900000	2.5099
3	42500000	42600000	2.50664
1	189600000	189700000	2.50376
1	70900000	71000000	2.50088
1	82500000	82600000	2.50061
13	117600000	117700000	2.50014
9	149900000	150000000	2.49803
3	38600000	38700000	2.48776
7	102900000	103000000	2.48769
17	38700000	38800000	2.48483
6	33000000	33100000	2.48217
13	115000000	115100000	2.4813
1	144300000	144400000	2.48017
1	150300000	150400000	2.47698
5	50400000	50500000	2.47651
2	34000000	34100000	2.47252
14	9200000	9300000	2.4725
3	38300000	38400000	2.47089
13	124600000	124700000	2.46634
1	16800000	16900000	2.46154
9	78900000	79000000	2.45452
9	64700000	64800000	2.44857
6	34000000	34100000	2.44674
13	164100000	164200000	2.44113
9	63700000	63800000	2.44059
4	91800000	91900000	2.44058
15	147100000	147200000	2.43362
1	234700000	234800000	2.43219
1	147400000	147500000	2.43194
5	53200000	53300000	2.43085
1	166000000	166100000	2.42346
13	116300000	116400000	2.42294
9	64200000	64300000	2.42028
13	175200000	175300000	2.41902
15	26300000	26400000	2.41697
9	64100000	64200000	2.40049
5	17900000	18000000	2.39701
1	224800000	224900000	2.39273
15	104500000	104600000	2.38999
1	165800000	165900000	2.38983
2	65800000	65900000	2.38739
6	132600000	132700000	2.38654
3	114800000	114900000	2.38623
13	123100000	123200000	2.3854
2	147000000	147100000	2.36752
13	38900000	39000000	2.36544
13	35900000	36000000	2.36271
9	62900000	63000000	2.36009
13	107600000	107700000	2.35684
1	153000000	153100000	2.35643
13	115500000	115600000	2.35433
7	61700000	61800000	2.35091
1	236200000	236300000	2.34927
9	77000000	77100000	2.34881
8	43000000	43100000	2.34316
13	128100000	128200000	2.34267
3	43100000	43200000	2.34203
9	149800000	149900000	2.34037
2	61900000	62000000	2.33939
13	127600000	127700000	2.33871
13	184700000	184800000	2.33845
1	110500000	110600000	2.32703
18	5500000	5600000	2.32686
18	51200000	51300000	2.32661
13	152300000	152400000	2.32208
6	86600000	86700000	2.31523
1	63200000	63300000	2.31349
15	138200000	138300000	2.31337
13	36000000	36100000	2.31179
1	149000000	149100000	2.30569
1	148900000	149000000	2.30537
6	84000000	84100000	2.30504
2	34100000	34200000	2.30411
13	85800000	85900000	2.30321
7	63600000	63700000	2.30141
3	54100000	54200000	2.28792
15	82900000	83000000	2.28737
1	86500000	86600000	2.28493
2	76200000	76300000	2.28287
9	79000000	79100000	2.28088
18	58200000	58300000	2.27922
6	82700000	82800000	2.27314
3	23500000	23600000	2.27197
6	70800000	70900000	2.26969
15	105700000	105800000	2.26862
1	158300000	158400000	2.2657
10	100000	200000	2.26433
1	310200000	310300000	2.26382
7	63500000	63600000	2.26291
3	17800000	17900000	2.25962
3	84700000	84800000	2.24708
1	153200000	153300000	2.24505
2	83800000	83900000	2.24129
3	38400000	38500000	2.2409
2	57800000	57900000	2.23477
3	23600000	23700000	2.23031
7	102200000	102300000	2.22948
16	58400000	58500000	2.22545
2	55900000	56000000	2.22515
9	79400000	79500000	2.22423
3	44100000	44200000	2.22101
9	78700000	78800000	2.2163
7	64100000	64200000	2.2121
16	0	100000	2.21141
13	105700000	105800000	2.21017
2	58600000	58700000	2.20628
7	80300000	80400000	2.20233
1	158200000	158300000	2.19958
3	50000000	50100000	2.19749
13	76100000	76200000	2.19685
1	53200000	53300000	2.19509
1	79000000	79100000	2.1939
12	20900000	21000000	2.19354
18	1400000	1500000	2.19256
7	109500000	109600000	2.19242
7	62000000	62100000	2.18981
3	53100000	53200000	2.18877
15	105500000	105600000	2.1859
13	41500000	41600000	2.18447
9	89000000	89100000	2.18435
5	56900000	57000000	2.1802
1	165900000	166000000	2.17845
2	77800000	77900000	2.17274
9	88200000	88300000	2.17254
14	34100000	34200000	2.17175
6	400000	500000	2.17153
13	104900000	105000000	2.17145
3	41500000	41600000	2.17136
3	55500000	55600000	2.16753
1	165700000	165800000	2.16506
3	52700000	52800000	2.16503
1	207300000	207400000	2.16367
9	74800000	74900000	2.16197
8	43500000	43600000	2.16171
15	119000000	119100000	2.15923
14	138800000	138900000	2.15611
2	56600000	56700000	2.15381
8	43600000	43700000	2.15275
13	89600000	89700000	2.15176
13	137900000	138000000	2.15128
3	60800000	60900000	2.15034
3	48900000	49000000	2.14971
6	79000000	79100000	2.1464
2	78400000	78500000	2.14059
7	0	100000	2.13023
2	39000000	39100000	2.1294
6	115100000	115200000	2.12906
5	77400000	77500000	2.12475
7	60700000	60800000	2.12473
13	131900000	132000000	2.12247
6	32800000	32900000	2.1217
2	57100000	57200000	2.11417
1	82000000	82100000	2.10478
8	45500000	45600000	2.10273
16	58500000	58600000	2.10024
1	151300000	151400000	2.09895
1	186800000	186900000	2.09835
13	36800000	36900000	2.09709
7	126800000	126900000	2.09493
2	82200000	82300000	2.09405
3	57300000	57400000	2.09096
3	57400000	57500000	2.08832
13	35000000	35100000	2.08688
7	64000000	64100000	2.08577
8	45600000	45700000	2.08119
3	55700000	55800000	2.08012
3	52200000	52300000	2.07977
7	78800000	78900000	2.07637
15	82800000	82900000	2.07538
16	49500000	49600000	2.07197
8	144800000	144900000	2.07113
3	61000000	61100000	2.0675
15	88600000	88700000	2.06374
1	72500000	72600000	2.05804
1	16600000	16700000	2.05801
7	78700000	78800000	2.05581
1	70400000	70500000	2.05354
5	33300000	33400000	2.05328
18	1300000	1400000	2.05248
2	72300000	72400000	2.05205
2	80500000	80600000	2.04887
1	68500000	68600000	2.04753
3	43800000	43900000	2.04596
3	61200000	61300000	2.04262
3	54600000	54700000	2.04007
13	107700000	107800000	2.0394
5	7700000	7800000	2.03869
8	45700000	45800000	2.03826
12	56200000	56300000	2.03807
3	54700000	54800000	2.0372
2	56100000	56200000	2.03643
13	142900000	143000000	2.03629
5	45200000	45300000	2.03256
6	142700000	142800000	2.03089
13	128200000	128300000	2.02708
6	31700000	31800000	2.02687
9	66300000	66400000	2.0264
2	61800000	61900000	2.02254
13	169100000	169200000	2.02126
5	55300000	55400000	2.02104
4	6800000	6900000	2.01908
2	56000000	56100000	2.01642
2	89600000	89700000	2.01312
13	105100000	105200000	2.00894
16	49600000	49700000	2.00818
10	44100000	44200000	2.00809
5	60100000	60200000	2.00789
15	153300000	153400000	2.00749
14	2500000	2600000	2.00672
2	71300000	71400000	2.0054
5	57800000	57900000	2.00401
2	59200000	59300000	2.00399
9	150000000	150100000	2.00208
13	110700000	110800000	1.99893
3	39100000	39200000	1.99854
1	234000000	234100000	1.99668
16	54400000	54500000	1.99297
16	54900000	55000000	1.99084
13	152700000	152800000	1.98897
6	84800000	84900000	1.98852
3	42100000	42200000	1.98719
2	58200000	58300000	1.9864
5	13100000	13200000	1.98638
1	73600000	73700000	1.98628
1	51600000	51700000	1.98401
7	88800000	88900000	1.98093
2	77500000	77600000	1.98062
7	126700000	126800000	1.97985
14	132300000	132400000	1.97814
16	42800000	42900000	1.97558
15	83100000	83200000	1.96879
1	151700000	151800000	1.96744
5	55000000	55100000	1.96559
1	117700000	117800000	1.96485
1	119200000	119300000	1.96421
2	56900000	57000000	1.96387
15	77300000	77400000	1.9634
9	44200000	44300000	1.96021
6	77300000	77400000	1.95981
9	79900000	80000000	1.95593
5	58300000	58400000	1.95374
3	40000000	40100000	1.95003
2	58500000	58600000	1.94899
9	58100000	58200000	1.94749
12	20800000	20900000	1.94651
13	128000000	128100000	1.94616
9	44300000	44400000	1.94582
14	86800000	86900000	1.94474
5	23400000	23500000	1.94424
1	235300000	235400000	1.94185
1	178600000	178700000	1.94009
8	49500000	49600000	1.93998
7	101700000	101800000	1.93798
2	76000000	76100000	1.93573
1	223100000	223200000	1.93553
13	137600000	137700000	1.93523
3	106600000	106700000	1.93496
3	74600000	74700000	1.9336
1	65400000	65500000	1.93315
1	207600000	207700000	1.93173
8	144600000	144700000	1.93027
18	41400000	41500000	1.92834
1	264100000	264200000	1.92707
2	65200000	65300000	1.92674
6	67800000	67900000	1.9262
13	88600000	88700000	1.92546
9	143400000	143500000	1.91429
15	76800000	76900000	1.91428
9	62800000	62900000	1.91409
1	261800000	261900000	1.91393
13	36600000	36700000	1.91174
9	88500000	88600000	1.91065
3	25900000	26000000	1.91048
16	69700000	69800000	1.90855
6	111900000	112000000	1.90786
1	46700000	46800000	1.90563
8	40300000	40400000	1.90325
17	57900000	58000000	1.9012
1	158500000	158600000	1.90023
1	180800000	180900000	1.89974
14	152600000	152700000	1.89862
5	54600000	54700000	1.89668
1	117800000	117900000	1.89618
9	60900000	61000000	1.89481
7	64300000	64400000	1.89355
4	83100000	83200000	1.89337
3	38500000	38600000	1.89298
1	72900000	73000000	1.89234
14	51000000	51100000	1.89211
8	123100000	123200000	1.89176
6	80300000	80400000	1.89053
14	138700000	138800000	1.89034
1	187200000	187300000	1.8896
3	51700000	51800000	1.88525
9	81300000	81400000	1.88447
5	33200000	33300000	1.88304
3	74800000	74900000	1.88199
3	57100000	57200000	1.87982
16	58200000	58300000	1.8796
3	86100000	86200000	1.87912
9	129900000	130000000	1.87901
4	83300000	83400000	1.87569
9	149300000	149400000	1.87359
5	41700000	41800000	1.873
9	100200000	100300000	1.87094
13	151800000	151900000	1.87035
15	66900000	67000000	1.86879
13	95500000	95600000	1.86839
3	57600000	57700000	1.86628
6	101800000	101900000	1.86601
6	114000000	114100000	1.86591
3	54400000	54500000	1.86502
7	65200000	65300000	1.86389
2	79700000	79800000	1.85877
6	80400000	80500000	1.85695
1	62000000	62100000	1.85692
5	58000000	58100000	1.85608
2	57500000	57600000	1.85561
3	53800000	53900000	1.8538
12	50000000	50100000	1.85263
13	151900000	152000000	1.85213
3	26000000	26100000	1.85213
16	45900000	46000000	1.85198
2	61600000	61700000	1.85174
13	131300000	131400000	1.84954
5	57900000	58000000	1.84915
2	72700000	72800000	1.8463
15	78300000	78400000	1.84506
7	35200000	35300000	1.84136
1	51500000	51600000	1.84096
13	133300000	133400000	1.83942
3	39000000	39100000	1.83795
18	51300000	51400000	1.83772
5	45000000	45100000	1.83475
8	137900000	138000000	1.83418
1	88900000	89000000	1.8338
5	77300000	77400000	1.83343
1	74400000	74500000	1.8333
2	61400000	61500000	1.83227
3	84800000	84900000	1.83225
13	115900000	116000000	1.8303
8	144900000	145000000	1.82991
3	71300000	71400000	1.82458
1	110700000	110800000	1.82434
13	132000000	132100000	1.82276
15	67000000	67100000	1.82223
13	88700000	88800000	1.82097
16	52900000	53000000	1.82088
1	152600000	152700000	1.82042
14	27800000	27900000	1.82001
3	61600000	61700000	1.81885
1	78400000	78500000	1.81797
16	50100000	50200000	1.81683
6	134900000	135000000	1.81668
13	107500000	107600000	1.81665
1	260800000	260900000	1.81465
1	158100000	158200000	1.81382
1	110400000	110500000	1.81284
1	149500000	149600000	1.81214
3	51800000	51900000	1.81086
14	61700000	61800000	1.80992
1	206900000	207000000	1.80944
7	103400000	103500000	1.80898
9	88000000	88100000	1.80068
2	67700000	67800000	1.80047
1	149900000	150000000	1.79953
6	114100000	114200000	1.79732
13	146200000	146300000	1.79732
10	71700000	71800000	1.79387
2	80300000	80400000	1.79281
7	29300000	29400000	1.7925
15	82500000	82600000	1.79231
3	142200000	142300000	1.7916
13	92900000	93000000	1.79123
3	57200000	57300000	1.79033
2	67600000	67700000	1.78675
1	170700000	170800000	1.7846
1	164500000	164600000	1.78447
6	600000	700000	1.78253
13	33000000	33100000	1.78168
16	54200000	54300000	1.78146
9	78100000	78200000	1.78099
15	77800000	77900000	1.77921
5	41800000	41900000	1.7787
5	3900000	4000000	1.77838
1	51800000	51900000	1.77837
6	2900000	3000000	1.77802
5	42800000	42900000	1.77775
9	83600000	83700000	1.77641
1	118000000	118100000	1.77617
1	78500000	78600000	1.77394
5	27500000	27600000	1.77387
13	42000000	42100000	1.77373
3	49700000	49800000	1.77314
2	85000000	85100000	1.77236
4	75800000	75900000	1.76984
13	143600000	143700000	1.76917
1	136800000	136900000	1.76862
8	78600000	78700000	1.76781
6	77200000	77300000	1.76714
3	57700000	57800000	1.7653
13	115100000	115200000	1.76466
13	184900000	185000000	1.76201
2	79800000	79900000	1.76129
1	237600000	237700000	1.76055
13	123400000	123500000	1.7575
1	266900000	267000000	1.75616
9	75500000	75600000	1.75514
9	64000000	64100000	1.75469
13	142000000	142100000	1.75442
1	111200000	111300000	1.75438
1	74800000	74900000	1.7542
1	49600000	49700000	1.75318
18	22800000	22900000	1.75089
1	251900000	252000000	1.75078
4	75700000	75800000	1.75006
13	163000000	163100000	1.74957
18	15200000	15300000	1.74925
3	50300000	50400000	1.74808
3	40200000	40300000	1.74586
7	101900000	102000000	1.74539
16	55000000	55100000	1.74491
9	71400000	71500000	1.74363
2	57200000	57300000	1.74329
7	62800000	62900000	1.74272
17	44100000	44200000	1.74272
8	127200000	127300000	1.73998
3	62200000	62300000	1.73956
11	75900000	76000000	1.73954
1	179100000	179200000	1.73934
1	158600000	158700000	1.73911
15	120900000	121000000	1.7386
16	54500000	54600000	1.73682
11	1100000	1200000	1.73631
13	132400000	132500000	1.73631
7	80100000	80200000	1.7356
13	36200000	36300000	1.73389
6	1700000	1800000	1.73308
13	216500000	216600000	1.73249
11	53900000	54000000	1.73192
5	44900000	45000000	1.7291
5	42000000	42100000	1.72874
1	179800000	179900000	1.72837
1	70000000	70100000	1.72616
6	79300000	79400000	1.72178
1	93900000	94000000	1.71982
13	49400000	49500000	1.71798
9	58000000	58100000	1.71741
13	37800000	37900000	1.7144
5	32200000	32300000	1.71396
1	180000000	180100000	1.71246
5	76200000	76300000	1.71006
1	96900000	97000000	1.70994
13	175500000	175600000	1.70975
4	108500000	108600000	1.70931
1	184700000	184800000	1.70905
6	83600000	83700000	1.70793
13	110300000	110400000	1.70595
15	146000000	146100000	1.70492
1	45400000	45500000	1.70299
3	60700000	60800000	1.70298
2	72100000	72200000	1.70225
2	83500000	83600000	1.702
3	23700000	23800000	1.70191
5	7900000	8000000	1.70126
11	0	100000	1.69994
3	114700000	114800000	1.6992
2	71400000	71500000	1.69904
10	71100000	71200000	1.69838
9	71200000	71300000	1.69614
5	40300000	40400000	1.69593
13	115400000	115500000	1.69494
1	117500000	117600000	1.69465
1	249900000	250000000	1.6943
1	125900000	126000000	1.69337
6	2300000	2400000	1.69266
17	66000000	66100000	1.6915
3	38000000	38100000	1.69093
13	83400000	83500000	1.6905
15	146200000	146300000	1.68744
3	46500000	46600000	1.68653
15	120700000	120800000	1.68625
6	65900000	66000000	1.68501
2	72800000	72900000	1.68479
1	162200000	162300000	1.68356
4	19000000	19100000	1.68354
2	61700000	61800000	1.68254
16	48300000	48400000	1.68203
1	252700000	252800000	1.68152
13	110600000	110700000	1.68087
8	43700000	43800000	1.68062
13	42100000	42200000	1.6806
8	45800000	45900000	1.68057
4	92400000	92500000	1.68056
2	32100000	32200000	1.68045
4	96300000	96400000	1.67967
15	83800000	83900000	1.67694
18	200000	300000	1.67563
5	55200000	55300000	1.67549
13	141100000	141200000	1.67511
13	106000000	106100000	1.67433
3	13300000	13400000	1.67299
5	26400000	26500000	1.67297
6	38900000	39000000	1.67132
6	70300000	70400000	1.671
13	113900000	114000000	1.67081
14	146300000	146400000	1.67075
9	83300000	83400000	1.66908
6	1400000	1500000	1.66823
3	39900000	40000000	1.66752
3	61800000	61900000	1.66724
3	142100000	142200000	1.66673
14	80000000	80100000	1.66582
13	94600000	94700000	1.66497
6	69900000	70000000	1.66402
6	77000000	77100000	1.66384
5	42600000	42700000	1.66308
15	77100000	77200000	1.66144
7	78300000	78400000	1.65989
5	13600000	13700000	1.65776
18	19500000	19600000	1.65768
17	36200000	36300000	1.65642
9	150300000	150400000	1.65546
13	36300000	36400000	1.65441
14	72900000	73000000	1.65184
16	48000000	48100000	1.65066
13	33500000	33600000	1.65057
1	79200000	79300000	1.6487
2	80400000	80500000	1.64749
1	65300000	65400000	1.64569
5	6800000	6900000	1.6452
1	152900000	153000000	1.64436
9	55000000	55100000	1.64337
6	34600000	34700000	1.64327
6	112600000	112700000	1.64065
13	133500000	133600000	1.64061
9	64800000	64900000	1.64027
16	52600000	52700000	1.63954
5	58400000	58500000	1.63918
4	136200000	136300000	1.63874
2	20300000	20400000	1.63642
7	118300000	118400000	1.6364
6	4900000	5000000	1.63566
2	62000000	62100000	1.63481
13	152000000	152100000	1.63376
9	78400000	78500000	1.6335
1	304500000	304600000	1.63335
10	78000000	78100000	1.631
1	119100000	119200000	1.63098
3	38100000	38200000	1.63034
17	32600000	32700000	1.63031
2	136300000	136400000	1.62832
13	119900000	120000000	1.62707
6	85000000	85100000	1.62554
3	53200000	53300000	1.62553
1	97200000	97300000	1.62414
1	235700000	235800000	1.62388
2	77600000	77700000	1.62326
13	112900000	113000000	1.62237
3	51600000	51700000	1.61785
14	61600000	61700000	1.61684
13	98800000	98900000	1.61673
2	18400000	18500000	1.61378
2	35600000	35700000	1.61347
3	88800000	88900000	1.61191
5	13700000	13800000	1.61171
15	76900000	77000000	1.61117
2	65100000	65200000	1.61093
3	93700000	93800000	1.6102
6	44800000	44900000	1.60963
18	1000000	1100000	1.60653
2	85100000	85200000	1.60653
17	66400000	66500000	1.60649
16	54300000	54400000	1.60646
1	286400000	286500000	1.60621
7	103600000	103700000	1.60555
9	77900000	78000000	1.60538
5	92800000	92900000	1.60528
15	104800000	104900000	1.60268
9	54700000	54800000	1.60145
3	51300000	51400000	1.60094
4	41600000	41700000	1.60023
6	80500000	80600000	1.60016
9	73300000	73400000	1.59953
4	84000000	84100000	1.59933
7	68800000	68900000	1.59919
1	53400000	53500000	1.59837
1	165600000	165700000	1.59786
3	53300000	53400000	1.59688
2	33600000	33700000	1.59606
1	79300000	79400000	1.59566
9	97200000	97300000	1.59458
17	66200000	66300000	1.59424
13	131500000	131600000	1.59337
13	173000000	173100000	1.5932
13	173600000	173700000	1.59293
13	143100000	143200000	1.59287
10	71500000	71600000	1.59176
1	79400000	79500000	1.58909
10	4700000	4800000	1.58908
1	170400000	170500000	1.58801
2	105600000	105700000	1.58775
16	39000000	39100000	1.58759
15	148400000	148500000	1.58758
6	132700000	132800000	1.58693
5	36600000	36700000	1.58489
2	74800000	74900000	1.58466
1	160000000	160100000	1.58287
7	62900000	63000000	1.58257
13	164200000	164300000	1.5821
11	69300000	69400000	1.58164
1	236800000	236900000	1.58059
5	40100000	40200000	1.58015
3	76700000	76800000	1.57962
9	101800000	101900000	1.5787
1	268200000	268300000	1.57673
3	67600000	67700000	1.57591
6	84900000	85000000	1.57589
9	57900000	58000000	1.57438
3	54200000	54300000	1.57373
13	96600000	96700000	1.57283
2	78000000	78100000	1.57112
1	43800000	43900000	1.57084
13	33800000	33900000	1.56974
2	56500000	56600000	1.5692
1	82700000	82800000	1.56918
5	58100000	58200000	1.56847
1	50500000	50600000	1.56822
1	285300000	285400000	1.56788
2	35400000	35500000	1.56787
7	72600000	72700000	1.56756
7	76200000	76300000	1.56696
10	71200000	71300000	1.56688
6	144500000	144600000	1.56643
2	61500000	61600000	1.56501
7	63100000	63200000	1.56457
9	140300000	140400000	1.56423
1	71300000	71400000	1.56374
16	53000000	53100000	1.56353
17	39000000	39100000	1.56353
17	57400000	57500000	1.56333
1	78300000	78400000	1.56262
13	83900000	84000000	1.56114
1	92900000	93000000	1.55755
6	75500000	75600000	1.55674
13	152900000	153000000	1.55618
9	78600000	78700000	1.55534
1	168300000	168400000	1.55435
5	53700000	53800000	1.55365
6	94800000	94900000	1.55271
3	71600000	71700000	1.55199
13	135900000	136000000	1.55114
3	40100000	40200000	1.55099
16	58800000	58900000	1.55093
6	143200000	143300000	1.55023
13	127500000	127600000	1.54956
5	45300000	45400000	1.54892
6	78300000	78400000	1.54857
3	52400000	52500000	1.54823
1	16700000	16800000	1.54726
9	74000000	74100000	1.54628
7	103800000	103900000	1.54524
9	53600000	53700000	1.54463
1	62300000	62400000	1.54451
8	122000000	122100000	1.54229
15	147000000	147100000	1.54142
3	62000000	62100000	1.54041
6	34700000	34800000	1.53956
1	111700000	111800000	1.53871
1	63000000	63100000	1.53816
4	41100000	41200000	1.53569
6	74800000	74900000	1.53552
13	175100000	175200000	1.53476
1	67400000	67500000	1.53413
4	46600000	46700000	1.53349
4	22600000	22700000	1.53283
4	6900000	7000000	1.53251
2	59500000	59600000	1.53101
6	112500000	112600000	1.53046
1	63300000	63400000	1.52786
16	51700000	51800000	1.5278
2	73800000	73900000	1.52644
6	78600000	78700000	1.52594
2	79900000	80000000	1.52575
13	138500000	138600000	1.52536
1	71200000	71300000	1.52436
9	71000000	71100000	1.52402
9	83100000	83200000	1.52394
4	50500000	50600000	1.52358
7	80900000	81000000	1.52246
7	60800000	60900000	1.52207
1	164400000	164500000	1.52193
9	102500000	102600000	1.52127
1	119600000	119700000	1.52064
3	42900000	43000000	1.51986
8	108900000	109000000	1.51982
13	141900000	142000000	1.51802
7	61600000	61700000	1.51745
16	55100000	55200000	1.51722
10	44400000	44500000	1.51637
2	77200000	77300000	1.51454
15	83500000	83600000	1.51425
2	59100000	59200000	1.51416
13	38700000	38800000	1.514
3	51500000	51600000	1.51365
1	240200000	240300000	1.51326
12	20000000	20100000	1.5131
4	90900000	91000000	1.51266
1	115400000	115500000	1.51151
13	91700000	91800000	1.51124
10	44000000	44100000	1.51038
14	53400000	53500000	1.51022
9	79500000	79600000	1.51005
1	151900000	152000000	1.5095
9	130000000	130100000	1.50917
3	120700000	120800000	1.50893
13	217800000	217900000	1.50874
1	178500000	178600000	1.50821
3	44700000	44800000	1.50819
5	2400000	2500000	1.50752
9	89800000	89900000	1.50741
1	270400000	270500000	1.50726
13	142400000	142500000	1.50694
13	110800000	110900000	1.5065
9	84200000	84300000	1.5063
7	80200000	80300000	1.50574
7	62100000	62200000	1.50515
6	82500000	82600000	1.50329
2	57700000	57800000	1.50314
6	114700000	114800000	1.50314
14	51100000	51200000	1.50263
1	9200000	9300000	1.5025
9	59600000	59700000	1.50198
4	43300000	43400000	1.50192
1	82800000	82900000	1.50145
6	142900000	143000000	1.50109
9	75300000	75400000	1.50107
18	41600000	41700000	1.50095
1	293800000	293900000	1.50068
1	143200000	143300000	1.49981
15	70800000	70900000	1.49977
15	88700000	88800000	1.49808
1	151200000	151300000	1.49668
3	45600000	45700000	1.49569
9	55600000	55700000	1.4955
3	141900000	142000000	1.49526
12	39300000	39400000	1.49483
6	107500000	107600000	1.49402
5	19800000	19900000	1.49008
8	49000000	49100000	1.48969
15	146100000	146200000	1.48889
1	44200000	44300000	1.48801
13	65200000	65300000	1.48663
1	239100000	239200000	1.48434
1	46800000	46900000	1.48365
14	135300000	135400000	1.48332
2	20500000	20600000	1.48319
13	201100000	201200000	1.48237
1	164700000	164800000	1.48087
9	71500000	71600000	1.48052
2	73900000	74000000	1.47965
3	38900000	39000000	1.47891
9	79600000	79700000	1.47881
1	264000000	264100000	1.4786
2	78600000	78700000	1.47829
13	117700000	117800000	1.47769
15	155800000	155900000	1.47676
1	145700000	145800000	1.4765
5	41500000	41600000	1.47645
9	91700000	91800000	1.47507
7	65500000	65600000	1.47403
9	125100000	125200000	1.47392
2	77300000	77400000	1.47263
16	52700000	52800000	1.47255
3	72800000	72900000	1.47187
9	101000000	101100000	1.47098
17	47000000	47100000	1.47023
13	91600000	91700000	1.46981
6	111300000	111400000	1.46977
1	234500000	234600000	1.46904
2	77400000	77500000	1.4689
2	78700000	78800000	1.46775
1	171700000	171800000	1.4665
12	55500000	55600000	1.46641
1	186200000	186300000	1.46259
18	49800000	49900000	1.46106
11	68200000	68300000	1.46063
6	70900000	71000000	1.46051
3	0	100000	1.46023
1	118300000	118400000	1.4595
1	239000000	239100000	1.45863
12	40500000	40600000	1.45818
11	10700000	10800000	1.45714
15	105300000	105400000	1.45623
6	71100000	71200000	1.45601
7	61900000	62000000	1.45544
1	261200000	261300000	1.45505
3	38700000	38800000	1.4545
9	67500000	67600000	1.4543
13	104800000	104900000	1.45386
1	111400000	111500000	1.45227
10	1900000	2000000	1.45215
3	100000	200000	1.45158
10	4600000	4700000	1.45112
1	71100000	71200000	1.45107
3	62400000	62500000	1.45093
2	34700000	34800000	1.45018
1	171800000	171900000	1.44954
13	83500000	83600000	1.44952
2	75300000	75400000	1.44935
1	292300000	292400000	1.44928
3	54000000	54100000	1.44908
4	83000000	83100000	1.44864
3	114300000	114400000	1.44841
5	96600000	96700000	1.44797
10	24000000	24100000	1.44788
1	101300000	101400000	1.44782
14	82400000	82500000	1.44734
7	60300000	60400000	1.44696
5	19000000	19100000	1.4469
17	36100000	36200000	1.44625
12	56300000	56400000	1.44573
7	70200000	70300000	1.44544
8	134100000	134200000	1.44409
14	49400000	49500000	1.44391
3	18300000	18400000	1.44364
6	65700000	65800000	1.44273
9	40900000	41000000	1.44245
1	184800000	184900000	1.44242
12	19600000	19700000	1.44194
1	44400000	44500000	1.44186
12	22200000	22300000	1.44104
2	65700000	65800000	1.44088
17	63900000	64000000	1.44055
3	50800000	50900000	1.43996
13	107900000	108000000	1.43965
13	140900000	141000000	1.43954
5	58200000	58300000	1.43852
1	223900000	224000000	1.43841
1	233400000	233500000	1.43783
9	52400000	52500000	1.43713
6	35000000	35100000	1.43628
1	236400000	236500000	1.43622
13	140100000	140200000	1.43579
9	77800000	77900000	1.43567
1	66100000	66200000	1.43556
2	80200000	80300000	1.43547
3	123800000	123900000	1.43496
13	89700000	89800000	1.43424
7	35500000	35600000	1.43342
3	80600000	80700000	1.43323
18	18800000	18900000	1.43312
13	42300000	42400000	1.43293
15	77900000	78000000	1.43284
9	71800000	71900000	1.43261
1	179400000	179500000	1.43186
2	59600000	59700000	1.43052
2	84900000	85000000	1.43048
3	56900000	57000000	1.43005
4	79800000	79900000	1.43001
3	61500000	61600000	1.42981
1	173100000	173200000	1.42908
8	133200000	133300000	1.42867
6	99600000	99700000	1.42839
9	97500000	97600000	1.42817
8	144500000	144600000	1.42733
2	74100000	74200000	1.42671
6	98900000	99000000	1.42623
9	73400000	73500000	1.42609
1	54500000	54600000	1.4258
18	22900000	23000000	1.42519
13	93200000	93300000	1.42504
1	260200000	260300000	1.42404
4	84800000	84900000	1.42311
1	233500000	233600000	1.42306
1	170600000	170700000	1.42292
1	225200000	225300000	1.42229
1	79100000	79200000	1.42148
3	95800000	95900000	1.42092
6	11100000	11200000	1.42061
1	223800000	223900000	1.41988
11	86800000	86900000	1.41957
13	145700000	145800000	1.41857
2	89000000	89100000	1.41854
3	84600000	84700000	1.41823
3	36400000	36500000	1.41772
13	137100000	137200000	1.4177
13	94100000	94200000	1.41705
7	129000000	129100000	1.41695
2	1800000	1900000	1.41679
1	307900000	308000000	1.41524
1	62600000	62700000	1.41463
5	54100000	54200000	1.4141
18	21300000	21400000	1.41407
3	55200000	55300000	1.41341
3	135200000	135300000	1.41325
1	129700000	129800000	1.41319
16	51500000	51600000	1.41276
6	77900000	78000000	1.41136
14	86700000	86800000	1.41092
8	121100000	121200000	1.41006
10	44200000	44300000	1.40948
3	54300000	54400000	1.40817
3	114200000	114300000	1.40782
3	106400000	106500000	1.40777
5	85000000	85100000	1.40708
1	75300000	75400000	1.40654
13	130800000	130900000	1.40602
7	68900000	69000000	1.4045
1	200700000	200800000	1.40437
2	75200000	75300000	1.40431
13	201000000	201100000	1.40418
13	118100000	118200000	1.40367
15	146400000	146500000	1.40278
15	149200000	149300000	1.40182
5	44000000	44100000	1.40171
9	53800000	53900000	1.40128
2	81700000	81800000	1.40049
7	129100000	129200000	1.3992
1	62400000	62500000	1.39889
18	54200000	54300000	1.39848
13	146400000	146500000	1.39845
6	140400000	140500000	1.39835
3	57000000	57100000	1.39809
1	171100000	171200000	1.39718
3	81900000	82000000	1.39583
2	65300000	65400000	1.39565
14	125800000	125900000	1.39532
10	70500000	70600000	1.39511
7	127100000	127200000	1.39492
1	169900000	170000000	1.39475
3	85000000	85100000	1.39413
6	140700000	140800000	1.39365
14	11700000	11800000	1.39272
2	52200000	52300000	1.39234
1	292700000	292800000	1.39216
15	72400000	72500000	1.39173
12	54000000	54100000	1.39122
18	1200000	1300000	1.39033
15	26400000	26500000	1.39007
12	53400000	53500000	1.39004
6	143000000	143100000	1.3893
14	84300000	84400000	1.38901
9	66400000	66500000	1.3878
1	152800000	152900000	1.38762
2	57400000	57500000	1.38755
2	147800000	147900000	1.38691
3	10900000	11000000	1.38643
13	90700000	90800000	1.38632
1	63900000	64000000	1.38571
13	114100000	114200000	1.38489
1	178400000	178500000	1.38454
5	18900000	19000000	1.38379
15	149700000	149800000	1.38356
5	57500000	57600000	1.38339
1	144200000	144300000	1.38225
1	175200000	175300000	1.38114
11	74900000	75000000	1.38054
4	91000000	91100000	1.37871
6	79200000	79300000	1.37866
8	46600000	46700000	1.37775
13	127400000	127500000	1.3764
1	70600000	70700000	1.37621
6	77400000	77500000	1.37533
14	30300000	30400000	1.37492
14	117400000	117500000	1.37439
13	112700000	112800000	1.37438
2	33800000	33900000	1.37394
2	77100000	77200000	1.37362
1	66600000	66700000	1.3726
3	86900000	87000000	1.37243
3	133400000	133500000	1.37235
13	33900000	34000000	1.37227
18	16300000	16400000	1.37163
7	81200000	81300000	1.37026
3	49600000	49700000	1.37004
3	40300000	40400000	1.36953
18	51100000	51200000	1.36905
13	137800000	137900000	1.36887
3	88400000	88500000	1.36882
13	151700000	151800000	1.36807
2	65000000	65100000	1.36806
9	49600000	49700000	1.36743
1	53700000	53800000	1.36649
5	59900000	60000000	1.36563
6	84400000	84500000	1.36463
14	95100000	95200000	1.36325
5	8200000	8300000	1.36112
13	113700000	113800000	1.36096
1	52000000	52100000	1.36046
17	38300000	38400000	1.36043
10	68900000	69000000	1.36002
17	36300000	36400000	1.35986
16	52800000	52900000	1.35948
8	79900000	80000000	1.3592
11	3200000	3300000	1.35841
1	32700000	32800000	1.35784
4	77200000	77300000	1.35619
1	121100000	121200000	1.35522
17	59800000	59900000	1.35477
13	162000000	162100000	1.35364
1	77500000	77600000	1.35352
1	143100000	143200000	1.35344
7	70000000	70100000	1.35273
2	90900000	91000000	1.35265
8	40100000	40200000	1.35231
2	19900000	20000000	1.3516
3	142500000	142600000	1.35147
9	77600000	77700000	1.35125
12	50100000	50200000	1.35093
1	201400000	201500000	1.35053
1	144400000	144500000	1.35007
6	50000000	50100000	1.34999
1	40400000	40500000	1.34959
3	44600000	44700000	1.34921
9	44400000	44500000	1.34866
13	200800000	200900000	1.34798
8	47700000	47800000	1.34633
8	45400000	45500000	1.34609
13	136800000	136900000	1.3455
1	224900000	225000000	1.34367
1	234600000	234700000	1.3434
9	108600000	108700000	1.34312
18	4300000	4400000	1.3424
6	69300000	69400000	1.34229
15	145700000	145800000	1.34207
4	90800000	90900000	1.34137
1	192700000	192800000	1.34094
6	1500000	1600000	1.3405
13	142800000	142900000	1.33901
13	197100000	197200000	1.33884
13	32900000	33000000	1.33854
9	80000000	80100000	1.33838
13	217900000	218000000	1.33838
2	77900000	78000000	1.33825
4	77700000	77800000	1.33805
7	109700000	109800000	1.33802
4	90400000	90500000	1.33775
17	57500000	57600000	1.3369
14	123900000	124000000	1.33628
9	150200000	150300000	1.33616
13	159000000	159100000	1.33576
17	65900000	66000000	1.3356
15	145400000	145500000	1.33534
9	126500000	126600000	1.33416
7	70600000	70700000	1.33362
7	79400000	79500000	1.33334
15	83200000	83300000	1.33319
4	47200000	47300000	1.33288
1	32800000	32900000	1.33287
1	250000000	250100000	1.33214
2	82700000	82800000	1.33109
3	126100000	126200000	1.33099
1	171300000	171400000	1.33097
2	68900000	69000000	1.33005
6	66100000	66200000	1.32975
3	44000000	44100000	1.32892
2	72400000	72500000	1.32888
5	32900000	33000000	1.32869

## Sheet: table S3
Table S3 Potential Candidate Regions Detected by CLR
Chr	Start	End	CLR
14	126600000	126700000	21753.3
14	126500000	126600000	21534.7
14	125100000	125200000	20693.7
14	126700000	126800000	20573.7
14	128200000	128300000	20333.1
14	126400000	126500000	20296.8
14	125200000	125300000	20144.4
14	125000000	125100000	19756.7
14	128300000	128400000	19733.2
14	128100000	128200000	19644.4
14	125600000	125700000	19287.5
14	125500000	125600000	18928.8
14	125700000	125800000	18826.8
14	128600000	128700000	18804.9
14	126800000	126900000	18575.9
14	128400000	128500000	18091.1
14	128500000	128600000	18075.7
14	128700000	128800000	17981.3
14	128000000	128100000	17854.1
14	124900000	125000000	17835.9
14	126300000	126400000	17621.3
14	125300000	125400000	17416.4
14	126100000	126200000	17352.4
14	124500000	124600000	17268.7
14	124400000	124500000	17126.8
14	126000000	126100000	17087.4
14	124200000	124300000	17009.2
14	125400000	125500000	16822.1
14	126200000	126300000	16720.9
14	125800000	125900000	16213.2
14	124100000	124200000	16119.6
14	124300000	124400000	15750.8
14	124600000	124700000	15651.3
14	124000000	124100000	15443.7
14	127900000	128000000	15266.2
14	127500000	127600000	15204.2
14	124800000	124900000	15157.7
14	130000000	130100000	14672.3
14	128800000	128900000	14628.6
14	129900000	130000000	14601.4
14	129700000	129800000	14462.4
14	127600000	127700000	14426.5
14	129800000	129900000	14402.5
14	130100000	130200000	13514.8
14	125900000	126000000	13463.5
14	129000000	129100000	12925.8
14	124700000	124800000	12923.6
14	123900000	124000000	12910.3
14	129500000	129600000	12891.8
14	127400000	127500000	12808.3
3	53900000	54000000	12418.2
3	53800000	53900000	12396.7
14	129600000	129700000	12388
3	52900000	53000000	12384.9
14	126900000	127000000	12270.4
3	53500000	53600000	12230.7
3	54000000	54100000	12219.6
3	53600000	53700000	12188.3
3	53000000	53100000	12106.9
3	53700000	53800000	11975.5
3	52800000	52900000	11901.1
3	53100000	53200000	11852.8
3	53200000	53300000	11808.2
3	53400000	53500000	11482
3	54100000	54200000	11381.5
3	53300000	53400000	11286.7
3	54300000	54400000	11140.5
3	52700000	52800000	11099.2
3	54200000	54300000	10978.8
14	130200000	130300000	10974.3
14	129400000	129500000	10915.2
14	123700000	123800000	10876.5
14	129200000	129300000	10765.6
14	123800000	123900000	10607.5
14	128900000	129000000	10587.2
3	54500000	54600000	10134.2
3	54400000	54500000	10056
14	129100000	129200000	10053.5
3	54600000	54700000	9581.79
14	129300000	129400000	9414.97
3	52600000	52700000	9249.73
14	127300000	127400000	8939.72
3	54700000	54800000	8900.4
14	123600000	123700000	8707.26
14	127800000	127900000	8556.05
3	54800000	54900000	8223.89
14	130500000	130600000	8216.45
3	54900000	55000000	8028.05
14	127000000	127100000	7747.1
3	55000000	55100000	7573.97
9	79300000	79400000	7307.51
8	123100000	123200000	7296.51
9	79400000	79500000	7215.06
9	79200000	79300000	7184.34
14	127700000	127800000	7159.8
8	123000000	123100000	7135.45
14	130600000	130700000	7125.98
2	88700000	88800000	7097.29
2	88800000	88900000	6968.88
9	79500000	79600000	6965.83
3	51000000	51100000	6927.77
14	130300000	130400000	6887.52
3	55100000	55200000	6875.45
9	79100000	79200000	6841.18
3	50900000	51000000	6770.92
2	88300000	88400000	6751.54
9	79600000	79700000	6734.1
3	52500000	52600000	6679.75
2	86400000	86500000	6669.22
9	80500000	80600000	6647.17
8	123200000	123300000	6646.82
9	82700000	82800000	6606.31
9	80600000	80700000	6598.47
3	51100000	51200000	6586.73
15	115400000	115500000	6563.3
9	79000000	79100000	6529.18
9	82600000	82700000	6487.44
15	115300000	115400000	6482.21
8	123400000	123500000	6458.35
2	86300000	86400000	6458.33
9	80400000	80500000	6451.39
9	82800000	82900000	6425.89
9	79700000	79800000	6404.04
15	115700000	115800000	6382.98
15	115500000	115600000	6377.31
15	115600000	115700000	6376.44
2	88500000	88600000	6364.94
9	82500000	82600000	6349.91
9	82900000	83000000	6291.98
8	122900000	123000000	6271.05
15	115200000	115300000	6259.3
9	78900000	79000000	6241.76
9	79900000	80000000	6236.78
9	79800000	79900000	6234.11
2	88600000	88700000	6198.94
15	115800000	115900000	6176.86
9	82400000	82500000	6175.79
15	67400000	67500000	6159.51
2	88900000	89000000	6133.5
3	52100000	52200000	6115.76
15	67300000	67400000	6056.17
14	130800000	130900000	6033.96
15	115100000	115200000	6015.33
9	80300000	80400000	5990.58
9	81000000	81100000	5973.31
15	67200000	67300000	5942.17
15	67500000	67600000	5937.51
9	83500000	83600000	5927.37
3	55200000	55300000	5918.37
9	80900000	81000000	5893.75
9	83600000	83700000	5887.48
15	115000000	115100000	5878.75
15	115900000	116000000	5855.62
14	130900000	131000000	5853.49
9	80700000	80800000	5845.95
2	88400000	88500000	5807.73
9	83400000	83500000	5781.15
3	51200000	51300000	5751.1
9	80000000	80100000	5734.15
9	83700000	83800000	5729.64
15	67100000	67200000	5717.02
9	78800000	78900000	5714.02
9	81100000	81200000	5706.31
15	116000000	116100000	5668.22
9	80200000	80300000	5652.98
2	88200000	88300000	5631.75
15	114900000	115000000	5626.93
9	80800000	80900000	5616.39
9	83000000	83100000	5564.92
2	88100000	88200000	5525.2
15	67000000	67100000	5518.55
15	116100000	116200000	5479.37
15	146400000	146500000	5454.96
15	67600000	67700000	5422.81
9	83800000	83900000	5414.17
9	82300000	82400000	5398.96
9	78700000	78800000	5348.15
15	146700000	146800000	5337.5
3	50300000	50400000	5335.87
15	146800000	146900000	5334.88
15	66900000	67000000	5329.18
15	116300000	116400000	5264.6
9	83300000	83400000	5255.89
8	123500000	123600000	5218.93
2	83100000	83200000	5215.3
1	261600000	261700000	5214.85
15	66100000	66200000	5206.69
15	67700000	67800000	5178.27
15	114800000	114900000	5170.03
14	130700000	130800000	5159.53
15	116400000	116500000	5129.31
2	89000000	89100000	5125.53
1	261800000	261900000	5125.17
2	88000000	88100000	5118.34
3	52000000	52100000	5108.63
15	68100000	68200000	5099.63
9	54300000	54400000	5094.49
15	116200000	116300000	5076.13
3	55300000	55400000	5065.91
1	261700000	261800000	5034.16
15	68200000	68300000	5014.33
9	54200000	54300000	5004.86
9	80100000	80200000	4992.21
1	261900000	262000000	4988.57
3	55500000	55600000	4987.98
9	81200000	81300000	4976.31
8	122800000	122900000	4960.78
9	83900000	84000000	4949.75
2	83300000	83400000	4925.81
2	83200000	83300000	4923.73
15	66000000	66100000	4919.11
9	68500000	68600000	4914.78
1	261500000	261600000	4885.97
9	54100000	54200000	4876.68
9	54400000	54500000	4830.94
15	114700000	114800000	4814.97
15	68000000	68100000	4813.28
3	50400000	50500000	4807.59
14	130400000	130500000	4805.72
2	86500000	86600000	4784.89
2	83400000	83500000	4770.52
9	68400000	68500000	4764.84
1	262000000	262100000	4730.01
15	146300000	146400000	4719.79
2	83000000	83100000	4716.49
9	54000000	54100000	4707.28
15	116500000	116600000	4687.46
9	78600000	78700000	4683.94
14	131500000	131600000	4679.49
15	114600000	114700000	4647.7
1	262100000	262200000	4626.84
15	68300000	68400000	4624
1	261400000	261500000	4619.74
14	127100000	127200000	4616.18
15	66200000	66300000	4605.74
9	54500000	54600000	4601.34
3	50200000	50300000	4574.95
1	262300000	262400000	4542.99
3	52400000	52500000	4505.7
3	50800000	50900000	4501.11
3	55400000	55500000	4460.94
2	79700000	79800000	4454.16
6	32100000	32200000	4443.78
15	114500000	114600000	4425.85
15	147000000	147100000	4392.98
9	68600000	68700000	4385.26
2	85000000	85100000	4380.4
14	127200000	127300000	4370.42
6	32200000	32300000	4357.6
2	79800000	79900000	4349.46
9	84000000	84100000	4341.39
2	79600000	79700000	4339.36
6	32000000	32100000	4336.98
2	79900000	80000000	4323.91
15	66800000	66900000	4311.07
1	262200000	262300000	4231.93
15	67800000	67900000	4227.73
9	54600000	54700000	4224.07
15	68400000	68500000	4188.75
15	114400000	114500000	4185.07
15	116600000	116700000	4171.71
2	80000000	80100000	4123.24
9	68700000	68800000	4089.99
15	66300000	66400000	4082.07
9	53900000	54000000	4073.28
14	123500000	123600000	4046.49
15	146900000	147000000	4039.4
3	55600000	55700000	4033.23
15	116700000	116800000	4022.45
6	32300000	32400000	4022.31
15	65800000	65900000	4020.95
14	131400000	131500000	4014.69
2	79500000	79600000	4006.75
14	131300000	131400000	3997.11
15	114300000	114400000	3982.18
2	86200000	86300000	3979.96
9	82200000	82300000	3938.68
3	51900000	52000000	3930.79
15	66400000	66500000	3918.17
9	78500000	78600000	3886.91
6	32400000	32500000	3886.02
2	85100000	85200000	3882.45
9	83100000	83200000	3870.06
6	31900000	32000000	3854.16
15	146200000	146300000	3843.92
3	49900000	50000000	3835.61
1	261300000	261400000	3823.29
2	83500000	83600000	3820.1
15	114200000	114300000	3804.48
15	65900000	66000000	3798.25
9	84100000	84200000	3797.97
3	50000000	50100000	3794.62
9	81300000	81400000	3766.31
2	82600000	82700000	3760.91
14	131600000	131700000	3741.97
9	68300000	68400000	3721.33
15	65700000	65800000	3669.77
1	261200000	261300000	3630.11
15	114100000	114200000	3615.44
15	68500000	68600000	3615.27
1	262400000	262500000	3607.43
3	55700000	55800000	3605.91
2	82500000	82600000	3599.85
9	54700000	54800000	3594.3
2	86100000	86200000	3592.09
15	147100000	147200000	3586.71
15	145500000	145600000	3577.55
2	84700000	84800000	3561.08
15	65600000	65700000	3552.51
2	82400000	82500000	3548.64
2	82300000	82400000	3536.7
6	32500000	32600000	3526.39
9	53700000	53800000	3521.19
8	123300000	123400000	3508.25
2	80100000	80200000	3506.27
9	83200000	83300000	3489.27
15	146600000	146700000	3484.74
9	53800000	53900000	3467.26
14	131100000	131200000	3456.76
15	114000000	114100000	3446.24
3	52200000	52300000	3442.66
15	147200000	147300000	3440.05
15	116800000	116900000	3395.87
15	146100000	146200000	3384.95
3	49800000	49900000	3355.79
15	67900000	68000000	3346.39
2	79400000	79500000	3343.52
2	89100000	89200000	3343.46
10	50600000	50700000	3325.57
3	51300000	51400000	3281.77
1	264000000	264100000	3281.32
9	68800000	68900000	3251.06
15	145800000	145900000	3250.92
6	32600000	32700000	3230.61
1	263500000	263600000	3225.41
2	84900000	85000000	3221.28
2	86700000	86800000	3208.98
9	78200000	78300000	3203.94
2	86600000	86700000	3201.65
9	78100000	78200000	3195.63
9	78000000	78100000	3156.5
2	87900000	88000000	3116.53
9	89500000	89600000	3108.31
9	89300000	89400000	3089.95
15	66600000	66700000	3089.44
9	78300000	78400000	3088.39
2	82900000	83000000	3088.17
15	68600000	68700000	3085.52
15	113900000	114000000	3072.89
2	86900000	87000000	3065.74
1	261100000	261200000	3051.58
15	145600000	145700000	3044.19
3	50100000	50200000	3036.38
1	262500000	262600000	3021.31
9	89400000	89500000	3004.39
2	86800000	86900000	2978.26
15	119600000	119700000	2976.43
9	89200000	89300000	2975.81
15	119500000	119600000	2958.41
2	79300000	79400000	2954.82
2	80300000	80400000	2953.7
2	80200000	80300000	2940.39
9	53600000	53700000	2927.21
9	89100000	89200000	2923.61
2	82200000	82300000	2916.49
9	68900000	69000000	2906.06
2	82700000	82800000	2905.81
2	80400000	80500000	2896.25
2	84600000	84700000	2879.59
9	84200000	84300000	2856.68
1	263600000	263700000	2854.75
15	66700000	66800000	2847.56
12	40600000	40700000	2825.17
3	52300000	52400000	2806.3
3	50700000	50800000	2784.56
9	54800000	54900000	2774.97
9	89800000	89900000	2774.32
15	113800000	113900000	2766.23
9	77900000	78000000	2757.34
12	22100000	22200000	2749.25
6	31800000	31900000	2738.82
9	78400000	78500000	2734.42
9	89900000	90000000	2734.19
14	131200000	131300000	2704.51
9	88300000	88400000	2693.99
9	62200000	62300000	2652.55
9	89700000	89800000	2642.15
3	49700000	49800000	2632.68
1	264100000	264200000	2603.73
1	263700000	263800000	2586.1
9	62100000	62200000	2567.96
6	32700000	32800000	2567.64
12	22000000	22100000	2565.86
6	113300000	113400000	2560.79
2	89900000	90000000	2556.86
12	22300000	22400000	2545.39
1	263900000	264000000	2516
15	119700000	119800000	2509.69
15	68700000	68800000	2506.69
14	131000000	131100000	2499.87
12	40500000	40600000	2496.04
2	156700000	156800000	2494.42
6	31500000	31600000	2493.84
6	64800000	64900000	2492.24
2	86000000	86100000	2489.41
12	21800000	21900000	2470.05
9	53500000	53600000	2466.01
2	80500000	80600000	2446.21
6	32900000	33000000	2436
15	145700000	145800000	2413.19
15	119400000	119500000	2409.48
9	81800000	81900000	2402.32
16	40500000	40600000	2365.82
9	89600000	89700000	2361.85
9	89000000	89100000	2344.14
12	22200000	22300000	2331
9	66200000	66300000	2316.68
13	146200000	146300000	2314.03
8	122700000	122800000	2313.69
1	264300000	264400000	2304.82
13	198400000	198500000	2295.94
9	82100000	82200000	2290.44
18	49700000	49800000	2289.92
13	146000000	146100000	2285.15
9	69000000	69100000	2271.3
6	64500000	64600000	2267.97
10	50500000	50600000	2266.63
6	32800000	32900000	2266.45
1	50300000	50400000	2261.56
6	33000000	33100000	2254.79
15	113700000	113800000	2249.69
9	91500000	91600000	2242.25
6	64700000	64800000	2237.61
9	81700000	81800000	2230.47
9	77800000	77900000	2227.16
9	91300000	91400000	2212.85
15	65500000	65600000	2188.25
9	81900000	82000000	2180.99
2	84800000	84900000	2172.05
8	123600000	123700000	2168.99
9	85700000	85800000	2160.43
9	91200000	91300000	2143.5
12	40700000	40800000	2136.62
9	87700000	87800000	2135.3
9	91400000	91500000	2115.1
13	145900000	146000000	2110.38
9	87600000	87700000	2097.95
15	145400000	145500000	2089
1	55400000	55500000	2086.18
13	214500000	214600000	2080.27
12	55600000	55700000	2072.1
9	88000000	88100000	2071.19
6	113400000	113500000	2043.92
15	113600000	113700000	2040.34
9	66100000	66200000	2026.83
6	64900000	65000000	2011.93
9	88100000	88200000	2009.35
3	50500000	50600000	2007.71
9	87400000	87500000	1993.99
9	66300000	66400000	1993.68
2	78200000	78300000	1980.55
9	69100000	69200000	1974.24
14	80300000	80400000	1973.87
17	58600000	58700000	1971.46
9	90000000	90100000	1970.98
9	85600000	85700000	1968.38
2	78100000	78200000	1967.11
13	145800000	145900000	1958
16	40400000	40500000	1954.96
9	88600000	88700000	1952.3
8	4000000	4100000	1948.83
9	68200000	68300000	1941.69
2	78000000	78100000	1938.75
15	79900000	80000000	1932.89
15	66500000	66600000	1923.81
12	22400000	22500000	1917.89
9	87500000	87600000	1916
17	58700000	58800000	1911.39
15	80500000	80600000	1908.77
9	91100000	91200000	1898.94
16	71300000	71400000	1898.01
15	146500000	146600000	1896.29
15	80400000	80500000	1889.26
15	79600000	79700000	1879.37
6	31400000	31500000	1879.28
6	33100000	33200000	1873
15	79500000	79600000	1871.91
1	55300000	55400000	1857.79
9	88500000	88600000	1856.9
15	145900000	146000000	1856.67
15	80600000	80700000	1855.28
1	261000000	261100000	1854.6
2	82100000	82200000	1850.4
15	116900000	117000000	1849.22
15	68800000	68900000	1845.1
15	79400000	79500000	1841.67
15	80100000	80200000	1838.22
2	80600000	80700000	1837.79
9	88200000	88300000	1832.36
15	80000000	80100000	1827.99
15	113100000	113200000	1826.92
2	83600000	83700000	1821.12
5	55300000	55400000	1816.33
15	119300000	119400000	1812.72
15	113200000	113300000	1807.3
2	85200000	85300000	1801.84
12	55700000	55800000	1797
15	79700000	79800000	1794.46
15	81200000	81300000	1792.21
15	80300000	80400000	1782.65
9	91600000	91700000	1775.06
9	88400000	88500000	1771.78
3	55800000	55900000	1771.57
9	150000000	150100000	1770.32
7	81100000	81200000	1763.49
1	262600000	262700000	1758.82
13	146100000	146200000	1758.73
2	89800000	89900000	1755.62
9	91000000	91100000	1741.1
15	80200000	80300000	1740.87
15	81300000	81400000	1740.29
1	235600000	235700000	1740.06
9	149800000	149900000	1738.97
15	79300000	79400000	1728.44
9	85800000	85900000	1719.14
6	114000000	114100000	1718.1
4	6600000	6700000	1710.01
15	119800000	119900000	1697.38
2	34000000	34100000	1680.51
9	140100000	140200000	1680.43
1	49300000	49400000	1676.73
7	80900000	81000000	1672.55
13	197000000	197100000	1672.01
16	71400000	71500000	1668.49
15	80700000	80800000	1665.74
15	79800000	79900000	1660.11
13	214400000	214500000	1659.72
4	11200000	11300000	1652.46
3	56600000	56700000	1650.72
9	87800000	87900000	1650.02
4	141500000	141600000	1645.21
6	66200000	66300000	1639.21
1	51600000	51700000	1638.06
14	80200000	80300000	1635.83
13	201000000	201100000	1633.98
9	87300000	87400000	1626.88
2	79200000	79300000	1609.55
16	57300000	57400000	1605.21
3	55900000	56000000	1600.39
5	55200000	55300000	1595.41
5	86000000	86100000	1593.88
1	50200000	50300000	1593.66
1	235500000	235600000	1581.69
9	81600000	81700000	1579.52
15	79200000	79300000	1575.79
9	150100000	150200000	1575.52
3	49600000	49700000	1573.49
9	85900000	86000000	1565.76
5	55400000	55500000	1561.9
7	80800000	80900000	1557.93
9	54900000	55000000	1556.02
12	55500000	55600000	1555.36
2	90100000	90200000	1553.53
15	113300000	113400000	1551.82
1	262700000	262800000	1548.64
2	87400000	87500000	1546.38
7	81200000	81300000	1545.68
5	86100000	86200000	1535.7
15	65300000	65400000	1534.76
1	263400000	263500000	1532.08
2	90000000	90100000	1526.01
6	114100000	114200000	1525.18
2	87500000	87600000	1520.93
1	260800000	260900000	1514.39
1	264400000	264500000	1512.69
15	81100000	81200000	1508.89
7	81000000	81100000	1505.78
1	55500000	55600000	1500.77
7	81300000	81400000	1499.33
12	55800000	55900000	1495.66
13	145700000	145800000	1494.8
3	84700000	84800000	1493.44
16	57200000	57300000	1474.9
2	77900000	78000000	1462.55
18	49000000	49100000	1460.31
9	149900000	150000000	1458.91
15	81400000	81500000	1456.2
9	90100000	90200000	1456.01
6	140100000	140200000	1455.89
6	65100000	65200000	1455.4
2	82800000	82900000	1454.32
12	22500000	22600000	1452.92
15	120200000	120300000	1450.07
6	31700000	31800000	1446.42
15	113000000	113100000	1433.35
18	49300000	49400000	1433.28
1	49200000	49300000	1433.05
6	113200000	113300000	1432.46
18	55300000	55400000	1427.08
18	55200000	55300000	1422.73
13	201100000	201200000	1419.54
2	83700000	83800000	1419.26
9	75800000	75900000	1418.08
5	78300000	78400000	1418.06
12	40400000	40500000	1412.98
2	87000000	87100000	1412.39
13	146300000	146400000	1412.08
4	11300000	11400000	1411.62
18	49100000	49200000	1410.98
3	56100000	56200000	1410.34
15	79100000	79200000	1408.86
9	84300000	84400000	1400.85
9	86400000	86500000	1395.57
1	264500000	264600000	1389.29
9	87200000	87300000	1382.59
9	66400000	66500000	1378.75
2	156800000	156900000	1376.28
9	86500000	86600000	1370.67
17	36100000	36200000	1367.94
14	105100000	105200000	1360.37
5	86300000	86400000	1345.69
2	84500000	84600000	1337.41
18	49800000	49900000	1334.33
9	87900000	88000000	1331.62
15	120900000	121000000	1330.18
6	65000000	65100000	1328.86
8	41000000	41100000	1326.59
5	69300000	69400000	1318.97
3	84600000	84700000	1313.01
5	50000000	50100000	1312.64
9	62300000	62400000	1312.46
18	49400000	49500000	1310.16
14	131700000	131800000	1303.26
15	81500000	81600000	1302.6
5	55500000	55600000	1295.82
6	113500000	113600000	1293.48
6	112600000	112700000	1289.75
16	58200000	58300000	1289.14
1	264800000	264900000	1288.48
4	141600000	141700000	1279.07
9	88700000	88800000	1278.29
14	105200000	105300000	1277.09
1	235700000	235800000	1277.04
2	83800000	83900000	1274.72
9	75700000	75800000	1273.73
9	77700000	77800000	1271.33
10	35000000	35100000	1268.28
9	66500000	66600000	1264.85
15	113400000	113500000	1264.1
7	80700000	80800000	1259.22
5	55000000	55100000	1259.14
16	40900000	41000000	1257.63
3	26000000	26100000	1256.25
14	152900000	153000000	1256.12
9	77600000	77700000	1253.68
18	1400000	1500000	1252.98
15	80800000	80900000	1252.58
14	80100000	80200000	1249.13
18	51100000	51200000	1244.47
5	49900000	50000000	1242.27
5	69200000	69300000	1240.85
16	57400000	57500000	1234.86
15	81000000	81100000	1230.51
13	214000000	214100000	1228.94
1	264700000	264800000	1225.24
3	87000000	87100000	1225
16	39800000	39900000	1224.93
16	39900000	40000000	1224.24
15	64800000	64900000	1219.9
9	53100000	53200000	1217.19
14	153000000	153100000	1216.2
10	35100000	35200000	1215.53
9	69200000	69300000	1213.74
1	235200000	235300000	1213.17
9	70800000	70900000	1209.8
15	117600000	117700000	1209.09
2	33900000	34000000	1206.43
14	80400000	80500000	1200.64
9	85500000	85600000	1198.91
3	56900000	57000000	1194.52
5	86200000	86300000	1192.59
3	57400000	57500000	1189.6
15	78500000	78600000	1182.67
6	65500000	65600000	1182.48
15	81600000	81700000	1182.42
10	30800000	30900000	1179.88
9	150200000	150300000	1179.62
3	57000000	57100000	1171.89
18	1300000	1400000	1169.5
4	43900000	44000000	1169.27
17	7300000	7400000	1168.32
15	113500000	113600000	1161.08
1	55200000	55300000	1160.85
15	88600000	88700000	1157.46
5	69500000	69600000	1157.34
13	198300000	198400000	1155.47
3	87100000	87200000	1153.72
15	78400000	78500000	1149.94
10	50700000	50800000	1148.44
13	196600000	196700000	1147.93
6	33300000	33400000	1143.48
2	80700000	80800000	1140.67
3	56500000	56600000	1139.53
9	135500000	135600000	1137.8
8	14600000	14700000	1134.27
1	269500000	269600000	1130.49
3	51800000	51900000	1129.42
15	121200000	121300000	1129.38
4	141400000	141500000	1128.65
12	21700000	21800000	1125.45
2	73900000	74000000	1122.41
13	214100000	214200000	1121.74
15	119200000	119300000	1121.08
15	79000000	79100000	1119.65
1	263800000	263900000	1116.87
6	113900000	114000000	1114.9
2	76300000	76400000	1111.54
5	69400000	69500000	1109.93
12	45000000	45100000	1106.86
8	14500000	14600000	1106.11
15	124000000	124100000	1104.43
9	68100000	68200000	1102.89
3	84900000	85000000	1099.74
9	88900000	89000000	1099.52
6	140000000	140100000	1096.62
15	82800000	82900000	1094.89
15	65400000	65500000	1090.74
15	146000000	146100000	1087.73
2	76400000	76500000	1087.38
1	236100000	236200000	1085.73
8	3900000	4000000	1085.57
17	58500000	58600000	1083.71
6	75300000	75400000	1082.54
6	33200000	33300000	1079.28
14	131800000	131900000	1077.07
12	21900000	22000000	1075.86
15	68900000	69000000	1073.41
6	64400000	64500000	1067.94
15	80900000	81000000	1066.94
2	73800000	73900000	1062.63
9	92000000	92100000	1060.44
5	86500000	86600000	1060.22
9	91700000	91800000	1058.35
15	88700000	88800000	1053.69
15	112900000	113000000	1048.79
6	75200000	75300000	1048.12
1	208400000	208500000	1048.07
2	31700000	31800000	1046.88
1	207600000	207700000	1045.64
15	82900000	83000000	1045.15
10	71900000	72000000	1042.74
7	115000000	115100000	1041.69
2	74000000	74100000	1038.87
5	50100000	50200000	1036.4
6	64600000	64700000	1032.09
15	120600000	120700000	1031.68
3	84800000	84900000	1031.11
1	237500000	237600000	1028.24
15	78600000	78700000	1028.23
13	131600000	131700000	1027.29
15	82400000	82500000	1025.32
7	126900000	127000000	1024.47
9	66000000	66100000	1020.11
1	49500000	49600000	1017.93
3	56200000	56300000	1016.76
15	124100000	124200000	1011.61
1	52700000	52800000	1011.24
6	65300000	65400000	1011.05
13	201700000	201800000	1010.27
8	34000000	34100000	1009.44
4	43800000	43900000	1003.73
1	269400000	269500000	997.365
5	55600000	55700000	988.226
1	114100000	114200000	987.905
17	36200000	36300000	986.485
2	74400000	74500000	983.159
18	23900000	24000000	981.197
4	40000000	40100000	979.182
4	39900000	40000000	977.521
6	66300000	66400000	974.465
15	83400000	83500000	974.116
15	81900000	82000000	972.683
3	84400000	84500000	972.491
2	31800000	31900000	969.462
10	51500000	51600000	969.045
15	81800000	81900000	969.018
6	65200000	65300000	965.66
17	7400000	7500000	965.108
17	58100000	58200000	960.214
15	69100000	69200000	957.873
13	197100000	197200000	957.094
14	152600000	152700000	955.995
5	78600000	78700000	955.91
9	64600000	64700000	946.501
6	87200000	87300000	944.06
6	87000000	87100000	941.274
8	41100000	41200000	939.409
9	140000000	140100000	935.096
15	82000000	82100000	933.629
15	82500000	82600000	933.424
15	82700000	82800000	931.299
6	87100000	87200000	930.1
2	34100000	34200000	929.597
15	83300000	83400000	927.39
15	121000000	121100000	927.376
8	113400000	113500000	927.199
3	85000000	85100000	925.503
5	56600000	56700000	924.101
18	42300000	42400000	923.269
2	73700000	73800000	920.837
14	117400000	117500000	916.137
3	84300000	84400000	916.117
13	145600000	145700000	911.863
2	76500000	76600000	911.594
15	82300000	82400000	910.24
5	86400000	86500000	909.198
5	70100000	70200000	905.848
9	82000000	82100000	900.595
1	264200000	264300000	899.013
12	22600000	22700000	894.478
16	57100000	57200000	893.835
15	78900000	79000000	893.538
9	62000000	62100000	893.379
15	78300000	78400000	892.206
6	112300000	112400000	891.736
16	40600000	40700000	890.615
3	56700000	56800000	890.107
12	12300000	12400000	889.595
4	6500000	6600000	888.953
1	49400000	49500000	888.839
9	64500000	64600000	882.209
6	114800000	114900000	878.683
15	82100000	82200000	878.549
9	86600000	86700000	878.124
9	19200000	19300000	874.248
10	1200000	1300000	871.601
8	132500000	132600000	869.471
9	64800000	64900000	869.055
12	21600000	21700000	868.436
15	117700000	117800000	867.144
16	58100000	58200000	866.918
1	114000000	114100000	866.884
6	144500000	144600000	866.812
15	82200000	82300000	864.363
3	81600000	81700000	864.158
9	92100000	92200000	863.574
15	81700000	81800000	863.447
15	83100000	83200000	863.291
14	152800000	152900000	863.006
15	83000000	83100000	862.582
6	30600000	30700000	861.399
13	143100000	143200000	860.999
15	117900000	118000000	859.248
1	237600000	237700000	858.156
15	121300000	121400000	855.656
2	74500000	74600000	852.662
1	52400000	52500000	852.225
14	132200000	132300000	847.947
8	122400000	122500000	847.904
1	207500000	207600000	847.565
12	55900000	56000000	843.136
16	58500000	58600000	838.907
8	40900000	41000000	837.062
5	58200000	58300000	836.433
9	67300000	67400000	836.32
5	50200000	50300000	835.041
9	140800000	140900000	831.663
15	147300000	147400000	828.966
1	50100000	50200000	827.805
9	57900000	58000000	827.721
1	57100000	57200000	827.053
1	269700000	269800000	827.053
9	90900000	91000000	826.499
9	81400000	81500000	822.645
6	144600000	144700000	821.367
6	114700000	114800000	821.096
2	87800000	87900000	820.017
10	35200000	35300000	817.922
15	82600000	82700000	817.793
15	120100000	120200000	813.759
15	83200000	83300000	813.652
1	51800000	51900000	812.649
15	65200000	65300000	812.439
1	236700000	236800000	812.438
2	89300000	89400000	811.057
6	75000000	75100000	806.028
9	70200000	70300000	805.935
11	84000000	84100000	804.379
6	65400000	65500000	802.177
4	40100000	40200000	802.076
14	29700000	29800000	801.317
3	57300000	57400000	801.256
9	60700000	60800000	800.671
13	143000000	143100000	798.879
15	26300000	26400000	798.671
10	51600000	51700000	798.498
7	130000000	130100000	798.159
18	55000000	55100000	795.707
7	126800000	126900000	795.006
6	140200000	140300000	794.809
4	135500000	135600000	793.287
1	114200000	114300000	792.96
2	74300000	74400000	789.387
3	84500000	84600000	788.375
9	67200000	67300000	787.556
2	76200000	76300000	785.531
5	58300000	58400000	781.777
16	44600000	44700000	780.343
13	198000000	198100000	780.016
9	70900000	71000000	778.39
16	7100000	7200000	776.895
15	83500000	83600000	776.068
1	236000000	236100000	775.193
1	269600000	269700000	774.548
18	49500000	49600000	773.997
15	120700000	120800000	773.253
6	114200000	114300000	771.309
4	143200000	143300000	770.23
2	87100000	87200000	770.136
5	58400000	58500000	768.68
3	81900000	82000000	764.87
9	75900000	76000000	763.041
6	144700000	144800000	760.626
4	10100000	10200000	757.905
9	86000000	86100000	756.417
13	4600000	4700000	754.342
4	6700000	6800000	754.223
1	113900000	114000000	753.24
5	56500000	56600000	753.08
2	156900000	157000000	751.207
18	800000	900000	750.548
13	214200000	214300000	747.615
1	293600000	293700000	747.536
1	200500000	200600000	745.658
16	41000000	41100000	745.413
12	32600000	32700000	744.865
9	64700000	64800000	743.374
8	137700000	137800000	742.134
9	86300000	86400000	740.112
5	56700000	56800000	738.569
6	86700000	86800000	738.223
5	58500000	58600000	737.572
1	275200000	275300000	737.064
8	124400000	124500000	736.843
9	84400000	84500000	736.774
1	52300000	52400000	734.421
15	145300000	145400000	734.32
5	50300000	50400000	733.209
15	78700000	78800000	733.01
6	64300000	64400000	732.712
15	117500000	117600000	731.05
2	74200000	74300000	728.057
9	77500000	77600000	727.663
4	39800000	39900000	727.337
6	74900000	75000000	726.915
5	88300000	88400000	726.62
8	124300000	124400000	726.594
1	18200000	18300000	725.84
18	55100000	55200000	725.668
5	70000000	70100000	725.614
12	44900000	45000000	725.379
9	87100000	87200000	724.68
4	135400000	135500000	724.132
10	70500000	70600000	724.031
9	90600000	90700000	723.524
6	112200000	112300000	723.466
1	208300000	208400000	720.385
3	57500000	57600000	719.745
5	49800000	49900000	719.592
17	58800000	58900000	719.391
3	81700000	81800000	716.37
6	86100000	86200000	715.912
18	51000000	51100000	715.677
4	44100000	44200000	714.173
2	76100000	76200000	712.898
1	235300000	235400000	711.285
1	234900000	235000000	709.721
16	44500000	44600000	707.744
3	25900000	26000000	705.523
1	264600000	264700000	703.837
2	89200000	89300000	703.378
1	113700000	113800000	701.541
1	56600000	56700000	701.08
1	208500000	208600000	701.052
12	56100000	56200000	698.767
17	22700000	22800000	698.008
16	40800000	40900000	697.242
1	293500000	293600000	696.344
4	134700000	134800000	695.958
2	76600000	76700000	695.847
13	204000000	204100000	694.576
16	45200000	45300000	691.265
5	55100000	55200000	690.81
13	143200000	143300000	689.8
12	12400000	12500000	689.787
9	58000000	58100000	689.221
2	78300000	78400000	686.614
5	90800000	90900000	686.248
6	31600000	31700000	686.173
13	75700000	75800000	684.831
15	118000000	118100000	683.929
2	89700000	89800000	683.833
13	139800000	139900000	683.196
1	263100000	263200000	680.5
14	131900000	132000000	679.331
7	76500000	76600000	679.176
16	71200000	71300000	676.458
7	80600000	80700000	676.353
7	127000000	127100000	675.852
8	124200000	124300000	675.618
13	145400000	145500000	675.034
1	52600000	52700000	674.325
17	7200000	7300000	673.718
9	62800000	62900000	672.869
17	58000000	58100000	672.781
10	31000000	31100000	672.144
13	200900000	201000000	672.088
18	47900000	48000000	672.002
1	207400000	207500000	671.909
5	55900000	56000000	668.524
1	186500000	186600000	666.598
2	73600000	73700000	664.988
9	55000000	55100000	664.83
15	64700000	64800000	659.518
18	49600000	49700000	658.931
2	74100000	74200000	658.155
9	75600000	75700000	653.749
9	60800000	60900000	650.581
7	45000000	45100000	648.794
3	128300000	128400000	646.727
14	105300000	105400000	646.5
1	269800000	269900000	644.748
1	49100000	49200000	644.325
3	86900000	87000000	643.626
1	113600000	113700000	642.491
3	26100000	26200000	642.212
14	139600000	139700000	641.696
6	86300000	86400000	640.891
7	87000000	87100000	639.099
1	72500000	72600000	637.395
1	51500000	51600000	636.722
5	90900000	91000000	636.42
7	115100000	115200000	635.433
1	274900000	275000000	635.014
2	87200000	87300000	633.714
13	197900000	198000000	633.02
14	88600000	88700000	631.747
8	14400000	14500000	631.693
18	51200000	51300000	631.282
3	56000000	56100000	631.064
9	90200000	90300000	628.992
10	51300000	51400000	626.513
2	147900000	148000000	625.28
16	45300000	45400000	624.251
6	107300000	107400000	623.784
3	85900000	86000000	623.14
12	50100000	50200000	622.93
9	129700000	129800000	622.546
13	75200000	75300000	621.404
1	259600000	259700000	620.026
7	14100000	14200000	619.105
1	50400000	50500000	618.822
18	700000	800000	617.459
14	139700000	139800000	617.27
18	5400000	5500000	616.805
16	58600000	58700000	616.383
10	34900000	35000000	614.819
9	63600000	63700000	613.456
5	88100000	88200000	611.985
9	57800000	57900000	610.395
17	47800000	47900000	609.921
18	1500000	1600000	609.196
4	141300000	141400000	608.948
4	90700000	90800000	608.543
1	200600000	200700000	607.963
1	207900000	208000000	606.986
18	1200000	1300000	605.729
6	112700000	112800000	604.2
13	204300000	204400000	603.744
13	204200000	204300000	603.59
1	55100000	55200000	599.269
2	21300000	21400000	597.842
3	51700000	51800000	597.771
13	139700000	139800000	595.68
4	90600000	90700000	593.203
7	14000000	14100000	591.351
5	58600000	58700000	591.187
1	207700000	207800000	590.55
2	156600000	156700000	590.461
2	38400000	38500000	590.124
5	68600000	68700000	590.027
18	24000000	24100000	589.423
9	149700000	149800000	587.67
6	14700000	14800000	587.281
1	237700000	237800000	587.015
9	150300000	150400000	585.43
1	113500000	113600000	585.132
6	31300000	31400000	584.544
5	97500000	97600000	583.274
5	50400000	50500000	582.544
14	86400000	86500000	582.299
2	136000000	136100000	582.244
10	72000000	72100000	581.935
13	200800000	200900000	580.268
1	274800000	274900000	578.732
13	132000000	132100000	578.088
4	6400000	6500000	577.408
15	78200000	78300000	575.712
15	112800000	112900000	575.472
15	147400000	147500000	574.219
14	86000000	86100000	573.686
1	293800000	293900000	573.412
17	57400000	57500000	572.526
5	78500000	78600000	568.481
18	49900000	50000000	566.596
18	50800000	50900000	566.357
18	49200000	49300000	565.364
1	113400000	113500000	563.13
15	26400000	26500000	562.746
1	259500000	259600000	562.128
15	70200000	70300000	561.991
13	131900000	132000000	561.687
1	45700000	45800000	560.4
5	58700000	58800000	558.086
9	55300000	55400000	554.625
8	113900000	114000000	554.562
6	113000000	113100000	553.483
5	58100000	58200000	553.343
1	16800000	16900000	553.272
9	69300000	69400000	552.762
18	42500000	42600000	552.15
7	81400000	81500000	552.005
9	60900000	61000000	551.943
6	112900000	113000000	551.888
9	62900000	63000000	551.508
18	42400000	42500000	551.183
7	76600000	76700000	550.02
15	123900000	124000000	549.483
1	207800000	207900000	549.088
16	4100000	4200000	548.065
7	47600000	47700000	547.717
4	119600000	119700000	547.628
1	237300000	237400000	547.475
1	295700000	295800000	546.897
10	1900000	2000000	545.622
3	49500000	49600000	545.388
15	156100000	156200000	544.808
15	156000000	156100000	544.01
1	45600000	45700000	543.435
12	55400000	55500000	543.397
5	85800000	85900000	542.217
1	50600000	50700000	542.014
7	80400000	80500000	541.961
10	30700000	30800000	541.612
8	123700000	123800000	539.58
1	162500000	162600000	535.99
10	24200000	24300000	534.867
14	117300000	117400000	533.696
1	262800000	262900000	532.733
17	36000000	36100000	532.63
11	2600000	2700000	532.63
15	156300000	156400000	532.509
2	148200000	148300000	531.808
9	71300000	71400000	531.009
16	50600000	50700000	530.976
10	44500000	44600000	528.702
15	26200000	26300000	528.426
18	600000	700000	528.371
9	53400000	53500000	528.24
1	9200000	9300000	527.099
9	91800000	91900000	526.29
13	184600000	184700000	525.658
13	131500000	131600000	525.438
12	40300000	40400000	525.412
7	48000000	48100000	524.528
3	87200000	87300000	524.119
14	86500000	86600000	523.972
13	215500000	215600000	523.426
1	51700000	51800000	523.232
14	86700000	86800000	523.163
5	13800000	13900000	523.079
14	107100000	107200000	522.083
7	76700000	76800000	518.507
9	75500000	75600000	518.209
14	117200000	117300000	517.829
6	65600000	65700000	517.532
1	236900000	237000000	516.856
3	104200000	104300000	514.044
15	60800000	60900000	513.941
15	78000000	78100000	511.937
16	50100000	50200000	511.225
1	260700000	260800000	510.046
1	16700000	16800000	509.946
5	68700000	68800000	507.748
9	70100000	70200000	506.757
18	48300000	48400000	506.638
2	82000000	82100000	506.076
9	97600000	97700000	504.449
16	71500000	71600000	503.38
1	52100000	52200000	502.616
1	58100000	58200000	502.146
1	113800000	113900000	501.43
2	38000000	38100000	501.305
13	75300000	75400000	500.756
15	78800000	78900000	500.453
1	235400000	235500000	499.968
11	84200000	84300000	499.354
16	44700000	44800000	497.734
4	82500000	82600000	497.565
8	132600000	132700000	496.223
4	141700000	141800000	496.043
5	85900000	86000000	495.114
3	124300000	124400000	493.064
15	118300000	118400000	493.054
14	85700000	85800000	492.28
15	83600000	83700000	492.193
3	50600000	50700000	492.166
1	237400000	237500000	492.028
3	88800000	88900000	491.283
14	86100000	86200000	490.508
5	78100000	78200000	490.086
3	87800000	87900000	489.412
15	120300000	120400000	488.715
4	82600000	82700000	486.757
15	120500000	120600000	485.026

## Sheet: table S4
Table S4 Potential Candidate Regions Detected by iHH12
Chr	Start	End	iHH12
14	103900000	104000000	23.6396
14	103800000	103900000	23.5156
14	104000000	104100000	23.0477
14	103700000	103800000	22.5408
14	108800000	108900000	21.8034
14	108700000	108800000	20.8034
6	116000000	116100000	20.4965
14	108900000	109000000	19.83
14	108300000	108400000	19.7977
14	102500000	102600000	19.4399
14	108200000	108300000	19.3786
14	108400000	108500000	19.1754
6	115900000	116000000	19.056
6	117200000	117300000	18.8368
6	116100000	116200000	18.6663
6	117900000	118000000	18.4836
6	117100000	117200000	18.482
14	109000000	109100000	18.358
6	117400000	117500000	18.2251
14	82400000	82500000	18.1944
6	117300000	117400000	17.8585
6	117000000	117100000	17.7698
6	117700000	117800000	17.7317
14	108500000	108600000	17.6245
6	118000000	118100000	17.4788
14	82800000	82900000	17.4731
14	82300000	82400000	17.3561
14	109100000	109200000	17.2901
14	102600000	102700000	17.1448
14	108600000	108700000	17.1255
14	82700000	82800000	17.1127
9	102900000	103000000	17.0772
6	116600000	116700000	17.0106
6	115800000	115900000	16.8897
14	80000000	80100000	16.8743
14	80100000	80200000	16.8678
14	106400000	106500000	16.8281
14	82900000	83000000	16.7729
6	117500000	117600000	16.769
14	82600000	82700000	16.7236
14	107100000	107200000	16.6548
6	116200000	116300000	16.6389
14	80200000	80300000	16.5298
14	107000000	107100000	16.4855
14	106500000	106600000	16.3987
14	107200000	107300000	16.3874
14	80300000	80400000	16.3255
14	80400000	80500000	16.3046
14	80500000	80600000	16.2914
14	81100000	81200000	16.2725
14	80600000	80700000	16.2713
14	80700000	80800000	16.2709
14	81000000	81100000	16.2313
14	80800000	80900000	16.2087
14	80900000	81000000	16.1829
6	115700000	115800000	16.1154
14	106600000	106700000	16.0744
14	104100000	104200000	15.9812
14	102700000	102800000	15.9785
6	116900000	117000000	15.9473
14	83000000	83100000	15.874
6	116400000	116500000	15.7952
6	116700000	116800000	15.795
14	109200000	109300000	15.756
6	117800000	117900000	15.7505
6	116300000	116400000	15.6633
14	81200000	81300000	15.5943
14	81300000	81400000	15.5925
14	107300000	107400000	15.5921
14	81400000	81500000	15.5886
6	117600000	117700000	15.4756
14	83100000	83200000	15.4628
14	104200000	104300000	15.4611
9	103000000	103100000	15.4424
14	82500000	82600000	15.355
14	106700000	106800000	15.2487
14	106800000	106900000	15.2052
14	105100000	105200000	15.1603
14	105300000	105400000	15.1454
14	105200000	105300000	15.1293
14	104300000	104400000	15.0908
14	104400000	104500000	15.0781
14	104500000	104600000	15.0778
14	105400000	105500000	15.0482
6	116500000	116600000	15.0138
14	104600000	104700000	14.9946
14	104700000	104800000	14.9928
15	68200000	68300000	14.9919
14	81500000	81600000	14.9197
14	104800000	104900000	14.9166
14	104900000	105000000	14.9088
14	83200000	83300000	14.8775
14	105000000	105100000	14.8144
14	108100000	108200000	14.7939
14	103000000	103100000	14.7585
15	68300000	68400000	14.6115
14	105500000	105600000	14.577
15	68100000	68200000	14.5223
9	75400000	75500000	14.479
6	118100000	118200000	14.409
15	68400000	68500000	14.3252
14	106900000	107000000	14.3129
1	261600000	261700000	14.2982
1	261700000	261800000	14.2603
9	102800000	102900000	14.2593
6	116800000	116900000	14.2141
14	105600000	105700000	14.1877
1	261800000	261900000	14.0881
14	105900000	106000000	14.0781
14	82200000	82300000	14.0718
14	106000000	106100000	14.0683
14	83400000	83500000	13.9881
14	105700000	105800000	13.9591
15	68000000	68100000	13.9293
14	106100000	106200000	13.9031
14	105800000	105900000	13.8052
14	106200000	106300000	13.7904
14	83300000	83400000	13.7803
1	260500000	260600000	13.7634
1	261900000	262000000	13.7122
15	68500000	68600000	13.7
9	76900000	77000000	13.6027
6	115600000	115700000	13.5049
14	106300000	106400000	13.4597
11	31600000	31700000	13.3809
14	108000000	108100000	13.2154
14	102800000	102900000	13.1914
14	81600000	81700000	13.1165
14	107400000	107500000	13.0938
6	118200000	118300000	13.0403
14	109300000	109400000	12.9893
14	102900000	103000000	12.9322
14	83900000	84000000	12.9113
14	83500000	83600000	12.8517
9	103100000	103200000	12.7562
5	57700000	57800000	12.677
9	75500000	75600000	12.6648
4	106300000	106400000	12.629
14	82100000	82200000	12.5537
1	261000000	261100000	12.541
1	258500000	258600000	12.4453
4	106100000	106200000	12.4224
9	75600000	75700000	12.3939
14	103200000	103300000	12.3822
1	31600000	31700000	12.3545
9	102700000	102800000	12.2569
15	68600000	68700000	12.2548
1	261100000	261200000	12.2464
9	76800000	76900000	12.2452
14	84000000	84100000	12.0812
5	57800000	57900000	12.0726
4	90900000	91000000	12.0503
1	214000000	214100000	12.0261
14	83600000	83700000	12.0083
1	220600000	220700000	11.9627
4	106200000	106300000	11.9419
1	261500000	261600000	11.8505
14	103300000	103400000	11.8182
1	258600000	258700000	11.7296
1	260600000	260700000	11.7145
1	31500000	31600000	11.7078
9	77000000	77100000	11.6151
1	31700000	31800000	11.596
4	106400000	106500000	11.5759
1	262000000	262100000	11.5719
1	218300000	218400000	11.4402
1	213900000	214000000	11.4393
14	122600000	122700000	11.3935
11	31700000	31800000	11.3865
9	70300000	70400000	11.3378
1	261200000	261300000	11.2851
14	81700000	81800000	11.2473
14	116600000	116700000	11.216
14	117100000	117200000	11.1961
1	220800000	220900000	11.1724
1	258700000	258800000	11.1702
14	103400000	103500000	11.1483
14	107500000	107600000	11.1297
1	220700000	220800000	11.102
14	103100000	103200000	11.0637
14	101100000	101200000	11.0094
15	68700000	68800000	10.9584
1	214100000	214200000	10.905
4	106000000	106100000	10.8987
9	100400000	100500000	10.8781
1	261400000	261500000	10.8229
1	214300000	214400000	10.7828
14	116700000	116800000	10.7501
1	218500000	218600000	10.7418
1	261300000	261400000	10.7207
4	91000000	91100000	10.7163
18	25100000	25200000	10.6969
14	102400000	102500000	10.609
4	106500000	106600000	10.5697
6	118300000	118400000	10.563
14	83700000	83800000	10.5537
9	75700000	75800000	10.5343
14	122700000	122800000	10.5292
1	221100000	221200000	10.5014
14	109400000	109500000	10.4931
9	66100000	66200000	10.3923
9	75300000	75400000	10.383
15	68800000	68900000	10.3798
9	109200000	109300000	10.3764
1	218400000	218500000	10.3699
15	66900000	67000000	10.2784
1	220900000	221000000	10.2475
8	123100000	123200000	10.242
2	89800000	89900000	10.241
1	214400000	214500000	10.2363
1	213800000	213900000	10.2274
9	108500000	108600000	10.1494
5	57900000	58000000	10.1394
14	101000000	101100000	10.1247
1	113200000	113300000	10.1236
1	218600000	218700000	10.1124
14	82000000	82100000	10.0992
9	102600000	102700000	10.0908
1	214200000	214300000	10.0789
9	103200000	103300000	10.0117
14	81800000	81900000	10.0023
14	92000000	92100000	9.96765
6	118400000	118500000	9.93951
1	215700000	215800000	9.87103
9	90800000	90900000	9.77206
1	260400000	260500000	9.71095
9	90900000	91000000	9.70678
1	218200000	218300000	9.68743
14	91900000	92000000	9.67079
1	215500000	215600000	9.65707
9	91000000	91100000	9.64845
9	91100000	91200000	9.64824
1	262100000	262200000	9.64529
9	91400000	91500000	9.64106
9	89000000	89100000	9.62847
9	90200000	90300000	9.62797
15	70400000	70500000	9.62385
9	89100000	89200000	9.62306
9	89200000	89300000	9.61389
9	90300000	90400000	9.60179
9	89300000	89400000	9.60163
2	89700000	89800000	9.59592
9	89400000	89500000	9.59238
9	100500000	100600000	9.59159
9	90400000	90500000	9.58982
9	90500000	90600000	9.58759
14	116500000	116600000	9.58165
9	91500000	91600000	9.58161
9	91600000	91700000	9.57702
9	91200000	91300000	9.56864
9	91300000	91400000	9.56076
2	32400000	32500000	9.53624
1	258400000	258500000	9.53494
9	91700000	91800000	9.53405
9	90600000	90700000	9.52901
1	260700000	260800000	9.52134
9	89500000	89600000	9.52088
9	90700000	90800000	9.51022
9	92800000	92900000	9.5062
2	89600000	89700000	9.49796
1	215800000	215900000	9.49446
15	70700000	70800000	9.48876
9	91800000	91900000	9.48392
9	93400000	93500000	9.46964
9	89600000	89700000	9.46601
9	89700000	89800000	9.46456
9	91900000	92000000	9.43376
9	89900000	90000000	9.42827
2	32500000	32600000	9.4235
9	89800000	89900000	9.41865
9	90000000	90100000	9.41518
1	260900000	261000000	9.38903
1	113300000	113400000	9.38506
9	90100000	90200000	9.38158
5	58000000	58100000	9.33977
14	102100000	102200000	9.33732
9	92000000	92100000	9.33542
9	92100000	92200000	9.32593
1	215400000	215500000	9.31402
9	92200000	92300000	9.30743
11	33100000	33200000	9.29657
15	68900000	69000000	9.2951
9	92300000	92400000	9.28084
1	262200000	262300000	9.27122
9	92600000	92700000	9.26602
9	92700000	92800000	9.26491
9	92400000	92500000	9.26313
9	92500000	92600000	9.25677
4	106600000	106700000	9.24995
14	103600000	103700000	9.24729
11	33200000	33300000	9.24658
9	108600000	108700000	9.23454
4	90800000	90900000	9.13652
9	76400000	76500000	9.13415
9	70000000	70100000	9.13106
1	214500000	214600000	9.12582
1	216300000	216400000	9.12074
5	58100000	58200000	9.11209
3	86800000	86900000	9.04497
17	58100000	58200000	9.03716
9	92900000	93000000	9.03397
2	88900000	89000000	9.01975
14	107600000	107700000	9.01945
9	100800000	100900000	9.00884
1	222300000	222400000	8.99914
1	221000000	221100000	8.98624
2	88100000	88200000	8.9674
2	88800000	88900000	8.9615
14	116800000	116900000	8.95961
15	64400000	64500000	8.94478
9	101000000	101100000	8.92435
14	103500000	103600000	8.91362
15	66800000	66900000	8.90487
3	85700000	85800000	8.8998
2	88700000	88800000	8.89619
8	112200000	112300000	8.89336
2	87900000	88000000	8.89098
2	88000000	88100000	8.8895
11	33300000	33400000	8.8576
2	88500000	88600000	8.85568
1	221200000	221300000	8.85499
2	88600000	88700000	8.85379
9	102500000	102600000	8.84083
9	77100000	77200000	8.81575
14	83800000	83900000	8.79701
9	100900000	101000000	8.78304
8	112900000	113000000	8.77452
11	31500000	31600000	8.74809
9	76500000	76600000	8.73192
9	70100000	70200000	8.72943
9	76700000	76800000	8.70039
14	92100000	92200000	8.69942
1	216200000	216300000	8.69188
14	101200000	101300000	8.66929
2	33300000	33400000	8.63906
9	70400000	70500000	8.62636
2	86700000	86800000	8.62528
1	258800000	258900000	8.62055
1	260800000	260900000	8.6187
2	89000000	89100000	8.61342
1	233200000	233300000	8.60403
1	233000000	233100000	8.59018
2	89100000	89200000	8.56751
11	31800000	31900000	8.5592
15	67100000	67200000	8.55537
14	101700000	101800000	8.54757
15	67000000	67100000	8.54715
9	75800000	75900000	8.54619
8	113000000	113100000	8.53438
2	89900000	90000000	8.52713
2	88400000	88500000	8.52135
2	88300000	88400000	8.50967
2	89400000	89500000	8.50389
17	58000000	58100000	8.49374
1	222600000	222700000	8.49252
2	89200000	89300000	8.47759
1	222900000	223000000	8.44993
2	89300000	89400000	8.44873
2	88200000	88300000	8.44601
14	117200000	117300000	8.4446
1	215900000	216000000	8.41475
3	86900000	87000000	8.38905
2	89500000	89600000	8.3828
9	70200000	70300000	8.37615
4	91100000	91200000	8.3722
2	86800000	86900000	8.35878
18	25200000	25300000	8.34948
6	86600000	86700000	8.33264
14	101600000	101700000	8.31959
15	70500000	70600000	8.30454
11	31200000	31300000	8.27893
15	66600000	66700000	8.26877
6	119000000	119100000	8.25749
14	102200000	102300000	8.25401
8	110300000	110400000	8.23708
8	123200000	123300000	8.22956
8	112300000	112400000	8.22049
11	31400000	31500000	8.21139
15	70600000	70700000	8.17588
9	109300000	109400000	8.1715
9	93500000	93600000	8.16594
3	87000000	87100000	8.16535
1	100700000	100800000	8.1174
5	58200000	58300000	8.11027
5	49800000	49900000	8.06252
8	112600000	112700000	8.06157
9	88900000	89000000	8.0474
1	31800000	31900000	8.04271
1	262300000	262400000	8.04113
9	86100000	86200000	8.03233
9	86200000	86300000	8.02581
15	65800000	65900000	8.00727
9	87000000	87100000	7.98807
1	233100000	233200000	7.98572
13	173200000	173300000	7.98265
1	100600000	100700000	7.97952
1	211400000	211500000	7.97887
9	76600000	76700000	7.97869
15	70800000	70900000	7.96898
9	86300000	86400000	7.96726
4	90500000	90600000	7.96277
9	87100000	87200000	7.95471
18	25000000	25100000	7.94591
9	87200000	87300000	7.94402
9	87300000	87400000	7.94237
1	259100000	259200000	7.93786
13	139500000	139600000	7.9358
2	33400000	33500000	7.93071
2	31400000	31500000	7.91356
7	59400000	59500000	7.90517
9	86400000	86500000	7.87755
9	100600000	100700000	7.8724
9	86500000	86600000	7.86549
8	112500000	112600000	7.84193
1	216400000	216500000	7.83183
9	86600000	86700000	7.82561
9	87400000	87500000	7.82095
4	93100000	93200000	7.80611
14	91800000	91900000	7.7968
2	87200000	87300000	7.79038
6	118500000	118600000	7.77595
9	86700000	86800000	7.77512
6	86700000	86800000	7.77229
1	223900000	224000000	7.77007
9	85800000	85900000	7.76455
16	45000000	45100000	7.75743
8	112400000	112500000	7.75511
9	88800000	88900000	7.74936
9	86800000	86900000	7.74837
9	108700000	108800000	7.74312
9	86000000	86100000	7.74176
15	62900000	63000000	7.73443
15	67900000	68000000	7.73126
9	86900000	87000000	7.71575
10	30700000	30800000	7.71224
3	85600000	85700000	7.71092
9	85900000	86000000	7.70816
2	86000000	86100000	7.69713
9	87500000	87600000	7.68376
9	109100000	109200000	7.6711
15	67200000	67300000	7.6705
1	153300000	153400000	7.65151
4	90600000	90700000	7.64978
8	112100000	112200000	7.64824
3	108100000	108200000	7.64606
8	113100000	113200000	7.6136
15	67300000	67400000	7.60801
4	106700000	106800000	7.60678
2	90000000	90100000	7.59522
14	102300000	102400000	7.59429
9	139700000	139800000	7.58151
9	87600000	87700000	7.57629
16	39600000	39700000	7.57323
1	228900000	229000000	7.57282
9	87700000	87800000	7.57051
1	228800000	228900000	7.56064
17	58300000	58400000	7.55309
9	70500000	70600000	7.54596
3	87100000	87200000	7.54536
1	222800000	222900000	7.54517
3	86700000	86800000	7.54182
14	109500000	109600000	7.52332
14	107800000	107900000	7.51768
14	100300000	100400000	7.48792
11	32200000	32300000	7.4798
9	139800000	139900000	7.47961
14	101800000	101900000	7.47882
8	112700000	112800000	7.46894
9	108400000	108500000	7.46753
3	85800000	85900000	7.4601
9	101100000	101200000	7.44734
9	87800000	87900000	7.44616
9	93300000	93400000	7.44541
9	87900000	88000000	7.44484
1	215600000	215700000	7.43744
9	101200000	101300000	7.41946
9	88000000	88100000	7.41734
9	88100000	88200000	7.39426
9	88200000	88300000	7.3858
1	214600000	214700000	7.38463
9	88300000	88400000	7.37998
1	218700000	218800000	7.37972
2	35900000	36000000	7.37521
2	87300000	87400000	7.34617
8	112800000	112900000	7.34177
11	32000000	32100000	7.33935
3	108200000	108300000	7.33741
9	88400000	88500000	7.33023
9	88500000	88600000	7.32565
18	25300000	25400000	7.32556
9	88600000	88700000	7.3247
9	88700000	88800000	7.32433
2	31500000	31600000	7.3214
4	90700000	90800000	7.3204
2	36000000	36100000	7.30501
8	112000000	112100000	7.30155
15	65900000	66000000	7.29158
1	113100000	113200000	7.28502
2	33200000	33300000	7.27857
1	113400000	113500000	7.27807
6	119100000	119200000	7.2644
3	23300000	23400000	7.26388
14	121400000	121500000	7.26228
1	80000000	80100000	7.25979
8	111700000	111800000	7.25408
8	123300000	123400000	7.25255
15	66700000	66800000	7.24529
1	100800000	100900000	7.24161
1	220500000	220600000	7.23409
9	63700000	63800000	7.21538
15	65600000	65700000	7.21098
14	100200000	100300000	7.2097
1	224100000	224200000	7.20458
1	257700000	257800000	7.19604
1	232900000	233000000	7.18366
9	94100000	94200000	7.1712
1	224000000	224100000	7.16799
6	98700000	98800000	7.16347
9	93000000	93100000	7.15796
14	101900000	102000000	7.14517
9	108900000	109000000	7.13688
2	24200000	24300000	7.1224
15	76200000	76300000	7.12113
5	55200000	55300000	7.11861
2	32600000	32700000	7.09785
15	65700000	65800000	7.09613
8	110400000	110500000	7.06921
2	71300000	71400000	7.06761
11	32300000	32400000	7.06535
5	61400000	61500000	7.06108
15	65500000	65600000	7.06056
5	97300000	97400000	7.05944
1	79700000	79800000	7.0578
1	153200000	153300000	7.04638
1	222500000	222600000	7.04585
1	259200000	259300000	7.04144
2	70900000	71000000	7.03784
11	33400000	33500000	7.03518
9	100700000	100800000	7.02706
13	173300000	173400000	7.0139
10	30800000	30900000	7.01354
7	34200000	34300000	7.01292
4	90400000	90500000	7.00743
5	49900000	50000000	6.98579
7	14000000	14100000	6.98071
14	107700000	107800000	6.974
2	71200000	71300000	6.97023
14	102000000	102100000	6.96968
7	59700000	59800000	6.95751
11	31300000	31400000	6.94617
11	31900000	32000000	6.9326
1	258900000	259000000	6.92255
15	77000000	77100000	6.91705
4	39800000	39900000	6.91431
3	86600000	86700000	6.90684
9	77200000	77300000	6.89965
9	109400000	109500000	6.88524
3	87600000	87700000	6.87971
7	34100000	34200000	6.87691
1	222400000	222500000	6.8746
1	210000000	210100000	6.87331
9	108800000	108900000	6.87097
14	101400000	101500000	6.86393
11	31100000	31200000	6.85731
2	33500000	33600000	6.84927
8	91000000	91100000	6.8308
6	112200000	112300000	6.82821
4	91700000	91800000	6.82682
18	25400000	25500000	6.82675
9	93600000	93700000	6.81471
14	81900000	82000000	6.809
14	122000000	122100000	6.80744
3	87200000	87300000	6.80086
5	58300000	58400000	6.79987
1	229000000	229100000	6.79889
1	262400000	262500000	6.79356
6	98800000	98900000	6.78178
1	233300000	233400000	6.77804
15	69000000	69100000	6.776
16	39700000	39800000	6.76902
5	49700000	49800000	6.76789
1	292800000	292900000	6.76692
14	117300000	117400000	6.7603
10	30600000	30700000	6.76025
14	116400000	116500000	6.75482
1	265700000	265800000	6.75203
9	95400000	95500000	6.74269
1	222700000	222800000	6.737
1	221300000	221400000	6.73401
15	66000000	66100000	6.73308
14	116300000	116400000	6.7237
1	119700000	119800000	6.72239
5	6100000	6200000	6.70121
1	49100000	49200000	6.69866
9	95300000	95400000	6.68566
8	109000000	109100000	6.68431
10	31200000	31300000	6.682
17	58200000	58300000	6.67704
9	96800000	96900000	6.67668
9	103300000	103400000	6.66008
9	94500000	94600000	6.65724
8	111800000	111900000	6.64844
2	86900000	87000000	6.64611
14	115200000	115300000	6.64493
3	109400000	109500000	6.6413
14	92200000	92300000	6.62564
2	87800000	87900000	6.62454
6	111900000	112000000	6.61771
9	97000000	97100000	6.61471
14	115400000	115500000	6.61375
1	245500000	245600000	6.61236
8	109100000	109200000	6.61168
8	110700000	110800000	6.60985
4	46300000	46400000	6.60539
11	31000000	31100000	6.6002
2	85600000	85700000	6.5949
8	113400000	113500000	6.59229
5	97400000	97500000	6.57494
1	223000000	223100000	6.57169
14	76000000	76100000	6.56315
1	232800000	232900000	6.55945
3	109500000	109600000	6.55518
1	265600000	265700000	6.55316
3	109300000	109400000	6.55212
9	96900000	97000000	6.54671
1	257600000	257700000	6.5406
1	79900000	80000000	6.53576
14	121300000	121400000	6.53467
1	49000000	49100000	6.53451
13	173100000	173200000	6.53168
9	85200000	85300000	6.53057
1	99100000	99200000	6.52683
3	108700000	108800000	6.52566
1	211500000	211600000	6.51938
3	23400000	23500000	6.51488
3	108300000	108400000	6.5117
3	108400000	108500000	6.5098
4	106800000	106900000	6.50545
14	101500000	101600000	6.49403
7	34300000	34400000	6.4878
16	39800000	39900000	6.48366
1	31900000	32000000	6.46487
3	108800000	108900000	6.45477
9	94400000	94500000	6.45395
1	259000000	259100000	6.45333
2	156400000	156500000	6.45267
9	85300000	85400000	6.4513
9	85400000	85500000	6.44812
9	94300000	94400000	6.44375
15	112800000	112900000	6.44045
15	67400000	67500000	6.43743
9	85700000	85800000	6.42992
3	108500000	108600000	6.42567
9	85500000	85600000	6.42368
1	216500000	216600000	6.42258
3	108900000	109000000	6.42203
2	87100000	87200000	6.4218
8	111900000	112000000	6.42161
3	109000000	109100000	6.42088
9	63800000	63900000	6.42056
16	45100000	45200000	6.42015
1	94100000	94200000	6.41906
3	108600000	108700000	6.41885
9	94200000	94300000	6.41885
9	85600000	85700000	6.41505
3	109100000	109200000	6.4139
3	109200000	109300000	6.41328
16	56900000	57000000	6.41212
15	64700000	64800000	6.40601
16	57000000	57100000	6.39556
2	66300000	66400000	6.38891
5	6200000	6300000	6.38492
9	62800000	62900000	6.379
1	221900000	222000000	6.37491
2	71400000	71500000	6.37367
15	64500000	64600000	6.37304
1	265800000	265900000	6.37251
7	14100000	14200000	6.36705
1	151800000	151900000	6.36327
1	114000000	114100000	6.36038
3	109700000	109800000	6.35808
15	62100000	62200000	6.35396
3	109600000	109700000	6.34834
9	75900000	76000000	6.34431
1	94200000	94300000	6.34281
9	94600000	94700000	6.34235
9	85100000	85200000	6.3241
2	66200000	66300000	6.32158
1	232700000	232800000	6.3079
9	94700000	94800000	6.29913
1	94300000	94400000	6.29888
9	94800000	94900000	6.29347
9	95500000	95600000	6.2915
9	94900000	95000000	6.28546
13	173000000	173100000	6.2836
1	94400000	94500000	6.28323
2	35800000	35900000	6.28311
3	86500000	86600000	6.27934
3	110200000	110300000	6.27906
9	95000000	95100000	6.27778
2	36100000	36200000	6.27439
15	74400000	74500000	6.27217
9	95100000	95200000	6.27212
1	151500000	151600000	6.26715
1	79800000	79900000	6.267
3	23500000	23600000	6.26172
1	78600000	78700000	6.25741
1	153400000	153500000	6.2573
9	100300000	100400000	6.25454
11	30900000	31000000	6.25245
6	108900000	109000000	6.25209
1	210200000	210300000	6.2508
1	209100000	209200000	6.24698
1	113900000	114000000	6.24372
9	77500000	77600000	6.24147
1	224200000	224300000	6.2384
15	75700000	75800000	6.233
12	44800000	44900000	6.2317
5	38400000	38500000	6.22678
2	147700000	147800000	6.22163
1	93200000	93300000	6.21527
11	32700000	32800000	6.20813
14	121500000	121600000	6.20701
8	113300000	113400000	6.20579
1	217400000	217500000	6.20511
1	222000000	222100000	6.20071
14	101300000	101400000	6.19862
6	109000000	109100000	6.19381
2	156300000	156400000	6.19255
17	58500000	58600000	6.19195
4	105900000	106000000	6.18954
8	110600000	110700000	6.18946
1	55100000	55200000	6.18727
9	95200000	95300000	6.17821
2	32700000	32800000	6.17164
11	32100000	32200000	6.17112
9	70800000	70900000	6.17003
9	107600000	107700000	6.16836
8	113200000	113300000	6.16834
1	221800000	221900000	6.16747
1	218800000	218900000	6.16722
4	93200000	93300000	6.16651
7	32600000	32700000	6.14802
9	70700000	70800000	6.14098
1	216000000	216100000	6.1365
1	93300000	93400000	6.13295
3	87700000	87800000	6.1275
8	110800000	110900000	6.11456
8	90300000	90400000	6.10736
5	80000000	80100000	6.10632
3	87800000	87900000	6.10217
6	111800000	111900000	6.10202
1	93400000	93500000	6.10166
3	87300000	87400000	6.10093
13	139600000	139700000	6.0989
11	32400000	32500000	6.09699
14	100900000	101000000	6.093
9	64500000	64600000	6.08799
7	32700000	32800000	6.08745
3	109800000	109900000	6.08204
1	231800000	231900000	6.07426
7	32800000	32900000	6.07367
6	118900000	119000000	6.07223
2	36400000	36500000	6.06628
7	33000000	33100000	6.06111
7	32900000	33000000	6.0607
5	38000000	38100000	6.05765
15	70300000	70400000	6.05706
1	113500000	113600000	6.0564
15	66100000	66200000	6.05507
10	30300000	30400000	6.05472
7	59500000	59600000	6.04929
1	95400000	95500000	6.04894
1	93500000	93600000	6.04832
7	33100000	33200000	6.04737
1	119600000	119700000	6.0371
1	101000000	101100000	6.0336
14	75900000	76000000	6.03234
1	244600000	244700000	6.02509
15	73400000	73500000	6.02094
14	100400000	100500000	6.01835
3	85900000	86000000	6.01781
1	93800000	93900000	6.01009
15	66500000	66600000	6.00961
1	93900000	94000000	6.00298
7	33200000	33300000	6.00228
1	93600000	93700000	5.99898
1	93700000	93800000	5.99749
5	59100000	59200000	5.99704
15	64600000	64700000	5.99622
4	91200000	91300000	5.9957
1	119800000	119900000	5.99103
1	94000000	94100000	5.98816
2	71100000	71200000	5.98816
1	113700000	113800000	5.98709
1	228200000	228300000	5.98706
7	33300000	33400000	5.97962
1	113800000	113900000	5.97938
15	124500000	124600000	5.97598
1	232300000	232400000	5.97578
7	33400000	33500000	5.97574
15	71600000	71700000	5.9748
7	33500000	33600000	5.97429
1	55200000	55300000	5.97347
7	33600000	33700000	5.97045
4	106900000	107000000	5.9605
9	75200000	75300000	5.95853
2	85700000	85800000	5.95829
7	33700000	33800000	5.95452
7	33800000	33900000	5.95419
9	139900000	140000000	5.95255
7	33900000	34000000	5.94737
1	221600000	221700000	5.94473
3	86400000	86500000	5.92863
2	66400000	66500000	5.92696
9	109500000	109600000	5.92564
6	119200000	119300000	5.92014
5	80700000	80800000	5.91433
3	87500000	87600000	5.91263
7	34000000	34100000	5.90852
1	99200000	99300000	5.90804
1	228400000	228500000	5.90286
15	69100000	69200000	5.90203
14	121700000	121800000	5.90122
15	74300000	74400000	5.89749
2	85900000	86000000	5.89655
3	110300000	110400000	5.8904
15	73300000	73400000	5.89009
5	97200000	97300000	5.884
14	100700000	100800000	5.87646
6	108800000	108900000	5.87552
5	50000000	50100000	5.86788
2	68900000	69000000	5.86516
14	109700000	109800000	5.86466
6	86800000	86900000	5.86295
17	58400000	58500000	5.85854
1	78700000	78800000	5.85811
14	115300000	115400000	5.83252
1	232000000	232100000	5.82494
8	111000000	111100000	5.82196
1	211600000	211700000	5.81464
16	45200000	45300000	5.81259
4	93000000	93100000	5.8111
14	100500000	100600000	5.81056
1	232600000	232700000	5.80654
14	107900000	108000000	5.79163
16	51100000	51200000	5.78978
9	97100000	97200000	5.789
14	118700000	118800000	5.78528
11	32600000	32700000	5.78434
14	92300000	92400000	5.77637
2	66600000	66700000	5.77309
9	70600000	70700000	5.76386
2	33800000	33900000	5.76327
1	233400000	233500000	5.75713
1	210100000	210200000	5.75127
5	40100000	40200000	5.7389
13	200900000	201000000	5.73257
1	209000000	209100000	5.72969
1	78800000	78900000	5.72642
1	259300000	259400000	5.72348
2	36200000	36300000	5.72305
14	34400000	34500000	5.7222
2	71000000	71100000	5.71852
3	23600000	23700000	5.71738
5	55100000	55200000	5.71425
13	111400000	111500000	5.69592
1	94500000	94600000	5.69461
1	153500000	153600000	5.6946
1	217300000	217400000	5.69202
1	209200000	209300000	5.66849
1	245400000	245500000	5.66712
8	108800000	108900000	5.66113
2	86100000	86200000	5.65956
15	124400000	124500000	5.65921
8	110500000	110600000	5.65063
10	30500000	30600000	5.65032
5	54900000	55000000	5.64748
1	151600000	151700000	5.63922
13	158300000	158400000	5.63601
6	107300000	107400000	5.63274
14	122500000	122600000	5.63203
5	53200000	53300000	5.63144
1	264000000	264100000	5.62689
1	114100000	114200000	5.62462
14	32200000	32300000	5.61775
1	239300000	239400000	5.61002
1	232200000	232300000	5.60532
3	110100000	110200000	5.60442
9	93900000	94000000	5.60371
9	94000000	94100000	5.60342
1	233800000	233900000	5.59873
6	112100000	112200000	5.59863
1	216100000	216200000	5.59583
1	55300000	55400000	5.58749
5	56500000	56600000	5.58489
3	101600000	101700000	5.58464
1	232400000	232500000	5.58225
15	112900000	113000000	5.57812
9	64400000	64500000	5.57099
2	87400000	87500000	5.5683
13	161500000	161600000	5.56058
2	33000000	33100000	5.55933
5	38100000	38200000	5.55793
1	232100000	232200000	5.5571
7	73400000	73500000	5.54814
2	31600000	31700000	5.54788
18	42300000	42400000	5.54717
2	69000000	69100000	5.54499
1	228500000	228600000	5.54405
5	55300000	55400000	5.53634
1	211300000	211400000	5.53429
8	90400000	90500000	5.53354
4	91800000	91900000	5.5328
5	70000000	70100000	5.53243
8	111200000	111300000	5.52928
14	75800000	75900000	5.52476
15	63000000	63100000	5.52191
15	69900000	70000000	5.51885
15	102400000	102500000	5.51665
1	49200000	49300000	5.51534
2	31700000	31800000	5.50723
15	70900000	71000000	5.50387
1	94600000	94700000	5.50304
5	56400000	56500000	5.50223
6	119700000	119800000	5.50018
9	66000000	66100000	5.4998
7	65100000	65200000	5.49455
15	73100000	73200000	5.49302
1	217500000	217600000	5.4922
9	93200000	93300000	5.48724
1	221500000	221600000	5.48114
15	61300000	61400000	5.47957
8	111100000	111200000	5.47855
14	76100000	76200000	5.47253
16	39900000	40000000	5.46673
17	57900000	58000000	5.46579
3	109900000	110000000	5.46462
2	66500000	66600000	5.46274
1	245600000	245700000	5.46084
8	110200000	110300000	5.46061
9	93100000	93200000	5.45767
5	35500000	35600000	5.45418
1	100900000	101000000	5.44935
2	52700000	52800000	5.4471
15	77100000	77200000	5.44228
14	34500000	34600000	5.44208
2	32900000	33000000	5.44171
5	38200000	38300000	5.43757
4	108900000	109000000	5.43057
14	116900000	117000000	5.42829
14	88400000	88500000	5.4275
6	118600000	118700000	5.42662
8	108900000	109000000	5.42199
16	57100000	57200000	5.4195
15	76300000	76400000	5.41708
1	147400000	147500000	5.4129
15	66200000	66300000	5.40836
1	153100000	153200000	5.40722
14	118800000	118900000	5.39347
13	105800000	105900000	5.39089
1	61300000	61400000	5.38881
1	232500000	232600000	5.38833
15	74800000	74900000	5.38562
6	86900000	87000000	5.37469
15	63200000	63300000	5.34601
1	244700000	244800000	5.34238
9	64600000	64700000	5.33786
9	63900000	64000000	5.33761
16	52700000	52800000	5.33466
2	156600000	156700000	5.3286
1	78900000	79000000	5.32839
11	39000000	39100000	5.32834
5	38300000	38400000	5.32629
1	233700000	233800000	5.32507
8	113500000	113600000	5.32209
2	141800000	141900000	5.32075
2	33900000	34000000	5.31703
2	37800000	37900000	5.31182
6	65400000	65500000	5.31103
14	32100000	32200000	5.31039
3	25900000	26000000	5.30639
1	211700000	211800000	5.30408
13	139700000	139800000	5.30206
15	62600000	62700000	5.29731
11	32500000	32600000	5.29024
6	85300000	85400000	5.28829
8	123400000	123500000	5.286
7	48800000	48900000	5.28526
13	213800000	213900000	5.26881
1	222200000	222300000	5.26743
16	39500000	39600000	5.26657
2	31900000	32000000	5.26523
13	200800000	200900000	5.26473
5	58600000	58700000	5.26246
14	121900000	122000000	5.25811
1	263900000	264000000	5.25726
16	51200000	51300000	5.25668
9	77600000	77700000	5.25665
2	24300000	24400000	5.25558
2	36300000	36400000	5.25206
1	258000000	258100000	5.24668
14	34600000	34700000	5.23665
4	108700000	108800000	5.23253
5	53300000	53400000	5.22845
9	97200000	97300000	5.22566
13	161600000	161700000	5.21664
6	64700000	64800000	5.21499
15	102600000	102700000	5.2135
5	37900000	38000000	5.20877
1	228300000	228400000	5.20847
9	73200000	73300000	5.20296
9	63600000	63700000	5.20204
2	31800000	31900000	5.1998
15	71500000	71600000	5.19661
9	93700000	93800000	5.18959
4	46200000	46300000	5.18881
1	297300000	297400000	5.18769
5	56600000	56700000	5.18074
18	42400000	42500000	5.17841
3	23700000	23800000	5.17604
13	173400000	173500000	5.17333
13	105700000	105800000	5.17321
2	36500000	36600000	5.16647
1	211800000	211900000	5.15256
1	61200000	61300000	5.14951
2	71500000	71600000	5.14412
9	95600000	95700000	5.14144
1	263800000	263900000	5.14138
6	64800000	64900000	5.13946
7	59900000	60000000	5.13657
8	91100000	91200000	5.13617
14	32300000	32400000	5.13594
8	110900000	111000000	5.12924
10	30900000	31000000	5.12628
14	115500000	115600000	5.12458
1	241000000	241100000	5.11908
7	126600000	126700000	5.11805
2	156700000	156800000	5.11704
2	90100000	90200000	5.11399
5	43100000	43200000	5.11337
9	65800000	65900000	5.10909
9	65600000	65700000	5.10212
6	99600000	99700000	5.10131
10	31300000	31400000	5.09991
4	74700000	74800000	5.09643
5	40600000	40700000	5.09103
8	90600000	90700000	5.09078
7	63400000	63500000	5.08849
1	258200000	258300000	5.08676
15	64800000	64900000	5.08209
15	124600000	124700000	5.08041
15	69200000	69300000	5.07991
1	265900000	266000000	5.07812
14	121200000	121300000	5.07538
13	173500000	173600000	5.07528
10	30400000	30500000	5.0726
6	108400000	108500000	5.0716
15	64300000	64400000	5.06994
13	166800000	166900000	5.05973
16	57300000	57400000	5.05891
1	128300000	128400000	5.05754
7	59600000	59700000	5.0562
9	107700000	107800000	5.0538
2	58600000	58700000	5.04708
5	6300000	6400000	5.04203
6	119600000	119700000	5.04134
1	223100000	223200000	5.04108
2	31300000	31400000	5.0389
2	60500000	60600000	5.03694
3	87400000	87500000	5.03409
2	60400000	60500000	5.02967
4	93300000	93400000	5.02689
18	25500000	25600000	5.02273
2	87000000	87100000	5.02087
13	136100000	136200000	5.01947
1	217600000	217700000	5.01494
1	113600000	113700000	5.01454
14	122100000	122200000	5.01102
1	258100000	258200000	5.00679
1	151700000	151800000	5.00602
15	76900000	77000000	5.00585
14	35700000	35800000	5.00391
1	218900000	219000000	5.00139
15	77200000	77300000	5.00007
1	108200000	108300000	4.99967
1	245100000	245200000	4.99896
8	123000000	123100000	4.99621
9	139600000	139700000	4.99044
9	65700000	65800000	4.99011
2	90600000	90700000	4.9884
5	58400000	58500000	4.98764
5	97900000	98000000	4.98732
14	84100000	84200000	4.98658
15	63100000	63200000	4.98616
4	39900000	40000000	4.98409
1	243800000	243900000	4.98126
14	84200000	84300000	4.97675
14	84300000	84400000	4.97279
14	84400000	84500000	4.9725
14	84500000	84600000	4.97234
9	101900000	102000000	4.97152
6	98900000	99000000	4.97061
14	117000000	117100000	4.96822
14	70700000	70800000	4.96624
1	228600000	228700000	4.96544
6	112000000	112100000	4.96226
1	78500000	78600000	4.95829
3	101700000	101800000	4.95609
6	120200000	120300000	4.9535
5	49100000	49200000	4.95008
7	59800000	59900000	4.94696
6	87000000	87100000	4.9462
1	125800000	125900000	4.94562
1	255800000	255900000	4.94401
15	67700000	67800000	4.94298
1	99000000	99100000	4.94044
6	85400000	85500000	4.93973
1	218100000	218200000	4.93414
10	31000000	31100000	4.92807
4	91900000	92000000	4.91944
2	142100000	142200000	4.91879
13	117600000	117700000	4.91845
6	64600000	64700000	4.9085
1	80100000	80200000	4.90828
1	221700000	221800000	4.90282
13	166900000	167000000	4.90165
14	38100000	38200000	4.90047
1	61400000	61500000	4.89765
1	222100000	222200000	4.89629
1	55400000	55500000	4.89595
4	107300000	107400000	4.89415
1	61500000	61600000	4.89235
15	75800000	75900000	4.8918
7	88000000	88100000	4.8912
1	264700000	264800000	4.89021
11	32800000	32900000	4.88384
15	124700000	124800000	4.88103
2	37900000	38000000	4.87516
3	104100000	104200000	4.87321
14	84600000	84700000	4.87238
5	38500000	38600000	4.86929
13	62700000	62800000	4.86675
5	50700000	50800000	4.86653
1	297400000	297500000	4.8654
1	112800000	112900000	4.86417
18	54300000	54400000	4.85011
5	56300000	56400000	4.84571
14	115100000	115200000	4.84479
16	45300000	45400000	4.84039
12	44900000	45000000	4.83289
2	156500000	156600000	4.82605
15	121200000	121300000	4.82565
15	70200000	70300000	4.82484
11	33500000	33600000	4.82286
6	120100000	120200000	4.81409
2	21200000	21300000	4.81309
4	108400000	108500000	4.81254
15	60700000	60800000	4.81103
15	70000000	70100000	4.80936
1	231900000	232000000	4.80669
5	90600000	90700000	4.80624
4	109000000	109100000	4.79972
13	161700000	161800000	4.79885
9	77300000	77400000	4.79455
14	38000000	38100000	4.79328
1	229100000	229200000	4.79225
15	124800000	124900000	4.78969
1	119900000	120000000	4.78835
7	63500000	63600000	4.78679
5	69300000	69400000	4.7851
17	58700000	58800000	4.78246
3	84900000	85000000	4.78086
1	240200000	240300000	4.77532
3	38000000	38100000	4.77474
2	66700000	66800000	4.76623
15	66400000	66500000	4.76578
3	88000000	88100000	4.76562
1	298200000	298300000	4.76411
6	64500000	64600000	4.76264
1	127900000	128000000	4.76192
5	90500000	90600000	4.76146
18	42500000	42600000	4.76066
8	89000000	89100000	4.7599
1	221400000	221500000	4.75962
2	58700000	58800000	4.75581
5	69900000	70000000	4.75528
15	73600000	73700000	4.75437
6	79000000	79100000	4.7513
17	58600000	58700000	4.75098
7	32500000	32600000	4.75096
5	55000000	55100000	4.75069
18	24700000	24800000	4.75044
4	46400000	46500000	4.74805
5	50800000	50900000	4.747
1	240300000	240400000	4.74622
2	141900000	142000000	4.74414
9	70900000	71000000	4.74377
1	245200000	245300000	4.74161
6	77500000	77600000	4.73708
6	108700000	108800000	4.7337
15	67500000	67600000	4.73207
3	87900000	88000000	4.73151
15	76800000	76900000	4.73066
6	65500000	65600000	4.72946
5	61300000	61400000	4.72654
8	91200000	91300000	4.72638
11	33700000	33800000	4.71824
18	19400000	19500000	4.71737
14	32000000	32100000	4.71675
13	132700000	132800000	4.7154
6	118800000	118900000	4.71481
15	70100000	70200000	4.7139
13	158400000	158500000	4.71374
2	33600000	33700000	4.71309
1	262500000	262600000	4.71302
12	25500000	25600000	4.70563
2	69100000	69200000	4.70199
7	79300000	79400000	4.69327
1	245300000	245400000	4.69307
14	100600000	100700000	4.69287
1	239400000	239500000	4.69234
7	59300000	59400000	4.69006
13	135200000	135300000	4.68531
9	60800000	60900000	4.68372

## Sheet: table S5
Table S5 Candidate Regions Identified by More Than Two Methods
Chr	Start	End	Methods	Values
1	9200000	9300000	di,CLR	1.50249795620729,527.09941187
1	16700000	16800000	di,CLR	1.54726040237733,509.9457478
1	16800000	16900000	di,CLR	2.46153536738868,553.27175078
1	49100000	49200000	CLR,iHH12	644.32523276,6.69865820501596
1	49200000	49300000	CLR,iHH12	1433.05248893,5.51534431973829
1	51500000	51600000	di,CLR	1.84095836938051,636.72188521
1	51600000	51700000	di,CLR	1.98401217482076,1638.06439491
1	51800000	51900000	di,CLR	1.77836785589151,812.64871004
1	55100000	55200000	CLR,iHH12	599.26883514,6.18726931725698
1	55200000	55300000	CLR,iHH12	1160.84706262,5.97347408241062
1	55300000	55400000	CLR,iHH12	1857.79334268,5.58748831900081
1	55400000	55500000	CLR,iHH12	2086.18408755,4.89594700706447
1	72500000	72600000	di,CLR	2.05804403159252,637.39546431
1	78500000	78600000	di,iHH12	1.77394394171426,4.95828699219851
1	78900000	79000000	di,iHH12	2.66306088584811,5.32838507459662
1	93900000	94000000	di,iHH12	1.71982298745401,6.0029849093996
1	113400000	113500000	CLR,iHH12	563.1300528,7.27807000312428
1	113500000	113600000	CLR,iHH12	585.1324616,6.05639646292349
1	113600000	113700000	CLR,iHH12	642.49055553,5.014537346998
1	113700000	113800000	CLR,iHH12	701.54051869,5.98709001797437
1	113800000	113900000	CLR,iHH12	501.43005945,5.97938340395001
1	113900000	114000000	CLR,iHH12	753.23954447,6.24372026498538
1	114000000	114100000	CLR,iHH12	866.88415554,6.36037913477906
1	114100000	114200000	CLR,iHH12	987.90480419,5.62462456533067
1	119600000	119700000	di,iHH12	1.52064227214803,6.03709965187894
1	147400000	147500000	di,iHH12	2.43194333560756,5.41289597913801
1	151700000	151800000	di,iHH12	1.96743959737416,5.00602016232001
1	151800000	151900000	di,iHH12	3.28051935629614,6.36327210673618
1	153100000	153200000	di,iHH12	3.23364577200802,5.4072223598847
1	153200000	153300000	di,iHH12	2.24504886913504,7.04638475833808
1	153400000	153500000	di,iHH12	3.25920791389916,6.25729801152428
1	153500000	153600000	di,iHH12	3.33131321141405,5.69460337303396
1	207600000	207700000	di,CLR	1.931730320816,1045.63812652
1	223100000	223200000	di,iHH12	1.93553262378426,5.04107562286329
1	223900000	224000000	di,iHH12	1.43840627197289,7.77006829309839
1	233400000	233500000	di,iHH12	1.43783495276896,5.75713016021192
1	235300000	235400000	di,CLR	1.94184713094282,711.2846883
1	235600000	235700000	di,CLR	4.77333634565852,1740.05745163
1	235700000	235800000	di,CLR	1.62388311508249,1277.03994088
1	236100000	236200000	di,CLR	4.01075847338428,1085.73205523
1	237600000	237700000	di,CLR	1.76054937329044,858.15627411
1	240200000	240300000	di,iHH12	1.51325999248596,4.77532129531987
1	260700000	260800000	CLR,iHH12	510.04589603,9.52134320954351
1	260800000	260900000	CLR,iHH12	1514.3878427,8.61870145467069
1	260800000	260900000	di,CLR	1.81465018430055,1514.3878427
1	260800000	260900000	di,iHH12	1.81465018430055,8.61870145467069
1	261000000	261100000	CLR,iHH12	1854.6045261,12.5409872496364
1	261100000	261200000	CLR,iHH12	3051.58204061,12.2464156903661
1	261200000	261300000	CLR,iHH12	3630.10657784,11.2850637571655
1	261200000	261300000	di,CLR	1.45505419598105,3630.10657784
1	261200000	261300000	di,iHH12	1.45505419598105,11.2850637571655
1	261300000	261400000	CLR,iHH12	3823.28892185,10.7207228620633
1	261400000	261500000	CLR,iHH12	4619.74182714,10.8228733428656
1	261500000	261600000	CLR,iHH12	4885.97132164,11.8504746330542
1	261600000	261700000	CLR,iHH12	5214.84853468,14.2981915798646
1	261700000	261800000	CLR,iHH12	5034.15644553,14.26033283847
1	261800000	261900000	CLR,iHH12	5125.174256,14.0880987725415
1	261800000	261900000	di,CLR	1.91393137604047,5125.174256
1	261800000	261900000	di,iHH12	1.91393137604047,14.0880987725415
1	261900000	262000000	CLR,iHH12	4988.57241654,13.7121723923662
1	262000000	262100000	CLR,iHH12	4730.01395791,11.5719355833168
1	262100000	262200000	CLR,iHH12	4626.84418729,9.64528895813342
1	262200000	262300000	CLR,iHH12	4231.93393415,9.27122229902092
1	262300000	262400000	CLR,iHH12	4542.98965304,8.04113316579513
1	262400000	262500000	CLR,iHH12	3607.43156162,6.79355965200159
1	262500000	262600000	CLR,iHH12	3021.30689169,4.71301538520457
1	263800000	263900000	CLR,iHH12	1116.87333937,5.14138231591998
1	263900000	264000000	CLR,iHH12	2515.9953864,5.25726071757548
1	264000000	264100000	CLR,iHH12	3281.31834147,5.62689231514626
1	264000000	264100000	di,CLR	1.47860071304179,3281.31834147
1	264000000	264100000	di,iHH12	1.47860071304179,5.62689231514626
1	264100000	264200000	di,CLR	1.92706901075438,2603.73023368
1	264700000	264800000	CLR,iHH12	1225.24493766,4.89021338285583
1	293800000	293900000	di,CLR	1.5006762160259,573.41230251
2	31700000	31800000	CLR,iHH12	1046.88071143,5.50723459934049
2	31800000	31900000	CLR,iHH12	969.46217818,5.199803365157
2	33600000	33700000	di,iHH12	1.59606377221461,4.71309235304617
2	33800000	33900000	di,iHH12	1.37393686933421,5.76326723971935
2	33900000	34000000	CLR,iHH12	1206.42992032,5.31702745217823
2	34000000	34100000	di,CLR	2.47252235238452,1680.51248167
2	34100000	34200000	di,CLR	2.30411219971633,929.59707748
2	58600000	58700000	di,iHH12	2.20627504467063,5.04707623108071
2	58700000	58800000	di,iHH12	2.80734254417714,4.75580757696575
2	68900000	69000000	di,iHH12	1.33004737235176,5.86516287680788
2	71300000	71400000	di,iHH12	2.00539567176434,7.06761235143195
2	71400000	71500000	di,iHH12	1.69903991746309,6.37367304397107
2	73700000	73800000	di,CLR	3.27944489293646,920.83677233
2	73800000	73900000	di,CLR	1.5264414629174,1062.62785039
2	73900000	74000000	di,CLR	1.47965459454329,1122.40623697
2	74000000	74100000	di,CLR	2.7086173625349,1038.86613104
2	74100000	74200000	di,CLR	1.42671201970766,658.15464301
2	74300000	74400000	di,CLR	2.67251389951708,789.38725405
2	76100000	76200000	di,CLR	2.60762687253349,712.89751753
2	76200000	76300000	di,CLR	2.28287085822732,785.53133064
2	77900000	78000000	di,CLR	1.33824719782879,1462.54841507
2	78000000	78100000	di,CLR	1.57111636394618,1938.75489467
2	78300000	78400000	di,CLR	2.52153107878122,686.614277829999
2	79700000	79800000	di,CLR	1.85876538918347,4454.16386794
2	79800000	79900000	di,CLR	1.76129453441922,4349.45755649
2	79900000	80000000	di,CLR	1.52574727769355,4323.90506453
2	80200000	80300000	di,CLR	1.43547214064679,2940.39205941
2	80300000	80400000	di,CLR	1.79281461508971,2953.69680472
2	80400000	80500000	di,CLR	1.64748552973977,2896.25461648
2	80500000	80600000	di,CLR	2.04887226220414,2446.20905702
2	82200000	82300000	di,CLR	2.09404814122566,2916.48785551
2	82700000	82800000	di,CLR	1.33109413265821,2905.80587553
2	83100000	83200000	di,CLR	3.20067724949117,5215.29942039
2	83500000	83600000	di,CLR	1.70199879023021,3820.10081188
2	83800000	83900000	di,CLR	2.24129436533804,1274.71536355
2	84900000	85000000	di,CLR	1.43048336747431,3221.2799986
2	85000000	85100000	di,CLR	1.77236007778685,4380.39681151
2	85100000	85200000	di,CLR	1.60652642224555,3882.45132743
2	86000000	86100000	CLR,iHH12	2489.41187493,7.69713262273568
2	86100000	86200000	CLR,iHH12	3592.09440316,5.65956029812036
2	86700000	86800000	CLR,iHH12	3208.98212772,8.62528074703047
2	86800000	86900000	CLR,iHH12	2978.2620432,8.35878328170613
2	86900000	87000000	CLR,iHH12	3065.74184375,6.64611285918062
2	87000000	87100000	CLR,iHH12	1412.38864806,5.02086869740063
2	87100000	87200000	CLR,iHH12	770.13568422,6.4217960761087
2	87200000	87300000	CLR,iHH12	633.71448342,7.79038360152077
2	87400000	87500000	CLR,iHH12	1546.38070357,5.56829885008017
2	87800000	87900000	CLR,iHH12	820.01674061,6.62453709227458
2	87900000	88000000	CLR,iHH12	3116.5330086,8.89098346778355
2	88000000	88100000	CLR,iHH12	5118.34265359,8.88949719222171
2	88100000	88200000	CLR,iHH12	5525.1993892,8.96740280292149
2	88200000	88300000	CLR,iHH12	5631.75339128,8.44600907874161
2	88300000	88400000	CLR,iHH12	6751.53681058,8.50967121530708
2	88400000	88500000	CLR,iHH12	5807.7305212,8.52135499264043
2	88500000	88600000	CLR,iHH12	6364.94409724,8.85568442318986
2	88600000	88700000	CLR,iHH12	6198.93959867,8.85378529330528
2	88700000	88800000	CLR,iHH12	7097.29353372,8.89618543224999
2	88800000	88900000	CLR,iHH12	6968.87589982,8.9614989861064
2	88900000	89000000	CLR,iHH12	6133.49824172,9.01975273104407
2	89000000	89100000	CLR,iHH12	5125.52799021,8.61342150660996
2	89000000	89100000	di,CLR	1.41854493071174,5125.52799021
2	89000000	89100000	di,iHH12	1.41854493071174,8.61342150660996
2	89100000	89200000	CLR,iHH12	3343.46242127,8.56751210592201
2	89200000	89300000	CLR,iHH12	703.37778842,8.4775924344307
2	89300000	89400000	CLR,iHH12	811.05682435,8.44873391727165
2	89600000	89700000	di,iHH12	2.01312426648533,9.49796189306605
2	89700000	89800000	CLR,iHH12	683.83270586,9.59591570967774
2	89800000	89900000	CLR,iHH12	1755.62257397,10.2410377458376
2	89900000	90000000	CLR,iHH12	2556.85678036,8.5271349531587
2	90000000	90100000	CLR,iHH12	1526.00964504,7.59521953316897
2	90100000	90200000	CLR,iHH12	1553.52949289,5.11399085693703
2	156600000	156700000	CLR,iHH12	590.46102926,5.32859807684535
2	156700000	156800000	CLR,iHH12	2494.41699228,5.11704081824622
3	23500000	23600000	di,iHH12	2.27196835647034,6.26171658491333
3	23600000	23700000	di,iHH12	2.23030896961267,5.71737724318458
3	23700000	23800000	di,iHH12	1.70191291476716,5.17603770096481
3	25900000	26000000	CLR,iHH12	705.52300349,5.30638957246246
3	25900000	26000000	di,CLR	1.91048199496504,705.52300349
3	25900000	26000000	di,iHH12	1.91048199496504,5.30638957246246
3	26000000	26100000	di,CLR	1.8521256252158,1256.24850498
3	38000000	38100000	di,iHH12	1.69093453601708,4.77474329926804
3	49600000	49700000	di,CLR	1.3700374562813,1573.4857959
3	49700000	49800000	di,CLR	1.77313962010073,2632.68201859
3	50000000	50100000	di,CLR	2.19748698973046,3794.61640635
3	50300000	50400000	di,CLR	1.74807784333905,5335.87438342
3	50800000	50900000	di,CLR	1.43996327867756,4501.10966863
3	51300000	51400000	di,CLR	1.60094063565991,3281.7657589
3	51700000	51800000	di,CLR	1.88524865277207,597.77125262
3	51800000	51900000	di,CLR	1.81085757530585,1129.41530026
3	52200000	52300000	di,CLR	2.07977045043878,3442.65977516
3	52400000	52500000	di,CLR	1.54822939067246,4505.70180157
3	52700000	52800000	di,CLR	2.16503342386449,11099.22221395
3	53100000	53200000	di,CLR	2.18876558354777,11852.78268121
3	53200000	53300000	di,CLR	1.62552522430465,11808.21047082
3	53300000	53400000	di,CLR	1.59688195760682,11286.70437673
3	53800000	53900000	di,CLR	1.85380476044423,12396.70375305
3	54000000	54100000	di,CLR	1.44907740336574,12219.62772721
3	54100000	54200000	di,CLR	2.28792344695785,11381.45259572
3	54200000	54300000	di,CLR	1.5737259424038,10978.8228759
3	54300000	54400000	di,CLR	1.40817151832168,11140.53891659
3	54400000	54500000	di,CLR	1.86502398908171,10055.97862658
3	54500000	54600000	di,CLR	3.51590751504971,10134.15552681
3	54600000	54700000	di,CLR	2.04007320453962,9581.791301
3	54700000	54800000	di,CLR	2.03719701467435,8900.39977805
3	55200000	55300000	di,CLR	1.41341432187616,5918.36738563
3	55500000	55600000	di,CLR	2.1675298171046,4987.98206012
3	55700000	55800000	di,CLR	2.08011870850012,3605.91499207
3	56900000	57000000	di,CLR	1.43004994736689,1194.52436826
3	57000000	57100000	di,CLR	1.39809417009231,1171.89079633
3	57300000	57400000	di,CLR	2.09095604476185,801.25556396
3	57400000	57500000	di,CLR	2.08832419612933,1189.59941905
3	81900000	82000000	di,CLR	1.39582895707541,764.87029306
3	84600000	84700000	di,CLR	1.41823208313867,1313.01499404
3	84700000	84800000	di,CLR	2.24707818784115,1493.43853962
3	84800000	84900000	di,CLR	1.83225350984592,1031.11128663
3	84900000	85000000	CLR,iHH12	1099.73762987,4.78086386460256
3	85000000	85100000	di,CLR	1.39412679230078,925.50329771
3	85900000	86000000	CLR,iHH12	623.14033377,6.01780637958572
3	86900000	87000000	CLR,iHH12	643.6255737,8.38905169637732
3	86900000	87000000	di,CLR	1.3724336793413,643.6255737
3	86900000	87000000	di,iHH12	1.3724336793413,8.38905169637732
3	87000000	87100000	CLR,iHH12	1224.99586795,8.16535071014751
3	87100000	87200000	CLR,iHH12	1153.72110376,7.54535911661247
3	87200000	87300000	CLR,iHH12	524.11866272,6.80085891642751
3	87800000	87900000	CLR,iHH12	489.41219773,6.10216971998358
3	88800000	88900000	di,CLR	1.61190949751435,491.28331344
4	39800000	39900000	CLR,iHH12	727.33696133,6.91430922004301
4	39900000	40000000	CLR,iHH12	977.52143735,4.98409140496803
4	90400000	90500000	di,iHH12	1.33775158145452,7.00742998701523
4	90600000	90700000	CLR,iHH12	593.20254866,7.64977823191817
4	90700000	90800000	CLR,iHH12	608.54341032,7.32040305324155
4	90800000	90900000	di,iHH12	1.34136731373772,9.1365216953238
4	90900000	91000000	di,iHH12	1.51265730166515,12.0502995657098
4	91000000	91100000	di,iHH12	1.3787106439228,10.7163087612628
4	91800000	91900000	di,iHH12	2.44057565998279,5.53279544259672
5	40100000	40200000	di,iHH12	1.58014713703506,5.73889881913804
5	49800000	49900000	CLR,iHH12	719.59245815,8.06251901971272
5	49900000	50000000	CLR,iHH12	1242.27120877,6.98579288175266
5	50000000	50100000	CLR,iHH12	1312.63754867,5.86787833228513
5	50400000	50500000	di,CLR	2.47651267364162,582.54383511
5	53200000	53300000	di,iHH12	2.43084644520939,5.63143666165577
5	55000000	55100000	CLR,iHH12	1259.13518385,4.75069453496883
5	55000000	55100000	di,CLR	1.96558615384125,1259.13518385
5	55000000	55100000	di,iHH12	1.96558615384125,4.75069453496883
5	55100000	55200000	CLR,iHH12	690.80958884,5.71425091822757
5	55200000	55300000	CLR,iHH12	1595.40602498,7.11861362210027
5	55200000	55300000	di,CLR	1.67549085229772,1595.40602498
5	55200000	55300000	di,iHH12	1.67549085229772,7.11861362210027
5	55300000	55400000	CLR,iHH12	1816.33083159,5.53633566841415
5	55300000	55400000	di,CLR	2.02104318654056,1816.33083159
5	55300000	55400000	di,iHH12	2.02104318654056,5.53633566841415
5	56300000	56400000	di,iHH12	2.81437861360106,4.84570768686518
5	56500000	56600000	CLR,iHH12	753.07953472,5.58488733676759
5	56600000	56700000	CLR,iHH12	924.10056456,5.18074424024396
5	57800000	57900000	di,iHH12	2.00401369784568,12.0725709921496
5	57900000	58000000	di,iHH12	1.84914637785604,10.1393841647023
5	58000000	58100000	di,iHH12	1.85607988451214,9.33976643795271
5	58100000	58200000	CLR,iHH12	553.34301738,9.11209448122875
5	58100000	58200000	di,CLR	1.56847372624171,553.34301738
5	58100000	58200000	di,iHH12	1.56847372624171,9.11209448122875
5	58200000	58300000	CLR,iHH12	836.43274848,8.11026562213682
5	58200000	58300000	di,CLR	1.43852269750195,836.43274848
5	58200000	58300000	di,iHH12	1.43852269750195,8.11026562213682
5	58300000	58400000	CLR,iHH12	781.77712009,6.79986600178134
5	58300000	58400000	di,CLR	1.95374181146838,781.77712009
5	58300000	58400000	di,iHH12	1.95374181146838,6.79986600178134
5	58400000	58500000	CLR,iHH12	768.67959212,4.98764195214354
5	58400000	58500000	di,CLR	1.63918179922947,768.67959212
5	58400000	58500000	di,iHH12	1.63918179922947,4.98764195214354
5	58600000	58700000	CLR,iHH12	591.18745697,5.26245843207095
5	69300000	69400000	CLR,iHH12	1318.96593247,4.78510047244887
5	70000000	70100000	CLR,iHH12	725.61425493,5.53243419506432
6	31700000	31800000	di,CLR	2.02686893626422,1446.42375169
6	32800000	32900000	di,CLR	2.12169641133555,2266.44897902
6	33000000	33100000	di,CLR	2.482171437,2254.79062819
6	64500000	64600000	CLR,iHH12	2267.97409701,4.76263662520951
6	64600000	64700000	CLR,iHH12	1032.09093734,4.90850086830887
6	64700000	64800000	CLR,iHH12	2237.60729336,5.21498828666779
6	64800000	64900000	CLR,iHH12	2492.24371273,5.13945925672533
6	65400000	65500000	CLR,iHH12	802.17660784,5.31103187921507
6	65500000	65600000	CLR,iHH12	1182.47679864,4.72945785036197
6	66200000	66300000	di,CLR	3.12189356793227,1639.21305221
6	75200000	75300000	di,CLR	3.32837030531941,1048.12029873
6	79000000	79100000	di,iHH12	2.1463984035208,4.75130349509486
6	86600000	86700000	di,iHH12	2.31522783286077,8.33263928171904
6	86700000	86800000	CLR,iHH12	738.22300538,7.77229275218928
6	87000000	87100000	CLR,iHH12	941.27356192,4.94620472038447
6	98900000	99000000	di,iHH12	1.42622914034314,4.97060655065175
6	99600000	99700000	di,iHH12	1.42839283294394,5.10131106855008
6	107300000	107400000	CLR,iHH12	623.7841434,5.63273715277237
6	111900000	112000000	di,iHH12	1.90785814279646,6.61770848177657
6	112200000	112300000	CLR,iHH12	723.46632384,6.82820730421941
6	112600000	112700000	di,CLR	1.64065437706875,1289.75129188
6	114000000	114100000	di,CLR	1.86591127160065,1718.09893813
6	114100000	114200000	di,CLR	1.79732452578965,1525.17867174
6	114700000	114800000	di,CLR	1.50313884114328,821.09629377
6	144500000	144600000	di,CLR	1.56643281012273,866.81169989
7	14000000	14100000	CLR,iHH12	591.35090947,6.98071477358305
7	14100000	14200000	CLR,iHH12	619.1053387,6.36704902572632
7	63500000	63600000	di,iHH12	2.26290780274631,4.78678832413379
7	65100000	65200000	di,iHH12	2.93417641786976,5.49454730451131
7	80900000	81000000	di,CLR	1.52245789323378,1672.54692535
7	81200000	81300000	di,CLR	1.3702634254963,1545.684364
7	126800000	126900000	di,CLR	2.09492724685787,795.00558195
8	108900000	109000000	di,iHH12	1.51982276546052,5.42199148529818
8	113400000	113500000	CLR,iHH12	927.19853814,6.59229316966911
8	123000000	123100000	CLR,iHH12	7135.44748709,4.99621211979294
8	123100000	123200000	CLR,iHH12	7296.50930427,10.2420315451716
8	123100000	123200000	di,CLR	1.8917560189781,7296.50930427
8	123100000	123200000	di,iHH12	1.8917560189781,10.2420315451716
8	123200000	123300000	CLR,iHH12	6646.81578726,8.229557814419
8	123300000	123400000	CLR,iHH12	3508.25247285,7.25255457384356
8	123400000	123500000	CLR,iHH12	6458.35396976,5.28599555190593
9	53600000	53700000	di,CLR	1.54462783020873,2927.20713707
9	53700000	53800000	di,CLR	2.58059704486019,3521.19039172
9	53800000	53900000	di,CLR	1.40128045362316,3467.26314588
9	54700000	54800000	di,CLR	1.6014514735765,3594.30400677
9	55000000	55100000	di,CLR	1.64337496400309,664.83011745
9	57900000	58000000	di,CLR	1.57438439522235,827.72065481
9	58000000	58100000	di,CLR	1.7174140000523,689.22076454
9	60800000	60900000	CLR,iHH12	650.58126211,4.68372210259879
9	60900000	61000000	di,CLR	1.89481342190309,551.94304789
9	62800000	62900000	CLR,iHH12	672.86870324,6.37899714450798
9	62800000	62900000	di,CLR	1.9140884061849,672.86870324
9	62800000	62900000	di,iHH12	1.9140884061849,6.37899714450798
9	62900000	63000000	di,CLR	2.36009365875591,551.50789357
9	63600000	63700000	CLR,iHH12	613.45566307,5.20203720193894
9	63700000	63800000	di,iHH12	2.44059314992273,7.21538185871519
9	63900000	64000000	di,iHH12	3.30479421413865,5.33761217211241
9	64500000	64600000	CLR,iHH12	882.20892281,6.08799161445038
9	64600000	64700000	CLR,iHH12	946.50053041,5.33785890171957
9	64600000	64700000	di,CLR	2.91689175826221,946.50053041
9	64600000	64700000	di,iHH12	2.91689175826221,5.33785890171957
9	64700000	64800000	di,CLR	2.44857103626211,743.37439673
9	64800000	64900000	di,CLR	1.64026896400491,869.054617440001
9	66000000	66100000	CLR,iHH12	1020.11037042,5.49979806085226
9	66100000	66200000	CLR,iHH12	2026.82905319,10.392281029052
9	66300000	66400000	di,CLR	2.02639952006896,1993.68008787
9	66400000	66500000	di,CLR	1.3877954428595,1378.74871673
9	70100000	70200000	CLR,iHH12	506.75695702,8.72943357129802
9	70200000	70300000	CLR,iHH12	805.9353532,8.37615412733513
9	70800000	70900000	CLR,iHH12	1209.79779243,6.17002576837749
9	70900000	71000000	CLR,iHH12	778.3898682,4.74377096797659
9	75300000	75400000	di,iHH12	1.50107450407126,10.3829926587121
9	75500000	75600000	CLR,iHH12	518.20850205,12.6648022610241
9	75500000	75600000	di,CLR	1.75513607463145,518.20850205
9	75500000	75600000	di,iHH12	1.75513607463145,12.6648022610241
9	75600000	75700000	CLR,iHH12	653.74942212,12.3939491825949
9	75700000	75800000	CLR,iHH12	1273.72781946,10.5342721158292
9	75800000	75900000	CLR,iHH12	1418.07806913,8.54618818015284
9	75900000	76000000	CLR,iHH12	763.04090088,6.344313046428
9	76900000	77000000	di,iHH12	2.57635018385834,13.6027401934467
9	77000000	77100000	di,iHH12	2.3488070228814,11.6150945878261
9	77500000	77600000	CLR,iHH12	727.66344931,6.24147020892648
9	77600000	77700000	CLR,iHH12	1253.67769039,5.25665438838386
9	77600000	77700000	di,CLR	1.35124763858496,1253.67769039
9	77600000	77700000	di,iHH12	1.35124763858496,5.25665438838386
9	77800000	77900000	di,CLR	1.43567163349418,2227.15657092
9	77900000	78000000	di,CLR	1.60537928588256,2757.33679413
9	78000000	78100000	di,CLR	3.7883733719727,3156.49631103
9	78100000	78200000	di,CLR	1.78099076011244,3195.63091211
9	78400000	78500000	di,CLR	1.6334970301102,2734.42309567
9	78600000	78700000	di,CLR	1.55534024600616,4683.94458773
9	78700000	78800000	di,CLR	2.21629571703463,5348.1453509
9	78900000	79000000	di,CLR	2.45452255735825,6241.76057788
9	79000000	79100000	di,CLR	2.2808779008057,6529.1775098
9	79400000	79500000	di,CLR	2.22423432775048,7215.05797125
9	79500000	79600000	di,CLR	1.51004936038527,6965.83398186
9	79600000	79700000	di,CLR	1.47880609648608,6734.10456414
9	79900000	80000000	di,CLR	1.95593168101164,6236.77789002
9	80000000	80100000	di,CLR	1.33837883682188,5734.15141383
9	81300000	81400000	di,CLR	1.88447252351425,3766.31235169
9	83100000	83200000	di,CLR	1.52394183644131,3870.06279583
9	83300000	83400000	di,CLR	1.66907869309545,5255.89280906
9	83600000	83700000	di,CLR	1.77641059531894,5887.48275837
9	84200000	84300000	di,CLR	1.50630406307867,2856.67888964
9	85500000	85600000	CLR,iHH12	1198.90712516,6.42368346426483
9	85600000	85700000	CLR,iHH12	1968.38018169,6.4150548089197
9	85700000	85800000	CLR,iHH12	2160.42930613,6.4299175645381
9	85800000	85900000	CLR,iHH12	1719.13732639,7.76455173363803
9	85900000	86000000	CLR,iHH12	1565.76285931,7.70815583315266
9	86000000	86100000	CLR,iHH12	756.41653901,7.74176217502315
9	86300000	86400000	CLR,iHH12	740.11232297,7.96726320610008
9	86400000	86500000	CLR,iHH12	1395.56626448,7.87754996177013
9	86500000	86600000	CLR,iHH12	1370.67284074,7.86549461554632
9	86600000	86700000	CLR,iHH12	878.12404774,7.82561288797028
9	87100000	87200000	CLR,iHH12	724.680024230001,7.95471243468898
9	87200000	87300000	CLR,iHH12	1382.58743613,7.94401950773019
9	87300000	87400000	CLR,iHH12	1626.87716759,7.94236809043926
9	87400000	87500000	CLR,iHH12	1993.9894951,7.8209476341234
9	87500000	87600000	CLR,iHH12	1916.00407903,7.68375614267912
9	87600000	87700000	CLR,iHH12	2097.94900875,7.57629016247164
9	87700000	87800000	CLR,iHH12	2135.30127654,7.57051020195338
9	87800000	87900000	CLR,iHH12	1650.01765574,7.44615847994611
9	87900000	88000000	CLR,iHH12	1331.62091002,7.44483734611336
9	88000000	88100000	CLR,iHH12	2071.19306747,7.41734124821933
9	88000000	88100000	di,CLR	1.80068185415117,2071.19306747
9	88000000	88100000	di,iHH12	1.80068185415117,7.41734124821933
9	88100000	88200000	CLR,iHH12	2009.34606248,7.39426269157853
9	88200000	88300000	CLR,iHH12	1832.35815416,7.3857991779625
9	88200000	88300000	di,CLR	2.17253985188886,1832.35815416
9	88200000	88300000	di,iHH12	2.17253985188886,7.3857991779625
9	88300000	88400000	CLR,iHH12	2693.99085101,7.37997793201196
9	88300000	88400000	di,CLR	2.61569037271323,2693.99085101
9	88300000	88400000	di,iHH12	2.61569037271323,7.37997793201196
9	88400000	88500000	CLR,iHH12	1771.77697839,7.3302289861226
9	88500000	88600000	CLR,iHH12	1856.89969653,7.32564630314026
9	88500000	88600000	di,CLR	1.91064725753485,1856.89969653
9	88500000	88600000	di,iHH12	1.91064725753485,7.32564630314026
9	88600000	88700000	CLR,iHH12	1952.29713371,7.32469673819797
9	88700000	88800000	CLR,iHH12	1278.2890555,7.32432516930751
9	88900000	89000000	CLR,iHH12	1099.52308201,8.04739823014261
9	89000000	89100000	CLR,iHH12	2344.13690724,9.62846514448204
9	89000000	89100000	di,CLR	2.18434976782127,2344.13690724
9	89000000	89100000	di,iHH12	2.18434976782127,9.62846514448204
9	89100000	89200000	CLR,iHH12	2923.60947351,9.62305675285423
9	89200000	89300000	CLR,iHH12	2975.80725317,9.61389138688956
9	89300000	89400000	CLR,iHH12	3089.94958875,9.60162961350438
9	89400000	89500000	CLR,iHH12	3004.39080782,9.59238167667515
9	89500000	89600000	CLR,iHH12	3108.30635049,9.52087530797774
9	89600000	89700000	CLR,iHH12	2361.84991095,9.46600696848649
9	89700000	89800000	CLR,iHH12	2642.15185767,9.46456197835692
9	89800000	89900000	CLR,iHH12	2774.32079091,9.41865257766898
9	89800000	89900000	di,CLR	1.50740522573949,2774.32079091
9	89800000	89900000	di,iHH12	1.50740522573949,9.41865257766898
9	89900000	90000000	CLR,iHH12	2734.19324891,9.42827208338867
9	90000000	90100000	CLR,iHH12	1970.98308429,9.41518460135802
9	90100000	90200000	CLR,iHH12	1456.01095401,9.38157825948753
9	90200000	90300000	CLR,iHH12	628.99203416,9.62796971929476
9	90600000	90700000	CLR,iHH12	723.523694540001,9.52900853813559
9	90900000	91000000	CLR,iHH12	826.49885088,9.70678360950455
9	91000000	91100000	CLR,iHH12	1741.10254877,9.64844729370233
9	91100000	91200000	CLR,iHH12	1898.93911896,9.64824086654097
9	91200000	91300000	CLR,iHH12	2143.49759509,9.56864255311799
9	91300000	91400000	CLR,iHH12	2212.85312813,9.56075703555378
9	91400000	91500000	CLR,iHH12	2115.10257368,9.64105720132541
9	91500000	91600000	CLR,iHH12	2242.25415986,9.58160617885181
9	91600000	91700000	CLR,iHH12	1775.06308062,9.57702349586947
9	91700000	91800000	CLR,iHH12	1058.35015471,9.53404536087294
9	91700000	91800000	di,CLR	1.47507380936406,1058.35015471
9	91700000	91800000	di,iHH12	1.47507380936406,9.53404536087294
9	91800000	91900000	CLR,iHH12	526.29036314,9.48392484609311
9	92000000	92100000	CLR,iHH12	1060.43708022,9.33542114620595
9	92100000	92200000	CLR,iHH12	863.57356922,9.32592549678308
9	97200000	97300000	di,iHH12	1.59457600729808,5.22566279055735
9	101000000	101100000	di,iHH12	1.47097706020097,8.92434695417009
9	102500000	102600000	di,iHH12	1.52127477254995,8.84083145690076
9	108600000	108700000	di,iHH12	1.34311910557407,9.23453831583551
9	149800000	149900000	di,CLR	2.3403710869139,1738.97492065
9	149900000	150000000	di,CLR	2.49803325200918,1458.90733396
9	150000000	150100000	di,CLR	2.00208157473543,1770.31510121
9	150200000	150300000	di,CLR	1.33615572599005,1179.62430743
9	150300000	150400000	di,CLR	1.6554560669008,585.43034015
10	1900000	2000000	di,CLR	1.45214594802037,545.62190927
10	30700000	30800000	CLR,iHH12	541.61205326,7.71224309094772
10	30800000	30900000	CLR,iHH12	1179.88421086,7.01354219696465
10	31000000	31100000	CLR,iHH12	672.14365753,4.92806707337312
10	70500000	70600000	di,CLR	1.39511352083477,724.03062015
12	22200000	22300000	di,CLR	1.44104308717386,2331.0006826
12	40500000	40600000	di,CLR	1.45817529337099,2496.03843082
12	44900000	45000000	CLR,iHH12	725.37935254,4.83288775923793
12	50100000	50200000	di,CLR	1.35093151901638,622.92987628
12	55500000	55600000	di,CLR	1.46640800557805,1555.36384003
13	105700000	105800000	di,iHH12	2.21017279409745,5.17321377739731
13	117600000	117700000	di,iHH12	2.50013521077137,4.91844609317371
13	131500000	131600000	di,CLR	1.59336862561612,525.43757635
13	131900000	132000000	di,CLR	2.12247029384172,561.68741813
13	132000000	132100000	di,CLR	1.82275965077727,578.08845236
13	139700000	139800000	CLR,iHH12	595.6801365,5.30206148297914
13	143100000	143200000	di,CLR	1.59286781790129,860.99939329
13	145700000	145800000	di,CLR	1.41857228591908,1494.79559562
13	146200000	146300000	di,CLR	1.79731714825052,2314.03435533
13	146300000	146400000	di,CLR	3.67432051261023,1412.0759843
13	173000000	173100000	di,iHH12	1.59319846591291,6.28360199256142
13	184600000	184700000	di,CLR	3.52872025882484,525.65834986
13	197100000	197200000	di,CLR	1.33884173719859,957.094052739999
13	200800000	200900000	CLR,iHH12	580.26828374,5.26473336803509
13	200800000	200900000	di,CLR	1.34797796291968,580.26828374
13	200800000	200900000	di,iHH12	1.34797796291968,5.26473336803509
13	200900000	201000000	CLR,iHH12	672.08754224,5.73256617056913
13	201000000	201100000	di,CLR	1.40417946186235,1633.97593285
13	201100000	201200000	di,CLR	1.48237421723357,1419.53830214
14	80000000	80100000	di,iHH12	1.66582496687024,16.874306221045
14	80100000	80200000	CLR,iHH12	1249.13337158,16.8678244081781
14	80200000	80300000	CLR,iHH12	1635.82975488,16.5297792887241
14	80300000	80400000	CLR,iHH12	1973.87486348,16.3254989698357
14	80400000	80500000	CLR,iHH12	1200.63551922,16.3046498265376
14	82400000	82500000	di,iHH12	1.44734094980668,18.194443442659
14	84300000	84400000	di,iHH12	1.38900791635981,4.9727895178832
14	86700000	86800000	di,CLR	1.41092421412503,523.16349622
14	105100000	105200000	CLR,iHH12	1360.36603513,15.1602589293532
14	105200000	105300000	CLR,iHH12	1277.09256331,15.1292948551482
14	105300000	105400000	CLR,iHH12	646.4999671,15.1453548883025
14	107100000	107200000	CLR,iHH12	522.08294975,16.6547915776477
14	117200000	117300000	CLR,iHH12	517.82885317,8.44459786760208
14	117300000	117400000	CLR,iHH12	533.69613133,6.76030010776219
14	117400000	117500000	di,CLR	1.3743938248664,916.13701605
14	123900000	124000000	di,CLR	1.33628248193529,12910.27496606
14	125800000	125900000	di,CLR	1.39532447355806,16213.21808194
14	152600000	152700000	di,CLR	1.89862110644423,955.99549522
15	26300000	26400000	di,CLR	2.41696587728894,798.67120209
15	26400000	26500000	di,CLR	1.39006807492679,562.7456622
15	64700000	64800000	CLR,iHH12	659.51849268,6.40600683962639
15	64800000	64900000	CLR,iHH12	1219.89568881,5.08208837925835
15	65500000	65600000	CLR,iHH12	2188.24588695,7.06056053324204
15	65600000	65700000	CLR,iHH12	3552.50783137,7.21098014354431
15	65700000	65800000	CLR,iHH12	3669.77475164,7.0961326177687
15	65800000	65900000	CLR,iHH12	4020.94611377,8.00726503675182
15	65900000	66000000	CLR,iHH12	3798.25487565,7.29158020990261
15	66000000	66100000	CLR,iHH12	4919.11204416,6.73307649372116
15	66100000	66200000	CLR,iHH12	5206.69498405,6.05507336311778
15	66200000	66300000	CLR,iHH12	4605.74343481,5.40835598904587
15	66400000	66500000	CLR,iHH12	3918.17385659,4.76578436046473
15	66500000	66600000	CLR,iHH12	1923.80835985,6.00961307613222
15	66600000	66700000	CLR,iHH12	3089.44174384,8.26876703179289
15	66700000	66800000	CLR,iHH12	2847.5601527,7.24529244779304
15	66800000	66900000	CLR,iHH12	4311.06555237,8.90487245665454
15	66900000	67000000	CLR,iHH12	5329.18065977,10.2783700979707
15	66900000	67000000	di,CLR	1.86878795348508,5329.18065977
15	66900000	67000000	di,iHH12	1.86878795348508,10.2783700979707
15	67000000	67100000	CLR,iHH12	5518.54568147,8.54714768418068
15	67000000	67100000	di,CLR	1.82223279454062,5518.54568147
15	67000000	67100000	di,iHH12	1.82223279454062,8.54714768418068
15	67100000	67200000	CLR,iHH12	5717.01531779,8.55537418883366
15	67200000	67300000	CLR,iHH12	5942.1687953,7.67050351891938
15	67300000	67400000	CLR,iHH12	6056.17187542,7.60801113626832
15	67400000	67500000	CLR,iHH12	6159.51240249,6.43743151321184
15	67500000	67600000	CLR,iHH12	5937.50786894,4.73207480501356
15	67700000	67800000	CLR,iHH12	5178.27403756,4.94298143578186
15	67900000	68000000	CLR,iHH12	3346.39209463,7.73125539894833
15	68000000	68100000	CLR,iHH12	4813.28295895,13.9293337661239
15	68100000	68200000	CLR,iHH12	5099.63198433,14.5223370725819
15	68200000	68300000	CLR,iHH12	5014.33467072,14.9918556511103
15	68300000	68400000	CLR,iHH12	4623.9977652,14.6114516781438
15	68400000	68500000	CLR,iHH12	4188.7471264,14.3252197761928
15	68500000	68600000	CLR,iHH12	3615.27044317,13.7000069516563
15	68600000	68700000	CLR,iHH12	3085.51508636,12.2548379185499
15	68700000	68800000	CLR,iHH12	2506.69115527,10.9584163659784
15	68800000	68900000	CLR,iHH12	1845.09911638,10.3797586748865
15	68900000	69000000	CLR,iHH12	1073.41036483,9.29510428328024
15	69100000	69200000	CLR,iHH12	957.87292668,5.90202701460684
15	70200000	70300000	CLR,iHH12	561.99106537,4.82484317133173
15	70800000	70900000	di,iHH12	1.49976894107433,7.96897655153942
15	76800000	76900000	di,iHH12	1.91428465253265,4.73065930447847
15	76900000	77000000	di,iHH12	1.61117328773414,5.00584514157676
15	77100000	77200000	di,iHH12	1.66143643471637,5.44227748824634
15	78300000	78400000	di,CLR	1.84505615721124,892.20639173
15	82500000	82600000	di,CLR	1.79231215705216,933.42405346
15	82800000	82900000	di,CLR	2.0753774963031,1094.88638536
15	82900000	83000000	di,CLR	2.28736924594354,1045.15375432
15	83100000	83200000	di,CLR	1.96879039196657,863.29141413
15	83200000	83300000	di,CLR	1.33319382178511,813.65212252
15	83500000	83600000	di,CLR	1.51424805703642,776.06833329
15	88600000	88700000	di,CLR	2.06374260080428,1157.45582616
15	88700000	88800000	di,CLR	1.49807644957357,1053.68828442
15	112800000	112900000	CLR,iHH12	575.47223367,6.4404453497678
15	112900000	113000000	CLR,iHH12	1048.79450273,5.57811652587477
15	114700000	114800000	di,CLR	2.56536388051813,4814.96886871
15	120700000	120800000	di,CLR	1.68624945620523,773.25303977
15	120900000	121000000	di,CLR	1.73860139069817,1330.1778978
15	121200000	121300000	CLR,iHH12	1129.37850492,4.82564823726106
15	145400000	145500000	di,CLR	1.33534407190722,2088.99743659
15	145700000	145800000	di,CLR	1.34206789125073,2413.19432677
15	146000000	146100000	di,CLR	1.70492336907059,1087.72844894
15	146100000	146200000	di,CLR	1.48889202810261,3384.94887212
15	146200000	146300000	di,CLR	1.68743610261284,3843.92431635
15	146300000	146400000	di,CLR	2.60311545825916,4719.78902183
15	146400000	146500000	di,CLR	1.40277548855204,5454.95526931
15	147000000	147100000	di,CLR	1.54141943824551,4392.97703969
15	147100000	147200000	di,CLR	2.4336174206474,3586.7134151
15	147200000	147300000	di,CLR	3.17603669839545,3440.04600246
16	39800000	39900000	CLR,iHH12	1224.92916417,6.48365849414805
16	39900000	40000000	CLR,iHH12	1224.2446277,5.46673030621188
16	45200000	45300000	CLR,iHH12	691.26517497,5.81258681711307
16	45300000	45400000	CLR,iHH12	624.250523,4.84038713658263
16	50100000	50200000	di,CLR	1.81683472432431,511.22496983
16	52700000	52800000	di,iHH12	1.4725501642954,5.33465633175894
16	57100000	57200000	CLR,iHH12	893.83538929,5.41949789508063
16	57300000	57400000	CLR,iHH12	1605.21051419,5.05891092960537
16	58200000	58300000	di,CLR	1.87960479164084,1289.14116675
16	58500000	58600000	di,CLR	2.10023891821665,838.90700118
17	36100000	36200000	di,CLR	1.44625010331063,1367.94219993
17	36200000	36300000	di,CLR	1.65641540740075,986.48458052
17	57400000	57500000	di,CLR	1.56332617791406,572.52575155
17	57900000	58000000	di,iHH12	1.90120248114127,5.46579262646979
17	58000000	58100000	CLR,iHH12	672.78110083,8.49373503844958
17	58100000	58200000	CLR,iHH12	960.21378878,9.03716142165266
17	58100000	58200000	di,CLR	2.65484415838096,960.21378878
17	58100000	58200000	di,iHH12	2.65484415838096,9.03716142165266
17	58500000	58600000	CLR,iHH12	1083.71257442,6.19194833291462
17	58600000	58700000	CLR,iHH12	1971.45960332,4.75097665208936
17	58700000	58800000	CLR,iHH12	1911.39152138,4.78246367510316
18	1200000	1300000	di,CLR	1.3903262829546,605.72910413
18	1300000	1400000	di,CLR	2.05248205276544,1169.50451142
18	1400000	1500000	di,CLR	2.19256438514433,1252.98287182
18	42300000	42400000	CLR,iHH12	923.26925345,5.5471730943859
18	42400000	42500000	CLR,iHH12	551.18307551,5.17840866436107
18	42500000	42600000	CLR,iHH12	552.15022648,4.76066083831961
18	49800000	49900000	di,CLR	1.46105531997983,1334.32748626
18	51100000	51200000	di,CLR	1.36905006994365,1244.46802937
18	51200000	51300000	di,CLR	2.3266068979342,631.28155769

## Sheet: table S6
Table S6 Candidate Regions with 474 Protein Code Genes
Chromosome	Start	End	methods	values	Chromosome	Start	End	Ensembl gene ID	Ensembl transcript ID	Gene name
1	9200000	9300000	di,CLR	1.50249795620729,527.09941187	chr1	9166934	9271240	ENSSSCT00000004472	ENSSSCG00000004044	IGF2R
1	16700000	16800000	di,CLR	1.54726040237733,509.9457478	chr1	16779137	16779254	ENSSSCT00000035668	ENSSSCG00000025777	ESR1
1	16800000	16900000	di,CLR	2.46153536738868,553.27175078	chr1	16870878	16871069	ENSSSCT00000035869	ENSSSCG00000025777	ESR1
1	49100000	49200000	CLR,iHH12	644.32523276,6.69865820501596	chr1	48981861	49188743	ENSSSCT00000004697	ENSSSCG00000004250	SLC35F1
1	51600000	51700000	di,CLR	1.98401217482076,1638.06439491	chr1	51670290	51670379	ENSSSCT00000021116	ENSSSCG00000019521
1	55100000	55200000	CLR,iHH12	599.26883514,6.18726931725698	chr1	55148418	55148525	ENSSSCT00000028110	ENSSSCG00000026369
1	55200000	55300000	CLR,iHH12	1160.84706262,5.97347408241062	chr1	55298661	55774196	ENSSSCT00000004719	ENSSSCG00000004270
1	55300000	55400000	CLR,iHH12	1857.79334268,5.58748831900081	chr1	55298661	55774196	ENSSSCT00000004719	ENSSSCG00000004270
1	55400000	55500000	CLR,iHH12	2086.18408755,4.89594700706447	chr1	55298661	55774196	ENSSSCT00000004719	ENSSSCG00000004270
1	72500000	72600000	di,CLR	2.05804403159252,637.39546431	chr1	72448164	72577787	ENSSSCT00000024655	ENSSSCG00000028811	KLHL32
1	113900000	114000000	CLR,iHH12	753.23954447,6.24372026498538	chr1	113933452	113933987	ENSSSCT00000005001	ENSSSCG00000004527
1	113900000	114000000	CLR,iHH12	753.23954447,6.24372026498538	chr1	113952130	114064057	ENSSSCT00000005002	ENSSSCG00000004528	MBD2
1	114000000	114100000	CLR,iHH12	866.88415554,6.36037913477906	chr1	113952130	114064057	ENSSSCT00000005002	ENSSSCG00000004528	MBD2
1	114100000	114200000	CLR,iHH12	987.90480419,5.62462456533067	chr1	114105386	114126890	ENSSSCT00000005003	ENSSSCG00000004529
1	114100000	114200000	CLR,iHH12	987.90480419,5.62462456533067	chr1	114153148	114165686	ENSSSCT00000005004	ENSSSCG00000004530	STARD6
1	114100000	114200000	CLR,iHH12	987.90480419,5.62462456533067	chr1	114168861	114190407	ENSSSCT00000005005	ENSSSCG00000004531
1	119600000	119700000	di,iHH12	1.52064227214803,6.03709965187894	chr1	119588475	119610419	ENSSSCT00000005040	ENSSSCG00000004563	LOC100738199
1	119600000	119700000	di,iHH12	1.52064227214803,6.03709965187894	chr1	119639237	119725151	ENSSSCT00000028774	ENSSSCG00000029654	LOC100738246
1	151700000	151800000	di,iHH12	1.96743959737416,5.00602016232001	chr1	151769326	151805705	ENSSSCT00000029836	ENSSSCG00000030384
1	151800000	151900000	di,iHH12	3.28051935629614,6.36327210673618	chr1	151769326	151805705	ENSSSCT00000029836	ENSSSCG00000030384
1	153400000	153500000	di,iHH12	3.25920791389916,6.25729801152428	chr1	153404630	153427813	ENSSSCT00000030120	ENSSSCG00000027431
1	153400000	153500000	di,iHH12	3.25920791389916,6.25729801152428	chr1	153478772	153511304	ENSSSCT00000005310	ENSSSCG00000004811	LOC100518709
1	153500000	153600000	di,iHH12	3.33131321141405,5.69460337303396	chr1	153478772	153511304	ENSSSCT00000005310	ENSSSCG00000004811	LOC100518709
1	153500000	153600000	di,iHH12	3.33131321141405,5.69460337303396	chr1	153514789	153853782	ENSSSCT00000005311	ENSSSCG00000004812	IGF1R
1	153500000	153600000	di,iHH12	3.33131321141405,5.69460337303396	chr1	153531547	153537363	ENSSSCT00000033584	ENSSSCG00000004812	IGF1R
1	153500000	153600000	di,iHH12	3.33131321141405,5.69460337303396	chr1	153543195	153554396	ENSSSCT00000035767	ENSSSCG00000004812	IGF1R
1	153500000	153600000	di,iHH12	3.33131321141405,5.69460337303396	chr1	153556940	153565189	ENSSSCT00000034979	ENSSSCG00000004812	IGF1R
1	223900000	224000000	di,iHH12	1.43840627197289,7.77006829309839	chr1	223956056	223958921	ENSSSCT00000005658	ENSSSCG00000005132	CDKN2B
1	223900000	224000000	di,iHH12	1.43840627197289,7.77006829309839	chr1	223989850	223992651	ENSSSCT00000005661	ENSSSCG00000005134	P14ARF
1	261700000	261800000	CLR,iHH12	5034.15644553,14.26033283847	chr1	261797374	261897606	ENSSSCT00000005828	ENSSSCG00000005291	TLE1
1	261800000	261900000	CLR,iHH12	5125.174256,14.0880987725415	chr1	261797374	261897606	ENSSSCT00000005828	ENSSSCG00000005291	TLE1
1	261800000	261900000	di,CLR	1.91393137604047,5125.174256	chr1	261797374	261897606	ENSSSCT00000005828	ENSSSCG00000005291	TLE1
1	261800000	261900000	di,iHH12	1.91393137604047,14.0880987725415	chr1	261797374	261897606	ENSSSCT00000005828	ENSSSCG00000005291	TLE1
1	262000000	262100000	CLR,iHH12	4730.01395791,11.5719355833168	chr1	262080693	262087247	ENSSSCT00000005829	ENSSSCG00000005292
1	263800000	263900000	CLR,iHH12	1116.87333937,5.14138231591998	chr1	263840376	263877089	ENSSSCT00000005843	ENSSSCG00000005305	UNC13B
1	263800000	263900000	CLR,iHH12	1116.87333937,5.14138231591998	chr1	263899824	263900141	ENSSSCT00000020452	ENSSSCG00000018857
1	263900000	264000000	CLR,iHH12	2515.9953864,5.25726071757548	chr1	263899824	263900141	ENSSSCT00000020452	ENSSSCG00000018857
1	263900000	264000000	CLR,iHH12	2515.9953864,5.25726071757548	chr1	263917345	263980135	ENSSSCT00000005845	ENSSSCG00000005307	LOC100156421
1	263900000	264000000	CLR,iHH12	2515.9953864,5.25726071757548	chr1	263990420	264048276	ENSSSCT00000005846	ENSSSCG00000005308	RUSC2
1	264000000	264100000	CLR,iHH12	3281.31834147,5.62689231514626	chr1	263990420	264048276	ENSSSCT00000005846	ENSSSCG00000005308	RUSC2
1	264000000	264100000	CLR,iHH12	3281.31834147,5.62689231514626	chr1	264047925	264050014	ENSSSCT00000005847	ENSSSCG00000005309	FAM166B
1	264000000	264100000	CLR,iHH12	3281.31834147,5.62689231514626	chr1	264066493	264070983	ENSSSCT00000005848	ENSSSCG00000005310	TESK1
1	264000000	264100000	CLR,iHH12	3281.31834147,5.62689231514626	chr1	264070940	264078460	ENSSSCT00000031998	ENSSSCG00000005311	CD72
1	264000000	264100000	CLR,iHH12	3281.31834147,5.62689231514626	chr1	264070946	264076743	ENSSSCT00000033028	ENSSSCG00000005311	CD72
1	264000000	264100000	CLR,iHH12	3281.31834147,5.62689231514626	chr1	264070946	264078590	ENSSSCT00000005849	ENSSSCG00000005311	CD72
1	264000000	264100000	CLR,iHH12	3281.31834147,5.62689231514626	chr1	264071194	264073181	ENSSSCT00000033090	ENSSSCG00000005311	CD72
1	264000000	264100000	CLR,iHH12	3281.31834147,5.62689231514626	chr1	264096730	264098460	ENSSSCT00000005850	ENSSSCG00000005312	SIT1
1	264000000	264100000	di,CLR	1.47860071304179,3281.31834147	chr1	263990420	264048276	ENSSSCT00000005846	ENSSSCG00000005308	RUSC2
1	264000000	264100000	di,CLR	1.47860071304179,3281.31834147	chr1	264047925	264050014	ENSSSCT00000005847	ENSSSCG00000005309	FAM166B
1	264000000	264100000	di,CLR	1.47860071304179,3281.31834147	chr1	264066493	264070983	ENSSSCT00000005848	ENSSSCG00000005310	TESK1
1	264000000	264100000	di,CLR	1.47860071304179,3281.31834147	chr1	264070940	264078460	ENSSSCT00000031998	ENSSSCG00000005311	CD72
1	264000000	264100000	di,CLR	1.47860071304179,3281.31834147	chr1	264070946	264076743	ENSSSCT00000033028	ENSSSCG00000005311	CD72
1	264000000	264100000	di,CLR	1.47860071304179,3281.31834147	chr1	264070946	264078590	ENSSSCT00000005849	ENSSSCG00000005311	CD72
1	264000000	264100000	di,CLR	1.47860071304179,3281.31834147	chr1	264071194	264073181	ENSSSCT00000033090	ENSSSCG00000005311	CD72
1	264000000	264100000	di,CLR	1.47860071304179,3281.31834147	chr1	264096730	264098460	ENSSSCT00000005850	ENSSSCG00000005312	SIT1
1	264000000	264100000	di,iHH12	1.47860071304179,5.62689231514626	chr1	263990420	264048276	ENSSSCT00000005846	ENSSSCG00000005308	RUSC2
1	264000000	264100000	di,iHH12	1.47860071304179,5.62689231514626	chr1	264047925	264050014	ENSSSCT00000005847	ENSSSCG00000005309	FAM166B
1	264000000	264100000	di,iHH12	1.47860071304179,5.62689231514626	chr1	264066493	264070983	ENSSSCT00000005848	ENSSSCG00000005310	TESK1
1	264000000	264100000	di,iHH12	1.47860071304179,5.62689231514626	chr1	264070940	264078460	ENSSSCT00000031998	ENSSSCG00000005311	CD72
1	264000000	264100000	di,iHH12	1.47860071304179,5.62689231514626	chr1	264070946	264076743	ENSSSCT00000033028	ENSSSCG00000005311	CD72
1	264000000	264100000	di,iHH12	1.47860071304179,5.62689231514626	chr1	264070946	264078590	ENSSSCT00000005849	ENSSSCG00000005311	CD72
1	264000000	264100000	di,iHH12	1.47860071304179,5.62689231514626	chr1	264071194	264073181	ENSSSCT00000033090	ENSSSCG00000005311	CD72
1	264000000	264100000	di,iHH12	1.47860071304179,5.62689231514626	chr1	264096730	264098460	ENSSSCT00000005850	ENSSSCG00000005312	SIT1
1	264100000	264200000	di,CLR	1.92706901075438,2603.73023368	chr1	264105053	264105311	ENSSSCT00000020295	ENSSSCG00000018700
1	264100000	264200000	di,CLR	1.92706901075438,2603.73023368	chr1	264105679	264108701	ENSSSCT00000005851	ENSSSCG00000005313	CCDC107
1	264100000	264200000	di,CLR	1.92706901075438,2603.73023368	chr1	264109481	264112677	ENSSSCT00000005852	ENSSSCG00000005314	C1H9orf100
1	264100000	264200000	di,CLR	1.92706901075438,2603.73023368	chr1	264119360	264126033	ENSSSCT00000005853	ENSSSCG00000005315	CA9
1	264100000	264200000	di,CLR	1.92706901075438,2603.73023368	chr1	264127280	264134736	ENSSSCT00000005854	ENSSSCG00000005316	TPM2
1	264100000	264200000	di,CLR	1.92706901075438,2603.73023368	chr1	264141074	264169348	ENSSSCT00000005856	ENSSSCG00000005317	TLN1
1	264100000	264200000	di,CLR	1.92706901075438,2603.73023368	chr1	264176183	264181561	ENSSSCT00000005857	ENSSSCG00000005318	CREB3
1	264100000	264200000	di,CLR	1.92706901075438,2603.73023368	chr1	264181739	264192901	ENSSSCT00000005858	ENSSSCG00000005319	GBA2
1	264100000	264200000	di,CLR	1.92706901075438,2603.73023368	chr1	264193936	264199793	ENSSSCT00000005859	ENSSSCG00000005320	RGP1
1	264700000	264800000	CLR,iHH12	1225.24493766,4.89021338285583	chr1	264672808	264734347	ENSSSCT00000005877	ENSSSCG00000005338	RECK
2	31700000	31800000	CLR,iHH12	1046.88071143,5.50723459934049	chr2	31513517	31737323	ENSSSCT00000014547	ENSSSCG00000013321	ELP4
2	31700000	31800000	CLR,iHH12	1046.88071143,5.50723459934049	chr2	31639107	31737323	ENSSSCT00000031770	ENSSSCG00000013321	ELP4
2	31700000	31800000	CLR,iHH12	1046.88071143,5.50723459934049	chr2	31737404	31813219	ENSSSCT00000014548	ENSSSCG00000013322	IMMP1L
2	31800000	31900000	CLR,iHH12	969.46217818,5.199803365157	chr2	31737404	31813219	ENSSSCT00000014548	ENSSSCG00000013322	IMMP1L
2	31800000	31900000	CLR,iHH12	969.46217818,5.199803365157	chr2	31812050	31872543	ENSSSCT00000032359	ENSSSCG00000026083	DNAJC24
2	31800000	31900000	CLR,iHH12	969.46217818,5.199803365157	chr2	31891582	31911084	ENSSSCT00000014551	ENSSSCG00000013324
2	31800000	31900000	CLR,iHH12	969.46217818,5.199803365157	chr2	31891582	31910261	ENSSSCT00000032119	ENSSSCG00000013324
2	58600000	58700000	di,iHH12	2.20627504467063,5.04707623108071	chr2	58606500	58627845	ENSSSCT00000015213	ENSSSCG00000013927	ARMC6
2	58600000	58700000	di,iHH12	2.20627504467063,5.04707623108071	chr2	58626727	58661857	ENSSSCT00000025508	ENSSSCG00000025839	SUGP2
2	58700000	58800000	di,iHH12	2.80734254417714,4.75580757696575	chr2	58714583	58721466	ENSSSCT00000015205	ENSSSCG00000013919
2	58700000	58800000	di,iHH12	2.80734254417714,4.75580757696575	chr2	58721733	58729511	ENSSSCT00000025399	ENSSSCG00000025329	DDX49
2	58700000	58800000	di,iHH12	2.80734254417714,4.75580757696575	chr2	58729803	58747259	ENSSSCT00000027115	ENSSSCG00000027840	COPE
2	58700000	58800000	di,iHH12	2.80734254417714,4.75580757696575	chr2	58750605	58769669	ENSSSCT00000015208	ENSSSCG00000013922	CERS1
2	68900000	69000000	di,iHH12	1.33004737235176,5.86516287680788	chr2	68869791	68902530	ENSSSCT00000014935	ENSSSCG00000013671
2	68900000	69000000	di,iHH12	1.33004737235176,5.86516287680788	chr2	68920500	68929410	ENSSSCT00000014934	ENSSSCG00000013670	FBXL12
2	68900000	69000000	di,iHH12	1.33004737235176,5.86516287680788	chr2	68933922	68935737	ENSSSCT00000030558	ENSSSCG00000023331	LOC100621766
2	68900000	69000000	di,iHH12	1.33004737235176,5.86516287680788	chr2	68943610	68957203	ENSSSCT00000030404	ENSSSCG00000028631	PIN1
2	68900000	69000000	di,iHH12	1.33004737235176,5.86516287680788	chr2	68962304	68968830	ENSSSCT00000014932	ENSSSCG00000013668
2	71300000	71400000	di,iHH12	2.00539567176434,7.06761235143195	chr2	71305327	71320252	ENSSSCT00000014852	ENSSSCG00000013598	KANK3
2	71300000	71400000	di,iHH12	2.00539567176434,7.06761235143195	chr2	71320355	71321505	ENSSSCT00000014851	ENSSSCG00000013597	RPS28
2	71300000	71400000	di,iHH12	2.00539567176434,7.06761235143195	chr2	71321568	71328349	ENSSSCT00000014850	ENSSSCG00000013596	NDUFA7
2	71400000	71500000	di,iHH12	1.69903991746309,6.37367304397107	chr2	71403985	71448501	ENSSSCT00000014849	ENSSSCG00000013595	LASS4
2	71400000	71500000	di,iHH12	1.69903991746309,6.37367304397107	chr2	71490180	71490286	ENSSSCT00000020640	ENSSSCG00000019045
2	73700000	73800000	di,CLR	3.27944489293646,920.83677233	chr2	73719612	73724598	ENSSSCT00000014768	ENSSSCG00000026135	LOC100512091
2	73700000	73800000	di,CLR	3.27944489293646,920.83677233	chr2	73724889	73726884	ENSSSCT00000027158	ENSSSCG00000027953	LOC100512457
2	73700000	73800000	di,CLR	3.27944489293646,920.83677233	chr2	73729865	73787647	ENSSSCT00000014774	ENSSSCG00000013527	LOC102158996
2	73700000	73800000	di,CLR	3.27944489293646,920.83677233	chr2	73770701	73770808	ENSSSCT00000020270	ENSSSCG00000026929
2	73700000	73800000	di,CLR	3.27944489293646,920.83677233	chr2	73788289	73808755	ENSSSCT00000014773	ENSSSCG00000013526	LONP1
2	73800000	73900000	di,CLR	1.5264414629174,1062.62785039	chr2	73788289	73808755	ENSSSCT00000014773	ENSSSCG00000013526	LONP1
2	73800000	73900000	di,CLR	1.5264414629174,1062.62785039	chr2	73808881	73810492	ENSSSCT00000028373	ENSSSCG00000030010	RPL36
2	73800000	73900000	di,CLR	1.5264414629174,1062.62785039	chr2	73812198	73816650	ENSSSCT00000023893	ENSSSCG00000030546	HSD11B1L
2	73800000	73900000	di,CLR	1.5264414629174,1062.62785039	chr2	73816821	73818817	ENSSSCT00000014771	ENSSSCG00000013524	QIL1
2	73800000	73900000	di,CLR	1.5264414629174,1062.62785039	chr2	73822609	73904874	ENSSSCT00000014769	ENSSSCG00000013522	SAFB
2	73800000	73900000	di,CLR	1.5264414629174,1062.62785039	chr2	73854185	73859171	ENSSSCT00000014775	ENSSSCG00000023199	LOC100512091
2	73900000	74000000	di,CLR	1.47965459454329,1122.40623697	chr2	73822609	73904874	ENSSSCT00000014769	ENSSSCG00000013522	SAFB
2	73900000	74000000	di,CLR	1.47965459454329,1122.40623697	chr2	73905289	73939737	ENSSSCT00000014770	ENSSSCG00000013523	LOC100738473
2	73900000	74000000	di,CLR	1.47965459454329,1122.40623697	chr2	73956522	73956629	ENSSSCT00000026521	ENSSSCG00000024820
2	73900000	74000000	di,CLR	1.47965459454329,1122.40623697	chr2	73974120	73993353	ENSSSCT00000025076	ENSSSCG00000027128
2	74100000	74200000	di,CLR	1.42671201970766,658.15464301	chr2	74179257	74180454	ENSSSCT00000014766	ENSSSCG00000013519	LOC100511549
2	74300000	74400000	di,CLR	2.67251389951708,789.38725405	chr2	74357679	74418111	ENSSSCT00000031816	ENSSSCG00000028612	PTPRS
2	74300000	74400000	di,CLR	2.67251389951708,789.38725405	chr2	74379526	74418089	ENSSSCT00000032503	ENSSSCG00000028612	PTPRS
2	76100000	76200000	di,CLR	2.60762687253349,712.89751753	chr2	76183421	76212060	ENSSSCT00000014716	ENSSSCG00000013471	ZNF77
2	76100000	76200000	di,CLR	2.60762687253349,712.89751753	chr2	76183421	76212051	ENSSSCT00000025537	ENSSSCG00000013471	ZNF77
2	76200000	76300000	di,CLR	2.28287085822732,785.53133064	chr2	76183421	76212060	ENSSSCT00000014716	ENSSSCG00000013471	ZNF77
2	76200000	76300000	di,CLR	2.28287085822732,785.53133064	chr2	76183421	76212051	ENSSSCT00000025537	ENSSSCG00000013471	ZNF77
2	76200000	76300000	di,CLR	2.28287085822732,785.53133064	chr2	76266522	76266629	ENSSSCT00000021297	ENSSSCG00000026690
2	76200000	76300000	di,CLR	2.28287085822732,785.53133064	chr2	76286847	76296225	ENSSSCT00000024529	ENSSSCG00000023175	LOC100737823
2	77900000	78000000	di,CLR	1.33824719782879,1462.54841507	chr2	77897989	77926867	ENSSSCT00000022673	ENSSSCG00000023329	APC2
2	77900000	78000000	di,CLR	1.33824719782879,1462.54841507	chr2	77933424	77937774	ENSSSCT00000028123	ENSSSCG00000023248	RPS15
2	77900000	78000000	di,CLR	1.33824719782879,1462.54841507	chr2	77941685	77962772	ENSSSCT00000023438	ENSSSCG00000022528	DAZAP1
2	77900000	78000000	di,CLR	1.33824719782879,1462.54841507	chr2	77968840	77972112	ENSSSCT00000026588	ENSSSCG00000023142	GAMT
2	77900000	78000000	di,CLR	1.33824719782879,1462.54841507	chr2	77972667	77979308	ENSSSCT00000023318	ENSSSCG00000024144	NDUFS7
2	77900000	78000000	di,CLR	1.33824719782879,1462.54841507	chr2	77972667	77978440	ENSSSCT00000031245	ENSSSCG00000024144	NDUFS7
2	77900000	78000000	di,CLR	1.33824719782879,1462.54841507	chr2	77983553	78002119	ENSSSCT00000014670	ENSSSCG00000013426	LOC100511862
2	77900000	78000000	di,CLR	1.33824719782879,1462.54841507	chr2	77983559	78002119	ENSSSCT00000028114	ENSSSCG00000013426	LOC100511862
2	78000000	78100000	di,CLR	1.57111636394618,1938.75489467	chr2	77983553	78002119	ENSSSCT00000014670	ENSSSCG00000013426	LOC100511862
2	78000000	78100000	di,CLR	1.57111636394618,1938.75489467	chr2	77983559	78002119	ENSSSCT00000028114	ENSSSCG00000013426	LOC100511862
2	78300000	78400000	di,CLR	2.52153107878122,686.614277829999	chr2	78300486	78303036	ENSSSCT00000027334	ENSSSCG00000030333
2	78300000	78400000	di,CLR	2.52153107878122,686.614277829999	chr2	78314794	78317910	ENSSSCT00000014669	ENSSSCG00000013425
2	78300000	78400000	di,CLR	2.52153107878122,686.614277829999	chr2	78333363	78352550	ENSSSCT00000014668	ENSSSCG00000013424	PALM
2	78300000	78400000	di,CLR	2.52153107878122,686.614277829999	chr2	78357172	78360022	ENSSSCT00000014666	ENSSSCG00000013422	LOC100511492
2	78300000	78400000	di,CLR	2.52153107878122,686.614277829999	chr2	78358793	78358863	ENSSSCT00000023003	ENSSSCG00000021387
2	78300000	78400000	di,CLR	2.52153107878122,686.614277829999	chr2	78360258	78369701	ENSSSCT00000014665	ENSSSCG00000013421	PTBP1
2	79700000	79800000	di,CLR	1.85876538918347,4454.16386794	chr2	79770222	79812473	ENSSSCT00000015305	ENSSSCG00000014012	GFPT2
2	79800000	79900000	di,CLR	1.76129453441922,4349.45755649	chr2	79770222	79812473	ENSSSCT00000015305	ENSSSCG00000014012	GFPT2
2	79800000	79900000	di,CLR	1.76129453441922,4349.45755649	chr2	79823443	79823511	ENSSSCT00000028736	ENSSSCG00000026972
2	79800000	79900000	di,CLR	1.76129453441922,4349.45755649	chr2	79823590	79881271	ENSSSCT00000015303	ENSSSCG00000014010	MAPK9
2	79800000	79900000	di,CLR	1.76129453441922,4349.45755649	chr2	79837632	79881875	ENSSSCT00000035631	ENSSSCG00000014010	MAPK9
2	79900000	80000000	di,CLR	1.52574727769355,4323.90506453	chr2	79900016	79969251	ENSSSCT00000015304	ENSSSCG00000014011	RASGEF1C
2	80200000	80300000	di,CLR	1.43547214064679,2940.39205941	chr2	80242020	80292871	ENSSSCT00000015308	ENSSSCG00000014014	TBC1D9B
2	80200000	80300000	di,CLR	1.43547214064679,2940.39205941	chr2	80296799	80318894	ENSSSCT00000015309	ENSSSCG00000014015	C2H5orf45
2	80200000	80300000	di,CLR	1.43547214064679,2940.39205941	chr2	80296799	80318631	ENSSSCT00000015310	ENSSSCG00000014015	C2H5orf45
2	80300000	80400000	di,CLR	1.79281461508971,2953.69680472	chr2	80296799	80318894	ENSSSCT00000015309	ENSSSCG00000014015	C2H5orf45
2	80300000	80400000	di,CLR	1.79281461508971,2953.69680472	chr2	80296799	80318631	ENSSSCT00000015310	ENSSSCG00000014015	C2H5orf45
2	80300000	80400000	di,CLR	1.79281461508971,2953.69680472	chr2	80318833	80329991	ENSSSCT00000015311	ENSSSCG00000014016	SQSTM1
2	80300000	80400000	di,CLR	1.79281461508971,2953.69680472	chr2	80349826	80364466	ENSSSCT00000015312	ENSSSCG00000014017	MGAT4B
2	80300000	80400000	di,CLR	1.79281461508971,2953.69680472	chr2	80364916	80368220	ENSSSCT00000024428	ENSSSCG00000028488	LTC4S
2	80300000	80400000	di,CLR	1.79281461508971,2953.69680472	chr2	80384890	80443262	ENSSSCT00000015314	ENSSSCG00000014019	MAML1
2	80400000	80500000	di,CLR	1.64748552973977,2896.25461648	chr2	80384890	80443262	ENSSSCT00000015314	ENSSSCG00000014019	MAML1
2	80400000	80500000	di,CLR	1.64748552973977,2896.25461648	chr2	80445608	80482509	ENSSSCT00000015315	ENSSSCG00000014020	CANX
2	80500000	80600000	di,CLR	2.04887226220414,2446.20905702	chr2	80500234	80502316	ENSSSCT00000015316	ENSSSCG00000014021
2	80500000	80600000	di,CLR	2.04887226220414,2446.20905702	chr2	80528926	80537063	ENSSSCT00000015317	ENSSSCG00000014022	HNRNPH1
2	80500000	80600000	di,CLR	2.04887226220414,2446.20905702	chr2	80528926	80536859	ENSSSCT00000031735	ENSSSCG00000014022	HNRNPH1
2	80500000	80600000	di,CLR	2.04887226220414,2446.20905702	chr2	80539959	80588640	ENSSSCT00000015318	ENSSSCG00000014023	RUFY1
2	82200000	82300000	di,CLR	2.09404814122566,2916.48785551	chr2	82120287	82214175	ENSSSCT00000015341	ENSSSCG00000014044	NSD1
2	82200000	82300000	di,CLR	2.09404814122566,2916.48785551	chr2	82220163	82222343	ENSSSCT00000015340	ENSSSCG00000014043	RAB24
2	82200000	82300000	di,CLR	2.09404814122566,2916.48785551	chr2	82222449	82226996	ENSSSCT00000015339	ENSSSCG00000014042	PRELID1
2	82200000	82300000	di,CLR	2.09404814122566,2916.48785551	chr2	82227493	82231857	ENSSSCT00000015338	ENSSSCG00000014041	MXD3
2	82200000	82300000	di,CLR	2.09404814122566,2916.48785551	chr2	82260726	82273530	ENSSSCT00000015337	ENSSSCG00000014040	GP36B
2	82200000	82300000	di,CLR	2.09404814122566,2916.48785551	chr2	82278888	82294443	ENSSSCT00000015336	ENSSSCG00000014039	RGS14
2	83100000	83200000	di,CLR	3.20067724949117,5215.29942039	chr2	83138470	83139723	ENSSSCT00000029938	ENSSSCG00000029179	HIGD2A
2	83100000	83200000	di,CLR	3.20067724949117,5215.29942039	chr2	83139728	83146414	ENSSSCT00000032480	ENSSSCG00000029577	NOP16
2	83100000	83200000	di,CLR	3.20067724949117,5215.29942039	chr2	83148201	83157648	ENSSSCT00000027990	ENSSSCG00000029985	ARL10
2	83100000	83200000	di,CLR	3.20067724949117,5215.29942039	chr2	83154225	83154303	ENSSSCT00000027627	ENSSSCG00000025894	MIR1271
2	83100000	83200000	di,CLR	3.20067724949117,5215.29942039	chr2	83176654	83192263	ENSSSCT00000015359	ENSSSCG00000014060	LOC100524242
2	83100000	83200000	di,CLR	3.20067724949117,5215.29942039	chr2	83187378	83236070	ENSSSCT00000015361	ENSSSCG00000014062
2	83500000	83600000	di,CLR	1.70199879023021,3820.10081188	chr2	83529779	83554056	ENSSSCT00000022564	ENSSSCG00000029096	HRH2
2	83800000	83900000	di,CLR	2.24129436533804,1274.71536355	chr2	83782138	83956930	ENSSSCT00000026067	ENSSSCG00000022661	FCHO2
2	86000000	86100000	CLR,iHH12	2489.41187493,7.69713262273568	chr2	86053892	86174034	ENSSSCT00000015382	ENSSSCG00000014081	COL4A3BP
2	86000000	86100000	CLR,iHH12	2489.41187493,7.69713262273568	chr2	86053892	86174034	ENSSSCT00000026755	ENSSSCG00000014081	COL4A3BP
2	86100000	86200000	CLR,iHH12	3592.09440316,5.65956029812036	chr2	86053892	86174034	ENSSSCT00000015382	ENSSSCG00000014081	COL4A3BP
2	86100000	86200000	CLR,iHH12	3592.09440316,5.65956029812036	chr2	86053892	86174034	ENSSSCT00000026755	ENSSSCG00000014081	COL4A3BP
2	86100000	86200000	CLR,iHH12	3592.09440316,5.65956029812036	chr2	86173914	86251599	ENSSSCT00000015383	ENSSSCG00000014082	POLK
2	86700000	86800000	CLR,iHH12	3208.98212772,8.62528074703047	chr2	86690055	86705083	ENSSSCT00000015386	ENSSSCG00000014085	LOC102167207
2	86800000	86900000	CLR,iHH12	2978.2620432,8.35878328170613	chr2	86822106	86828910	ENSSSCT00000030319	ENSSSCG00000021392
2	86900000	87000000	CLR,iHH12	3065.74184375,6.64611285918062	chr2	86916823	87123635	ENSSSCT00000015388	ENSSSCG00000014087
2	87000000	87100000	CLR,iHH12	1412.38864806,5.02086869740063	chr2	86916823	87123635	ENSSSCT00000015388	ENSSSCG00000014087
2	87100000	87200000	CLR,iHH12	770.13568422,6.4217960761087	chr2	86916823	87123635	ENSSSCT00000015388	ENSSSCG00000014087
2	87100000	87200000	CLR,iHH12	770.13568422,6.4217960761087	chr2	87128323	87215914	ENSSSCT00000015389	ENSSSCG00000014088	IQGAP2
2	87100000	87200000	CLR,iHH12	770.13568422,6.4217960761087	chr2	87181040	87188670	ENSSSCT00000015390	ENSSSCG00000014089	F2RL2
2	87100000	87200000	CLR,iHH12	770.13568422,6.4217960761087	chr2	87186852	87191025	ENSSSCT00000036175	ENSSSCG00000014089	F2RL2
2	87200000	87300000	CLR,iHH12	633.71448342,7.79038360152077	chr2	87128323	87215914	ENSSSCT00000015389	ENSSSCG00000014088	IQGAP2
2	87200000	87300000	CLR,iHH12	633.71448342,7.79038360152077	chr2	87279784	87296140	ENSSSCT00000030688	ENSSSCG00000020672	F2R
2	87400000	87500000	CLR,iHH12	1546.38070357,5.56829885008017	chr2	87433505	87447099	ENSSSCT00000015394	ENSSSCG00000014093	CRHBP
2	87800000	87900000	CLR,iHH12	820.01674061,6.62453709227458	chr2	87819367	87934195	ENSSSCT00000015399	ENSSSCG00000014097	PDE8B
2	87900000	88000000	CLR,iHH12	3116.5330086,8.89098346778355	chr2	87819367	87934195	ENSSSCT00000015399	ENSSSCG00000014097	PDE8B
2	87900000	88000000	CLR,iHH12	3116.5330086,8.89098346778355	chr2	87929217	87988187	ENSSSCT00000015400	ENSSSCG00000014098	WDR41
2	88100000	88200000	CLR,iHH12	5525.1993892,8.96740280292149	chr2	88136873	88144853	ENSSSCT00000015401	ENSSSCG00000014099	OTP
2	88100000	88200000	CLR,iHH12	5525.1993892,8.96740280292149	chr2	88189091	88203028	ENSSSCT00000015402	ENSSSCG00000014100	TBCA
2	88200000	88300000	CLR,iHH12	5631.75339128,8.44600907874161	chr2	88189091	88203028	ENSSSCT00000015402	ENSSSCG00000014100	TBCA
2	88300000	88400000	CLR,iHH12	6751.53681058,8.50967121530708	chr2	88317665	88317746	ENSSSCT00000028669	ENSSSCG00000026911
2	88500000	88600000	CLR,iHH12	6364.94409724,8.85568442318986	chr2	88534983	88719629	ENSSSCT00000015403	ENSSSCG00000014101
2	88600000	88700000	CLR,iHH12	6198.93959867,8.85378529330528	chr2	88534983	88719629	ENSSSCT00000015403	ENSSSCG00000014101
2	88700000	88800000	CLR,iHH12	7097.29353372,8.89618543224999	chr2	88534983	88719629	ENSSSCT00000015403	ENSSSCG00000014101
2	88700000	88800000	CLR,iHH12	7097.29353372,8.89618543224999	chr2	88734257	88766632	ENSSSCT00000029238	ENSSSCG00000027810	LOC100736762
2	88800000	88900000	CLR,iHH12	6968.87589982,8.9614989861064	chr2	88879232	88972822	ENSSSCT00000027783	ENSSSCG00000028536	LHFPL2
2	88900000	89000000	CLR,iHH12	6133.49824172,9.01975273104407	chr2	88879232	88972822	ENSSSCT00000027783	ENSSSCG00000028536	LHFPL2
2	88900000	89000000	CLR,iHH12	6133.49824172,9.01975273104407	chr2	88983094	89035133	ENSSSCT00000015405	ENSSSCG00000014103
2	89000000	89100000	CLR,iHH12	5125.52799021,8.61342150660996	chr2	88983094	89035133	ENSSSCT00000015405	ENSSSCG00000014103
2	89000000	89100000	di,CLR	1.41854493071174,5125.52799021	chr2	88983094	89035133	ENSSSCT00000015405	ENSSSCG00000014103
2	89000000	89100000	di,iHH12	1.41854493071174,8.61342150660996	chr2	88983094	89035133	ENSSSCT00000015405	ENSSSCG00000014103
2	89200000	89300000	CLR,iHH12	703.37778842,8.4775924344307	chr2	89270224	89356834	ENSSSCT00000031398	ENSSSCG00000029280	LOC102158142
2	89300000	89400000	CLR,iHH12	811.05682435,8.44873391727165	chr2	89270224	89356834	ENSSSCT00000031398	ENSSSCG00000029280	LOC102158142
2	89300000	89400000	CLR,iHH12	811.05682435,8.44873391727165	chr2	89326899	89328332	ENSSSCT00000015407	ENSSSCG00000014105
2	89700000	89800000	CLR,iHH12	683.83270586,9.59591570967774	chr2	89767466	89810056	ENSSSCT00000015415	ENSSSCG00000014112
2	89800000	89900000	CLR,iHH12	1755.62257397,10.2410377458376	chr2	89767466	89810056	ENSSSCT00000015415	ENSSSCG00000014112
2	89800000	89900000	CLR,iHH12	1755.62257397,10.2410377458376	chr2	89844359	89996126	ENSSSCT00000015416	ENSSSCG00000014113	HOMER1
2	89900000	90000000	CLR,iHH12	2556.85678036,8.5271349531587	chr2	89844359	89996126	ENSSSCT00000015416	ENSSSCG00000014113	HOMER1
2	90100000	90200000	CLR,iHH12	1553.52949289,5.11399085693703	chr2	90128251	90181088	ENSSSCT00000015417	ENSSSCG00000014114	PAPD4
2	90100000	90200000	CLR,iHH12	1553.52949289,5.11399085693703	chr2	90194148	90229595	ENSSSCT00000024422	ENSSSCG00000026098	CMYA5
3	23500000	23600000	di,iHH12	2.27196835647034,6.26171658491333	chr3	23526113	23542872	ENSSSCT00000025945	ENSSSCG00000030424	USP31
3	23600000	23700000	di,iHH12	2.23030896961267,5.71737724318458	chr3	23601246	23601376	ENSSSCT00000025263	ENSSSCG00000023632
3	23600000	23700000	di,iHH12	2.23030896961267,5.71737724318458	chr3	23604730	23617579	ENSSSCT00000031593	ENSSSCG00000026544	LOC102162297
3	23600000	23700000	di,iHH12	2.23030896961267,5.71737724318458	chr3	23699305	23809986	ENSSSCT00000008587	ENSSSCG00000007837	HS3ST2
3	23700000	23800000	di,iHH12	1.70191291476716,5.17603770096481	chr3	23699305	23809986	ENSSSCT00000008587	ENSSSCG00000007837	HS3ST2
3	25900000	26000000	CLR,iHH12	705.52300349,5.30638957246246	chr3	25917433	25938640	ENSSSCT00000008603	ENSSSCG00000007853	LYRM1
3	25900000	26000000	CLR,iHH12	705.52300349,5.30638957246246	chr3	25968049	25972398	ENSSSCT00000008604	ENSSSCG00000007854	DCUN1D3
3	25900000	26000000	CLR,iHH12	705.52300349,5.30638957246246	chr3	25982706	26023372	ENSSSCT00000008605	ENSSSCG00000007855
3	25900000	26000000	di,CLR	1.91048199496504,705.52300349	chr3	25917433	25938640	ENSSSCT00000008603	ENSSSCG00000007853	LYRM1
3	25900000	26000000	di,CLR	1.91048199496504,705.52300349	chr3	25968049	25972398	ENSSSCT00000008604	ENSSSCG00000007854	DCUN1D3
3	25900000	26000000	di,CLR	1.91048199496504,705.52300349	chr3	25982706	26023372	ENSSSCT00000008605	ENSSSCG00000007855
3	25900000	26000000	di,iHH12	1.91048199496504,5.30638957246246	chr3	25917433	25938640	ENSSSCT00000008603	ENSSSCG00000007853	LYRM1
3	25900000	26000000	di,iHH12	1.91048199496504,5.30638957246246	chr3	25968049	25972398	ENSSSCT00000008604	ENSSSCG00000007854	DCUN1D3
3	25900000	26000000	di,iHH12	1.91048199496504,5.30638957246246	chr3	25982706	26023372	ENSSSCT00000008605	ENSSSCG00000007855
3	26000000	26100000	di,CLR	1.8521256252158,1256.24850498	chr3	25982706	26023372	ENSSSCT00000008605	ENSSSCG00000007855
3	26000000	26100000	di,CLR	1.8521256252158,1256.24850498	chr3	26022616	26026831	ENSSSCT00000025016	ENSSSCG00000022466	ERI2
3	26000000	26100000	di,CLR	1.8521256252158,1256.24850498	chr3	26031776	26061643	ENSSSCT00000008608	ENSSSCG00000007857	ACSM3
3	26000000	26100000	di,CLR	1.8521256252158,1256.24850498	chr3	26070074	26079765	ENSSSCT00000024527	ENSSSCG00000024748	THUMPD1
3	26000000	26100000	di,CLR	1.8521256252158,1256.24850498	chr3	26080589	26098264	ENSSSCT00000027442	ENSSSCG00000030033
3	49600000	49700000	di,CLR	1.3700374562813,1573.4857959	chr3	49603394	49624831	ENSSSCT00000008911	ENSSSCG00000008134	EDAR
3	49600000	49700000	di,CLR	1.3700374562813,1573.4857959	chr3	49632057	49685648	ENSSSCT00000008912	ENSSSCG00000008135	CCDC138
3	49600000	49700000	di,CLR	1.3700374562813,1573.4857959	chr3	49693955	49735090	ENSSSCT00000008913	ENSSSCG00000008136	RANBP2
3	49700000	49800000	di,CLR	1.77313962010073,2632.68201859	chr3	49693955	49735090	ENSSSCT00000008913	ENSSSCG00000008136	RANBP2
3	49700000	49800000	di,CLR	1.77313962010073,2632.68201859	chr3	49791511	49811977	ENSSSCT00000008914	ENSSSCG00000008137	LIMS1
3	50000000	50100000	di,CLR	2.19748698973046,3794.61640635	chr3	50008177	50034005	ENSSSCT00000027549	ENSSSCG00000028691	LOC100623656
3	51300000	51400000	di,CLR	1.60094063565991,3281.7657589	chr3	51391129	51413776	ENSSSCT00000008921	ENSSSCG00000008144	NCK2
3	51700000	51800000	di,CLR	1.88524865277207,597.77125262	chr3	51784302	51785412	ENSSSCT00000027509	ENSSSCG00000025772	GPR45
3	51700000	51800000	di,CLR	1.88524865277207,597.77125262	chr3	51797665	51848992	ENSSSCT00000024727	ENSSSCG00000024636	TGFBRAP1
3	51800000	51900000	di,CLR	1.81085757530585,1129.41530026	chr3	51797665	51848992	ENSSSCT00000024727	ENSSSCG00000024636	TGFBRAP1
3	51800000	51900000	di,CLR	1.81085757530585,1129.41530026	chr3	51854370	51857245	ENSSSCT00000023410	ENSSSCG00000029999
3	51800000	51900000	di,CLR	1.81085757530585,1129.41530026	chr3	51870393	51892837	ENSSSCT00000027534	ENSSSCG00000028020	MRPS9
3	53800000	53900000	di,CLR	1.85380476044423,12396.70375305	chr3	53861566	53918903	ENSSSCT00000008927	ENSSSCG00000008150	TMEM182
3	54000000	54100000	di,CLR	1.44907740336574,12219.62772721	chr3	53962451	54047092	ENSSSCT00000008930	ENSSSCG00000008153	SLC9A2
3	54100000	54200000	di,CLR	2.28792344695785,11381.45259572	chr3	54167228	54229024	ENSSSCT00000008932	ENSSSCG00000008155	SLC9A4
3	54200000	54300000	di,CLR	1.5737259424038,10978.8228759	chr3	54167228	54229024	ENSSSCT00000008932	ENSSSCG00000008155	SLC9A4
3	54200000	54300000	di,CLR	1.5737259424038,10978.8228759	chr3	54241696	54269515	ENSSSCT00000034710	ENSSSCG00000008157	IL18RAP
3	54200000	54300000	di,CLR	1.5737259424038,10978.8228759	chr3	54241878	54269535	ENSSSCT00000008934	ENSSSCG00000008157	IL18RAP
3	54200000	54300000	di,CLR	1.5737259424038,10978.8228759	chr3	54241878	54269535	ENSSSCT00000034786	ENSSSCG00000008157	IL18RAP
3	54200000	54300000	di,CLR	1.5737259424038,10978.8228759	chr3	54268550	54273967	ENSSSCT00000036414	ENSSSCG00000008157	IL18RAP
3	54200000	54300000	di,CLR	1.5737259424038,10978.8228759	chr3	54285205	54288704	ENSSSCT00000008935	ENSSSCG00000008158	IL-18RA
3	54300000	54400000	di,CLR	1.40817151832168,11140.53891659	chr3	54348355	54351447	ENSSSCT00000030062	ENSSSCG00000023550
3	54300000	54400000	di,CLR	1.40817151832168,11140.53891659	chr3	54374029	54518149	ENSSSCT00000008936	ENSSSCG00000008159	IL1RL1
3	54400000	54500000	di,CLR	1.86502398908171,10055.97862658	chr3	54374029	54518149	ENSSSCT00000008936	ENSSSCG00000008159	IL1RL1
3	54500000	54600000	di,CLR	3.51590751504971,10134.15552681	chr3	54374029	54518149	ENSSSCT00000008936	ENSSSCG00000008159	IL1RL1
3	54700000	54800000	di,CLR	2.03719701467435,8900.39977805	chr3	54729097	54758580	ENSSSCT00000008939	ENSSSCG00000008162	IL1R1
3	54700000	54800000	di,CLR	2.03719701467435,8900.39977805	chr3	54745412	54757579	ENSSSCT00000032991	ENSSSCG00000008162	IL1R1
3	55500000	55600000	di,CLR	2.1675298171046,4987.98206012	chr3	55465157	55518404	ENSSSCT00000008943	ENSSSCG00000008166	CREG2
3	55500000	55600000	di,CLR	2.1675298171046,4987.98206012	chr3	55578423	55605730	ENSSSCT00000008945	ENSSSCG00000008168	RNF149
3	55500000	55600000	di,CLR	2.1675298171046,4987.98206012	chr3	55594136	55600809	ENSSSCT00000033633	ENSSSCG00000008168	RNF149
3	55500000	55600000	di,CLR	2.1675298171046,4987.98206012	chr3	55594136	55605725	ENSSSCT00000032920	ENSSSCG00000008168	RNF149
3	55700000	55800000	di,CLR	2.08011870850012,3605.91499207	chr3	55676566	55841538	ENSSSCT00000008947	ENSSSCG00000008170	LOC100520127
3	55700000	55800000	di,CLR	2.08011870850012,3605.91499207	chr3	55777080	55834903	ENSSSCT00000008946	ENSSSCG00000008169	TBC1D8
3	56900000	57000000	di,CLR	1.43004994736689,1194.52436826	chr3	56762716	57197007	ENSSSCT00000008955	ENSSSCG00000008177
3	57000000	57100000	di,CLR	1.39809417009231,1171.89079633	chr3	56762716	57197007	ENSSSCT00000008955	ENSSSCG00000008177
3	57300000	57400000	di,CLR	2.09095604476185,801.25556396	chr3	57260837	57317438	ENSSSCT00000008956	ENSSSCG00000008178	AFF3
3	57300000	57400000	di,CLR	2.09095604476185,801.25556396	chr3	57369146	57499546	ENSSSCT00000008958	ENSSSCG00000008179	REV1
3	57400000	57500000	di,CLR	2.08832419612933,1189.59941905	chr3	57369146	57499546	ENSSSCT00000008958	ENSSSCG00000008179	REV1
3	57400000	57500000	di,CLR	2.08832419612933,1189.59941905	chr3	57496093	57541127	ENSSSCT00000008959	ENSSSCG00000008180	EIF5B
3	57400000	57500000	di,CLR	2.08832419612933,1189.59941905	chr3	57496093	57541127	ENSSSCT00000022947	ENSSSCG00000008180	EIF5B
3	81900000	82000000	di,CLR	1.39582895707541,764.87029306	chr3	81958719	81976616	ENSSSCT00000009161	ENSSSCG00000008367	LOC100519597
3	81900000	82000000	di,CLR	1.39582895707541,764.87029306	chr3	81976146	81989330	ENSSSCT00000009162	ENSSSCG00000008368	UGP2
3	84600000	84700000	di,CLR	1.41823208313867,1313.01499404	chr3	84642029	84662528	ENSSSCT00000027075	ENSSSCG00000028831
3	84600000	84700000	di,CLR	1.41823208313867,1313.01499404	chr3	84698895	84727009	ENSSSCT00000009183	ENSSSCG00000008386	LOC100739838
3	84700000	84800000	di,CLR	2.24707818784115,1493.43853962	chr3	84698895	84727009	ENSSSCT00000009183	ENSSSCG00000008386	LOC100739838
3	84800000	84900000	di,CLR	1.83225350984592,1031.11128663	chr3	84809461	84818172	ENSSSCT00000026564	ENSSSCG00000027414	KIAA1841
3	84800000	84900000	di,CLR	1.83225350984592,1031.11128663	chr3	84853141	84883654	ENSSSCT00000009184	ENSSSCG00000008387	PEX13
3	84800000	84900000	di,CLR	1.83225350984592,1031.11128663	chr3	84887667	84951737	ENSSSCT00000009182	ENSSSCG00000008385	PUS10
3	84900000	85000000	CLR,iHH12	1099.73762987,4.78086386460256	chr3	84887667	84951737	ENSSSCT00000009182	ENSSSCG00000008385	PUS10
3	84900000	85000000	CLR,iHH12	1099.73762987,4.78086386460256	chr3	84967853	85003436	ENSSSCT00000009185	ENSSSCG00000008388	REL
3	85000000	85100000	di,CLR	1.39412679230078,925.50329771	chr3	84967853	85003436	ENSSSCT00000009185	ENSSSCG00000008388	REL
3	85000000	85100000	di,CLR	1.39412679230078,925.50329771	chr3	85082447	85116899	ENSSSCT00000009186	ENSSSCG00000008389	PAPOLG
3	87800000	87900000	CLR,iHH12	489.41219773,6.10216971998358	chr3	87852188	87858129	ENSSSCT00000025004	ENSSSCG00000025251
4	39800000	39900000	CLR,iHH12	727.33696133,6.91430922004301	chr4	39853812	39957642	ENSSSCT00000006660	ENSSSCG00000006069	RGS22
4	39900000	40000000	CLR,iHH12	977.52143735,4.98409140496803	chr4	39853812	39957642	ENSSSCT00000006660	ENSSSCG00000006069	RGS22
4	39900000	40000000	CLR,iHH12	977.52143735,4.98409140496803	chr4	39990793	40005773	ENSSSCT00000006661	ENSSSCG00000006070	COX6C
4	90400000	90500000	di,iHH12	1.33775158145452,7.00742998701523	chr4	90392448	90408544	ENSSSCT00000006905	ENSSSCG00000006300	SFT2D2
4	90400000	90500000	di,iHH12	1.33775158145452,7.00742998701523	chr4	90433353	90469147	ENSSSCT00000006906	ENSSSCG00000006301	TIPRL
4	90600000	90700000	CLR,iHH12	593.20254866,7.64977823191817	chr4	90593307	90658483	ENSSSCT00000006908	ENSSSCG00000006303	DCAF6
4	90600000	90700000	CLR,iHH12	593.20254866,7.64977823191817	chr4	90660585	90669735	ENSSSCT00000030043	ENSSSCG00000020979
4	90600000	90700000	CLR,iHH12	593.20254866,7.64977823191817	chr4	90692767	90699934	ENSSSCT00000025175	ENSSSCG00000026219
4	90700000	90800000	CLR,iHH12	608.54341032,7.32040305324155	chr4	90745387	90767619	ENSSSCT00000006909	ENSSSCG00000006304	MPC2
4	90700000	90800000	CLR,iHH12	608.54341032,7.32040305324155	chr4	90781048	90880222	ENSSSCT00000006910	ENSSSCG00000006305	ADCY10
4	90800000	90900000	di,iHH12	1.34136731373772,9.1365216953238	chr4	90781048	90880222	ENSSSCT00000006910	ENSSSCG00000006305	ADCY10
4	90800000	90900000	di,iHH12	1.34136731373772,9.1365216953238	chr4	90894928	90894995	ENSSSCT00000021442	ENSSSCG00000019847
4	90900000	91000000	di,iHH12	1.51265730166515,12.0502995657098	chr4	90912660	90985309	ENSSSCT00000006911	ENSSSCG00000006306	MPZL1
4	90900000	91000000	di,iHH12	1.51265730166515,12.0502995657098	chr4	90996956	91079847	ENSSSCT00000006912	ENSSSCG00000006307	RCSD1
4	91000000	91100000	di,iHH12	1.3787106439228,10.7163087612628	chr4	90996956	91079847	ENSSSCT00000006912	ENSSSCG00000006307	RCSD1
4	91800000	91900000	di,iHH12	2.44057565998279,5.53279544259672	chr4	91806409	91825832	ENSSSCT00000006924	ENSSSCG00000006317	LOC100737481
4	91800000	91900000	di,iHH12	2.44057565998279,5.53279544259672	chr4	91887912	91902097	ENSSSCT00000006925	ENSSSCG00000006318	TADA1
5	49800000	49900000	CLR,iHH12	719.59245815,8.06251901971272	chr5	49802584	49832349	ENSSSCT00000032327	ENSSSCG00000000550	SMCO2
5	49800000	49900000	CLR,iHH12	719.59245815,8.06251901971272	chr5	49802584	49832349	ENSSSCT00000029305	ENSSSCG00000000550	SMCO2
5	49800000	49900000	CLR,iHH12	719.59245815,8.06251901971272	chr5	49802584	49832325	ENSSSCT00000000593	ENSSSCG00000000550	SMCO2
5	49800000	49900000	CLR,iHH12	719.59245815,8.06251901971272	chr5	49827229	49827331	ENSSSCT00000021793	ENSSSCG00000020198
5	49800000	49900000	CLR,iHH12	719.59245815,8.06251901971272	chr5	49898642	49972779	ENSSSCT00000000594	ENSSSCG00000000551	ARNTL2
5	49900000	50000000	CLR,iHH12	1242.27120877,6.98579288175266	chr5	49898642	49972779	ENSSSCT00000000594	ENSSSCG00000000551	ARNTL2
5	50000000	50100000	CLR,iHH12	1312.63754867,5.86787833228513	chr5	50042281	50073034	ENSSSCT00000029783	ENSSSCG00000022288	STK38L
5	50400000	50500000	di,CLR	2.47651267364162,582.54383511	chr5	50375619	50404718	ENSSSCT00000031326	ENSSSCG00000030443	C5H12orf11
5	55000000	55100000	CLR,iHH12	1259.13518385,4.75069453496883	chr5	55086947	55108253	ENSSSCT00000000620	ENSSSCG00000000576	LOC102161427
5	55000000	55100000	di,CLR	1.96558615384125,1259.13518385	chr5	55086947	55108253	ENSSSCT00000000620	ENSSSCG00000000576	LOC102161427
5	55000000	55100000	di,iHH12	1.96558615384125,4.75069453496883	chr5	55086947	55108253	ENSSSCT00000000620	ENSSSCG00000000576	LOC102161427
5	55100000	55200000	CLR,iHH12	690.80958884,5.71425091822757	chr5	55086947	55108253	ENSSSCT00000000620	ENSSSCG00000000576	LOC102161427
5	55100000	55200000	CLR,iHH12	690.80958884,5.71425091822757	chr5	55138958	55191703	ENSSSCT00000000621	ENSSSCG00000000577	GYS2
5	55200000	55300000	CLR,iHH12	1595.40602498,7.11861362210027	chr5	55215629	55229499	ENSSSCT00000000623	ENSSSCG00000000579	GOLT1B
5	55200000	55300000	CLR,iHH12	1595.40602498,7.11861362210027	chr5	55229614	55272155	ENSSSCT00000000624	ENSSSCG00000000580	RECQL
5	55200000	55300000	CLR,iHH12	1595.40602498,7.11861362210027	chr5	55270408	55298002	ENSSSCT00000000627	ENSSSCG00000000583	PYROXD1
5	55200000	55300000	di,CLR	1.67549085229772,1595.40602498	chr5	55215629	55229499	ENSSSCT00000000623	ENSSSCG00000000579	GOLT1B
5	55200000	55300000	di,CLR	1.67549085229772,1595.40602498	chr5	55229614	55272155	ENSSSCT00000000624	ENSSSCG00000000580	RECQL
5	55200000	55300000	di,CLR	1.67549085229772,1595.40602498	chr5	55270408	55298002	ENSSSCT00000000627	ENSSSCG00000000583	PYROXD1
5	55200000	55300000	di,iHH12	1.67549085229772,7.11861362210027	chr5	55215629	55229499	ENSSSCT00000000623	ENSSSCG00000000579	GOLT1B
5	55200000	55300000	di,iHH12	1.67549085229772,7.11861362210027	chr5	55229614	55272155	ENSSSCT00000000624	ENSSSCG00000000580	RECQL
5	55200000	55300000	di,iHH12	1.67549085229772,7.11861362210027	chr5	55270408	55298002	ENSSSCT00000000627	ENSSSCG00000000583	PYROXD1
5	55300000	55400000	CLR,iHH12	1816.33083159,5.53633566841415	chr5	55323599	55326804	ENSSSCT00000000626	ENSSSCG00000000582
5	55300000	55400000	CLR,iHH12	1816.33083159,5.53633566841415	chr5	55358014	55405412	ENSSSCT00000000629	ENSSSCG00000000584
5	55300000	55400000	di,CLR	2.02104318654056,1816.33083159	chr5	55323599	55326804	ENSSSCT00000000626	ENSSSCG00000000582
5	55300000	55400000	di,CLR	2.02104318654056,1816.33083159	chr5	55358014	55405412	ENSSSCT00000000629	ENSSSCG00000000584
5	55300000	55400000	di,iHH12	2.02104318654056,5.53633566841415	chr5	55323599	55326804	ENSSSCT00000000626	ENSSSCG00000000582
5	55300000	55400000	di,iHH12	2.02104318654056,5.53633566841415	chr5	55358014	55405412	ENSSSCT00000000629	ENSSSCG00000000584
5	57800000	57900000	di,iHH12	2.00401369784568,12.0725709921496	chr5	57747751	58107859	ENSSSCT00000027538	ENSSSCG00000000591	PIK3C2G
5	57800000	57900000	di,iHH12	2.00401369784568,12.0725709921496	chr5	57747751	58107859	ENSSSCT00000031285	ENSSSCG00000000591	PIK3C2G
5	57800000	57900000	di,iHH12	2.00401369784568,12.0725709921496	chr5	57747751	58107859	ENSSSCT00000000636	ENSSSCG00000000591	PIK3C2G
5	57900000	58000000	di,iHH12	1.84914637785604,10.1393841647023	chr5	57747751	58107859	ENSSSCT00000027538	ENSSSCG00000000591	PIK3C2G
5	57900000	58000000	di,iHH12	1.84914637785604,10.1393841647023	chr5	57747751	58107859	ENSSSCT00000031285	ENSSSCG00000000591	PIK3C2G
5	57900000	58000000	di,iHH12	1.84914637785604,10.1393841647023	chr5	57747751	58107859	ENSSSCT00000000636	ENSSSCG00000000591	PIK3C2G
5	58000000	58100000	di,iHH12	1.85607988451214,9.33976643795271	chr5	57747751	58107859	ENSSSCT00000027538	ENSSSCG00000000591	PIK3C2G
5	58000000	58100000	di,iHH12	1.85607988451214,9.33976643795271	chr5	57747751	58107859	ENSSSCT00000031285	ENSSSCG00000000591	PIK3C2G
5	58000000	58100000	di,iHH12	1.85607988451214,9.33976643795271	chr5	57747751	58107859	ENSSSCT00000000636	ENSSSCG00000000591	PIK3C2G
5	58100000	58200000	CLR,iHH12	553.34301738,9.11209448122875	chr5	57747751	58107859	ENSSSCT00000027538	ENSSSCG00000000591	PIK3C2G
5	58100000	58200000	CLR,iHH12	553.34301738,9.11209448122875	chr5	57747751	58107859	ENSSSCT00000031285	ENSSSCG00000000591	PIK3C2G
5	58100000	58200000	CLR,iHH12	553.34301738,9.11209448122875	chr5	57747751	58107859	ENSSSCT00000000636	ENSSSCG00000000591	PIK3C2G
5	58100000	58200000	CLR,iHH12	553.34301738,9.11209448122875	chr5	58163511	58164713	ENSSSCT00000000638	ENSSSCG00000000593
5	58100000	58200000	di,CLR	1.56847372624171,553.34301738	chr5	57747751	58107859	ENSSSCT00000027538	ENSSSCG00000000591	PIK3C2G
5	58100000	58200000	di,CLR	1.56847372624171,553.34301738	chr5	57747751	58107859	ENSSSCT00000031285	ENSSSCG00000000591	PIK3C2G
5	58100000	58200000	di,CLR	1.56847372624171,553.34301738	chr5	57747751	58107859	ENSSSCT00000000636	ENSSSCG00000000591	PIK3C2G
5	58100000	58200000	di,CLR	1.56847372624171,553.34301738	chr5	58163511	58164713	ENSSSCT00000000638	ENSSSCG00000000593
5	58100000	58200000	di,iHH12	1.56847372624171,9.11209448122875	chr5	57747751	58107859	ENSSSCT00000027538	ENSSSCG00000000591	PIK3C2G
5	58100000	58200000	di,iHH12	1.56847372624171,9.11209448122875	chr5	57747751	58107859	ENSSSCT00000031285	ENSSSCG00000000591	PIK3C2G
5	58100000	58200000	di,iHH12	1.56847372624171,9.11209448122875	chr5	57747751	58107859	ENSSSCT00000000636	ENSSSCG00000000591	PIK3C2G
5	58100000	58200000	di,iHH12	1.56847372624171,9.11209448122875	chr5	58163511	58164713	ENSSSCT00000000638	ENSSSCG00000000593
5	58200000	58300000	CLR,iHH12	836.43274848,8.11026562213682	chr5	58236574	58242816	ENSSSCT00000000639	ENSSSCG00000000594	RERGL
5	58200000	58300000	di,CLR	1.43852269750195,836.43274848	chr5	58236574	58242816	ENSSSCT00000000639	ENSSSCG00000000594	RERGL
5	58200000	58300000	di,iHH12	1.43852269750195,8.11026562213682	chr5	58236574	58242816	ENSSSCT00000000639	ENSSSCG00000000594	RERGL
5	69300000	69400000	CLR,iHH12	1318.96593247,4.78510047244887	chr5	69219129	69394433	ENSSSCT00000000798	ENSSSCG00000000735	TSPAN9
5	70000000	70100000	CLR,iHH12	725.61425493,5.53243419506432	chr5	70002214	70085844	ENSSSCT00000023353	ENSSSCG00000029464	KDM5A
5	70000000	70100000	CLR,iHH12	725.61425493,5.53243419506432	chr5	70039498	70049296	ENSSSCT00000022573	ENSSSCG00000020797
5	70000000	70100000	CLR,iHH12	725.61425493,5.53243419506432	chr5	70053611	70069657	ENSSSCT00000027222	ENSSSCG00000027540
6	31700000	31800000	di,CLR	2.02686893626422,1446.42375169	chr6	31799736	31809746	ENSSSCT00000027699	ENSSSCG00000027276
6	32800000	32900000	di,CLR	2.12169641133555,2266.44897902	chr6	32866058	32907567	ENSSSCT00000003148	ENSSSCG00000002847	GPT2
6	33000000	33100000	di,CLR	2.482171437,2254.79062819	chr6	33099683	33107320	ENSSSCT00000026506	ENSSSCG00000022333	LOC100626752
6	64500000	64600000	CLR,iHH12	2267.97409701,4.76263662520951	chr6	64444215	64593489	ENSSSCT00000003773	ENSSSCG00000003401	KIF1B
6	64500000	64600000	CLR,iHH12	2267.97409701,4.76263662520951	chr6	64545530	64545633	ENSSSCT00000020185	ENSSSCG00000018590
6	64600000	64700000	CLR,iHH12	1032.09093734,4.90850086830887	chr6	64609320	64625096	ENSSSCT00000003774	ENSSSCG00000003402	PGD
6	64600000	64700000	CLR,iHH12	1032.09093734,4.90850086830887	chr6	64634413	64644536	ENSSSCT00000003776	ENSSSCG00000003403	APITD1
6	64600000	64700000	CLR,iHH12	1032.09093734,4.90850086830887	chr6	64649452	64650803	ENSSSCT00000003775	ENSSSCG00000027822	CORT
6	64600000	64700000	CLR,iHH12	1032.09093734,4.90850086830887	chr6	64657727	64669107	ENSSSCT00000003777	ENSSSCG00000003404	DFFA
6	64600000	64700000	CLR,iHH12	1032.09093734,4.90850086830887	chr6	64670699	64805061	ENSSSCT00000003778	ENSSSCG00000003405	PEX14
6	64700000	64800000	CLR,iHH12	2237.60729336,5.21498828666779	chr6	64670699	64805061	ENSSSCT00000003778	ENSSSCG00000003405	PEX14
6	64800000	64900000	CLR,iHH12	2492.24371273,5.13945925672533	chr6	64670699	64805061	ENSSSCT00000003778	ENSSSCG00000003405	PEX14
6	64800000	64900000	CLR,iHH12	2492.24371273,5.13945925672533	chr6	64851364	64857266	ENSSSCT00000003780	ENSSSCG00000003407	LOC100621849
6	65500000	65600000	CLR,iHH12	1182.47679864,4.72945785036197	chr6	65512780	65547887	ENSSSCT00000003790	ENSSSCG00000003417	PTCHD2
6	75200000	75300000	di,CLR	3.32837030531941,1048.12029873	chr6	75260272	75261865	ENSSSCT00000026348	ENSSSCG00000023761	LOC100620404
6	79000000	79100000	di,iHH12	2.1463984035208,4.75130349509486	chr6	79016672	79043802	ENSSSCT00000029698	ENSSSCG00000028809	DNAJC8
6	79000000	79100000	di,iHH12	2.1463984035208,4.75130349509486	chr6	79031108	79031224	ENSSSCT00000031540	ENSSSCG00000029682
6	79000000	79100000	di,iHH12	2.1463984035208,4.75130349509486	chr6	79045744	79047942	ENSSSCT00000029874	ENSSSCG00000027072	ATPIF1
6	79000000	79100000	di,iHH12	2.1463984035208,4.75130349509486	chr6	79067102	79087543	ENSSSCT00000022902	ENSSSCG00000029438	SESN2
6	86600000	86700000	di,iHH12	2.31522783286077,8.33263928171904	chr6	86652473	86652932	ENSSSCT00000004037	ENSSSCG00000003641	MTF1
6	86600000	86700000	di,iHH12	2.31522783286077,8.33263928171904	chr6	86656664	86715040	ENSSSCT00000004038	ENSSSCG00000003642
6	86700000	86800000	CLR,iHH12	738.22300538,7.77229275218928	chr6	86656664	86715040	ENSSSCT00000004038	ENSSSCG00000003642
6	86700000	86800000	CLR,iHH12	738.22300538,7.77229275218928	chr6	86702442	86702771	ENSSSCT00000021485	ENSSSCG00000019890
6	86700000	86800000	CLR,iHH12	738.22300538,7.77229275218928	chr6	86722219	86747074	ENSSSCT00000004039	ENSSSCG00000003643	SF3A3
6	86700000	86800000	CLR,iHH12	738.22300538,7.77229275218928	chr6	86751332	86758637	ENSSSCT00000004040	ENSSSCG00000003644	FHL3
6	86700000	86800000	CLR,iHH12	738.22300538,7.77229275218928	chr6	86764291	86777598	ENSSSCT00000004041	ENSSSCG00000003645	UTP11L
6	86700000	86800000	CLR,iHH12	738.22300538,7.77229275218928	chr6	86797829	86800967	ENSSSCT00000004042	ENSSSCG00000003646	POU3F3
6	111900000	112000000	di,iHH12	1.90785814279646,6.61770848177657	chr6	111754678	112008944	ENSSSCT00000032735	ENSSSCG00000003743	GALNT1
6	111900000	112000000	di,iHH12	1.90785814279646,6.61770848177657	chr6	111925505	112006884	ENSSSCT00000004144	ENSSSCG00000003743	GALNT1
6	112200000	112300000	CLR,iHH12	723.46632384,6.82820730421941	chr6	112261415	112271468	ENSSSCT00000031519	ENSSSCG00000030002	C6H18orf21
6	112200000	112300000	CLR,iHH12	723.46632384,6.82820730421941	chr6	112288547	112359880	ENSSSCT00000028030	ENSSSCG00000027700	RPRD1A
6	112600000	112700000	di,CLR	1.64065437706875,1289.75129188	chr6	112593222	112614675	ENSSSCT00000004146	ENSSSCG00000026522	LOC100520083
7	14000000	14100000	CLR,iHH12	591.35090947,6.98071477358305	chr7	14013387	14052973	ENSSSCT00000001163	ENSSSCG00000001068	CAP2
7	14000000	14100000	CLR,iHH12	591.35090947,6.98071477358305	chr7	14080339	14089959	ENSSSCT00000001165	ENSSSCG00000001070	FAM8A1
7	14000000	14100000	CLR,iHH12	591.35090947,6.98071477358305	chr7	14095626	14168650	ENSSSCT00000025406	ENSSSCG00000026034	NUP153
7	14100000	14200000	CLR,iHH12	619.1053387,6.36704902572632	chr7	14095626	14168650	ENSSSCT00000025406	ENSSSCG00000026034	NUP153
7	63500000	63600000	di,iHH12	2.26290780274631,4.78678832413379	chr7	63517281	63583551	ENSSSCT00000002132	ENSSSCG00000001903	EDC3
7	63500000	63600000	di,iHH12	2.26290780274631,4.78678832413379	chr7	63583920	63598452	ENSSSCT00000002133	ENSSSCG00000001904	CLK3
7	65100000	65200000	di,iHH12	2.93417641786976,5.49454730451131	chr7	65150182	65267689	ENSSSCT00000002153	ENSSSCG00000001924	BBS4
7	65100000	65200000	di,iHH12	2.93417641786976,5.49454730451131	chr7	65167883	65205814	ENSSSCT00000002151	ENSSSCG00000001922
7	80900000	81000000	di,CLR	1.52245789323378,1672.54692535	chr7	80925213	80928414	ENSSSCT00000022671	ENSSSCG00000026237	LOC100516275
7	80900000	81000000	di,CLR	1.52245789323378,1672.54692535	chr7	80943527	80952409	ENSSSCT00000023738	ENSSSCG00000028190	HOMEZ
7	80900000	81000000	di,CLR	1.52245789323378,1672.54692535	chr7	80963507	80964649	ENSSSCT00000002260	ENSSSCG00000002021	PPP1R3E
7	80900000	81000000	di,CLR	1.52245789323378,1672.54692535	chr7	80971089	80972334	ENSSSCT00000002262	ENSSSCG00000002022	BCL2L2
7	80900000	81000000	di,CLR	1.52245789323378,1672.54692535	chr7	80984359	80988312	ENSSSCT00000002263	ENSSSCG00000002023	PABPN1
7	80900000	81000000	di,CLR	1.52245789323378,1672.54692535	chr7	80999610	81006075	ENSSSCT00000002265	ENSSSCG00000002025	SLC22A17
7	81200000	81300000	di,CLR	1.3702634254963,1545.684364	chr7	81224132	81224238	ENSSSCT00000025044	ENSSSCG00000023430
7	81200000	81300000	di,CLR	1.3702634254963,1545.684364	chr7	81241894	81256009	ENSSSCT00000002274	ENSSSCG00000002032	LOC100522330
7	81200000	81300000	di,CLR	1.3702634254963,1545.684364	chr7	81241994	81260081	ENSSSCT00000028312	ENSSSCG00000002032	LOC100522330
7	81200000	81300000	di,CLR	1.3702634254963,1545.684364	chr7	81266198	81267897	ENSSSCT00000002275	ENSSSCG00000002033	CEBPE
7	81200000	81300000	di,CLR	1.3702634254963,1545.684364	chr7	81284414	81284843	ENSSSCT00000002277	ENSSSCG00000002035	C7H14orf119
7	81200000	81300000	di,CLR	1.3702634254963,1545.684364	chr7	81287005	81325218	ENSSSCT00000002276	ENSSSCG00000002034	ACIN1
8	108900000	109000000	di,iHH12	1.51982276546052,5.42199148529818	chr8	108893586	109077862	ENSSSCT00000009956	ENSSSCG00000009090	KIAA1109
8	123200000	123300000	CLR,iHH12	6646.81578726,8.229557814419	chr8	123220070	123220182	ENSSSCT00000022160	ENSSSCG00000020565
8	123200000	123300000	CLR,iHH12	6646.81578726,8.229557814419	chr8	123274616	123279223	ENSSSCT00000010023	ENSSSCG00000009153	DKK2
9	53600000	53700000	di,CLR	1.54462783020873,2927.20713707	chr9	53693576	53825971	ENSSSCT00000031058	ENSSSCG00000026007	SORL1
9	53700000	53800000	di,CLR	2.58059704486019,3521.19039172	chr9	53693576	53825971	ENSSSCT00000031058	ENSSSCG00000026007	SORL1
9	53800000	53900000	di,CLR	1.40128045362316,3467.26314588	chr9	53693576	53825971	ENSSSCT00000031058	ENSSSCG00000026007	SORL1
9	53800000	53900000	di,CLR	1.40128045362316,3467.26314588	chr9	53830780	53907681	ENSSSCT00000016501	ENSSSCG00000015135	LOC100626812
9	55000000	55100000	di,CLR	1.64337496400309,664.83011745	chr9	54975988	55118138	ENSSSCT00000016502	ENSSSCG00000015136	UBASH3B
9	62800000	62900000	CLR,iHH12	672.86870324,6.37899714450798	chr9	62797347	62803102	ENSSSCT00000016610	ENSSSCG00000015241	TMEM45B
9	62800000	62900000	CLR,iHH12	672.86870324,6.37899714450798	chr9	62806123	62809058	ENSSSCT00000016611	ENSSSCG00000015242	LOC100517179
9	62800000	62900000	CLR,iHH12	672.86870324,6.37899714450798	chr9	62817616	62822763	ENSSSCT00000030090	ENSSSCG00000021545	LOC102165033
9	62800000	62900000	CLR,iHH12	672.86870324,6.37899714450798	chr9	62880783	62960253	ENSSSCT00000016612	ENSSSCG00000015243	PRDM10
9	62800000	62900000	di,CLR	1.9140884061849,672.86870324	chr9	62797347	62803102	ENSSSCT00000016610	ENSSSCG00000015241	TMEM45B
9	62800000	62900000	di,CLR	1.9140884061849,672.86870324	chr9	62806123	62809058	ENSSSCT00000016611	ENSSSCG00000015242	LOC100517179
9	62800000	62900000	di,CLR	1.9140884061849,672.86870324	chr9	62817616	62822763	ENSSSCT00000030090	ENSSSCG00000021545	LOC102165033
9	62800000	62900000	di,CLR	1.9140884061849,672.86870324	chr9	62880783	62960253	ENSSSCT00000016612	ENSSSCG00000015243	PRDM10
9	62800000	62900000	di,iHH12	1.9140884061849,6.37899714450798	chr9	62797347	62803102	ENSSSCT00000016610	ENSSSCG00000015241	TMEM45B
9	62800000	62900000	di,iHH12	1.9140884061849,6.37899714450798	chr9	62806123	62809058	ENSSSCT00000016611	ENSSSCG00000015242	LOC100517179
9	62800000	62900000	di,iHH12	1.9140884061849,6.37899714450798	chr9	62817616	62822763	ENSSSCT00000030090	ENSSSCG00000021545	LOC102165033
9	62800000	62900000	di,iHH12	1.9140884061849,6.37899714450798	chr9	62880783	62960253	ENSSSCT00000016612	ENSSSCG00000015243	PRDM10
9	62900000	63000000	di,CLR	2.36009365875591,551.50789357	chr9	62880783	62960253	ENSSSCT00000016612	ENSSSCG00000015243	PRDM10
9	62900000	63000000	di,CLR	2.36009365875591,551.50789357	chr9	62965067	63035190	ENSSSCT00000016613	ENSSSCG00000015244	APLP2
9	63700000	63800000	di,iHH12	2.44059314992273,7.21538185871519	chr9	63746411	63746925	ENSSSCT00000016620	ENSSSCG00000015251
9	63700000	63800000	di,iHH12	2.44059314992273,7.21538185871519	chr9	63790484	63829935	ENSSSCT00000016621	ENSSSCG00000015252	SNX19
9	70100000	70200000	CLR,iHH12	506.75695702,8.72943357129802	chr9	70088605	70126311	ENSSSCT00000016636	ENSSSCG00000015267	FMO2
9	70100000	70200000	CLR,iHH12	506.75695702,8.72943357129802	chr9	70137791	70171698	ENSSSCT00000016637	ENSSSCG00000015268	FMO1
9	70200000	70300000	CLR,iHH12	805.9353532,8.37615412733513	chr9	70202768	70221216	ENSSSCT00000016635	ENSSSCG00000015266	FMO4
9	70800000	70900000	CLR,iHH12	1209.79779243,6.17002576837749	chr9	70784155	70815137	ENSSSCT00000024637	ENSSSCG00000028069	ATP2B4
9	70800000	70900000	CLR,iHH12	1209.79779243,6.17002576837749	chr9	70816025	70821128	ENSSSCT00000030950	ENSSSCG00000022036	LAX1
9	70800000	70900000	CLR,iHH12	1209.79779243,6.17002576837749	chr9	70869461	70872407	ENSSSCT00000016643	ENSSSCG00000015274	LOC100523914
9	70800000	70900000	CLR,iHH12	1209.79779243,6.17002576837749	chr9	70877651	70903649	ENSSSCT00000027953	ENSSSCG00000028035	ZC3H11A
9	70900000	71000000	CLR,iHH12	778.3898682,4.74377096797659	chr9	70877651	70903649	ENSSSCT00000027953	ENSSSCG00000028035	ZC3H11A
9	70900000	71000000	CLR,iHH12	778.3898682,4.74377096797659	chr9	70909004	70915566	ENSSSCT00000023057	ENSSSCG00000023562	SNRPE
9	75500000	75600000	CLR,iHH12	518.20850205,12.6648022610241	chr9	75596467	75596577	ENSSSCT00000020127	ENSSSCG00000018532
9	75500000	75600000	di,CLR	1.75513607463145,518.20850205	chr9	75596467	75596577	ENSSSCT00000020127	ENSSSCG00000018532
9	75500000	75600000	di,iHH12	1.75513607463145,12.6648022610241	chr9	75596467	75596577	ENSSSCT00000020127	ENSSSCG00000018532
9	75900000	76000000	CLR,iHH12	763.04090088,6.344313046428	chr9	75921395	75930836	ENSSSCT00000016671	ENSSSCG00000015300	ZNF804B
9	76900000	77000000	di,iHH12	2.57635018385834,13.6027401934467	chr9	76903099	76934926	ENSSSCT00000028779	ENSSSCG00000015302
9	76900000	77000000	di,iHH12	2.57635018385834,13.6027401934467	chr9	76903099	76929305	ENSSSCT00000016673	ENSSSCG00000015302
9	77000000	77100000	di,iHH12	2.3488070228814,11.6150945878261	chr9	77000787	77006411	ENSSSCT00000016679	ENSSSCG00000015306	CLDN12
9	77000000	77100000	di,iHH12	2.3488070228814,11.6150945878261	chr9	77018778	77046296	ENSSSCT00000016677	ENSSSCG00000015305	GTPBP10
9	77000000	77100000	di,iHH12	2.3488070228814,11.6150945878261	chr9	77024700	77024791	ENSSSCT00000022177	ENSSSCG00000020582
9	77000000	77100000	di,iHH12	2.3488070228814,11.6150945878261	chr9	77070586	77070982	ENSSSCT00000016675	ENSSSCG00000015304
9	77000000	77100000	di,iHH12	2.3488070228814,11.6150945878261	chr9	77078548	77083335	ENSSSCT00000016674	ENSSSCG00000015303	LOC100736853
9	77000000	77100000	di,iHH12	2.3488070228814,11.6150945878261	chr9	77085511	77086968	ENSSSCT00000025128	ENSSSCG00000026491
9	77500000	77600000	CLR,iHH12	727.66344931,6.24147020892648	chr9	77278115	77865575	ENSSSCT00000016680	ENSSSCG00000015307
9	77600000	77700000	CLR,iHH12	1253.67769039,5.25665438838386	chr9	77278115	77865575	ENSSSCT00000016680	ENSSSCG00000015307
9	77600000	77700000	di,CLR	1.35124763858496,1253.67769039	chr9	77278115	77865575	ENSSSCT00000016680	ENSSSCG00000015307
9	77600000	77700000	di,iHH12	1.35124763858496,5.25665438838386	chr9	77278115	77865575	ENSSSCT00000016680	ENSSSCG00000015307
9	77800000	77900000	di,CLR	1.43567163349418,2227.15657092	chr9	77278115	77865575	ENSSSCT00000016680	ENSSSCG00000015307
9	78600000	78700000	di,CLR	1.55534024600616,4683.94458773	chr9	78631027	78789783	ENSSSCT00000016683	ENSSSCG00000015310	AKAP9
9	78600000	78700000	di,CLR	1.55534024600616,4683.94458773	chr9	78652345	78791245	ENSSSCT00000023446	ENSSSCG00000015310	AKAP9
9	78600000	78700000	di,CLR	1.55534024600616,4683.94458773	chr9	78681489	78791245	ENSSSCT00000025278	ENSSSCG00000015310	AKAP9
9	78700000	78800000	di,CLR	2.21629571703463,5348.1453509	chr9	78631027	78789783	ENSSSCT00000016683	ENSSSCG00000015310	AKAP9
9	78700000	78800000	di,CLR	2.21629571703463,5348.1453509	chr9	78652345	78791245	ENSSSCT00000023446	ENSSSCG00000015310	AKAP9
9	78700000	78800000	di,CLR	2.21629571703463,5348.1453509	chr9	78681489	78791245	ENSSSCT00000025278	ENSSSCG00000015310	AKAP9
9	78700000	78800000	di,CLR	2.21629571703463,5348.1453509	chr9	78792884	78814967	ENSSSCT00000016684	ENSSSCG00000015311	CYP51
9	78900000	79000000	di,CLR	2.45452255735825,6241.76057788	chr9	78873033	78909021	ENSSSCT00000016686	ENSSSCG00000015313	KRIT1
9	78900000	79000000	di,CLR	2.45452255735825,6241.76057788	chr9	78959289	79055645	ENSSSCT00000016687	ENSSSCG00000015314	ANKIB1
9	78900000	79000000	di,CLR	2.45452255735825,6241.76057788	chr9	78978983	78979062	ENSSSCT00000021502	ENSSSCG00000019907
9	79000000	79100000	di,CLR	2.2808779008057,6529.1775098	chr9	78959289	79055645	ENSSSCT00000016687	ENSSSCG00000015314	ANKIB1
9	79000000	79100000	di,CLR	2.2808779008057,6529.1775098	chr9	79018273	79018380	ENSSSCT00000032346	ENSSSCG00000030482
9	79000000	79100000	di,CLR	2.2808779008057,6529.1775098	chr9	79065265	79081497	ENSSSCT00000024868	ENSSSCG00000027356	LOC100626054
9	79000000	79100000	di,CLR	2.2808779008057,6529.1775098	chr9	79066646	79066738	ENSSSCT00000020015	ENSSSCG00000018420
9	79000000	79100000	di,CLR	2.2808779008057,6529.1775098	chr9	79088509	79098739	ENSSSCT00000023860	ENSSSCG00000025577	GATAD1
9	79400000	79500000	di,CLR	2.22423432775048,7215.05797125	chr9	79471480	79471592	ENSSSCT00000020784	ENSSSCG00000019189
9	79400000	79500000	di,CLR	2.22423432775048,7215.05797125	chr9	79476430	79480038	ENSSSCT00000016691	ENSSSCG00000015318	LOC100518921
9	79400000	79500000	di,CLR	2.22423432775048,7215.05797125	chr9	79476810	79477631	ENSSSCT00000034946	ENSSSCG00000015318	LOC100518921
9	79400000	79500000	di,CLR	2.22423432775048,7215.05797125	chr9	79476812	79480047	ENSSSCT00000035327	ENSSSCG00000015318	LOC100518921
9	79600000	79700000	di,CLR	1.47880609648608,6734.10456414	chr9	79679835	79684587	ENSSSCT00000029122	ENSSSCG00000027372	SAMD9
9	79900000	80000000	di,CLR	1.95593168101164,6236.77789002	chr9	79907166	79910241	ENSSSCT00000030423	ENSSSCG00000024702
9	79900000	80000000	di,CLR	1.95593168101164,6236.77789002	chr9	79940985	79965334	ENSSSCT00000031022	ENSSSCG00000027092
9	79900000	80000000	di,CLR	1.95593168101164,6236.77789002	chr9	79997090	80002931	ENSSSCT00000028924	ENSSSCG00000024381
9	80000000	80100000	di,CLR	1.33837883682188,5734.15141383	chr9	79997090	80002931	ENSSSCT00000028924	ENSSSCG00000024381
9	80000000	80100000	di,CLR	1.33837883682188,5734.15141383	chr9	80003876	80009850	ENSSSCT00000028060	ENSSSCG00000028708
9	80000000	80100000	di,CLR	1.33837883682188,5734.15141383	chr9	80084576	80091776	ENSSSCT00000032573	ENSSSCG00000022982	CCDC132
9	81300000	81400000	di,CLR	1.88447252351425,3766.31235169	chr9	81357191	81393120	ENSSSCT00000016699	ENSSSCG00000015326	COL1A2
9	83100000	83200000	di,CLR	1.52394183644131,3870.06279583	chr9	82792691	83172175	ENSSSCT00000016708	ENSSSCG00000015335	DYNC1I1
9	83100000	83200000	di,CLR	1.52394183644131,3870.06279583	chr9	83194774	83350961	ENSSSCT00000016709	ENSSSCG00000015336	SLC25A13
9	83300000	83400000	di,CLR	1.66907869309545,5255.89280906	chr9	83194774	83350961	ENSSSCT00000016709	ENSSSCG00000015336	SLC25A13
9	85500000	85600000	CLR,iHH12	1198.90712516,6.42368346426483	chr9	85516980	85547868	ENSSSCT00000016716	ENSSSCG00000015343	MIOS
9	85800000	85900000	CLR,iHH12	1719.13732639,7.76455173363803	chr9	85856737	85940218	ENSSSCT00000016718	ENSSSCG00000015345	GLCCI1
9	85900000	86000000	CLR,iHH12	1565.76285931,7.70815583315266	chr9	85856737	85940218	ENSSSCT00000016718	ENSSSCG00000015345	GLCCI1
9	85900000	86000000	CLR,iHH12	1565.76285931,7.70815583315266	chr9	85968569	86007216	ENSSSCT00000028364	ENSSSCG00000021298	ICA1
9	86000000	86100000	CLR,iHH12	756.41653901,7.74176217502315	chr9	85968569	86007216	ENSSSCT00000028364	ENSSSCG00000021298	ICA1
9	86000000	86100000	CLR,iHH12	756.41653901,7.74176217502315	chr9	86076124	86076278	ENSSSCT00000021762	ENSSSCG00000020167
9	86600000	86700000	CLR,iHH12	878.12404774,7.82561288797028	chr9	86607782	86609535	ENSSSCT00000016722	ENSSSCG00000015348	NXPH1
9	87800000	87900000	CLR,iHH12	1650.01765574,7.44615847994611	chr9	87804693	87804789	ENSSSCT00000021749	ENSSSCG00000020154
9	87800000	87900000	CLR,iHH12	1650.01765574,7.44615847994611	chr9	87822347	87822632	ENSSSCT00000023140	ENSSSCG00000021517
9	88500000	88600000	CLR,iHH12	1856.89969653,7.32564630314026	chr9	88555976	88562999	ENSSSCT00000028465	ENSSSCG00000024313	NDUFA4
9	88500000	88600000	CLR,iHH12	1856.89969653,7.32564630314026	chr9	88567620	88567769	ENSSSCT00000029346	ENSSSCG00000027591
9	88500000	88600000	CLR,iHH12	1856.89969653,7.32564630314026	chr9	88567844	88567927	ENSSSCT00000023172	ENSSSCG00000021544
9	88500000	88600000	CLR,iHH12	1856.89969653,7.32564630314026	chr9	88596343	88681631	ENSSSCT00000031171	ENSSSCG00000026722	PHF14
9	88500000	88600000	CLR,iHH12	1856.89969653,7.32564630314026	chr9	88596343	88681087	ENSSSCT00000030889	ENSSSCG00000026722	PHF14
9	88500000	88600000	CLR,iHH12	1856.89969653,7.32564630314026	chr9	88596343	88786396	ENSSSCT00000032105	ENSSSCG00000026722	PHF14
9	88500000	88600000	di,CLR	1.91064725753485,1856.89969653	chr9	88555976	88562999	ENSSSCT00000028465	ENSSSCG00000024313	NDUFA4
9	88500000	88600000	di,CLR	1.91064725753485,1856.89969653	chr9	88567620	88567769	ENSSSCT00000029346	ENSSSCG00000027591
9	88500000	88600000	di,CLR	1.91064725753485,1856.89969653	chr9	88567844	88567927	ENSSSCT00000023172	ENSSSCG00000021544
9	88500000	88600000	di,CLR	1.91064725753485,1856.89969653	chr9	88596343	88681631	ENSSSCT00000031171	ENSSSCG00000026722	PHF14
9	88500000	88600000	di,CLR	1.91064725753485,1856.89969653	chr9	88596343	88681087	ENSSSCT00000030889	ENSSSCG00000026722	PHF14
9	88500000	88600000	di,CLR	1.91064725753485,1856.89969653	chr9	88596343	88786396	ENSSSCT00000032105	ENSSSCG00000026722	PHF14
9	88500000	88600000	di,iHH12	1.91064725753485,7.32564630314026	chr9	88555976	88562999	ENSSSCT00000028465	ENSSSCG00000024313	NDUFA4
9	88500000	88600000	di,iHH12	1.91064725753485,7.32564630314026	chr9	88567620	88567769	ENSSSCT00000029346	ENSSSCG00000027591
9	88500000	88600000	di,iHH12	1.91064725753485,7.32564630314026	chr9	88567844	88567927	ENSSSCT00000023172	ENSSSCG00000021544
9	88500000	88600000	di,iHH12	1.91064725753485,7.32564630314026	chr9	88596343	88681631	ENSSSCT00000031171	ENSSSCG00000026722	PHF14
9	88500000	88600000	di,iHH12	1.91064725753485,7.32564630314026	chr9	88596343	88681087	ENSSSCT00000030889	ENSSSCG00000026722	PHF14
9	88500000	88600000	di,iHH12	1.91064725753485,7.32564630314026	chr9	88596343	88786396	ENSSSCT00000032105	ENSSSCG00000026722	PHF14
9	88600000	88700000	CLR,iHH12	1952.29713371,7.32469673819797	chr9	88596343	88681631	ENSSSCT00000031171	ENSSSCG00000026722	PHF14
9	88600000	88700000	CLR,iHH12	1952.29713371,7.32469673819797	chr9	88596343	88681087	ENSSSCT00000030889	ENSSSCG00000026722	PHF14
9	88600000	88700000	CLR,iHH12	1952.29713371,7.32469673819797	chr9	88596343	88786396	ENSSSCT00000032105	ENSSSCG00000026722	PHF14
9	88700000	88800000	CLR,iHH12	1278.2890555,7.32432516930751	chr9	88596343	88786396	ENSSSCT00000032105	ENSSSCG00000026722	PHF14
9	88900000	89000000	CLR,iHH12	1099.52308201,8.04739823014261	chr9	88921414	89309423	ENSSSCT00000024928	ENSSSCG00000015350	LOC102165229
9	88900000	89000000	CLR,iHH12	1099.52308201,8.04739823014261	chr9	88921414	89309423	ENSSSCT00000016724	ENSSSCG00000015350	LOC102165229
9	88900000	89000000	CLR,iHH12	1099.52308201,8.04739823014261	chr9	88921414	89309423	ENSSSCT00000025355	ENSSSCG00000015350	LOC102165229
9	89000000	89100000	CLR,iHH12	2344.13690724,9.62846514448204	chr9	88921414	89309423	ENSSSCT00000024928	ENSSSCG00000015350	LOC102165229
9	89000000	89100000	CLR,iHH12	2344.13690724,9.62846514448204	chr9	88921414	89309423	ENSSSCT00000016724	ENSSSCG00000015350	LOC102165229
9	89000000	89100000	CLR,iHH12	2344.13690724,9.62846514448204	chr9	88921414	89309423	ENSSSCT00000025355	ENSSSCG00000015350	LOC102165229
9	89000000	89100000	di,CLR	2.18434976782127,2344.13690724	chr9	88921414	89309423	ENSSSCT00000024928	ENSSSCG00000015350	LOC102165229
9	89000000	89100000	di,CLR	2.18434976782127,2344.13690724	chr9	88921414	89309423	ENSSSCT00000016724	ENSSSCG00000015350	LOC102165229
9	89000000	89100000	di,CLR	2.18434976782127,2344.13690724	chr9	88921414	89309423	ENSSSCT00000025355	ENSSSCG00000015350	LOC102165229
9	89000000	89100000	di,iHH12	2.18434976782127,9.62846514448204	chr9	88921414	89309423	ENSSSCT00000024928	ENSSSCG00000015350	LOC102165229
9	89000000	89100000	di,iHH12	2.18434976782127,9.62846514448204	chr9	88921414	89309423	ENSSSCT00000016724	ENSSSCG00000015350	LOC102165229
9	89000000	89100000	di,iHH12	2.18434976782127,9.62846514448204	chr9	88921414	89309423	ENSSSCT00000025355	ENSSSCG00000015350	LOC102165229
9	89100000	89200000	CLR,iHH12	2923.60947351,9.62305675285423	chr9	88921414	89309423	ENSSSCT00000024928	ENSSSCG00000015350	LOC102165229
9	89100000	89200000	CLR,iHH12	2923.60947351,9.62305675285423	chr9	88921414	89309423	ENSSSCT00000016724	ENSSSCG00000015350	LOC102165229
9	89100000	89200000	CLR,iHH12	2923.60947351,9.62305675285423	chr9	88921414	89309423	ENSSSCT00000025355	ENSSSCG00000015350	LOC102165229
9	89200000	89300000	CLR,iHH12	2975.80725317,9.61389138688956	chr9	88921414	89309423	ENSSSCT00000024928	ENSSSCG00000015350	LOC102165229
9	89200000	89300000	CLR,iHH12	2975.80725317,9.61389138688956	chr9	88921414	89309423	ENSSSCT00000016724	ENSSSCG00000015350	LOC102165229
9	89200000	89300000	CLR,iHH12	2975.80725317,9.61389138688956	chr9	88921414	89309423	ENSSSCT00000025355	ENSSSCG00000015350	LOC102165229
9	89300000	89400000	CLR,iHH12	3089.94958875,9.60162961350438	chr9	88921414	89309423	ENSSSCT00000024928	ENSSSCG00000015350	LOC102165229
9	89300000	89400000	CLR,iHH12	3089.94958875,9.60162961350438	chr9	88921414	89309423	ENSSSCT00000016724	ENSSSCG00000015350	LOC102165229
9	89300000	89400000	CLR,iHH12	3089.94958875,9.60162961350438	chr9	88921414	89309423	ENSSSCT00000025355	ENSSSCG00000015350	LOC102165229
9	90000000	90100000	CLR,iHH12	1970.98308429,9.41518460135802	chr9	90000733	90021285	ENSSSCT00000016725	ENSSSCG00000015351	TMEM106B
9	90000000	90100000	CLR,iHH12	1970.98308429,9.41518460135802	chr9	90083318	90143924	ENSSSCT00000022442	ENSSSCG00000022543	VWDE
9	90100000	90200000	CLR,iHH12	1456.01095401,9.38157825948753	chr9	90083318	90143924	ENSSSCT00000022442	ENSSSCG00000022543	VWDE
9	90200000	90300000	CLR,iHH12	628.99203416,9.62796971929476	chr9	90266489	90348474	ENSSSCT00000016727	ENSSSCG00000015353	SCIN
9	91500000	91600000	CLR,iHH12	2242.25415986,9.58160617885181	chr9	91500794	91602325	ENSSSCT00000029225	ENSSSCG00000024591	ETV1
9	91600000	91700000	CLR,iHH12	1775.06308062,9.57702349586947	chr9	91500794	91602325	ENSSSCT00000029225	ENSSSCG00000024591	ETV1
9	91700000	91800000	CLR,iHH12	1058.35015471,9.53404536087294	chr9	91786361	91951765	ENSSSCT00000023901	ENSSSCG00000029969
9	91700000	91800000	di,CLR	1.47507380936406,1058.35015471	chr9	91786361	91951765	ENSSSCT00000023901	ENSSSCG00000029969
9	91700000	91800000	di,iHH12	1.47507380936406,9.53404536087294	chr9	91786361	91951765	ENSSSCT00000023901	ENSSSCG00000029969
9	91800000	91900000	CLR,iHH12	526.29036314,9.48392484609311	chr9	91786361	91951765	ENSSSCT00000023901	ENSSSCG00000029969
9	92000000	92100000	CLR,iHH12	1060.43708022,9.33542114620595	chr9	92032106	92175855	ENSSSCT00000024107	ENSSSCG00000029884
9	92100000	92200000	CLR,iHH12	863.57356922,9.32592549678308	chr9	92032106	92175855	ENSSSCT00000024107	ENSSSCG00000029884
9	101000000	101100000	di,iHH12	1.47097706020097,8.92434695417009	chr9	101021733	101026143	ENSSSCT00000023544	ENSSSCG00000020970	IL6
9	101000000	101100000	di,iHH12	1.47097706020097,8.92434695417009	chr9	101043623	101043697	ENSSSCT00000020819	ENSSSCG00000019224
9	101000000	101100000	di,iHH12	1.47097706020097,8.92434695417009	chr9	101081040	101085426	ENSSSCT00000025647	ENSSSCG00000027850	IL-6
9	101000000	101100000	di,iHH12	1.47097706020097,8.92434695417009	chr9	101083532	101085225	ENSSSCT00000035283	ENSSSCG00000027850	IL-6
9	102500000	102600000	di,iHH12	1.52127477254995,8.84083145690076	chr9	102502067	102502174	ENSSSCT00000019813	ENSSSCG00000025458
9	102500000	102600000	di,iHH12	1.52127477254995,8.84083145690076	chr9	102544382	102626450	ENSSSCT00000016765	ENSSSCG00000015390	ABCB1
9	102500000	102600000	di,iHH12	1.52127477254995,8.84083145690076	chr9	102557647	102626355	ENSSSCT00000034567	ENSSSCG00000015390	ABCB1
9	150000000	150100000	di,CLR	2.00208157473543,1770.31510121	chr9	150042013	150042703	ENSSSCT00000017023	ENSSSCG00000015629
9	150000000	150100000	di,CLR	2.00208157473543,1770.31510121	chr9	150065705	150067733	ENSSSCT00000024930	ENSSSCG00000023303	FIGNL1
9	150000000	150100000	di,CLR	2.00208157473543,1770.31510121	chr9	150076904	150234100	ENSSSCT00000025860	ENSSSCG00000022009	DDC
9	150000000	150100000	di,CLR	2.00208157473543,1770.31510121	chr9	150076904	150234100	ENSSSCT00000028029	ENSSSCG00000022009	DDC
9	150200000	150300000	di,CLR	1.33615572599005,1179.62430743	chr9	150076904	150234100	ENSSSCT00000025860	ENSSSCG00000022009	DDC
9	150200000	150300000	di,CLR	1.33615572599005,1179.62430743	chr9	150076904	150234100	ENSSSCT00000028029	ENSSSCG00000022009	DDC
9	150200000	150300000	di,CLR	1.33615572599005,1179.62430743	chr9	150266275	150423905	ENSSSCT00000031836	ENSSSCG00000015631	GRB10
9	150200000	150300000	di,CLR	1.33615572599005,1179.62430743	chr9	150279686	150423905	ENSSSCT00000017025	ENSSSCG00000015631	GRB10
9	150300000	150400000	di,CLR	1.6554560669008,585.43034015	chr9	150266275	150423905	ENSSSCT00000031836	ENSSSCG00000015631	GRB10
9	150300000	150400000	di,CLR	1.6554560669008,585.43034015	chr9	150279686	150423905	ENSSSCT00000017025	ENSSSCG00000015631	GRB10
10	30800000	30900000	CLR,iHH12	1179.88421086,7.01354219696465	chr10	30847385	30915236	ENSSSCT00000029331	ENSSSCG00000027312	PTCH1
10	70500000	70600000	di,CLR	1.39511352083477,724.03062015	chr10	70509345	70658589	ENSSSCT00000012183	ENSSSCG00000011131
12	22200000	22300000	di,CLR	1.44104308717386,2331.0006826	chr12	22235315	22260304	ENSSSCT00000019019	ENSSSCG00000017470	TNS4
12	22200000	22300000	di,CLR	1.44104308717386,2331.0006826	chr12	22275242	22290067	ENSSSCT00000019021	ENSSSCG00000017472	IGFBP4
12	40500000	40600000	di,CLR	1.45817529337099,2496.03843082	chr12	40507754	40548752	ENSSSCT00000019262	ENSSSCG00000017697
12	40500000	40600000	di,CLR	1.45817529337099,2496.03843082	chr12	40530571	40606103	ENSSSCT00000019263	ENSSSCG00000025775	LOC100623912
12	40500000	40600000	di,CLR	1.45817529337099,2496.03843082	chr12	40562529	40616164	ENSSSCT00000029194	ENSSSCG00000029874	DUSP14
12	50100000	50200000	di,CLR	1.35093151901638,622.92987628	chr12	50027383	50195643	ENSSSCT00000019401	ENSSSCG00000017826	SMG6
12	55500000	55600000	di,CLR	1.46640800557805,1555.36384003	chr12	55506215	55528405	ENSSSCT00000019548	ENSSSCG00000021363	CHD3
12	55500000	55600000	di,CLR	1.46640800557805,1555.36384003	chr12	55522996	55523134	ENSSSCT00000031722	ENSSSCG00000029854
12	55500000	55600000	di,CLR	1.46640800557805,1555.36384003	chr12	55530185	55532845	ENSSSCT00000023461	ENSSSCG00000023166	LOC102159363
12	55500000	55600000	di,CLR	1.46640800557805,1555.36384003	chr12	55536757	55545091	ENSSSCT00000026438	ENSSSCG00000029940	KCNAB3
12	55500000	55600000	di,CLR	1.46640800557805,1555.36384003	chr12	55545613	55547253	ENSSSCT00000031070	ENSSSCG00000029679	TRAPPC1
12	55500000	55600000	di,CLR	1.46640800557805,1555.36384003	chr12	55548338	55568067	ENSSSCT00000019553	ENSSSCG00000017968	CNTROB
13	117600000	117700000	di,iHH12	2.50013521077137,4.91844609317371	chr13	117558741	117628838	ENSSSCT00000029926	ENSSSCG00000030467	PHC3
13	117600000	117700000	di,iHH12	2.50013521077137,4.91844609317371	chr13	117558741	117628838	ENSSSCT00000027451	ENSSSCG00000030467	PHC3
13	117600000	117700000	di,iHH12	2.50013521077137,4.91844609317371	chr13	117695854	117740247	ENSSSCT00000012856	ENSSSCG00000011745	PRKCI
13	131500000	131600000	di,CLR	1.59336862561612,525.43757635	chr13	131521545	131532774	ENSSSCT00000024478	ENSSSCG00000025374	DVL3
13	131500000	131600000	di,CLR	1.59336862561612,525.43757635	chr13	131534146	131543179	ENSSSCT00000030395	ENSSSCG00000024437	AP2M1
13	131500000	131600000	di,CLR	1.59336862561612,525.43757635	chr13	131545212	131553863	ENSSSCT00000027528	ENSSSCG00000028856	ABCF3
13	131500000	131600000	di,CLR	1.59336862561612,525.43757635	chr13	131569100	131581455	ENSSSCT00000027265	ENSSSCG00000026185	VWA5B2
13	131500000	131600000	di,CLR	1.59336862561612,525.43757635	chr13	131580820	131580906	ENSSSCT00000031086	ENSSSCG00000029263
13	131500000	131600000	di,CLR	1.59336862561612,525.43757635	chr13	131581812	131587978	ENSSSCT00000025814	ENSSSCG00000021319	ALG3
13	131500000	131600000	di,CLR	1.59336862561612,525.43757635	chr13	131588750	131619287	ENSSSCT00000025407	ENSSSCG00000025067	ECE2
13	131500000	131600000	di,CLR	1.59336862561612,525.43757635	chr13	131596810	131597937	ENSSSCT00000032069	ENSSSCG00000029888	CAMK2N2
13	131900000	132000000	di,CLR	2.12247029384172,561.68741813	chr13	131955234	131975370	ENSSSCT00000023583	ENSSSCG00000026516	EPHB3
13	143100000	143200000	di,CLR	1.59286781790129,860.99939329	chr13	143119130	143144054	ENSSSCT00000026267	ENSSSCG00000023527	NRROS
13	145700000	145800000	di,CLR	1.41857228591908,1494.79559562	chr13	145164316	145723488	ENSSSCT00000023434	ENSSSCG00000021656
13	145700000	145800000	di,CLR	1.41857228591908,1494.79559562	chr13	145336493	145723489	ENSSSCT00000029280	ENSSSCG00000021656
13	146200000	146300000	di,CLR	1.79731714825052,2314.03435533	chr13	146205267	146232577	ENSSSCT00000012981	ENSSSCG00000011867	MYLK
13	146200000	146300000	di,CLR	1.79731714825052,2314.03435533	chr13	146236919	146258865	ENSSSCT00000030879	ENSSSCG00000020935
13	201100000	201200000	di,CLR	1.48237421723357,1419.53830214	chr13	201138425	201138499	ENSSSCT00000029573	ENSSSCG00000027803
13	201100000	201200000	di,CLR	1.48237421723357,1419.53830214	chr13	201175947	201176032	ENSSSCT00000022533	ENSSSCG00000020922
14	80000000	80100000	di,iHH12	1.66582496687024,16.874306221045	chr14	80010892	80098908	ENSSSCT00000011248	ENSSSCG00000010276	UNC5B
14	80100000	80200000	CLR,iHH12	1249.13337158,16.8678244081781	chr14	80113946	80157534	ENSSSCT00000011249	ENSSSCG00000010277	SLC29A3
14	80200000	80300000	CLR,iHH12	1635.82975488,16.5297792887241	chr14	80299986	80624254	ENSSSCT00000011250	ENSSSCG00000010278	CDH23
14	80300000	80400000	CLR,iHH12	1973.87486348,16.3254989698357	chr14	80299986	80624254	ENSSSCT00000011250	ENSSSCG00000010278	CDH23
14	80400000	80500000	CLR,iHH12	1200.63551922,16.3046498265376	chr14	80299986	80624254	ENSSSCT00000011250	ENSSSCG00000010278	CDH23
14	80400000	80500000	CLR,iHH12	1200.63551922,16.3046498265376	chr14	80490197	80490304	ENSSSCT00000021082	ENSSSCG00000023300
14	82400000	82500000	di,iHH12	1.44734094980668,18.194443442659	chr14	82376235	82430844	ENSSSCT00000035011	ENSSSCG00000010301	PPP3CB
14	82400000	82500000	di,iHH12	1.44734094980668,18.194443442659	chr14	82376235	82430844	ENSSSCT00000035106	ENSSSCG00000010301	PPP3CB
14	82400000	82500000	di,iHH12	1.44734094980668,18.194443442659	chr14	82376235	82430844	ENSSSCT00000036513	ENSSSCG00000010301	PPP3CB
14	82400000	82500000	di,iHH12	1.44734094980668,18.194443442659	chr14	82376235	82430748	ENSSSCT00000011274	ENSSSCG00000010301	PPP3CB
14	82400000	82500000	di,iHH12	1.44734094980668,18.194443442659	chr14	82383329	82430844	ENSSSCT00000035374	ENSSSCG00000010301	PPP3CB
14	82400000	82500000	di,iHH12	1.44734094980668,18.194443442659	chr14	82433502	82495889	ENSSSCT00000011275	ENSSSCG00000010302	USP54
14	86700000	86800000	di,CLR	1.41092421412503,523.16349622	chr14	86782860	86812350	ENSSSCT00000027181	ENSSSCG00000026268	DLG5
14	86700000	86800000	di,CLR	1.41092421412503,523.16349622	chr14	86782890	86786357	ENSSSCT00000033086	ENSSSCG00000026268	DLG5
14	86700000	86800000	di,CLR	1.41092421412503,523.16349622	chr14	86787137	86825782	ENSSSCT00000034607	ENSSSCG00000026268	DLG5
14	107100000	107200000	CLR,iHH12	522.08294975,16.6547915776477	chr14	107148971	107149073	ENSSSCT00000025727	ENSSSCG00000024074
14	117200000	117300000	CLR,iHH12	517.82885317,8.44459786760208	chr14	117246695	117251171	ENSSSCT00000011492	ENSSSCG00000010503	ZNF518A
14	117200000	117300000	CLR,iHH12	517.82885317,8.44459786760208	chr14	117265093	117349965	ENSSSCT00000011493	ENSSSCG00000010504	BLNK
14	117300000	117400000	CLR,iHH12	533.69613133,6.76030010776219	chr14	117265093	117349965	ENSSSCT00000011493	ENSSSCG00000010504	BLNK
14	117300000	117400000	CLR,iHH12	533.69613133,6.76030010776219	chr14	117385454	117419194	ENSSSCT00000033164	ENSSSCG00000010505	DNTT
14	117300000	117400000	CLR,iHH12	533.69613133,6.76030010776219	chr14	117385454	117419194	ENSSSCT00000011494	ENSSSCG00000010505	DNTT
14	117400000	117500000	di,CLR	1.3743938248664,916.13701605	chr14	117385454	117419194	ENSSSCT00000033164	ENSSSCG00000010505	DNTT
14	117400000	117500000	di,CLR	1.3743938248664,916.13701605	chr14	117385454	117419194	ENSSSCT00000011494	ENSSSCG00000010505	DNTT
14	117400000	117500000	di,CLR	1.3743938248664,916.13701605	chr14	117428246	117444403	ENSSSCT00000011495	ENSSSCG00000010506	OPALIN
14	117400000	117500000	di,CLR	1.3743938248664,916.13701605	chr14	117454644	117514823	ENSSSCT00000011497	ENSSSCG00000010507	TLL2
14	123900000	124000000	di,CLR	1.33628248193529,12910.27496606	chr14	123857642	124025451	ENSSSCT00000011587	ENSSSCG00000010593
15	65600000	65700000	CLR,iHH12	3552.50783137,7.21098014354431	chr15	65656863	65699343	ENSSSCT00000030886	ENSSSCG00000022197
15	65700000	65800000	CLR,iHH12	3669.77475164,7.0961326177687	chr15	65753950	65754057	ENSSSCT00000023895	ENSSSCG00000022275
15	65700000	65800000	CLR,iHH12	3669.77475164,7.0961326177687	chr15	65785413	65801011	ENSSSCT00000031396	ENSSSCG00000029138	UGGT1
15	65800000	65900000	CLR,iHH12	4020.94611377,8.00726503675182	chr15	65785413	65801011	ENSSSCT00000031396	ENSSSCG00000029138	UGGT1
15	65800000	65900000	CLR,iHH12	4020.94611377,8.00726503675182	chr15	65857806	65863478	ENSSSCT00000031918	ENSSSCG00000027345	LOC102161299
15	65800000	65900000	CLR,iHH12	4020.94611377,8.00726503675182	chr15	65889036	65977097	ENSSSCT00000017266	ENSSSCG00000015857	LOC100737246
15	65900000	66000000	CLR,iHH12	3798.25487565,7.29158020990261	chr15	65889036	65977097	ENSSSCT00000017266	ENSSSCG00000015857	LOC100737246
15	65900000	66000000	CLR,iHH12	3798.25487565,7.29158020990261	chr15	65907883	65907990	ENSSSCT00000028586	ENSSSCG00000026835
15	66000000	66100000	CLR,iHH12	4919.11204416,6.73307649372116	chr15	66025272	66122052	ENSSSCT00000017270	ENSSSCG00000015859	SAP130
15	66100000	66200000	CLR,iHH12	5206.69498405,6.05507336311778	chr15	66025272	66122052	ENSSSCT00000017270	ENSSSCG00000015859	SAP130
15	66200000	66300000	CLR,iHH12	4605.74343481,5.40835598904587	chr15	66230018	66238688	ENSSSCT00000023863	ENSSSCG00000028633	AMMECR1L
15	66200000	66300000	CLR,iHH12	4605.74343481,5.40835598904587	chr15	66248225	66249683	ENSSSCT00000024744	ENSSSCG00000026088	POLR2D
15	66200000	66300000	CLR,iHH12	4605.74343481,5.40835598904587	chr15	66266813	66381363	ENSSSCT00000026043	ENSSSCG00000015861	LOC102161942
15	66400000	66500000	CLR,iHH12	3918.17385659,4.76578436046473	chr15	66421181	66434916	ENSSSCT00000017275	ENSSSCG00000015864	MYO7B
15	66400000	66500000	CLR,iHH12	3918.17385659,4.76578436046473	chr15	66435455	66453016	ENSSSCT00000017273	ENSSSCG00000015862	LIMS2
15	66400000	66500000	CLR,iHH12	3918.17385659,4.76578436046473	chr15	66447505	66448525	ENSSSCT00000017274	ENSSSCG00000015863	GPR17
15	66600000	66700000	CLR,iHH12	3089.44174384,8.26876703179289	chr15	66630150	66630250	ENSSSCT00000023421	ENSSSCG00000021796
15	66600000	66700000	CLR,iHH12	3089.44174384,8.26876703179289	chr15	66699446	67026722	ENSSSCT00000017277	ENSSSCG00000015866	FMNL2
15	66600000	66700000	CLR,iHH12	3089.44174384,8.26876703179289	chr15	66699446	67024760	ENSSSCT00000028547	ENSSSCG00000015866	FMNL2
15	66600000	66700000	CLR,iHH12	3089.44174384,8.26876703179289	chr15	66699446	67024760	ENSSSCT00000023011	ENSSSCG00000015866	FMNL2
15	66700000	66800000	CLR,iHH12	2847.5601527,7.24529244779304	chr15	66699446	67026722	ENSSSCT00000017277	ENSSSCG00000015866	FMNL2
15	66700000	66800000	CLR,iHH12	2847.5601527,7.24529244779304	chr15	66699446	67024760	ENSSSCT00000028547	ENSSSCG00000015866	FMNL2
15	66700000	66800000	CLR,iHH12	2847.5601527,7.24529244779304	chr15	66699446	67024760	ENSSSCT00000023011	ENSSSCG00000015866	FMNL2
15	66800000	66900000	CLR,iHH12	4311.06555237,8.90487245665454	chr15	66699446	67026722	ENSSSCT00000017277	ENSSSCG00000015866	FMNL2
15	66800000	66900000	CLR,iHH12	4311.06555237,8.90487245665454	chr15	66699446	67024760	ENSSSCT00000028547	ENSSSCG00000015866	FMNL2
15	66800000	66900000	CLR,iHH12	4311.06555237,8.90487245665454	chr15	66699446	67024760	ENSSSCT00000023011	ENSSSCG00000015866	FMNL2
15	66900000	67000000	CLR,iHH12	5329.18065977,10.2783700979707	chr15	66699446	67026722	ENSSSCT00000017277	ENSSSCG00000015866	FMNL2
15	66900000	67000000	CLR,iHH12	5329.18065977,10.2783700979707	chr15	66699446	67024760	ENSSSCT00000028547	ENSSSCG00000015866	FMNL2
15	66900000	67000000	CLR,iHH12	5329.18065977,10.2783700979707	chr15	66699446	67024760	ENSSSCT00000023011	ENSSSCG00000015866	FMNL2
15	66900000	67000000	di,CLR	1.86878795348508,5329.18065977	chr15	66699446	67026722	ENSSSCT00000017277	ENSSSCG00000015866	FMNL2
15	66900000	67000000	di,CLR	1.86878795348508,5329.18065977	chr15	66699446	67024760	ENSSSCT00000028547	ENSSSCG00000015866	FMNL2
15	66900000	67000000	di,CLR	1.86878795348508,5329.18065977	chr15	66699446	67024760	ENSSSCT00000023011	ENSSSCG00000015866	FMNL2
15	66900000	67000000	di,iHH12	1.86878795348508,10.2783700979707	chr15	66699446	67026722	ENSSSCT00000017277	ENSSSCG00000015866	FMNL2
15	66900000	67000000	di,iHH12	1.86878795348508,10.2783700979707	chr15	66699446	67024760	ENSSSCT00000028547	ENSSSCG00000015866	FMNL2
15	66900000	67000000	di,iHH12	1.86878795348508,10.2783700979707	chr15	66699446	67024760	ENSSSCT00000023011	ENSSSCG00000015866	FMNL2
15	67000000	67100000	CLR,iHH12	5518.54568147,8.54714768418068	chr15	66699446	67026722	ENSSSCT00000017277	ENSSSCG00000015866	FMNL2
15	67000000	67100000	CLR,iHH12	5518.54568147,8.54714768418068	chr15	66699446	67024760	ENSSSCT00000028547	ENSSSCG00000015866	FMNL2
15	67000000	67100000	CLR,iHH12	5518.54568147,8.54714768418068	chr15	66699446	67024760	ENSSSCT00000023011	ENSSSCG00000015866	FMNL2
15	67000000	67100000	CLR,iHH12	5518.54568147,8.54714768418068	chr15	67032519	67085300	ENSSSCT00000017278	ENSSSCG00000015867	PRPF40A
15	67000000	67100000	CLR,iHH12	5518.54568147,8.54714768418068	chr15	67086568	67118931	ENSSSCT00000017279	ENSSSCG00000015868	ARL6IP6
15	67000000	67100000	di,CLR	1.82223279454062,5518.54568147	chr15	66699446	67026722	ENSSSCT00000017277	ENSSSCG00000015866	FMNL2
15	67000000	67100000	di,CLR	1.82223279454062,5518.54568147	chr15	66699446	67024760	ENSSSCT00000028547	ENSSSCG00000015866	FMNL2
15	67000000	67100000	di,CLR	1.82223279454062,5518.54568147	chr15	66699446	67024760	ENSSSCT00000023011	ENSSSCG00000015866	FMNL2
15	67000000	67100000	di,CLR	1.82223279454062,5518.54568147	chr15	67032519	67085300	ENSSSCT00000017278	ENSSSCG00000015867	PRPF40A
15	67000000	67100000	di,CLR	1.82223279454062,5518.54568147	chr15	67086568	67118931	ENSSSCT00000017279	ENSSSCG00000015868	ARL6IP6
15	67000000	67100000	di,iHH12	1.82223279454062,8.54714768418068	chr15	66699446	67026722	ENSSSCT00000017277	ENSSSCG00000015866	FMNL2
15	67000000	67100000	di,iHH12	1.82223279454062,8.54714768418068	chr15	66699446	67024760	ENSSSCT00000028547	ENSSSCG00000015866	FMNL2
15	67000000	67100000	di,iHH12	1.82223279454062,8.54714768418068	chr15	66699446	67024760	ENSSSCT00000023011	ENSSSCG00000015866	FMNL2
15	67000000	67100000	di,iHH12	1.82223279454062,8.54714768418068	chr15	67032519	67085300	ENSSSCT00000017278	ENSSSCG00000015867	PRPF40A
15	67000000	67100000	di,iHH12	1.82223279454062,8.54714768418068	chr15	67086568	67118931	ENSSSCT00000017279	ENSSSCG00000015868	ARL6IP6
15	67100000	67200000	CLR,iHH12	5717.01531779,8.55537418883366	chr15	67086568	67118931	ENSSSCT00000017279	ENSSSCG00000015868	ARL6IP6
15	68000000	68100000	CLR,iHH12	4813.28295895,13.9293337661239	chr15	68095699	68095825	ENSSSCT00000020055	ENSSSCG00000018460
15	68100000	68200000	CLR,iHH12	5099.63198433,14.5223370725819	chr15	68111604	68111934	ENSSSCT00000030317	ENSSSCG00000028520	LOC100155545
15	68800000	68900000	CLR,iHH12	1845.09911638,10.3797586748865	chr15	68860665	68886644	ENSSSCT00000024665	ENSSSCG00000022671
15	69100000	69200000	CLR,iHH12	957.87292668,5.90202701460684	chr15	69062773	69107537	ENSSSCT00000027912	ENSSSCG00000023896	LOC100520278
15	70800000	70900000	di,iHH12	1.49976894107433,7.96897655153942	chr15	70811285	70946574	ENSSSCT00000017283	ENSSSCG00000015872	MGPD
15	70800000	70900000	di,iHH12	1.49976894107433,7.96897655153942	chr15	70898081	70898188	ENSSSCT00000028930	ENSSSCG00000027177
15	76800000	76900000	di,iHH12	1.91428465253265,4.73065930447847	chr15	76703530	76838573	ENSSSCT00000017311	ENSSSCG00000015898	KCNH7
15	76800000	76900000	di,iHH12	1.91428465253265,4.73065930447847	chr15	76811092	76811202	ENSSSCT00000021053	ENSSSCG00000019458
15	82500000	82600000	di,CLR	1.79231215705216,933.42405346	chr15	82491703	82590267	ENSSSCT00000036073	ENSSSCG00000015917	XIRP2
15	82500000	82600000	di,CLR	1.79231215705216,933.42405346	chr15	82491703	82597615	ENSSSCT00000033678	ENSSSCG00000015917	XIRP2
15	82500000	82600000	di,CLR	1.79231215705216,933.42405346	chr15	82522476	82597611	ENSSSCT00000033281	ENSSSCG00000015917	XIRP2
15	82500000	82600000	di,CLR	1.79231215705216,933.42405346	chr15	82522476	82597615	ENSSSCT00000033112	ENSSSCG00000015917	XIRP2
15	82500000	82600000	di,CLR	1.79231215705216,933.42405346	chr15	82588671	82597617	ENSSSCT00000017333	ENSSSCG00000015917	XIRP2
15	83500000	83600000	di,CLR	1.51424805703642,776.06833329	chr15	83412045	83526943	ENSSSCT00000030087	ENSSSCG00000023421	STK39
15	88600000	88700000	di,CLR	2.06374260080428,1157.45582616	chr15	88505943	88690361	ENSSSCT00000017378	ENSSSCG00000015960	LOC100152572
15	88700000	88800000	di,CLR	1.49807644957357,1053.68828442	chr15	88746847	88761828	ENSSSCT00000017379	ENSSSCG00000015961	CDCA7
15	112900000	113000000	CLR,iHH12	1048.79450273,5.57811652587477	chr15	112940717	113017866	ENSSSCT00000017511	ENSSSCG00000016083	PLCL1
15	114700000	114800000	di,CLR	2.56536388051813,4814.96886871	chr15	114729852	114767033	ENSSSCT00000017513	ENSSSCG00000016085
15	120700000	120800000	di,CLR	1.68624945620523,773.25303977	chr15	120723006	120727611	ENSSSCT00000031612	ENSSSCG00000023713	LOC102161128
15	120900000	121000000	di,CLR	1.73860139069817,1330.1778978	chr15	120861245	120921092	ENSSSCT00000017556	ENSSSCG00000016125	INO80D
15	120900000	121000000	di,CLR	1.73860139069817,1330.1778978	chr15	120961660	120998378	ENSSSCT00000017559	ENSSSCG00000016127	NDUFS1
15	145400000	145500000	di,CLR	1.33534407190722,2088.99743659	chr15	145415056	145415839	ENSSSCT00000029904	ENSSSCG00000023439
15	145400000	145500000	di,CLR	1.33534407190722,2088.99743659	chr15	145420218	145429044	ENSSSCT00000017717	ENSSSCG00000016269	SPATA3
15	145400000	145500000	di,CLR	1.33534407190722,2088.99743659	chr15	145450296	145460228	ENSSSCT00000017718	ENSSSCG00000016270	LOC100736598
15	145700000	145800000	di,CLR	1.34206789125073,2413.19432677	chr15	145685645	145740996	ENSSSCT00000024888	ENSSSCG00000023994	ARMC9
15	145700000	145800000	di,CLR	1.34206789125073,2413.19432677	chr15	145786759	145805665	ENSSSCT00000028403	ENSSSCG00000025279
15	146000000	146100000	di,CLR	1.70492336907059,1087.72844894	chr15	145991812	146000291	ENSSSCT00000017725	ENSSSCG00000016277	NMUR1
15	146000000	146100000	di,CLR	1.70492336907059,1087.72844894	chr15	146041090	146042122	ENSSSCT00000017726	ENSSSCG00000016278	C15H2orf57
15	146100000	146200000	di,CLR	1.48889202810261,3384.94887212	chr15	146142849	146147912	ENSSSCT00000017727	ENSSSCG00000016279
15	146100000	146200000	di,CLR	1.48889202810261,3384.94887212	chr15	146199013	146263180	ENSSSCT00000023412	ENSSSCG00000022392
15	146200000	146300000	di,CLR	1.68743610261284,3843.92431635	chr15	146199013	146263180	ENSSSCT00000023412	ENSSSCG00000022392
15	146300000	146400000	di,CLR	2.60311545825916,4719.78902183	chr15	146347595	146350879	ENSSSCT00000028969	ENSSSCG00000026852	NPPC
15	146300000	146400000	di,CLR	2.60311545825916,4719.78902183	chr15	146381890	146596424	ENSSSCT00000026575	ENSSSCG00000022177	DIS3L2
15	146400000	146500000	di,CLR	1.40277548855204,5454.95526931	chr15	146381890	146596424	ENSSSCT00000026575	ENSSSCG00000022177	DIS3L2
15	147000000	147100000	di,CLR	1.54141943824551,4392.97703969	chr15	146959763	147036546	ENSSSCT00000017738	ENSSSCG00000016289	EIF4E2
15	147000000	147100000	di,CLR	1.54141943824551,4392.97703969	chr15	147077259	147124589	ENSSSCT00000017739	ENSSSCG00000016290	EFHD1
15	147100000	147200000	di,CLR	2.4336174206474,3586.7134151	chr15	147077259	147124589	ENSSSCT00000017739	ENSSSCG00000016290	EFHD1
15	147100000	147200000	di,CLR	2.4336174206474,3586.7134151	chr15	147145311	147196329	ENSSSCT00000017740	ENSSSCG00000016291	GIGYF2
15	147100000	147200000	di,CLR	2.4336174206474,3586.7134151	chr15	147163960	147174557	ENSSSCT00000025634	ENSSSCG00000025038	KCNJ13
15	147200000	147300000	di,CLR	3.17603669839545,3440.04600246	chr15	147281210	147314281	ENSSSCT00000026011	ENSSSCG00000022612	LOC100738429
16	50100000	50200000	di,CLR	1.81683472432431,511.22496983	chr16	50135842	50164238	ENSSSCT00000030461	ENSSSCG00000021964	LOC100514498
16	52700000	52800000	di,iHH12	1.4725501642954,5.33465633175894	chr16	52692101	52734538	ENSSSCT00000018486	ENSSSCG00000016976	ZNF366
16	57100000	57200000	CLR,iHH12	893.83538929,5.41949789508063	chr16	57033533	57353882	ENSSSCT00000018512	ENSSSCG00000017000	RANBP17
16	57300000	57400000	CLR,iHH12	1605.21051419,5.05891092960537	chr16	57033533	57353882	ENSSSCT00000018512	ENSSSCG00000017000	RANBP17
16	58200000	58300000	di,CLR	1.87960479164084,1289.14116675	chr16	58215143	58276383	ENSSSCT00000018520	ENSSSCG00000017008	LOC100739364
16	58500000	58600000	di,CLR	2.10023891821665,838.90700118	chr16	58487168	58504882	ENSSSCT00000018522	ENSSSCG00000017010	FAM196B
17	36100000	36200000	di,CLR	1.44625010331063,1367.94219993	chr17	36143506	36169748	ENSSSCT00000007814	ENSSSCG00000007142	PANK2
17	36100000	36200000	di,CLR	1.44625010331063,1367.94219993	chr17	36149786	36149866	ENSSSCT00000024011	ENSSSCG00000022382	MIR103-2
17	36100000	36200000	di,CLR	1.44625010331063,1367.94219993	chr17	36195471	36210175	ENSSSCT00000007815	ENSSSCG00000007143	MAVS
17	36100000	36200000	di,CLR	1.44625010331063,1367.94219993	chr17	36198089	36210175	ENSSSCT00000034089	ENSSSCG00000007143	MAVS
17	36200000	36300000	di,CLR	1.65641540740075,986.48458052	chr17	36195471	36210175	ENSSSCT00000007815	ENSSSCG00000007143	MAVS
17	36200000	36300000	di,CLR	1.65641540740075,986.48458052	chr17	36198089	36210175	ENSSSCT00000034089	ENSSSCG00000007143	MAVS
17	36200000	36300000	di,CLR	1.65641540740075,986.48458052	chr17	36226135	36236032	ENSSSCT00000031284	ENSSSCG00000023811	AP5S1
17	36200000	36300000	di,CLR	1.65641540740075,986.48458052	chr17	36244257	36254564	ENSSSCT00000007824	ENSSSCG00000007151	CDC25B
17	36200000	36300000	di,CLR	1.65641540740075,986.48458052	chr17	36263348	36263885	ENSSSCT00000007823	ENSSSCG00000007150	CENPB
17	36200000	36300000	di,CLR	1.65641540740075,986.48458052	chr17	36267029	36270635	ENSSSCT00000007822	ENSSSCG00000007149	SPEF1
17	36200000	36300000	di,CLR	1.65641540740075,986.48458052	chr17	36283269	36283745	ENSSSCT00000007821	ENSSSCG00000007148	LOC100525089
17	36200000	36300000	di,CLR	1.65641540740075,986.48458052	chr17	36285533	36305348	ENSSSCT00000007820	ENSSSCG00000007147	HSPA12B
17	57400000	57500000	di,CLR	1.56332617791406,572.52575155	chr17	57361963	57464964	ENSSSCT00000008166	ENSSSCG00000007462	DRK1
17	57400000	57500000	di,CLR	1.56332617791406,572.52575155	chr17	57474334	57521756	ENSSSCT00000008167	ENSSSCG00000007463	PTGIS
17	57900000	58000000	di,iHH12	1.90120248114127,5.46579262646979	chr17	57946111	57947682	ENSSSCT00000026517	ENSSSCG00000024816	CEBPB
17	58000000	58100000	CLR,iHH12	672.78110083,8.49373503844958	chr17	58041490	58043061	ENSSSCT00000030559	ENSSSCG00000028739
17	58500000	58600000	CLR,iHH12	1083.71257442,6.19194833291462	chr17	58476080	58505448	ENSSSCT00000008175	ENSSSCG00000007470	FAM65C
17	58500000	58600000	CLR,iHH12	1083.71257442,6.19194833291462	chr17	58476088	58509813	ENSSSCT00000026410	ENSSSCG00000007470	FAM65C
17	58500000	58600000	CLR,iHH12	1083.71257442,6.19194833291462	chr17	58503993	58516526	ENSSSCT00000033200	ENSSSCG00000030760
17	58500000	58600000	CLR,iHH12	1083.71257442,6.19194833291462	chr17	58583133	58653888	ENSSSCT00000024378	ENSSSCG00000027206	LOC100151957
17	58500000	58600000	CLR,iHH12	1083.71257442,6.19194833291462	chr17	58583188	58588981	ENSSSCT00000036488	ENSSSCG00000027206	LOC100151957
17	58600000	58700000	CLR,iHH12	1971.45960332,4.75097665208936	chr17	58583133	58653888	ENSSSCT00000024378	ENSSSCG00000027206	LOC100151957
17	58600000	58700000	CLR,iHH12	1971.45960332,4.75097665208936	chr17	58679437	58744300	ENSSSCT00000008177	ENSSSCG00000007472	BCAS4
17	58600000	58700000	CLR,iHH12	1971.45960332,4.75097665208936	chr17	58697785	58744300	ENSSSCT00000036568	ENSSSCG00000007472	BCAS4
17	58700000	58800000	CLR,iHH12	1911.39152138,4.78246367510316	chr17	58679437	58744300	ENSSSCT00000008177	ENSSSCG00000007472	BCAS4
17	58700000	58800000	CLR,iHH12	1911.39152138,4.78246367510316	chr17	58697785	58744300	ENSSSCT00000036568	ENSSSCG00000007472	BCAS4
17	58700000	58800000	CLR,iHH12	1911.39152138,4.78246367510316	chr17	58757707	58790577	ENSSSCT00000008178	ENSSSCG00000007473	ADNP
17	58700000	58800000	CLR,iHH12	1911.39152138,4.78246367510316	chr17	58757707	58790779	ENSSSCT00000034395	ENSSSCG00000007473	ADNP
17	58700000	58800000	CLR,iHH12	1911.39152138,4.78246367510316	chr17	58761446	58788036	ENSSSCT00000032857	ENSSSCG00000007473	ADNP
17	58700000	58800000	CLR,iHH12	1911.39152138,4.78246367510316	chr17	58793919	58817118	ENSSSCT00000008179	ENSSSCG00000007474	DPM1
17	58700000	58800000	CLR,iHH12	1911.39152138,4.78246367510316	chr17	58793919	58813953	ENSSSCT00000034352	ENSSSCG00000007474	DPM1
17	58700000	58800000	CLR,iHH12	1911.39152138,4.78246367510316	chr17	58793919	58795670	ENSSSCT00000035245	ENSSSCG00000007474	DPM1
17	58700000	58800000	CLR,iHH12	1911.39152138,4.78246367510316	chr17	58795402	58817099	ENSSSCT00000033789	ENSSSCG00000007474	DPM1
17	58700000	58800000	CLR,iHH12	1911.39152138,4.78246367510316	chr17	58798776	58817074	ENSSSCT00000034996	ENSSSCG00000007474	DPM1
18	1200000	1300000	di,CLR	1.3903262829546,605.72910413	chr18	1265486	1314355	ENSSSCT00000029209	ENSSSCG00000025769
18	1300000	1400000	di,CLR	2.05248205276544,1169.50451142	chr18	1265486	1314355	ENSSSCT00000029209	ENSSSCG00000025769
18	1400000	1500000	di,CLR	2.19256438514433,1252.98287182	chr18	1417690	1556974	ENSSSCT00000025384	ENSSSCG00000026652
18	1400000	1500000	di,CLR	2.19256438514433,1252.98287182	chr18	1454199	1463301	ENSSSCT00000017865	ENSSSCG00000016408	LOC100525669
18	42400000	42500000	CLR,iHH12	551.18307551,5.17840866436107	chr18	42467103	42508140	ENSSSCT00000018141	ENSSSCG00000016662	TBX20
18	42500000	42600000	CLR,iHH12	552.15022648,4.76066083831961	chr18	42467103	42508140	ENSSSCT00000018141	ENSSSCG00000016662	TBX20
18	42500000	42600000	CLR,iHH12	552.15022648,4.76066083831961	chr18	42525272	42595302	ENSSSCT00000018142	ENSSSCG00000016663	LOC100524658
18	49800000	49900000	di,CLR	1.46105531997983,1334.32748626	chr18	49833856	49834138	ENSSSCT00000018180	ENSSSCG00000016699	HOXA10
18	49800000	49900000	di,CLR	1.46105531997983,1334.32748626	chr18	49836540	49836625	ENSSSCT00000021607	ENSSSCG00000027729
18	49800000	49900000	di,CLR	1.46105531997983,1334.32748626	chr18	49840680	49842577	ENSSSCT00000029161	ENSSSCG00000028997
18	51200000	51300000	di,CLR	2.3266068979342,631.28155769	chr18	51216034	51216102	ENSSSCT00000019872	ENSSSCG00000018277	MIR148A

## Sheet: table S7
Table S7 Candidate Regions with 305 LncRNA Genes
Chr	Start	End	Methods	Values	Chr	Start	End	NONCODE ID
1	9200000	9300000	di,CLR	1.50249795620729,527.09941187	chr1	9273799	9275031	NONSUSG000874
1	9200000	9300000	di,CLR	1.50249795620729,527.09941187	chr1	9287808	9293660	NONSUSG000875
1	49200000	49300000	CLR,iHH12	1433.05248893,5.51534431973829	chr1	49299951	49476055	NONSUSG001012
1	113700000	113800000	CLR,iHH12	701.54051869,5.98709001797437	chr1	113752371	113767016	NONSUSG001151
1	113800000	113900000	CLR,iHH12	501.43005945,5.97938340395001	chr1	113823323	113841479	NONSUSG001152
1	113800000	113900000	CLR,iHH12	501.43005945,5.97938340395001	chr1	113870345	113882475	NONSUSG001153
1	114100000	114200000	CLR,iHH12	987.90480419,5.62462456533067	chr1	114165467	114168674	NONSUSG001154
1	147400000	147500000	di,iHH12	2.43194333560756,5.41289597913801	chr1	147457828	147486330	NONSUSG001245
1	151700000	151800000	di,iHH12	1.96743959737416,5.00602016232001	chr1	151781640	151787807	NONSUSG000425
1	151800000	151900000	di,iHH12	3.28051935629614,6.36327210673618	chr1	151838684	152142828	NONSUSG000426
1	153500000	153600000	di,iHH12	3.33131321141405,5.69460337303396	chr1	153516399	153519072	NONSUSG000430
1	153500000	153600000	di,iHH12	3.33131321141405,5.69460337303396	chr1	153516609	153519383	NONSUSG000431
1	153500000	153600000	di,iHH12	3.33131321141405,5.69460337303396	chr1	153517721	153520415	NONSUSG000432
1	153500000	153600000	di,iHH12	3.33131321141405,5.69460337303396	chr1	153518021	153520651	NONSUSG000433
1	153500000	153600000	di,iHH12	3.33131321141405,5.69460337303396	chr1	153518371	153521047	NONSUSG000434
1	223900000	224000000	di,iHH12	1.43840627197289,7.77006829309839	chr1	223959087	223960226	NONSUSG000583
1	223900000	224000000	di,iHH12	1.43840627197289,7.77006829309839	chr1	223980159	223981163	NONSUSG000584
1	223900000	224000000	di,iHH12	1.43840627197289,7.77006829309839	chr1	223940614	223969341	NONSUSG001429
1	236100000	236200000	di,CLR	4.01075847338428,1085.73205523	chr1	235989581	237287146	NONSUSG000617
1	261800000	261900000	CLR,iHH12	5125.174256,14.0880987725415	chr1	261854621	261885291	XLOC_000667
1	261800000	261900000	CLR,iHH12	5125.174256,14.0880987725415	chr1	261897607	261973130	NONSUSG000659
1	261800000	261900000	di,CLR	1.91393137604047,5125.174256	chr1	261854621	261885291	XLOC_000667
1	261800000	261900000	di,CLR	1.91393137604047,5125.174256	chr1	261897607	261973130	NONSUSG000659
1	261800000	261900000	di,iHH12	1.91393137604047,14.0880987725415	chr1	261854621	261885291	XLOC_000667
1	261800000	261900000	di,iHH12	1.91393137604047,14.0880987725415	chr1	261897607	261973130	NONSUSG000659
1	261900000	262000000	CLR,iHH12	4988.57241654,13.7121723923662	chr1	261897607	261973130	NONSUSG000659
1	262100000	262200000	CLR,iHH12	4626.84418729,9.64528895813342	chr1	262110672	262486530	NONSUSG000660
1	262200000	262300000	CLR,iHH12	4231.93393415,9.27122229902092	chr1	262110672	262486530	NONSUSG000660
1	262300000	262400000	CLR,iHH12	4542.98965304,8.04113316579513	chr1	262110672	262486530	NONSUSG000660
1	262400000	262500000	CLR,iHH12	3607.43156162,6.79355965200159	chr1	262110672	262486530	NONSUSG000660
1	263900000	264000000	CLR,iHH12	2515.9953864,5.25726071757548	chr1	263977408	263978084	NONSUSG001516
1	264100000	264200000	di,CLR	1.92706901075438,2603.73023368	chr1	264105059	264118750	NONSUSG000664
1	264100000	264200000	di,CLR	1.92706901075438,2603.73023368	chr1	264117039	264120973	NONSUSG001517
1	264100000	264200000	di,CLR	1.92706901075438,2603.73023368	chr1	264197923	264198766	NONSUSG001518
1	264700000	264800000	CLR,iHH12	1225.24493766,4.89021338285583	chr1	264530257	264721784	NONSUSG000669
1	264700000	264800000	CLR,iHH12	1225.24493766,4.89021338285583	chr1	264741422	264753906	NONSUSG000670
2	31800000	31900000	CLR,iHH12	969.46217818,5.199803365157	chr2	31872568	31877047	NONSUSG008344
2	73700000	73800000	di,CLR	3.27944489293646,920.83677233	chr2	73699616	73709987	NONSUSG009010
2	74000000	74100000	di,CLR	2.7086173625349,1038.86613104	chr2	74095303	74101417	NONSUSG008466
2	74100000	74200000	di,CLR	1.42671201970766,658.15464301	chr2	74095303	74101417	NONSUSG008466
2	74100000	74200000	di,CLR	1.42671201970766,658.15464301	chr2	74110103	74125343	NONSUSG008467
2	74100000	74200000	di,CLR	1.42671201970766,658.15464301	chr2	74164398	74166878	NONSUSG009011
2	74300000	74400000	di,CLR	2.67251389951708,789.38725405	chr2	74316985	74320638	NONSUSG008468
2	76200000	76300000	di,CLR	2.28287085822732,785.53133064	chr2	76247608	76265962	NONSUSG008477
2	77900000	78000000	di,CLR	1.33824719782879,1462.54841507	chr2	77915021	77927702	NONSUSG008489
2	78300000	78400000	di,CLR	2.52153107878122,686.614277829999	chr2	78361277	78361737	NONSUSG008490
2	78300000	78400000	di,CLR	2.52153107878122,686.614277829999	chr2	78371944	78376141	NONSUSG008491
2	78300000	78400000	di,CLR	2.52153107878122,686.614277829999	chr2	78379209	78382478	NONSUSG008492
2	79700000	79800000	di,CLR	1.85876538918347,4454.16386794	chr2	79670156	79770270	NONSUSG009035
2	80300000	80400000	di,CLR	1.79281461508971,2953.69680472	chr2	80348179	80349803	NONSUSG009036
2	80400000	80500000	di,CLR	1.64748552973977,2896.25461648	chr2	80495958	80501695	NONSUSG009037
2	80500000	80600000	di,CLR	2.04887226220414,2446.20905702	chr2	80588724	80663631	NONSUSG008496
2	80500000	80600000	di,CLR	2.04887226220414,2446.20905702	chr2	80495958	80501695	NONSUSG009037
2	82200000	82300000	di,CLR	2.09404814122566,2916.48785551	chr2	82215741	82218870	NONSUSG009045
2	82700000	82800000	di,CLR	1.33109413265821,2905.80587553	chr2	82756448	82855736	NONSUSG009046
2	83500000	83600000	di,CLR	1.70199879023021,3820.10081188	chr2	83432891	83537612	NONSUSG008505
2	84900000	85000000	di,CLR	1.43048336747431,3221.2799986	chr2	84973826	84984533	NONSUSG009055
2	85000000	85100000	di,CLR	1.77236007778685,4380.39681151	chr2	85045042	85048707	NONSUSG009056
2	86800000	86900000	CLR,iHH12	2978.2620432,8.35878328170613	chr2	86847304	86849912	NONSUSG009062
2	87100000	87200000	CLR,iHH12	770.13568422,6.4217960761087	chr2	87115238	87122897	NONSUSG009063
2	87800000	87900000	CLR,iHH12	820.01674061,6.62453709227458	chr2	87703305	87803022	NONSUSG008513
2	87900000	88000000	CLR,iHH12	3116.5330086,8.89098346778355	chr2	87993327	87994250	NONSUSG009066
2	88000000	88100000	CLR,iHH12	5118.34265359,8.88949719222171	chr2	88037641	88134958	NONSUSG009067
2	88100000	88200000	CLR,iHH12	5525.1993892,8.96740280292149	chr2	88178222	88180402	NONSUSG008514
2	88100000	88200000	CLR,iHH12	5525.1993892,8.96740280292149	chr2	88037641	88134958	NONSUSG009067
2	88500000	88600000	CLR,iHH12	6364.94409724,8.85568442318986	chr2	88572574	88573293	NONSUSG008515
2	88800000	88900000	CLR,iHH12	6968.87589982,8.9614989861064	chr2	88846434	88884351	NONSUSG008516
2	89100000	89200000	CLR,iHH12	3343.46242127,8.56751210592201	chr2	89149452	89151789	NONSUSG009068
2	89200000	89300000	CLR,iHH12	703.37778842,8.4775924344307	chr2	89269457	89270156	NONSUSG008517
2	90000000	90100000	CLR,iHH12	1526.00964504,7.59521953316897	chr2	90010170	90085570	NONSUSG009070
3	25900000	26000000	CLR,iHH12	705.52300349,5.30638957246246	chr3	25937071	25953106	NONSUSG009459
3	25900000	26000000	CLR,iHH12	705.52300349,5.30638957246246	chr3	25950493	25972047	NONSUSG010054
3	25900000	26000000	di,CLR	1.91048199496504,705.52300349	chr3	25937071	25953106	NONSUSG009459
3	25900000	26000000	di,CLR	1.91048199496504,705.52300349	chr3	25950493	25972047	NONSUSG010054
3	25900000	26000000	di,iHH12	1.91048199496504,5.30638957246246	chr3	25937071	25953106	NONSUSG009459
3	25900000	26000000	di,iHH12	1.91048199496504,5.30638957246246	chr3	25950493	25972047	NONSUSG010054
3	49600000	49700000	di,CLR	1.3700374562813,1573.4857959	chr3	49635841	49639551	NONSUSG010178
3	50000000	50100000	di,CLR	2.19748698973046,3794.61640635	chr3	50008964	50009609	NONSUSG009587
3	50000000	50100000	di,CLR	2.19748698973046,3794.61640635	chr3	50026315	50033979	NONSUSG010180
3	50000000	50100000	di,CLR	2.19748698973046,3794.61640635	chr3	50075099	50082682	NONSUSG010181
3	50800000	50900000	di,CLR	1.43996327867756,4501.10966863	chr3	50794212	50944009	NONSUSG009590
3	51300000	51400000	di,CLR	1.60094063565991,3281.7657589	chr3	51290309	51306581	NONSUSG010183
3	51700000	51800000	di,CLR	1.88524865277207,597.77125262	chr3	51729364	51730817	NONSUSG009594
3	51700000	51800000	di,CLR	1.88524865277207,597.77125262	chr3	51781680	51784278	NONSUSG009595
3	51800000	51900000	di,CLR	1.81085757530585,1129.41530026	chr3	51851586	51854328	NONSUSG010186
3	52200000	52300000	di,CLR	2.07977045043878,3442.65977516	chr3	52226186	52229999	NONSUSG009598
3	52400000	52500000	di,CLR	1.54822939067246,4505.70180157	chr3	52476777	52477837	NONSUSG009600
3	52400000	52500000	di,CLR	1.54822939067246,4505.70180157	chr3	52447445	52534714	NONSUSG010188
3	54300000	54400000	di,CLR	1.40817151832168,11140.53891659	chr3	54374926	54485334	NONSUSG009603
3	54300000	54400000	di,CLR	1.40817151832168,11140.53891659	chr3	54365360	54366854	NONSUSG010191
3	54400000	54500000	di,CLR	1.86502398908171,10055.97862658	chr3	54374926	54485334	NONSUSG009603
3	54600000	54700000	di,CLR	2.04007320453962,9581.791301	chr3	54698371	54821607	NONSUSG010192
3	54700000	54800000	di,CLR	2.03719701467435,8900.39977805	chr3	54795997	54806734	NONSUSG009604
3	54700000	54800000	di,CLR	2.03719701467435,8900.39977805	chr3	54698371	54821607	NONSUSG010192
3	55200000	55300000	di,CLR	1.41341432187616,5918.36738563	chr3	55198120	55200866	NONSUSG009607
3	84600000	84700000	di,CLR	1.41823208313867,1313.01499404	chr3	84693340	84694509	NONSUSG010272
3	84800000	84900000	di,CLR	1.83225350984592,1031.11128663	chr3	84835526	84838925	NONSUSG010273
3	84800000	84900000	di,CLR	1.83225350984592,1031.11128663	chr3	84842099	84848063	NONSUSG010274
3	85900000	86000000	CLR,iHH12	623.14033377,6.01780637958572	chr3	85977014	86001100	NONSUSG010276
3	86900000	87000000	CLR,iHH12	643.6255737,8.38905169637732	chr3	86897739	86904062	NONSUSG009696
3	86900000	87000000	CLR,iHH12	643.6255737,8.38905169637732	chr3	86884302	87683867	NONSUSG010278
3	86900000	87000000	di,CLR	1.3724336793413,643.6255737	chr3	86897739	86904062	NONSUSG009696
3	86900000	87000000	di,CLR	1.3724336793413,643.6255737	chr3	86884302	87683867	NONSUSG010278
3	86900000	87000000	di,iHH12	1.3724336793413,8.38905169637732	chr3	86897739	86904062	NONSUSG009696
3	86900000	87000000	di,iHH12	1.3724336793413,8.38905169637732	chr3	86884302	87683867	NONSUSG010278
3	87000000	87100000	CLR,iHH12	1224.99586795,8.16535071014751	chr3	86884302	87683867	NONSUSG010278
3	87000000	87100000	CLR,iHH12	1224.99586795,8.16535071014751	chr3	87000192	87039041	NONSUSG010279
3	87100000	87200000	CLR,iHH12	1153.72110376,7.54535911661247	chr3	86884302	87683867	NONSUSG010278
3	87200000	87300000	CLR,iHH12	524.11866272,6.80085891642751	chr3	86884302	87683867	NONSUSG010278
3	88800000	88900000	di,CLR	1.61190949751435,491.28331344	chr3	88637323	89103031	NONSUSG009697
4	39800000	39900000	CLR,iHH12	727.33696133,6.91430922004301	chr4	39819075	39835492	NONSUSG010620
4	39800000	39900000	CLR,iHH12	727.33696133,6.91430922004301	chr4	39797430	39802405	NONSUSG011198
4	39900000	40000000	CLR,iHH12	977.52143735,4.98409140496803	chr4	39957617	39959058	NONSUSG010621
4	39900000	40000000	CLR,iHH12	977.52143735,4.98409140496803	chr4	39904223	39920011	NONSUSG011199
4	39900000	40000000	CLR,iHH12	977.52143735,4.98409140496803	chr4	39988413	39990746	NONSUSG011200
4	90400000	90500000	di,iHH12	1.33775158145452,7.00742998701523	chr4	90408656	90410359	NONSUSG010781
4	90400000	90500000	di,iHH12	1.33775158145452,7.00742998701523	chr4	90468940	90476561	NONSUSG010782
4	90600000	90700000	CLR,iHH12	593.20254866,7.64977823191817	chr4	90626308	90626909	NONSUSG010784
4	91800000	91900000	di,iHH12	2.44057565998279,5.53279544259672	chr4	91878515	91882902	NONSUSG010785
5	53200000	53300000	di,iHH12	2.43084644520939,5.63143666165577	chr5	52886808	53371093	NONSUSG011787
5	53200000	53300000	di,iHH12	2.43084644520939,5.63143666165577	chr5	53298343	53306556	NONSUSG011790
5	53200000	53300000	di,iHH12	2.43084644520939,5.63143666165577	chr5	53243578	53244960	NONSUSG012218
5	55100000	55200000	CLR,iHH12	690.80958884,5.71425091822757	chr5	55196566	55202651	NONSUSG012221
5	55200000	55300000	CLR,iHH12	1595.40602498,7.11861362210027	chr5	55296901	55321192	NONSUSG011792
5	55200000	55300000	CLR,iHH12	1595.40602498,7.11861362210027	chr5	55196566	55202651	NONSUSG012221
5	55200000	55300000	CLR,iHH12	1595.40602498,7.11861362210027	chr5	55297037	55299258	NONSUSG012222
5	55200000	55300000	di,CLR	1.67549085229772,1595.40602498	chr5	55296901	55321192	NONSUSG011792
5	55200000	55300000	di,CLR	1.67549085229772,1595.40602498	chr5	55196566	55202651	NONSUSG012221
5	55200000	55300000	di,CLR	1.67549085229772,1595.40602498	chr5	55297037	55299258	NONSUSG012222
5	55200000	55300000	di,iHH12	1.67549085229772,7.11861362210027	chr5	55296901	55321192	NONSUSG011792
5	55200000	55300000	di,iHH12	1.67549085229772,7.11861362210027	chr5	55196566	55202651	NONSUSG012221
5	55200000	55300000	di,iHH12	1.67549085229772,7.11861362210027	chr5	55297037	55299258	NONSUSG012222
5	55300000	55400000	CLR,iHH12	1816.33083159,5.53633566841415	chr5	55296901	55321192	NONSUSG011792
5	55300000	55400000	di,CLR	2.02104318654056,1816.33083159	chr5	55296901	55321192	NONSUSG011792
5	55300000	55400000	di,iHH12	2.02104318654056,5.53633566841415	chr5	55296901	55321192	NONSUSG011792
5	58000000	58100000	di,iHH12	1.85607988451214,9.33976643795271	chr5	58029689	58032647	NONSUSG011799
5	58100000	58200000	CLR,iHH12	553.34301738,9.11209448122875	chr5	58149894	58289414	NONSUSG012227
5	58100000	58200000	di,CLR	1.56847372624171,553.34301738	chr5	58149894	58289414	NONSUSG012227
5	58100000	58200000	di,iHH12	1.56847372624171,9.11209448122875	chr5	58149894	58289414	NONSUSG012227
5	58200000	58300000	CLR,iHH12	836.43274848,8.11026562213682	chr5	58246507	58247974	NONSUSG011800
5	58200000	58300000	CLR,iHH12	836.43274848,8.11026562213682	chr5	58256236	58257806	NONSUSG011801
5	58200000	58300000	CLR,iHH12	836.43274848,8.11026562213682	chr5	58149894	58289414	NONSUSG012227
5	58200000	58300000	di,CLR	1.43852269750195,836.43274848	chr5	58246507	58247974	NONSUSG011800
5	58200000	58300000	di,CLR	1.43852269750195,836.43274848	chr5	58256236	58257806	NONSUSG011801
5	58200000	58300000	di,CLR	1.43852269750195,836.43274848	chr5	58149894	58289414	NONSUSG012227
5	58200000	58300000	di,iHH12	1.43852269750195,8.11026562213682	chr5	58246507	58247974	NONSUSG011800
5	58200000	58300000	di,iHH12	1.43852269750195,8.11026562213682	chr5	58256236	58257806	NONSUSG011801
5	58200000	58300000	di,iHH12	1.43852269750195,8.11026562213682	chr5	58149894	58289414	NONSUSG012227
5	58300000	58400000	CLR,iHH12	781.77712009,6.79986600178134	chr5	58350105	58360068	NONSUSG011802
5	58300000	58400000	di,CLR	1.95374181146838,781.77712009	chr5	58350105	58360068	NONSUSG011802
5	58300000	58400000	di,iHH12	1.95374181146838,6.79986600178134	chr5	58350105	58360068	NONSUSG011802
6	32800000	32900000	di,CLR	2.12169641133555,2266.44897902	chr6	32877924	32884811	NONSUSG013253
6	33000000	33100000	di,CLR	2.482171437,2254.79062819	chr6	33042225	33047981	NONSUSG012589
6	33000000	33100000	di,CLR	2.482171437,2254.79062819	chr6	33071778	33079336	NONSUSG012590
6	64600000	64700000	CLR,iHH12	1032.09093734,4.90850086830887	chr6	64631637	64634621	NONSUSG013449
6	64800000	64900000	CLR,iHH12	2492.24371273,5.13945925672533	chr6	64868121	64872699	NONSUSG012785
6	64800000	64900000	CLR,iHH12	2492.24371273,5.13945925672533	chr6	64858819	64938474	NONSUSG013450
6	65400000	65500000	CLR,iHH12	802.17660784,5.31103187921507	chr6	65489301	65491865	NONSUSG012786
6	65400000	65500000	CLR,iHH12	802.17660784,5.31103187921507	chr6	65494384	65508185	NONSUSG012787
6	65500000	65600000	CLR,iHH12	1182.47679864,4.72945785036197	chr6	65494384	65508185	NONSUSG012787
6	65500000	65600000	CLR,iHH12	1182.47679864,4.72945785036197	chr6	65504247	65509085	NONSUSG013452
6	75200000	75300000	di,CLR	3.32837030531941,1048.12029873	chr6	75214149	75235975	NONSUSG012820
6	75200000	75300000	di,CLR	3.32837030531941,1048.12029873	chr6	75214302	75215364	NONSUSG013487
6	79000000	79100000	di,iHH12	2.1463984035208,4.75130349509486	chr6	79009794	79011343	NONSUSG013498
6	86700000	86800000	CLR,iHH12	738.22300538,7.77229275218928	chr6	86704591	86716472	NONSUSG012874
6	86700000	86800000	CLR,iHH12	738.22300538,7.77229275218928	chr6	86747097	86750738	NONSUSG012875
6	98900000	99000000	di,iHH12	1.42622914034314,4.97060655065175	chr6	98903171	98940377	NONSUSG013561
6	99600000	99700000	di,iHH12	1.42839283294394,5.10131106855008	chr6	99655154	99659865	NONSUSG012915
6	112200000	112300000	CLR,iHH12	723.46632384,6.82820730421941	chr6	112222580	112244697	NONSUSG013594
6	114000000	114100000	di,CLR	1.86591127160065,1718.09893813	chr6	114055088	114057522	XLOC_013293
6	144500000	144600000	di,CLR	1.56643281012273,866.81169989	chr6	144408075	144951779	NONSUSG013679
7	14100000	14200000	CLR,iHH12	619.1053387,6.36704902572632	chr7	14168693	14202291	XLOC_014206
7	14100000	14200000	CLR,iHH12	619.1053387,6.36704902572632	chr7	14168693	14184535	NONSUSG014329
7	63500000	63600000	di,iHH12	2.26290780274631,4.78678832413379	chr7	63595150	63598101	NONSUSG014013
7	80900000	81000000	di,CLR	1.52245789323378,1672.54692535	chr7	80958787	80970064	NONSUSG014559
9	53600000	53700000	di,CLR	1.54462783020873,2927.20713707	chr9	53643190	53677138	NONSUSG015876
9	53800000	53900000	di,CLR	1.40128045362316,3467.26314588	chr9	53884586	53890255	NONSUSG015877
9	54700000	54800000	di,CLR	1.6014514735765,3594.30400677	chr9	54655675	54799026	NONSUSG016423
9	57900000	58000000	di,CLR	1.57438439522235,827.72065481	chr9	57818527	58037131	NONSUSG015889
9	57900000	58000000	di,CLR	1.57438439522235,827.72065481	chr9	57905841	57907015	NONSUSG016428
9	58000000	58100000	di,CLR	1.7174140000523,689.22076454	chr9	57818527	58037131	NONSUSG015889
9	58000000	58100000	di,CLR	1.7174140000523,689.22076454	chr9	58058601	58061674	NONSUSG016429
9	60900000	61000000	di,CLR	1.89481342190309,551.94304789	chr9	60970848	60971399	NONSUSG015896
9	62800000	62900000	CLR,iHH12	672.86870324,6.37899714450798	chr9	62831981	62835225	NONSUSG016445
9	62800000	62900000	CLR,iHH12	672.86870324,6.37899714450798	chr9	62857760	62858372	NONSUSG016446
9	62800000	62900000	CLR,iHH12	672.86870324,6.37899714450798	chr9	62881027	62881568	NONSUSG016447
9	62800000	62900000	di,CLR	1.9140884061849,672.86870324	chr9	62831981	62835225	NONSUSG016445
9	62800000	62900000	di,CLR	1.9140884061849,672.86870324	chr9	62857760	62858372	NONSUSG016446
9	62800000	62900000	di,CLR	1.9140884061849,672.86870324	chr9	62881027	62881568	NONSUSG016447
9	62800000	62900000	di,iHH12	1.9140884061849,6.37899714450798	chr9	62831981	62835225	NONSUSG016445
9	62800000	62900000	di,iHH12	1.9140884061849,6.37899714450798	chr9	62857760	62858372	NONSUSG016446
9	62800000	62900000	di,iHH12	1.9140884061849,6.37899714450798	chr9	62881027	62881568	NONSUSG016447
9	63600000	63700000	CLR,iHH12	613.45566307,5.20203720193894	chr9	63523861	63705147	NONSUSG015904
9	63600000	63700000	CLR,iHH12	613.45566307,5.20203720193894	chr9	63629311	63634297	NONSUSG015905
9	63600000	63700000	CLR,iHH12	613.45566307,5.20203720193894	chr9	63673649	63678823	NONSUSG016451
9	63700000	63800000	di,iHH12	2.44059314992273,7.21538185871519	chr9	63523861	63705147	NONSUSG015904
9	63700000	63800000	di,iHH12	2.44059314992273,7.21538185871519	chr9	63746494	63774905	NONSUSG015906
9	63700000	63800000	di,iHH12	2.44059314992273,7.21538185871519	chr9	63713702	63715687	NONSUSG016452
9	63700000	63800000	di,iHH12	2.44059314992273,7.21538185871519	chr9	63741179	63759413	NONSUSG016453
9	63900000	64000000	di,iHH12	3.30479421413865,5.33761217211241	chr9	63830079	63911600	NONSUSG015907
9	63900000	64000000	di,iHH12	3.30479421413865,5.33761217211241	chr9	63925124	64019896	NONSUSG015908
9	63900000	64000000	di,iHH12	3.30479421413865,5.33761217211241	chr9	63992219	64178578	NONSUSG015909
9	64500000	64600000	CLR,iHH12	882.20892281,6.08799161445038	chr9	64237429	64682869	NONSUSG015912
9	64500000	64600000	CLR,iHH12	882.20892281,6.08799161445038	chr9	64582760	64587799	NONSUSG016454
9	64600000	64700000	CLR,iHH12	946.50053041,5.33785890171957	chr9	64237429	64682869	NONSUSG015912
9	64600000	64700000	di,CLR	2.91689175826221,946.50053041	chr9	64237429	64682869	NONSUSG015912
9	64600000	64700000	di,iHH12	2.91689175826221,5.33785890171957	chr9	64237429	64682869	NONSUSG015912
9	64800000	64900000	di,CLR	1.64026896400491,869.054617440001	chr9	64841927	64845806	NONSUSG015914
9	66000000	66100000	CLR,iHH12	1020.11037042,5.49979806085226	chr9	66080954	66082664	NONSUSG015915
9	66400000	66500000	di,CLR	1.3877954428595,1378.74871673	chr9	66457947	66460051	NONSUSG016456
9	70200000	70300000	CLR,iHH12	805.9353532,8.37615412733513	chr9	70210668	70214454	NONSUSG015922
9	70200000	70300000	CLR,iHH12	805.9353532,8.37615412733513	chr9	70295702	70331644	NONSUSG015923
9	70200000	70300000	CLR,iHH12	805.9353532,8.37615412733513	chr9	70299252	70327272	NONSUSG015924
9	70800000	70900000	CLR,iHH12	1209.79779243,6.17002576837749	chr9	70867283	70874647	NONSUSG015926
9	75300000	75400000	di,iHH12	1.50107450407126,10.3829926587121	chr9	75398353	75415184	NONSUSG016491
9	75900000	76000000	CLR,iHH12	763.04090088,6.344313046428	chr9	75955597	75957725	NONSUSG016492
9	76900000	77000000	di,iHH12	2.57635018385834,13.6027401934467	chr9	76903219	76916079	NONSUSG015942
9	76900000	77000000	di,iHH12	2.57635018385834,13.6027401934467	chr9	76943251	76988881	NONSUSG015943
9	77000000	77100000	di,iHH12	2.3488070228814,11.6150945878261	chr9	77046380	77075450	NONSUSG015944
9	77000000	77100000	di,iHH12	2.3488070228814,11.6150945878261	chr9	77005976	77008510	NONSUSG016494
9	77600000	77700000	CLR,iHH12	1253.67769039,5.25665438838386	chr9	77602120	77603746	XLOC_016371
9	77600000	77700000	di,CLR	1.35124763858496,1253.67769039	chr9	77602120	77603746	XLOC_016371
9	77600000	77700000	di,iHH12	1.35124763858496,5.25665438838386	chr9	77602120	77603746	XLOC_016371
9	77800000	77900000	di,CLR	1.43567163349418,2227.15657092	chr9	77865462	78109464	NONSUSG015949
9	77900000	78000000	di,CLR	1.60537928588256,2757.33679413	chr9	77865462	78109464	NONSUSG015949
9	77900000	78000000	di,CLR	1.60537928588256,2757.33679413	chr9	77935482	77939031	NONSUSG015950
9	77900000	78000000	di,CLR	1.60537928588256,2757.33679413	chr9	77932781	77934736	NONSUSG016495
9	78000000	78100000	di,CLR	3.7883733719727,3156.49631103	chr9	77865462	78109464	NONSUSG015949
9	78000000	78100000	di,CLR	3.7883733719727,3156.49631103	chr9	78057319	78072209	NONSUSG015951
9	78000000	78100000	di,CLR	3.7883733719727,3156.49631103	chr9	78079344	78445613	NONSUSG016496
9	78100000	78200000	di,CLR	1.78099076011244,3195.63091211	chr9	77865462	78109464	NONSUSG015949
9	78100000	78200000	di,CLR	1.78099076011244,3195.63091211	chr9	78079344	78445613	NONSUSG016496
9	78400000	78500000	di,CLR	1.6334970301102,2734.42309567	chr9	78079344	78445613	NONSUSG016496
9	79000000	79100000	di,CLR	2.2808779008057,6529.1775098	chr9	79073503	79076282	NONSUSG015953
9	83100000	83200000	di,CLR	1.52394183644131,3870.06279583	chr9	83192325	83194931	NONSUSG015961
9	83100000	83200000	di,CLR	1.52394183644131,3870.06279583	chr9	83164260	83188520	NONSUSG016510
9	84200000	84300000	di,CLR	1.50630406307867,2856.67888964	chr9	83987427	84224686	NONSUSG015962
9	84200000	84300000	di,CLR	1.50630406307867,2856.67888964	chr9	84219710	84227923	NONSUSG016512
9	85600000	85700000	CLR,iHH12	1968.38018169,6.4150548089197	chr9	85614606	85704492	NONSUSG015967
9	85600000	85700000	CLR,iHH12	1968.38018169,6.4150548089197	chr9	85614680	85615754	NONSUSG016518
9	85600000	85700000	CLR,iHH12	1968.38018169,6.4150548089197	chr9	85649746	85682965	NONSUSG016519
9	85700000	85800000	CLR,iHH12	2160.42930613,6.4299175645381	chr9	85614606	85704492	NONSUSG015967
9	85700000	85800000	CLR,iHH12	2160.42930613,6.4299175645381	chr9	85755497	85755994	NONSUSG015968
9	85900000	86000000	CLR,iHH12	1565.76285931,7.70815583315266	chr9	85961382	85962633	NONSUSG015969
9	85900000	86000000	CLR,iHH12	1565.76285931,7.70815583315266	chr9	85940215	85961215	NONSUSG016520
9	86000000	86100000	CLR,iHH12	756.41653901,7.74176217502315	chr9	86062974	86174299	NONSUSG016521
9	88600000	88700000	CLR,iHH12	1952.29713371,7.32469673819797	chr9	88682077	88698115	NONSUSG015970
9	89600000	89700000	CLR,iHH12	2361.84991095,9.46600696848649	chr9	89648964	89724400	NONSUSG015971
9	89700000	89800000	CLR,iHH12	2642.15185767,9.46456197835692	chr9	89648964	89724400	NONSUSG015971
9	89800000	89900000	CLR,iHH12	2774.32079091,9.41865257766898	chr9	89899000	90001985	NONSUSG016524
9	89800000	89900000	di,CLR	1.50740522573949,2774.32079091	chr9	89899000	90001985	NONSUSG016524
9	89800000	89900000	di,iHH12	1.50740522573949,9.41865257766898	chr9	89899000	90001985	NONSUSG016524
9	89900000	90000000	CLR,iHH12	2734.19324891,9.42827208338867	chr9	89899000	90001985	NONSUSG016524
9	90000000	90100000	CLR,iHH12	1970.98308429,9.41518460135802	chr9	90045398	90206585	NONSUSG015972
9	90000000	90100000	CLR,iHH12	1970.98308429,9.41518460135802	chr9	89899000	90001985	NONSUSG016524
9	90100000	90200000	CLR,iHH12	1456.01095401,9.38157825948753	chr9	90045398	90206585	NONSUSG015972
9	90200000	90300000	CLR,iHH12	628.99203416,9.62796971929476	chr9	90045398	90206585	NONSUSG015972
9	90200000	90300000	CLR,iHH12	628.99203416,9.62796971929476	chr9	90207093	90235524	NONSUSG015973
9	90200000	90300000	CLR,iHH12	628.99203416,9.62796971929476	chr9	90243081	90247607	NONSUSG016525
9	91500000	91600000	CLR,iHH12	2242.25415986,9.58160617885181	chr9	91584630	91590103	NONSUSG016526
9	97200000	97300000	di,iHH12	1.59457600729808,5.22566279055735	chr9	97197130	97226180	NONSUSG015990
9	97200000	97300000	di,iHH12	1.59457600729808,5.22566279055735	chr9	97207973	97319005	NONSUSG016533
9	97200000	97300000	di,iHH12	1.59457600729808,5.22566279055735	chr9	97276537	97277766	NONSUSG016534
9	101000000	101100000	di,iHH12	1.47097706020097,8.92434695417009	chr9	101041140	101088791	NONSUSG015999
9	102500000	102600000	di,iHH12	1.52127477254995,8.84083145690076	chr9	102505096	102507536	NONSUSG016008
9	102500000	102600000	di,iHH12	1.52127477254995,8.84083145690076	chr9	102466110	102620365	NONSUSG016551
9	149800000	149900000	di,CLR	2.3403710869139,1738.97492065	chr9	149806362	149815829	NONSUSG016173
9	149800000	149900000	di,CLR	2.3403710869139,1738.97492065	chr9	149864909	149876461	NONSUSG016174
9	149900000	150000000	di,CLR	2.49803325200918,1458.90733396	chr9	149908577	149912399	NONSUSG016175
9	149900000	150000000	di,CLR	2.49803325200918,1458.90733396	chr9	149973592	149975799	NONSUSG016718
9	149900000	150000000	di,CLR	2.49803325200918,1458.90733396	chr9	149977920	149980686	NONSUSG016719
9	150000000	150100000	di,CLR	2.00208157473543,1770.31510121	chr9	150050639	150051655	NONSUSG016720
9	150200000	150300000	di,CLR	1.33615572599005,1179.62430743	chr9	150207883	150209118	NONSUSG016176
9	150300000	150400000	di,CLR	1.6554560669008,585.43034015	chr9	150390842	150392996	NONSUSG016177
10	1900000	2000000	di,CLR	1.45214594802037,545.62190927	chr10	719867	2053183	NONSUSG001982
10	1900000	2000000	di,CLR	1.45214594802037,545.62190927	chr10	1934507	1986506	NONSUSG001984
10	30700000	30800000	CLR,iHH12	541.61205326,7.71224309094772	chr10	30697936	30702673	NONSUSG002094
10	30800000	30900000	CLR,iHH12	1179.88421086,7.01354219696465	chr10	30840933	30845178	NONSUSG002095
10	31000000	31100000	CLR,iHH12	672.14365753,4.92806707337312	chr10	31007873	31155756	NONSUSG001793
10	70500000	70600000	di,CLR	1.39511352083477,724.03062015	chr10	70536933	70538771	NONSUSG001943
10	70500000	70600000	di,CLR	1.39511352083477,724.03062015	chr10	70524079	70525454	NONSUSG002269
10	70500000	70600000	di,CLR	1.39511352083477,724.03062015	chr10	70583431	70586858	NONSUSG002270
12	40500000	40600000	di,CLR	1.45817529337099,2496.03843082	chr12	40496853	40500011	NONSUSG003090
12	40500000	40600000	di,CLR	1.45817529337099,2496.03843082	chr12	40545963	40560051	NONSUSG003091
12	50100000	50200000	di,CLR	1.35093151901638,622.92987628	chr12	50189199	50191647	NONSUSG003129
12	55500000	55600000	di,CLR	1.46640800557805,1555.36384003	chr12	55532699	55533325	NONSUSG003170
12	55500000	55600000	di,CLR	1.46640800557805,1555.36384003	chr12	55486603	55500265	NONSUSG003494
13	117600000	117700000	di,iHH12	2.50013521077137,4.91844609317371	chr13	117682919	117684855	NONSUSG003902
13	131900000	132000000	di,CLR	2.12247029384172,561.68741813	chr13	131935772	131951845	NONSUSG003934
13	131900000	132000000	di,CLR	2.12247029384172,561.68741813	chr13	131955295	131963765	NONSUSG003935
13	143100000	143200000	di,CLR	1.59286781790129,860.99939329	chr13	143143974	143148782	NONSUSG003970
13	145700000	145800000	di,CLR	1.41857228591908,1494.79559562	chr13	145716097	145717665	NONSUSG003981
13	145700000	145800000	di,CLR	1.41857228591908,1494.79559562	chr13	145780833	145783657	NONSUSG004554
13	146200000	146300000	di,CLR	1.79731714825052,2314.03435533	chr13	146211187	146212665	XLOC_004089
13	146200000	146300000	di,CLR	1.79731714825052,2314.03435533	chr13	146246267	146248869	NONSUSG003983
13	146200000	146300000	di,CLR	1.79731714825052,2314.03435533	chr13	146258940	146282783	NONSUSG003984
13	146200000	146300000	di,CLR	1.79731714825052,2314.03435533	chr13	146256649	146258851	NONSUSG004558
13	200900000	201000000	CLR,iHH12	672.08754224,5.73256617056913	chr13	200997621	200998067	NONSUSG004676
14	80000000	80100000	di,iHH12	1.66582496687024,16.874306221045	chr14	80027133	80028984	NONSUSG005529
14	80100000	80200000	CLR,iHH12	1249.13337158,16.8678244081781	chr14	80185764	80234633	XLOC_005157
14	80100000	80200000	CLR,iHH12	1249.13337158,16.8678244081781	chr14	80158428	80162786	NONSUSG005530
14	80200000	80300000	CLR,iHH12	1635.82975488,16.5297792887241	chr14	80185764	80234633	XLOC_005157
14	82400000	82500000	di,iHH12	1.44734094980668,18.194443442659	chr14	82499860	82516696	NONSUSG005028
14	82400000	82500000	di,iHH12	1.44734094980668,18.194443442659	chr14	82466556	82473995	NONSUSG005536
14	117200000	117300000	CLR,iHH12	517.82885317,8.44459786760208	chr14	117199424	117203245	NONSUSG005114
14	117200000	117300000	CLR,iHH12	517.82885317,8.44459786760208	chr14	117224955	117246566	NONSUSG005115
14	123900000	124000000	di,CLR	1.33628248193529,12910.27496606	chr14	123903546	123908116	NONSUSG005142
14	152600000	152700000	di,CLR	1.89862110644423,955.99549522	chr14	152557413	152666609	NONSUSG005239
15	26300000	26400000	di,CLR	2.41696587728894,798.67120209	chr15	26333142	26336718	NONSUSG005824
15	64800000	64900000	CLR,iHH12	1219.89568881,5.08208837925835	chr15	64856384	64858891	NONSUSG005916
15	65500000	65600000	CLR,iHH12	2188.24588695,7.06056053324204	chr15	65588524	65652615	NONSUSG005917
15	65600000	65700000	CLR,iHH12	3552.50783137,7.21098014354431	chr15	65588524	65652615	NONSUSG005917
15	66100000	66200000	CLR,iHH12	5206.69498405,6.05507336311778	chr15	66127673	66220619	NONSUSG006347
15	66200000	66300000	CLR,iHH12	4605.74343481,5.40835598904587	chr15	66208155	66211592	NONSUSG005918
15	66200000	66300000	CLR,iHH12	4605.74343481,5.40835598904587	chr15	66127673	66220619	NONSUSG006347
15	66400000	66500000	CLR,iHH12	3918.17385659,4.76578436046473	chr15	66414386	66417822	NONSUSG005919
15	66500000	66600000	CLR,iHH12	1923.80835985,6.00961307613222	chr15	66569970	66621336	NONSUSG006349
15	66500000	66600000	CLR,iHH12	1923.80835985,6.00961307613222	chr15	66572773	66594792	NONSUSG006350
15	66600000	66700000	CLR,iHH12	3089.44174384,8.26876703179289	chr15	66619817	66621437	NONSUSG005920
15	66600000	66700000	CLR,iHH12	3089.44174384,8.26876703179289	chr15	66648256	66660424	NONSUSG005921
15	66600000	66700000	CLR,iHH12	3089.44174384,8.26876703179289	chr15	66569970	66621336	NONSUSG006349
15	66600000	66700000	CLR,iHH12	3089.44174384,8.26876703179289	chr15	66664734	66752219	NONSUSG006351
15	66600000	66700000	CLR,iHH12	3089.44174384,8.26876703179289	chr15	66679085	66684453	NONSUSG006352
15	66700000	66800000	CLR,iHH12	2847.5601527,7.24529244779304	chr15	66763255	66763957	NONSUSG005922
15	66700000	66800000	CLR,iHH12	2847.5601527,7.24529244779304	chr15	66664734	66752219	NONSUSG006351
15	66700000	66800000	CLR,iHH12	2847.5601527,7.24529244779304	chr15	66775501	66779226	NONSUSG006353
15	67100000	67200000	CLR,iHH12	5717.01531779,8.55537418883366	chr15	67130437	67218880	NONSUSG005923
15	67200000	67300000	CLR,iHH12	5942.1687953,7.67050351891938	chr15	67130437	67218880	NONSUSG005923
15	67200000	67300000	CLR,iHH12	5942.1687953,7.67050351891938	chr15	67223164	67223766	NONSUSG005924
15	67200000	67300000	CLR,iHH12	5942.1687953,7.67050351891938	chr15	67224198	67251005	NONSUSG005925
15	68100000	68200000	CLR,iHH12	5099.63198433,14.5223370725819	chr15	68138231	68158069	NONSUSG005926
15	68100000	68200000	CLR,iHH12	5099.63198433,14.5223370725819	chr15	68128756	68141580	NONSUSG006355
15	70200000	70300000	CLR,iHH12	561.99106537,4.82484317133173	chr15	70268520	70426623	NONSUSG005927
15	77100000	77200000	di,iHH12	1.66143643471637,5.44227748824634	chr15	77121972	77128417	NONSUSG005948
15	82500000	82600000	di,CLR	1.79231215705216,933.42405346	chr15	82582232	82584961	NONSUSG006390
15	82800000	82900000	di,CLR	2.0753774963031,1094.88638536	chr15	82629208	82905227	NONSUSG005959
15	82900000	83000000	di,CLR	2.28736924594354,1045.15375432	chr15	82629208	82905227	NONSUSG005959
15	83100000	83200000	di,CLR	1.96879039196657,863.29141413	chr15	83161030	83267212	NONSUSG005960
15	83200000	83300000	di,CLR	1.33319382178511,813.65212252	chr15	83161030	83267212	NONSUSG005960
15	83200000	83300000	di,CLR	1.33319382178511,813.65212252	chr15	83282005	83283290	NONSUSG006391
15	83500000	83600000	di,CLR	1.51424805703642,776.06833329	chr15	83551135	83562669	NONSUSG005962
15	88600000	88700000	di,CLR	2.06374260080428,1157.45582616	chr15	88645724	88650806	NONSUSG006402
15	88600000	88700000	di,CLR	2.06374260080428,1157.45582616	chr15	88656055	88672495	NONSUSG006403
15	88600000	88700000	di,CLR	2.06374260080428,1157.45582616	chr15	88688226	88746008	NONSUSG006404
15	88700000	88800000	di,CLR	1.49807644957357,1053.68828442	chr15	88688226	88746008	NONSUSG006404
15	112900000	113000000	CLR,iHH12	1048.79450273,5.57811652587477	chr15	112903185	112903912	NONSUSG006033
15	114700000	114800000	di,CLR	2.56536388051813,4814.96886871	chr15	114767107	114769512	NONSUSG006480
15	120900000	121000000	di,CLR	1.73860139069817,1330.1778978	chr15	120923845	120926439	NONSUSG006054
15	120900000	121000000	di,CLR	1.73860139069817,1330.1778978	chr15	120958657	120972343	NONSUSG006055
15	145400000	145500000	di,CLR	1.33534407190722,2088.99743659	chr15	145463282	145464241	NONSUSG006119
15	145400000	145500000	di,CLR	1.33534407190722,2088.99743659	chr15	145408756	145420042	NONSUSG006571
15	146000000	146100000	di,CLR	1.70492336907059,1087.72844894	chr15	146086232	146087157	NONSUSG006121
15	146000000	146100000	di,CLR	1.70492336907059,1087.72844894	chr15	146034379	146041059	NONSUSG006574
15	146000000	146100000	di,CLR	1.70492336907059,1087.72844894	chr15	146054165	146057501	XLOC_006752
15	146000000	146100000	di,CLR	1.70492336907059,1087.72844894	chr15	146094309	146097132	NONSUSG006575
15	146100000	146200000	di,CLR	1.48889202810261,3384.94887212	chr15	146179702	146182702	NONSUSG006122
15	146100000	146200000	di,CLR	1.48889202810261,3384.94887212	chr15	146193638	146197981	NONSUSG006123
15	146200000	146300000	di,CLR	1.68743610261284,3843.92431635	chr15	146288070	146290069	NONSUSG006124
15	147000000	147100000	di,CLR	1.54141943824551,4392.97703969	chr15	147037012	147050088	NONSUSG006127
15	147000000	147100000	di,CLR	1.54141943824551,4392.97703969	chr15	146973186	147041769	NONSUSG006576
15	147100000	147200000	di,CLR	2.4336174206474,3586.7134151	chr15	147133393	147223078	NONSUSG006128
15	147100000	147200000	di,CLR	2.4336174206474,3586.7134151	chr15	147127901	147133896	NONSUSG006577
15	147200000	147300000	di,CLR	3.17603669839545,3440.04600246	chr15	147133393	147223078	NONSUSG006128
16	39800000	39900000	CLR,iHH12	1224.92916417,6.48365849414805	chr16	39775532	39829062	NONSUSG006973
16	52700000	52800000	di,iHH12	1.4725501642954,5.33465633175894	chr16	52741960	52933494	NONSUSG006769
16	57100000	57200000	CLR,iHH12	893.83538929,5.41949789508063	chr16	57196007	57199574	NONSUSG006795
17	36100000	36200000	di,CLR	1.44625010331063,1367.94219993	chr17	36169853	36172639	NONSUSG007237
17	36200000	36300000	di,CLR	1.65641540740075,986.48458052	chr17	36274262	36282460	NONSUSG007238
17	36200000	36300000	di,CLR	1.65641540740075,986.48458052	chr17	36235584	36239981	NONSUSG007501
17	36200000	36300000	di,CLR	1.65641540740075,986.48458052	chr17	36297938	36305317	NONSUSG007502
17	57400000	57500000	di,CLR	1.56332617791406,572.52575155	chr17	57435700	57460429	NONSUSG007328
17	57400000	57500000	di,CLR	1.56332617791406,572.52575155	chr17	57466089	57469614	NONSUSG007329
17	57400000	57500000	di,CLR	1.56332617791406,572.52575155	chr17	57478411	57481545	NONSUSG007330
17	57400000	57500000	di,CLR	1.56332617791406,572.52575155	chr17	57465343	57466009	NONSUSG007600
17	58000000	58100000	CLR,iHH12	672.78110083,8.49373503844958	chr17	58017068	58031282	NONSUSG007334
17	58500000	58600000	CLR,iHH12	1083.71257442,6.19194833291462	chr17	58471828	58516521	NONSUSG007335
17	58500000	58600000	CLR,iHH12	1083.71257442,6.19194833291462	chr17	58544589	58571778	NONSUSG007336
17	58500000	58600000	CLR,iHH12	1083.71257442,6.19194833291462	chr17	58500769	58502049	XLOC_007816
17	58600000	58700000	CLR,iHH12	1971.45960332,4.75097665208936	chr17	58696394	58697738	NONSUSG007606
18	1400000	1500000	di,CLR	2.19256438514433,1252.98287182	chr18	1492652	1498552	NONSUSG007692
18	1400000	1500000	di,CLR	2.19256438514433,1252.98287182	chr18	1486362	1489303	NONSUSG007937
18	1400000	1500000	di,CLR	2.19256438514433,1252.98287182	chr18	1495209	1497050	NONSUSG007938
18	42300000	42400000	CLR,iHH12	923.26925345,5.5471730943859	chr18	42350065	42374231	NONSUSG007830
18	42300000	42400000	CLR,iHH12	923.26925345,5.5471730943859	chr18	42289627	42312630	NONSUSG008093
18	42400000	42500000	CLR,iHH12	551.18307551,5.17840866436107	chr18	42413061	42417004	NONSUSG007831
18	42500000	42600000	CLR,iHH12	552.15022648,4.76066083831961	chr18	42561291	42645207	NONSUSG008094
18	51100000	51200000	di,CLR	1.36905006994365,1244.46802937	chr18	51179084	51304206	NONSUSG007876
18	51200000	51300000	di,CLR	2.3266068979342,631.28155769	chr18	51179084	51304206	NONSUSG007876

## Sheet: table S8
Table S8 The Results of Gene Ontology Enrichment Analyses
#Term	Database	ID	Input number	Background number	P-Value	Corrected P-Value	Input
cellular process	Gene Ontology	GO:0009987	217	14710	1.89811e-19	9.28554e-16	ENSG00000115421|ENSG00000092067|ENSG00000233927|ENSG00000145703|ENSG00000107175|ENSG00000157827|ENSG00000185920|ENSG00000088888|ENSG00000171596|ENSG00000163558|ENSG00000163888|ENSG00000137642|ENSG00000095585|ENSG00000095587|ENSG00000157107|ENSG00000164220|ENSG00000091831|ENSG00000115896|ENSG00000183431|ENSG00000197226|ENSG00000154127|ENSG00000105671|ENSG00000106070|ENSG00000204120|ENSG00000137078…
cell part	Gene Ontology	GO:0044464	221	15830	1.2645e-16	2.71128e-13	ENSG00000115421|ENSG00000092067|ENSG00000233927|ENSG00000145703|ENSG00000107175|ENSG00000157827|ENSG00000185920|ENSG00000088888|ENSG00000171596|ENSG00000120451|ENSG00000163558|ENSG00000163888|ENSG00000137642|ENSG00000095585|ENSG00000164309|ENSG00000235194|ENSG00000157107|ENSG00000164220|ENSG00000091831|ENSG00000115896|ENSG00000183431|ENSG00000157224|ENSG00000197226|ENSG00000154127|ENSG00000122254…
cell	Gene Ontology	GO:0005623	221	15857	1.66268e-16	2.71128e-13	ENSG00000115421|ENSG00000092067|ENSG00000233927|ENSG00000145703|ENSG00000107175|ENSG00000157827|ENSG00000185920|ENSG00000088888|ENSG00000171596|ENSG00000120451|ENSG00000163558|ENSG00000163888|ENSG00000137642|ENSG00000095585|ENSG00000164309|ENSG00000235194|ENSG00000157107|ENSG00000164220|ENSG00000091831|ENSG00000115896|ENSG00000183431|ENSG00000157224|ENSG00000197226|ENSG00000154127|ENSG00000122254…
intracellular	Gene Ontology	GO:0005622	201	13809	4.88736e-15	5.97724e-12	ENSG00000115421|ENSG00000092067|ENSG00000233927|ENSG00000145703|ENSG00000107175|ENSG00000122254|ENSG00000185920|ENSG00000088888|ENSG00000171596|ENSG00000163558|ENSG00000163888|ENSG00000137642|ENSG00000095585|ENSG00000164309|ENSG00000235194|ENSG00000157107|ENSG00000091831|ENSG00000115896|ENSG00000183431|ENSG00000197226|ENSG00000154127|ENSG00000157827|ENSG00000106070|ENSG00000143199|ENSG00000161202…
intracellular part	Gene Ontology	GO:0044424	195	13461	9.96754e-14	9.75224e-11	ENSG00000115421|ENSG00000092067|ENSG00000233927|ENSG00000145703|ENSG00000107175|ENSG00000122254|ENSG00000185920|ENSG00000088888|ENSG00000163092|ENSG00000163558|ENSG00000163888|ENSG00000137642|ENSG00000095585|ENSG00000164309|ENSG00000235194|ENSG00000157107|ENSG00000091831|ENSG00000115896|ENSG00000183431|ENSG00000154127|ENSG00000157827|ENSG00000106070|ENSG00000143199|ENSG00000161202|ENSG00000140463…
binding	Gene Ontology	GO:0005488	199	13967	1.77891e-13	1.4504e-10	ENSG00000115421|ENSG00000092067|ENSG00000233927|ENSG00000145703|ENSG00000107175|ENSG00000157827|ENSG00000185920|ENSG00000088888|ENSG00000163092|ENSG00000163558|ENSG00000163888|ENSG00000137642|ENSG00000095585|ENSG00000164309|ENSG00000095587|ENSG00000157107|ENSG00000164220|ENSG00000091831|ENSG00000115896|ENSG00000183431|ENSG00000157224|ENSG00000197226|ENSG00000154127|ENSG00000105671|ENSG00000106070…
protein binding	Gene Ontology	GO:0005515	166	10657	6.07387e-13	4.24477e-10	ENSG00000092067|ENSG00000233927|ENSG00000145703|ENSG00000107175|ENSG00000157827|ENSG00000185920|ENSG00000088888|ENSG00000163092|ENSG00000163558|ENSG00000163888|ENSG00000137642|ENSG00000095585|ENSG00000164309|ENSG00000157107|ENSG00000164220|ENSG00000091831|ENSG00000115896|ENSG00000183431|ENSG00000157224|ENSG00000197226|ENSG00000154127|ENSG00000004700|ENSG00000106070|ENSG00000143199|ENSG00000137078…
intracellular organelle	Gene Ontology	GO:0043229	175	11718	2.69757e-12	1.64956e-09	ENSG00000115421|ENSG00000092067|ENSG00000233927|ENSG00000145703|ENSG00000107175|ENSG00000122254|ENSG00000185920|ENSG00000163092|ENSG00000163558|ENSG00000163888|ENSG00000137642|ENSG00000164309|ENSG00000157107|ENSG00000091831|ENSG00000183431|ENSG00000154127|ENSG00000105671|ENSG00000143199|ENSG00000161202|ENSG00000140463|ENSG00000171530|ENSG00000124212|ENSG00000253293|ENSG00000158560|ENSG00000164532…
cytoplasm	Gene Ontology	GO:0005737	162	10491	4.75021e-12	2.582e-09	ENSG00000115421|ENSG00000107175|ENSG00000233927|ENSG00000145703|ENSG00000188215|ENSG00000122254|ENSG00000185920|ENSG00000088888|ENSG00000163092|ENSG00000163558|ENSG00000163888|ENSG00000137642|ENSG00000095585|ENSG00000164309|ENSG00000235194|ENSG00000157107|ENSG00000091831|ENSG00000115896|ENSG00000154127|ENSG00000157827|ENSG00000106070|ENSG00000143199|ENSG00000161202|ENSG00000140463|ENSG00000171530…
single-organism process	Gene Ontology	GO:0044699	183	12786	2.19041e-11	1.07155e-08	ENSG00000092067|ENSG00000233927|ENSG00000145703|ENSG00000107175|ENSG00000157827|ENSG00000185920|ENSG00000088888|ENSG00000171596|ENSG00000163558|ENSG00000163888|ENSG00000137642|ENSG00000095585|ENSG00000235194|ENSG00000157107|ENSG00000164220|ENSG00000091831|ENSG00000115896|ENSG00000197226|ENSG00000154127|ENSG00000106070|ENSG00000204120|ENSG00000137078|ENSG00000161202|ENSG00000140463|ENSG00000107140…
organelle	Gene Ontology	GO:0043226	182	12728	3.2395e-11	1.44069e-08	ENSG00000115421|ENSG00000092067|ENSG00000233927|ENSG00000145703|ENSG00000107175|ENSG00000122254|ENSG00000185920|ENSG00000163092|ENSG00000163558|ENSG00000163888|ENSG00000137642|ENSG00000164309|ENSG00000157107|ENSG00000091831|ENSG00000183431|ENSG00000154127|ENSG00000105671|ENSG00000143199|ENSG00000137078|ENSG00000161202|ENSG00000140463|ENSG00000171530|ENSG00000163162|ENSG00000124212|ENSG00000253293…
organelle part	Gene Ontology	GO:0044422	134	8191	7.75978e-11	3.16341e-08	ENSG00000115421|ENSG00000107175|ENSG00000233927|ENSG00000101224|ENSG00000105671|ENSG00000185920|ENSG00000163092|ENSG00000163558|ENSG00000163888|ENSG00000137642|ENSG00000164309|ENSG00000091831|ENSG00000183431|ENSG00000004700|ENSG00000161202|ENSG00000122008|ENSG00000171530|ENSG00000124212|ENSG00000158560|ENSG00000148950|ENSG00000115286|ENSG00000101222|ENSG00000145703|ENSG00000215271|ENSG00000004864…
metabolic process	Gene Ontology	GO:0008152	160	10669	1.21149e-10	4.55892e-08	ENSG00000115421|ENSG00000092067|ENSG00000233927|ENSG00000107175|ENSG00000122254|ENSG00000185920|ENSG00000088888|ENSG00000163558|ENSG00000163888|ENSG00000137642|ENSG00000235194|ENSG00000091831|ENSG00000115896|ENSG00000183431|ENSG00000154127|ENSG00000105671|ENSG00000106070|ENSG00000204120|ENSG00000161202|ENSG00000122008|ENSG00000107140|ENSG00000163162|ENSG00000124212|ENSG00000253293|ENSG00000164532…
primary metabolic process	Gene Ontology	GO:0044238	151	9849	1.75236e-10	6.12324e-08	ENSG00000115421|ENSG00000092067|ENSG00000233927|ENSG00000107175|ENSG00000105671|ENSG00000185920|ENSG00000088888|ENSG00000163558|ENSG00000163888|ENSG00000137642|ENSG00000235194|ENSG00000091831|ENSG00000115896|ENSG00000183431|ENSG00000154127|ENSG00000004700|ENSG00000106070|ENSG00000204120|ENSG00000161202|ENSG00000122008|ENSG00000107140|ENSG00000163162|ENSG00000124212|ENSG00000253293|ENSG00000164532…
single-organism cellular process	Gene Ontology	GO:0044763	168	11549	2.55961e-10	8.34774e-08	ENSG00000092067|ENSG00000233927|ENSG00000145703|ENSG00000107175|ENSG00000157827|ENSG00000185920|ENSG00000088888|ENSG00000105676|ENSG00000163558|ENSG00000163888|ENSG00000137642|ENSG00000095585|ENSG00000235194|ENSG00000157107|ENSG00000164220|ENSG00000091831|ENSG00000115896|ENSG00000197226|ENSG00000154127|ENSG00000106070|ENSG00000204120|ENSG00000137078|ENSG00000161202|ENSG00000140463|ENSG00000163162…
nucleobase-containing compound metabolic process	Gene Ontology	GO:0006139	102	5606	3.12719e-10	9.5614e-08	ENSG00000115421|ENSG00000107175|ENSG00000233927|ENSG00000105671|ENSG00000185920|ENSG00000163558|ENSG00000091831|ENSG00000183431|ENSG00000004700|ENSG00000143199|ENSG00000161202|ENSG00000122008|ENSG00000124212|ENSG00000253293|ENSG00000164532|ENSG00000163273|ENSG00000115286|ENSG00000215271|ENSG00000004864|ENSG00000132436|ENSG00000152382|ENSG00000196365|ENSG00000143164|ENSG00000131459|ENSG00000050748…
cellular nitrogen compound metabolic process	Gene Ontology	GO:0034641	110	6273	3.41727e-10	9.83369e-08	ENSG00000115421|ENSG00000107175|ENSG00000233927|ENSG00000105671|ENSG00000185920|ENSG00000163558|ENSG00000137642|ENSG00000091831|ENSG00000183431|ENSG00000004700|ENSG00000204120|ENSG00000161202|ENSG00000122008|ENSG00000124212|ENSG00000253293|ENSG00000164532|ENSG00000163273|ENSG00000148950|ENSG00000115286|ENSG00000215271|ENSG00000004864|ENSG00000132437|ENSG00000132436|ENSG00000152382|ENSG00000196365…
cellular metabolic process	Gene Ontology	GO:0044237	150	9870	4.62105e-10	1.2559e-07	ENSG00000115421|ENSG00000092067|ENSG00000233927|ENSG00000107175|ENSG00000105671|ENSG00000185920|ENSG00000088888|ENSG00000163558|ENSG00000163888|ENSG00000137642|ENSG00000235194|ENSG00000091831|ENSG00000115896|ENSG00000183431|ENSG00000154127|ENSG00000004700|ENSG00000106070|ENSG00000204120|ENSG00000161202|ENSG00000122008|ENSG00000107140|ENSG00000163162|ENSG00000124212|ENSG00000253293|ENSG00000164532…
heterocycle metabolic process	Gene Ontology	GO:0046483	103	5731	4.88391e-10	1.25748e-07	ENSG00000115421|ENSG00000107175|ENSG00000233927|ENSG00000105671|ENSG00000185920|ENSG00000163558|ENSG00000091831|ENSG00000183431|ENSG00000004700|ENSG00000143199|ENSG00000161202|ENSG00000122008|ENSG00000124212|ENSG00000253293|ENSG00000164532|ENSG00000163273|ENSG00000115286|ENSG00000215271|ENSG00000004864|ENSG00000132437|ENSG00000132436|ENSG00000152382|ENSG00000196365|ENSG00000143164|ENSG00000131459…
cellular aromatic compound metabolic process	Gene Ontology	GO:0006725	103	5779	7.90338e-10	1.79113e-07	ENSG00000115421|ENSG00000107175|ENSG00000233927|ENSG00000105671|ENSG00000185920|ENSG00000163558|ENSG00000091831|ENSG00000183431|ENSG00000004700|ENSG00000143199|ENSG00000161202|ENSG00000122008|ENSG00000124212|ENSG00000253293|ENSG00000164532|ENSG00000163273|ENSG00000115286|ENSG00000215271|ENSG00000004864|ENSG00000132437|ENSG00000132436|ENSG00000152382|ENSG00000196365|ENSG00000143164|ENSG00000131459…
intracellular membrane-bounded organelle	Gene Ontology	GO:0043231	158	10709	8.2549e-10	1.79113e-07	ENSG00000115421|ENSG00000092067|ENSG00000233927|ENSG00000107175|ENSG00000122254|ENSG00000185920|ENSG00000163558|ENSG00000163888|ENSG00000137642|ENSG00000157107|ENSG00000091831|ENSG00000183431|ENSG00000154127|ENSG00000105671|ENSG00000143199|ENSG00000161202|ENSG00000122008|ENSG00000171530|ENSG00000124212|ENSG00000253293|ENSG00000158560|ENSG00000164532|ENSG00000163273|ENSG00000148950|ENSG00000198722…
organic cyclic compound metabolic process	Gene Ontology	GO:1901360	105	5948	8.2628e-10	1.79113e-07	ENSG00000115421|ENSG00000107175|ENSG00000233927|ENSG00000105671|ENSG00000185920|ENSG00000163558|ENSG00000137642|ENSG00000091831|ENSG00000183431|ENSG00000004700|ENSG00000143199|ENSG00000161202|ENSG00000122008|ENSG00000124212|ENSG00000253293|ENSG00000164532|ENSG00000163273|ENSG00000115286|ENSG00000215271|ENSG00000004864|ENSG00000132437|ENSG00000132436|ENSG00000152382|ENSG00000196365|ENSG00000143164…
intracellular organelle part	Gene Ontology	GO:0044446	129	8011	8.42108e-10	1.79113e-07	ENSG00000115421|ENSG00000107175|ENSG00000233927|ENSG00000101224|ENSG00000105671|ENSG00000185920|ENSG00000163558|ENSG00000163888|ENSG00000137642|ENSG00000091831|ENSG00000183431|ENSG00000004700|ENSG00000161202|ENSG00000122008|ENSG00000171530|ENSG00000124212|ENSG00000158560|ENSG00000148950|ENSG00000115286|ENSG00000101222|ENSG00000145703|ENSG00000215271|ENSG00000004864|ENSG00000145708|ENSG00000132436…
membrane-bounded organelle	Gene Ontology	GO:0043227	169	11841	1.16905e-09	2.38291e-07	ENSG00000115421|ENSG00000092067|ENSG00000233927|ENSG00000145703|ENSG00000107175|ENSG00000122254|ENSG00000185920|ENSG00000163558|ENSG00000163888|ENSG00000137642|ENSG00000157107|ENSG00000091831|ENSG00000183431|ENSG00000154127|ENSG00000105671|ENSG00000143199|ENSG00000137078|ENSG00000161202|ENSG00000122008|ENSG00000171530|ENSG00000163162|ENSG00000124212|ENSG00000253293|ENSG00000158560|ENSG00000164532…
organic substance metabolic process	Gene Ontology	GO:0071704	153	10301	1.49795e-09	2.93119e-07	ENSG00000115421|ENSG00000092067|ENSG00000233927|ENSG00000107175|ENSG00000122254|ENSG00000185920|ENSG00000088888|ENSG00000163558|ENSG00000163888|ENSG00000137642|ENSG00000235194|ENSG00000091831|ENSG00000115896|ENSG00000183431|ENSG00000154127|ENSG00000105671|ENSG00000106070|ENSG00000204120|ENSG00000161202|ENSG00000122008|ENSG00000107140|ENSG00000163162|ENSG00000124212|ENSG00000253293|ENSG00000164532…
nitrogen compound metabolic process	Gene Ontology	GO:0006807	112	6701	3.87833e-09	7.29723e-07	ENSG00000115421|ENSG00000107175|ENSG00000233927|ENSG00000122254|ENSG00000185920|ENSG00000163558|ENSG00000137642|ENSG00000091831|ENSG00000183431|ENSG00000004700|ENSG00000204120|ENSG00000161202|ENSG00000122008|ENSG00000124212|ENSG00000253293|ENSG00000164532|ENSG00000163273|ENSG00000148950|ENSG00000115286|ENSG00000215271|ENSG00000004864|ENSG00000132437|ENSG00000132436|ENSG00000152382|ENSG00000196365…
cellular macromolecule metabolic process	Gene Ontology	GO:0044260	128	8132	5.02278e-09	9.10054e-07	ENSG00000115421|ENSG00000092067|ENSG00000233927|ENSG00000107175|ENSG00000105671|ENSG00000185920|ENSG00000163558|ENSG00000163888|ENSG00000137642|ENSG00000235194|ENSG00000091831|ENSG00000115896|ENSG00000183431|ENSG00000154127|ENSG00000004700|ENSG00000106070|ENSG00000204120|ENSG00000161202|ENSG00000122008|ENSG00000107140|ENSG00000163162|ENSG00000124212|ENSG00000253293|ENSG00000164532|ENSG00000163273…
biological regulation	Gene Ontology	GO:0065007	160	11181	6.99561e-09	1.22223e-06	ENSG00000092067|ENSG00000145703|ENSG00000107175|ENSG00000157827|ENSG00000185920|ENSG00000088888|ENSG00000171596|ENSG00000163558|ENSG00000163888|ENSG00000137642|ENSG00000095585|ENSG00000235194|ENSG00000164220|ENSG00000091831|ENSG00000115896|ENSG00000197226|ENSG00000154127|ENSG00000106070|ENSG00000204120|ENSG00000137078|ENSG00000161202|ENSG00000161203|ENSG00000163162|ENSG00000124212|ENSG00000253293…
cellular response to stimulus	Gene Ontology	GO:0051716	111	6791	1.79557e-08	3.02894e-06	ENSG00000107175|ENSG00000185920|ENSG00000213316|ENSG00000163558|ENSG00000137642|ENSG00000095585|ENSG00000175414|ENSG00000164220|ENSG00000091831|ENSG00000115896|ENSG00000154127|ENSG00000004700|ENSG00000106070|ENSG00000204120|ENSG00000137078|ENSG00000137076|ENSG00000122008|ENSG00000163162|ENSG00000124212|ENSG00000164532|ENSG00000163273|ENSG00000198722|ENSG00000145703|ENSG00000145708|ENSG00000132437…
macromolecule metabolic process	Gene Ontology	GO:0043170	133	8772	2.2247e-08	3.62775e-06	ENSG00000115421|ENSG00000092067|ENSG00000233927|ENSG00000107175|ENSG00000122254|ENSG00000185920|ENSG00000163558|ENSG00000163888|ENSG00000137642|ENSG00000235194|ENSG00000091831|ENSG00000115896|ENSG00000183431|ENSG00000154127|ENSG00000004700|ENSG00000106070|ENSG00000204120|ENSG00000161202|ENSG00000122008|ENSG00000107140|ENSG00000163162|ENSG00000124212|ENSG00000253293|ENSG00000164532|ENSG00000163273…
phosphate-containing compound metabolic process	Gene Ontology	GO:0006796	63	3012	2.44868e-08	3.86417e-06	ENSG00000101126|ENSG00000130766|ENSG00000109911|ENSG00000164919|ENSG00000010932|ENSG00000000419|ENSG00000065534|ENSG00000142657|ENSG00000165671|ENSG00000163558|ENSG00000163888|ENSG00000137642|ENSG00000211455|ENSG00000235194|ENSG00000179335|ENSG00000161021|ENSG00000091831|ENSG00000143158|ENSG00000127445|ENSG00000169220|ENSG00000023228|ENSG00000143155|ENSG00000154127|ENSG00000141425|ENSG00000070366…
phosphorus metabolic process	Gene Ontology	GO:0006793	63	3020	2.70016e-08	4.12788e-06	ENSG00000101126|ENSG00000130766|ENSG00000109911|ENSG00000164919|ENSG00000010932|ENSG00000000419|ENSG00000065534|ENSG00000142657|ENSG00000165671|ENSG00000163558|ENSG00000163888|ENSG00000137642|ENSG00000211455|ENSG00000235194|ENSG00000179335|ENSG00000161021|ENSG00000091831|ENSG00000143158|ENSG00000127445|ENSG00000169220|ENSG00000023228|ENSG00000143155|ENSG00000154127|ENSG00000141425|ENSG00000070366…
cytoplasmic part	Gene Ontology	GO:0044444	122	7924	6.94304e-08	1.02925e-05	ENSG00000107175|ENSG00000233927|ENSG00000145703|ENSG00000188215|ENSG00000122254|ENSG00000185920|ENSG00000163092|ENSG00000163558|ENSG00000163888|ENSG00000137642|ENSG00000095585|ENSG00000164309|ENSG00000235194|ENSG00000157107|ENSG00000091831|ENSG00000157827|ENSG00000106070|ENSG00000143199|ENSG00000137076|ENSG00000161203|ENSG00000107140|ENSG00000124212|ENSG00000158560|ENSG00000163273|ENSG00000148950…
regulation of cellular process	Gene Ontology	GO:0050794	145	10064	7.90741e-08	1.13774e-05	ENSG00000092067|ENSG00000145703|ENSG00000107175|ENSG00000157827|ENSG00000185920|ENSG00000171596|ENSG00000163558|ENSG00000163888|ENSG00000137642|ENSG00000095585|ENSG00000235194|ENSG00000164220|ENSG00000091831|ENSG00000115896|ENSG00000197226|ENSG00000154127|ENSG00000106070|ENSG00000204120|ENSG00000137078|ENSG00000161202|ENSG00000161203|ENSG00000163162|ENSG00000124212|ENSG00000253293|ENSG00000164532…
regulation of biological process	Gene Ontology	GO:0050789	150	10577	1.00677e-07	1.40718e-05	ENSG00000092067|ENSG00000145703|ENSG00000107175|ENSG00000157827|ENSG00000185920|ENSG00000171596|ENSG00000163558|ENSG00000163888|ENSG00000137642|ENSG00000095585|ENSG00000235194|ENSG00000164220|ENSG00000091831|ENSG00000115896|ENSG00000197226|ENSG00000154127|ENSG00000106070|ENSG00000204120|ENSG00000137078|ENSG00000161202|ENSG00000161203|ENSG00000163162|ENSG00000124212|ENSG00000253293|ENSG00000164532…
enzyme binding	Gene Ontology	GO:0019899	43	1754	1.08555e-07	1.47515e-05	ENSG00000188215|ENSG00000109911|ENSG00000145703|ENSG00000197226|ENSG00000157827|ENSG00000100813|ENSG00000197081|ENSG00000163888|ENSG00000137642|ENSG00000095585|ENSG00000161021|ENSG00000091831|ENSG00000204764|ENSG00000198648|ENSG00000127445|ENSG00000169220|ENSG00000147889|ENSG00000070366|ENSG00000122188|ENSG00000143199|ENSG00000137078|ENSG00000161202|ENSG00000088888|ENSG00000172216|ENSG00000135930…
transport	Gene Ontology	GO:0006810	80	4471	1.54994e-07	2.04927e-05	ENSG00000092067|ENSG00000107175|ENSG00000233927|ENSG00000065534|ENSG00000130766|ENSG00000197226|ENSG00000164919|ENSG00000185920|ENSG00000142655|ENSG00000197081|ENSG00000184611|ENSG00000174448|ENSG00000171596|ENSG00000115602|ENSG00000113163|ENSG00000070366|ENSG00000163558|ENSG00000137642|ENSG00000054523|ENSG00000176783|ENSG00000115268|ENSG00000091831|ENSG00000204764|ENSG00000143158|ENSG00000180251…
regulation of primary metabolic process	Gene Ontology	GO:0080090	93	5651	4.4907e-07	5.78118e-05	ENSG00000107175|ENSG00000188215|ENSG00000185920|ENSG00000163558|ENSG00000163888|ENSG00000137642|ENSG00000235194|ENSG00000091831|ENSG00000115896|ENSG00000154127|ENSG00000106070|ENSG00000204120|ENSG00000161202|ENSG00000163162|ENSG00000124212|ENSG00000253293|ENSG00000164532|ENSG00000163273|ENSG00000101224|ENSG00000215271|ENSG00000132436|ENSG00000152382|ENSG00000196365|ENSG00000276023|ENSG00000143164…
nucleic acid metabolic process	Gene Ontology	GO:0090304	85	4997	4.75103e-07	5.9595e-05	ENSG00000115421|ENSG00000144535|ENSG00000233927|ENSG00000152382|ENSG00000130766|ENSG00000198914|ENSG00000160049|ENSG00000107175|ENSG00000105671|ENSG00000185920|ENSG00000171540|ENSG00000124212|ENSG00000165671|ENSG00000142655|ENSG00000163558|ENSG00000136715|ENSG00000073614|ENSG00000006468|ENSG00000114933|ENSG00000071626|ENSG00000179335|ENSG00000161021|ENSG00000091831|ENSG00000144231|ENSG00000127445…
establishment of localization	Gene Ontology	GO:0051234	80	4598	4.98585e-07	6.0977e-05	ENSG00000092067|ENSG00000107175|ENSG00000233927|ENSG00000065534|ENSG00000130766|ENSG00000197226|ENSG00000164919|ENSG00000185920|ENSG00000142655|ENSG00000197081|ENSG00000184611|ENSG00000174448|ENSG00000171596|ENSG00000115602|ENSG00000113163|ENSG00000070366|ENSG00000163558|ENSG00000137642|ENSG00000054523|ENSG00000176783|ENSG00000115268|ENSG00000091831|ENSG00000204764|ENSG00000143158|ENSG00000180251…
localization	Gene Ontology	GO:0051179	92	5597	5.71789e-07	6.82242e-05	ENSG00000107175|ENSG00000233927|ENSG00000185920|ENSG00000163558|ENSG00000137642|ENSG00000157107|ENSG00000091831|ENSG00000154127|ENSG00000106070|ENSG00000137076|ENSG00000131746|ENSG00000158560|ENSG00000164532|ENSG00000145708|ENSG00000204634|ENSG00000132437|ENSG00000127914|ENSG00000151208|ENSG00000170049|ENSG00000050748|ENSG00000170043|ENSG00000065534|ENSG00000164919|ENSG00000084234|ENSG00000142655…
negative regulation of cell communication	Gene Ontology	GO:0010648	32	1193	8.84739e-07	0.000103051	ENSG00000107175|ENSG00000058668|ENSG00000130766|ENSG00000185920|ENSG00000137642|ENSG00000106070|ENSG00000178175|ENSG00000091831|ENSG00000127445|ENSG00000169220|ENSG00000141753|ENSG00000154127|ENSG00000115266|ENSG00000140443|ENSG00000155011|ENSG00000164532|ENSG00000161202|ENSG00000161203|ENSG00000136244|ENSG00000107731|ENSG00000163162|ENSG00000122188|ENSG00000196781|ENSG00000106443|ENSG00000145708…
negative regulation of signaling	Gene Ontology	GO:0023057	32	1197	9.48958e-07	0.000107961	ENSG00000107175|ENSG00000058668|ENSG00000130766|ENSG00000185920|ENSG00000137642|ENSG00000106070|ENSG00000178175|ENSG00000091831|ENSG00000127445|ENSG00000169220|ENSG00000141753|ENSG00000154127|ENSG00000115266|ENSG00000140443|ENSG00000155011|ENSG00000164532|ENSG00000161202|ENSG00000161203|ENSG00000136244|ENSG00000107731|ENSG00000163162|ENSG00000122188|ENSG00000196781|ENSG00000106443|ENSG00000145708…
response to stimulus	Gene Ontology	GO:0050896	120	8122	1.08801e-06	0.000120967	ENSG00000107175|ENSG00000188215|ENSG00000185920|ENSG00000213316|ENSG00000163558|ENSG00000137642|ENSG00000095585|ENSG00000175414|ENSG00000164220|ENSG00000091831|ENSG00000115896|ENSG00000154127|ENSG00000004700|ENSG00000106070|ENSG00000204120|ENSG00000137078|ENSG00000137076|ENSG00000122008|ENSG00000161204|ENSG00000163162|ENSG00000124212|ENSG00000164532|ENSG00000163273|ENSG00000198722|ENSG00000145703…
negative regulation of signal transduction	Gene Ontology	GO:0009968	30	1089	1.1821e-06	0.000128507	ENSG00000107175|ENSG00000130766|ENSG00000185920|ENSG00000137642|ENSG00000106070|ENSG00000178175|ENSG00000091831|ENSG00000127445|ENSG00000169220|ENSG00000141753|ENSG00000154127|ENSG00000115266|ENSG00000140443|ENSG00000155011|ENSG00000164532|ENSG00000161202|ENSG00000161203|ENSG00000107731|ENSG00000163162|ENSG00000122188|ENSG00000196781|ENSG00000106443|ENSG00000145708|ENSG00000132436|ENSG00000132554…
cell communication	Gene Ontology	GO:0007154	96	6045	1.36587e-06	0.000145257	ENSG00000107175|ENSG00000185920|ENSG00000213316|ENSG00000163558|ENSG00000137642|ENSG00000095585|ENSG00000175414|ENSG00000164220|ENSG00000091831|ENSG00000115896|ENSG00000154127|ENSG00000106070|ENSG00000204120|ENSG00000137078|ENSG00000137076|ENSG00000161203|ENSG00000163162|ENSG00000124212|ENSG00000164532|ENSG00000163273|ENSG00000145703|ENSG00000145708|ENSG00000132436|ENSG00000139144|ENSG00000276023…
nucleus	Gene Ontology	GO:0005634	105	6833	1.48893e-06	0.000154976	ENSG00000115421|ENSG00000092067|ENSG00000233927|ENSG00000107175|ENSG00000105671|ENSG00000163558|ENSG00000163888|ENSG00000137642|ENSG00000091831|ENSG00000183431|ENSG00000154127|ENSG00000004700|ENSG00000143199|ENSG00000161202|ENSG00000122008|ENSG00000171530|ENSG00000124212|ENSG00000253293|ENSG00000158560|ENSG00000164532|ENSG00000101224|ENSG00000215271|ENSG00000145708|ENSG00000132436|ENSG00000152382…
regulation of molecular function	Gene Ontology	GO:0065009	55	2795	1.62735e-06	0.000163438	ENSG00000107175|ENSG00000101126|ENSG00000130766|ENSG00000188215|ENSG00000185920|ENSG00000088888|ENSG00000084234|ENSG00000165671|ENSG00000142655|ENSG00000163558|ENSG00000163888|ENSG00000137642|ENSG00000073614|ENSG00000153201|ENSG00000147883|ENSG00000091831|ENSG00000198648|ENSG00000127445|ENSG00000169220|ENSG00000147889|ENSG00000197226|ENSG00000154127|ENSG00000171596|ENSG00000145708|ENSG00000107185…
membrane	Gene Ontology	GO:0016020	127	8822	1.63705e-06	0.000163438	ENSG00000115421|ENSG00000107175|ENSG00000188215|ENSG00000122254|ENSG00000185920|ENSG00000213316|ENSG00000163558|ENSG00000137642|ENSG00000095585|ENSG00000157107|ENSG00000164220|ENSG00000091831|ENSG00000115896|ENSG00000157224|ENSG00000197226|ENSG00000004700|ENSG00000106070|ENSG00000204120|ENSG00000137078|ENSG00000137076|ENSG00000161203|ENSG00000161204|ENSG00000163162|ENSG00000124212|ENSG00000148950…
regulation of macromolecule metabolic process	Gene Ontology	GO:0060255	91	5658	1.80669e-06	0.000176767	ENSG00000107175|ENSG00000188215|ENSG00000185920|ENSG00000163558|ENSG00000163888|ENSG00000137642|ENSG00000235194|ENSG00000091831|ENSG00000115896|ENSG00000154127|ENSG00000106070|ENSG00000204120|ENSG00000161202|ENSG00000163162|ENSG00000124212|ENSG00000253293|ENSG00000164532|ENSG00000163273|ENSG00000101224|ENSG00000215271|ENSG00000132436|ENSG00000152382|ENSG00000196365|ENSG00000276023|ENSG00000143164…
single-organism transport	Gene Ontology	GO:0044765	53	2667	1.98589e-06	0.00019049	ENSG00000092067|ENSG00000107175|ENSG00000233927|ENSG00000130766|ENSG00000003147|ENSG00000164919|ENSG00000185920|ENSG00000184611|ENSG00000174448|ENSG00000115602|ENSG00000113163|ENSG00000142655|ENSG00000163558|ENSG00000137642|ENSG00000054523|ENSG00000115268|ENSG00000091831|ENSG00000204764|ENSG00000143158|ENSG00000198722|ENSG00000154127|ENSG00000115266|ENSG00000145708|ENSG00000106070|ENSG00000140463…
single organism signaling	Gene Ontology	GO:0044700	95	6018	2.12031e-06	0.000199472	ENSG00000107175|ENSG00000185920|ENSG00000163558|ENSG00000137642|ENSG00000095585|ENSG00000175414|ENSG00000164220|ENSG00000091831|ENSG00000115896|ENSG00000154127|ENSG00000106070|ENSG00000204120|ENSG00000137078|ENSG00000137076|ENSG00000161203|ENSG00000163162|ENSG00000124212|ENSG00000164532|ENSG00000163273|ENSG00000145703|ENSG00000145708|ENSG00000132436|ENSG00000139144|ENSG00000276023|ENSG00000151208…
signaling	Gene Ontology	GO:0023052	95	6024	2.21763e-06	0.000204691	ENSG00000107175|ENSG00000185920|ENSG00000163558|ENSG00000137642|ENSG00000095585|ENSG00000175414|ENSG00000164220|ENSG00000091831|ENSG00000115896|ENSG00000154127|ENSG00000106070|ENSG00000204120|ENSG00000137078|ENSG00000137076|ENSG00000161203|ENSG00000163162|ENSG00000124212|ENSG00000164532|ENSG00000163273|ENSG00000145703|ENSG00000145708|ENSG00000132436|ENSG00000139144|ENSG00000276023|ENSG00000151208…
cellular component organization or biogenesis	Gene Ontology	GO:0071840	95	6038	2.46142e-06	0.000222986	ENSG00000107175|ENSG00000233927|ENSG00000145703|ENSG00000188215|ENSG00000157827|ENSG00000185920|ENSG00000163092|ENSG00000163558|ENSG00000137642|ENSG00000095587|ENSG00000157107|ENSG00000091831|ENSG00000183431|ENSG00000197226|ENSG00000105671|ENSG00000137076|ENSG00000161203|ENSG00000171530|ENSG00000164532|ENSG00000148950|ENSG00000115286|ENSG00000101224|ENSG00000204634|ENSG00000132436|ENSG00000127914…
regulation of cellular metabolic process	Gene Ontology	GO:0031323	91	5707	2.62944e-06	0.000233876	ENSG00000107175|ENSG00000188215|ENSG00000185920|ENSG00000163558|ENSG00000163888|ENSG00000137642|ENSG00000235194|ENSG00000091831|ENSG00000115896|ENSG00000154127|ENSG00000106070|ENSG00000204120|ENSG00000161202|ENSG00000163162|ENSG00000124212|ENSG00000253293|ENSG00000164532|ENSG00000163273|ENSG00000101224|ENSG00000215271|ENSG00000132436|ENSG00000152382|ENSG00000196365|ENSG00000276023|ENSG00000143164…
cellular component organization	Gene Ontology	GO:0016043	93	5889	2.88729e-06	0.000252225	ENSG00000107175|ENSG00000233927|ENSG00000145703|ENSG00000188215|ENSG00000157827|ENSG00000185920|ENSG00000163092|ENSG00000163558|ENSG00000137642|ENSG00000095587|ENSG00000157107|ENSG00000091831|ENSG00000183431|ENSG00000147889|ENSG00000197226|ENSG00000004700|ENSG00000137076|ENSG00000161203|ENSG00000171530|ENSG00000164532|ENSG00000148950|ENSG00000115286|ENSG00000101224|ENSG00000204634|ENSG00000132436…
negative regulation of macromolecule metabolic process	Gene Ontology	GO:0010605	47	2273	3.03582e-06	0.000260548	ENSG00000058668|ENSG00000198914|ENSG00000160049|ENSG00000185920|ENSG00000100813|ENSG00000084234|ENSG00000165671|ENSG00000142655|ENSG00000136715|ENSG00000163888|ENSG00000137642|ENSG00000073614|ENSG00000178175|ENSG00000091831|ENSG00000198648|ENSG00000127445|ENSG00000169220|ENSG00000147889|ENSG00000143155|ENSG00000154127|ENSG00000106070|ENSG00000070366|ENSG00000134046|ENSG00000122188|ENSG00000140443…
signal transduction	Gene Ontology	GO:0007165	89	5583	3.68932e-06	0.000300458	ENSG00000107175|ENSG00000185920|ENSG00000163558|ENSG00000137642|ENSG00000095585|ENSG00000175414|ENSG00000164220|ENSG00000091831|ENSG00000115896|ENSG00000154127|ENSG00000106070|ENSG00000204120|ENSG00000137078|ENSG00000137076|ENSG00000161203|ENSG00000163162|ENSG00000124212|ENSG00000164532|ENSG00000163273|ENSG00000145703|ENSG00000145708|ENSG00000132436|ENSG00000139144|ENSG00000276023|ENSG00000151208…
regulation of phosphate metabolic process	Gene Ontology	GO:0019220	37	1603	3.74982e-06	0.000300458	ENSG00000101126|ENSG00000130766|ENSG00000165671|ENSG00000163888|ENSG00000137642|ENSG00000147883|ENSG00000091831|ENSG00000198648|ENSG00000127445|ENSG00000169220|ENSG00000147889|ENSG00000143155|ENSG00000154127|ENSG00000099864|ENSG00000070366|ENSG00000140443|ENSG00000161202|ENSG00000136244|ENSG00000127914|ENSG00000109911|ENSG00000163162|ENSG00000122188|ENSG00000163273|ENSG00000101224|ENSG00000112186…
single-organism localization	Gene Ontology	GO:1902578	55	2875	3.78151e-06	0.000300458	ENSG00000092067|ENSG00000107175|ENSG00000233927|ENSG00000130766|ENSG00000003147|ENSG00000164919|ENSG00000185920|ENSG00000184611|ENSG00000174448|ENSG00000115602|ENSG00000113163|ENSG00000142655|ENSG00000163558|ENSG00000137642|ENSG00000054523|ENSG00000115268|ENSG00000091831|ENSG00000204764|ENSG00000143158|ENSG00000198722|ENSG00000154127|ENSG00000115266|ENSG00000145708|ENSG00000106070|ENSG00000140463…
regulation of phosphorus metabolic process	Gene Ontology	GO:0051174	37	1604	3.80244e-06	0.000300458	ENSG00000101126|ENSG00000130766|ENSG00000165671|ENSG00000163888|ENSG00000137642|ENSG00000147883|ENSG00000091831|ENSG00000198648|ENSG00000127445|ENSG00000169220|ENSG00000147889|ENSG00000143155|ENSG00000154127|ENSG00000099864|ENSG00000070366|ENSG00000140443|ENSG00000161202|ENSG00000136244|ENSG00000127914|ENSG00000109911|ENSG00000163162|ENSG00000122188|ENSG00000163273|ENSG00000101224|ENSG00000112186…
regulation of metabolic process	Gene Ontology	GO:0019222	94	6013	3.84124e-06	0.000300458	ENSG00000107175|ENSG00000188215|ENSG00000185920|ENSG00000163558|ENSG00000163888|ENSG00000137642|ENSG00000235194|ENSG00000091831|ENSG00000115896|ENSG00000154127|ENSG00000106070|ENSG00000204120|ENSG00000161202|ENSG00000163162|ENSG00000124212|ENSG00000253293|ENSG00000164532|ENSG00000163273|ENSG00000101224|ENSG00000215271|ENSG00000132436|ENSG00000152382|ENSG00000196365|ENSG00000276023|ENSG00000143164…
organic substance biosynthetic process	Gene Ontology	GO:1901576	94	6014	3.86935e-06	0.000300458	ENSG00000107175|ENSG00000233927|ENSG00000122254|ENSG00000185920|ENSG00000163558|ENSG00000235194|ENSG00000091831|ENSG00000106070|ENSG00000204120|ENSG00000161202|ENSG00000122008|ENSG00000124212|ENSG00000253293|ENSG00000164532|ENSG00000163273|ENSG00000215271|ENSG00000004864|ENSG00000132437|ENSG00000139144|ENSG00000152382|ENSG00000196365|ENSG00000143164|ENSG00000131459|ENSG00000050748|ENSG00000135945…
biosynthetic process	Gene Ontology	GO:0009058	95	6109	4.14075e-06	0.000316509	ENSG00000107175|ENSG00000233927|ENSG00000122254|ENSG00000185920|ENSG00000163558|ENSG00000235194|ENSG00000091831|ENSG00000106070|ENSG00000204120|ENSG00000161202|ENSG00000122008|ENSG00000124212|ENSG00000253293|ENSG00000164532|ENSG00000163273|ENSG00000215271|ENSG00000004864|ENSG00000132437|ENSG00000139144|ENSG00000152382|ENSG00000196365|ENSG00000143164|ENSG00000131459|ENSG00000170946|ENSG00000050748…
negative regulation of metabolic process	Gene Ontology	GO:0009892	49	2472	5.66904e-06	0.000426661	ENSG00000058668|ENSG00000198914|ENSG00000160049|ENSG00000185920|ENSG00000100813|ENSG00000084234|ENSG00000165671|ENSG00000142655|ENSG00000136715|ENSG00000163888|ENSG00000137642|ENSG00000073614|ENSG00000178175|ENSG00000091831|ENSG00000198648|ENSG00000127445|ENSG00000169220|ENSG00000147889|ENSG00000143155|ENSG00000154127|ENSG00000162924|ENSG00000070366|ENSG00000134046|ENSG00000107185|ENSG00000140443…
cellular localization	Gene Ontology	GO:0051641	48	2405	6.01884e-06	0.000446123	ENSG00000107175|ENSG00000233927|ENSG00000197226|ENSG00000157107|ENSG00000185920|ENSG00000164654|ENSG00000171596|ENSG00000113163|ENSG00000142655|ENSG00000163558|ENSG00000137642|ENSG00000054523|ENSG00000115268|ENSG00000091831|ENSG00000204764|ENSG00000143158|ENSG00000127445|ENSG00000169220|ENSG00000154127|ENSG00000115266|ENSG00000070366|ENSG00000140463|ENSG00000148950|ENSG00000161202|ENSG00000161203…
phosphorylation	Gene Ontology	GO:0016310	45	2194	6.30266e-06	0.000460188	ENSG00000101126|ENSG00000130766|ENSG00000109911|ENSG00000164919|ENSG00000065534|ENSG00000113163|ENSG00000165671|ENSG00000163558|ENSG00000163888|ENSG00000137642|ENSG00000211455|ENSG00000179335|ENSG00000161021|ENSG00000091831|ENSG00000198648|ENSG00000127445|ENSG00000169220|ENSG00000023228|ENSG00000154127|ENSG00000106070|ENSG00000140443|ENSG00000161202|ENSG00000141753|ENSG00000136244|ENSG00000127914…
catalytic activity	Gene Ontology	GO:0003824	88	5594	7.48524e-06	0.000538497	ENSG00000115421|ENSG00000122254|ENSG00000163558|ENSG00000095587|ENSG00000164220|ENSG00000115896|ENSG00000154127|ENSG00000004700|ENSG00000143199|ENSG00000122008|ENSG00000161204|ENSG00000107140|ENSG00000163162|ENSG00000124212|ENSG00000158560|ENSG00000115286|ENSG00000101224|ENSG00000132437|ENSG00000132436|ENSG00000139144|ENSG00000152382|ENSG00000175874|ENSG00000196365|ENSG00000276023|ENSG00000131459…
negative regulation of molecular function	Gene Ontology	GO:0044092	28	1075	7.67554e-06	0.000544185	ENSG00000107175|ENSG00000101126|ENSG00000185920|ENSG00000084234|ENSG00000142655|ENSG00000163888|ENSG00000137642|ENSG00000073614|ENSG00000147883|ENSG00000091831|ENSG00000198648|ENSG00000127445|ENSG00000169220|ENSG00000147889|ENSG00000143155|ENSG00000154127|ENSG00000140443|ENSG00000140463|ENSG00000136244|ENSG00000124212|ENSG00000122188|ENSG00000145703|ENSG00000145708|ENSG00000153201|ENSG00000058668…
negative regulation of phosphorylation	Gene Ontology	GO:0042326	16	419	1.01225e-05	0.000689189	ENSG00000147883|ENSG00000153201|ENSG00000198648|ENSG00000127445|ENSG00000169220|ENSG00000147889|ENSG00000154127|ENSG00000106070|ENSG00000276023|ENSG00000122188|ENSG00000140443|ENSG00000163162|ENSG00000071051|ENSG00000163888|ENSG00000137642|ENSG00000136244
organic substance transport	Gene Ontology	GO:0071702	50	2601	1.02152e-05	0.000689189	ENSG00000107175|ENSG00000233927|ENSG00000130766|ENSG00000197226|ENSG00000185920|ENSG00000120451|ENSG00000174448|ENSG00000171596|ENSG00000113163|ENSG00000142655|ENSG00000163558|ENSG00000137642|ENSG00000176783|ENSG00000115268|ENSG00000091831|ENSG00000204764|ENSG00000143158|ENSG00000198722|ENSG00000115266|ENSG00000070366|ENSG00000145708|ENSG00000106070|ENSG00000140463|ENSG00000148950|ENSG00000161203…
intracellular non-membrane-bounded organelle	Gene Ontology	GO:0043232	66	3829	1.02843e-05	0.000689189	ENSG00000144535|ENSG00000233927|ENSG00000065534|ENSG00000147889|ENSG00000145703|ENSG00000160049|ENSG00000185920|ENSG00000163092|ENSG00000165671|ENSG00000142655|ENSG00000163558|ENSG00000136715|ENSG00000163888|ENSG00000125817|ENSG00000164309|ENSG00000054523|ENSG00000179335|ENSG00000115268|ENSG00000091831|ENSG00000145708|ENSG00000198648|ENSG00000004700|ENSG00000169220|ENSG00000211455|ENSG00000115266…
non-membrane-bounded organelle	Gene Ontology	GO:0043228	66	3829	1.02843e-05	0.000689189	ENSG00000144535|ENSG00000233927|ENSG00000065534|ENSG00000147889|ENSG00000145703|ENSG00000160049|ENSG00000185920|ENSG00000163092|ENSG00000165671|ENSG00000142655|ENSG00000163558|ENSG00000136715|ENSG00000163888|ENSG00000125817|ENSG00000164309|ENSG00000054523|ENSG00000179335|ENSG00000115268|ENSG00000091831|ENSG00000145708|ENSG00000198648|ENSG00000004700|ENSG00000169220|ENSG00000211455|ENSG00000115266…
cellular biosynthetic process	Gene Ontology	GO:0044249	91	5905	1.11141e-05	0.000734735	ENSG00000107175|ENSG00000233927|ENSG00000185920|ENSG00000163558|ENSG00000235194|ENSG00000091831|ENSG00000106070|ENSG00000204120|ENSG00000161202|ENSG00000122008|ENSG00000124212|ENSG00000253293|ENSG00000164532|ENSG00000163273|ENSG00000215271|ENSG00000004864|ENSG00000132437|ENSG00000139144|ENSG00000152382|ENSG00000196365|ENSG00000143164|ENSG00000131459|ENSG00000170946|ENSG00000050748|ENSG00000135945…
protein localization	Gene Ontology	GO:0008104	47	2394	1.17144e-05	0.000764092	ENSG00000107175|ENSG00000233927|ENSG00000197226|ENSG00000185920|ENSG00000120451|ENSG00000164654|ENSG00000171596|ENSG00000142655|ENSG00000163558|ENSG00000137642|ENSG00000151208|ENSG00000157107|ENSG00000176783|ENSG00000115268|ENSG00000091831|ENSG00000204764|ENSG00000143158|ENSG00000127445|ENSG00000115266|ENSG00000140463|ENSG00000148950|ENSG00000161202|ENSG00000131746|ENSG00000136244|ENSG00000204634…
negative regulation of response to stimulus	Gene Ontology	GO:0048585	32	1357	1.20032e-05	0.000772629	ENSG00000107175|ENSG00000130766|ENSG00000185920|ENSG00000137642|ENSG00000106070|ENSG00000178175|ENSG00000091831|ENSG00000127445|ENSG00000169220|ENSG00000141753|ENSG00000154127|ENSG00000115266|ENSG00000140443|ENSG00000140463|ENSG00000155011|ENSG00000164532|ENSG00000161202|ENSG00000161203|ENSG00000107731|ENSG00000163162|ENSG00000124212|ENSG00000122188|ENSG00000196781|ENSG00000106443|ENSG00000145708…
negative regulation of phosphate metabolic process	Gene Ontology	GO:0045936	18	536	1.52285e-05	0.000955102	ENSG00000147883|ENSG00000153201|ENSG00000198648|ENSG00000127445|ENSG00000169220|ENSG00000147889|ENSG00000143155|ENSG00000154127|ENSG00000099864|ENSG00000276023|ENSG00000122188|ENSG00000140443|ENSG00000163162|ENSG00000071051|ENSG00000163888|ENSG00000137642|ENSG00000106070|ENSG00000136244
negative regulation of phosphorus metabolic process	Gene Ontology	GO:0010563	18	536	1.52285e-05	0.000955102	ENSG00000147883|ENSG00000153201|ENSG00000198648|ENSG00000127445|ENSG00000169220|ENSG00000147889|ENSG00000143155|ENSG00000154127|ENSG00000099864|ENSG00000276023|ENSG00000122188|ENSG00000140443|ENSG00000163162|ENSG00000071051|ENSG00000163888|ENSG00000137642|ENSG00000106070|ENSG00000136244
macromolecule modification	Gene Ontology	GO:0043412	66	3878	1.55048e-05	0.000960119	ENSG00000103404|ENSG00000186231|ENSG00000109911|ENSG00000101126|ENSG00000130766|ENSG00000166348|ENSG00000188215|ENSG00000214160|ENSG00000000419|ENSG00000065534|ENSG00000113163|ENSG00000165671|ENSG00000136731|ENSG00000163558|ENSG00000136715|ENSG00000163888|ENSG00000137642|ENSG00000211455|ENSG00000073614|ENSG00000235194|ENSG00000141429|ENSG00000179335|ENSG00000161021|ENSG00000091831|ENSG00000198648…
regulation of phosphorylation	Gene Ontology	GO:0042325	32	1376	1.57241e-05	0.000961528	ENSG00000101126|ENSG00000130766|ENSG00000165671|ENSG00000163888|ENSG00000137642|ENSG00000147883|ENSG00000091831|ENSG00000198648|ENSG00000127445|ENSG00000169220|ENSG00000147889|ENSG00000154127|ENSG00000106070|ENSG00000140443|ENSG00000161202|ENSG00000136244|ENSG00000127914|ENSG00000109911|ENSG00000163162|ENSG00000122188|ENSG00000101224|ENSG00000088888|ENSG00000181104|ENSG00000115896|ENSG00000153201…
nuclear part	Gene Ontology	GO:0044428	66	3886	1.6562e-05	0.000987243	ENSG00000115421|ENSG00000144535|ENSG00000233927|ENSG00000160049|ENSG00000107175|ENSG00000105671|ENSG00000100813|ENSG00000197081|ENSG00000164654|ENSG00000113163|ENSG00000165671|ENSG00000142655|ENSG00000136715|ENSG00000183431|ENSG00000137642|ENSG00000073614|ENSG00000071626|ENSG00000179335|ENSG00000161021|ENSG00000091831|ENSG00000204764|ENSG00000144231|ENSG00000127445|ENSG00000169220|ENSG00000141425…
intracellular organelle lumen	Gene Ontology	GO:0070013	72	4372	1.68204e-05	0.000987243	ENSG00000115421|ENSG00000144535|ENSG00000233927|ENSG00000160049|ENSG00000107175|ENSG00000105671|ENSG00000010932|ENSG00000142655|ENSG00000197081|ENSG00000164654|ENSG00000125779|ENSG00000113163|ENSG00000165671|ENSG00000136731|ENSG00000136715|ENSG00000183431|ENSG00000137642|ENSG00000073614|ENSG00000071626|ENSG00000179335|ENSG00000161021|ENSG00000091831|ENSG00000144231|ENSG00000127445|ENSG00000169220…
membrane-enclosed lumen	Gene Ontology	GO:0031974	72	4373	1.69518e-05	0.000987243	ENSG00000115421|ENSG00000144535|ENSG00000233927|ENSG00000160049|ENSG00000107175|ENSG00000105671|ENSG00000010932|ENSG00000142655|ENSG00000197081|ENSG00000164654|ENSG00000125779|ENSG00000113163|ENSG00000165671|ENSG00000136731|ENSG00000136715|ENSG00000183431|ENSG00000137642|ENSG00000073614|ENSG00000071626|ENSG00000179335|ENSG00000161021|ENSG00000091831|ENSG00000144231|ENSG00000127445|ENSG00000169220…
organelle lumen	Gene Ontology	GO:0043233	72	4373	1.69518e-05	0.000987243	ENSG00000115421|ENSG00000144535|ENSG00000233927|ENSG00000160049|ENSG00000107175|ENSG00000105671|ENSG00000010932|ENSG00000142655|ENSG00000197081|ENSG00000164654|ENSG00000125779|ENSG00000113163|ENSG00000165671|ENSG00000136731|ENSG00000136715|ENSG00000183431|ENSG00000137642|ENSG00000073614|ENSG00000071626|ENSG00000179335|ENSG00000161021|ENSG00000091831|ENSG00000144231|ENSG00000127445|ENSG00000169220…
cytoskeletal protein binding	Gene Ontology	GO:0008092	23	823	1.8e-05	0.00103024	ENSG00000065534|ENSG00000157827|ENSG00000163092|ENSG00000142655|ENSG00000211455|ENSG00000054523|ENSG00000151208|ENSG00000169220|ENSG00000115266|ENSG00000140463|ENSG00000137076|ENSG00000131746|ENSG00000171530|ENSG00000158560|ENSG00000183386|ENSG00000006747|ENSG00000145703|ENSG00000112186|ENSG00000169994|ENSG00000101126|ENSG00000198771|ENSG00000198467|ENSG00000071051
negative regulation of neuron death	Gene Ontology	GO:1901215	10	173	1.81113e-05	0.00103024	ENSG00000137642|ENSG00000091831|ENSG00000127445|ENSG00000101126|ENSG00000162924|ENSG00000163558|ENSG00000107731|ENSG00000136244|ENSG00000172216|ENSG00000181104
organic cyclic compound binding	Gene Ontology	GO:0097159	89	5812	1.91075e-05	0.00107441	ENSG00000115421|ENSG00000107175|ENSG00000233927|ENSG00000105671|ENSG00000185920|ENSG00000163558|ENSG00000175414|ENSG00000091831|ENSG00000183431|ENSG00000004700|ENSG00000204120|ENSG00000122008|ENSG00000171530|ENSG00000161204|ENSG00000107140|ENSG00000132622|ENSG00000124212|ENSG00000253293|ENSG00000164532|ENSG00000215271|ENSG00000132436|ENSG00000139144|ENSG00000175874|ENSG00000196365|ENSG00000276023…
negative regulation of cellular metabolic process	Gene Ontology	GO:0031324	45	2297	1.96211e-05	0.00109075	ENSG00000198914|ENSG00000160049|ENSG00000185920|ENSG00000100813|ENSG00000084234|ENSG00000165671|ENSG00000142655|ENSG00000136715|ENSG00000163888|ENSG00000137642|ENSG00000073614|ENSG00000178175|ENSG00000091831|ENSG00000198648|ENSG00000127445|ENSG00000169220|ENSG00000147889|ENSG00000143155|ENSG00000154127|ENSG00000162924|ENSG00000070366|ENSG00000134046|ENSG00000122188|ENSG00000140443|ENSG00000204120…
heterocyclic compound binding	Gene Ontology	GO:1901363	88	5732	1.98582e-05	0.00109153	ENSG00000115421|ENSG00000107175|ENSG00000233927|ENSG00000105671|ENSG00000163558|ENSG00000175414|ENSG00000091831|ENSG00000183431|ENSG00000004700|ENSG00000204120|ENSG00000122008|ENSG00000171530|ENSG00000161204|ENSG00000107140|ENSG00000132622|ENSG00000124212|ENSG00000253293|ENSG00000164532|ENSG00000215271|ENSG00000132436|ENSG00000139144|ENSG00000175874|ENSG00000196365|ENSG00000276023|ENSG00000050748…
establishment of localization in cell	Gene Ontology	GO:0051649	40	1945	2.11014e-05	0.00113875	ENSG00000107175|ENSG00000233927|ENSG00000197226|ENSG00000185920|ENSG00000171596|ENSG00000113163|ENSG00000142655|ENSG00000163558|ENSG00000137642|ENSG00000054523|ENSG00000115268|ENSG00000204764|ENSG00000143158|ENSG00000198722|ENSG00000169220|ENSG00000154127|ENSG00000115266|ENSG00000070366|ENSG00000140463|ENSG00000148950|ENSG00000161203|ENSG00000136244|ENSG00000204634|ENSG00000158560|ENSG00000107185…
macromolecule localization	Gene Ontology	GO:0033036	51	2749	2.11828e-05	0.00113875	ENSG00000107175|ENSG00000233927|ENSG00000197226|ENSG00000185920|ENSG00000120451|ENSG00000164654|ENSG00000171596|ENSG00000113163|ENSG00000142655|ENSG00000163558|ENSG00000137642|ENSG00000151208|ENSG00000157107|ENSG00000176783|ENSG00000115268|ENSG00000091831|ENSG00000204764|ENSG00000143158|ENSG00000127445|ENSG00000115266|ENSG00000070366|ENSG00000140463|ENSG00000148950|ENSG00000161202|ENSG00000131746…
nuclear lumen	Gene Ontology	GO:0031981	61	3523	2.18787e-05	0.00116338	ENSG00000115421|ENSG00000144535|ENSG00000233927|ENSG00000160049|ENSG00000107175|ENSG00000105671|ENSG00000100813|ENSG00000164654|ENSG00000113163|ENSG00000165671|ENSG00000142655|ENSG00000136715|ENSG00000073614|ENSG00000071626|ENSG00000179335|ENSG00000161021|ENSG00000091831|ENSG00000144231|ENSG00000127445|ENSG00000169220|ENSG00000141425|ENSG00000070366|ENSG00000134046|ENSG00000004700|ENSG00000135972…
RNA metabolic process	Gene Ontology	GO:0016070	73	4503	2.45063e-05	0.00128908	ENSG00000115421|ENSG00000144535|ENSG00000233927|ENSG00000152382|ENSG00000198914|ENSG00000107175|ENSG00000105671|ENSG00000185920|ENSG00000171540|ENSG00000165671|ENSG00000142655|ENSG00000163558|ENSG00000136715|ENSG00000073614|ENSG00000006468|ENSG00000114933|ENSG00000071626|ENSG00000179335|ENSG00000161021|ENSG00000091831|ENSG00000144231|ENSG00000127445|ENSG00000169220|ENSG00000147889|ENSG00000141425…
negative regulation of biological process	Gene Ontology	GO:0048519	73	4509	2.56366e-05	0.0013342	ENSG00000144535|ENSG00000107175|ENSG00000058668|ENSG00000188215|ENSG00000198914|ENSG00000160049|ENSG00000072163|ENSG00000185920|ENSG00000100813|ENSG00000084234|ENSG00000165671|ENSG00000142655|ENSG00000163558|ENSG00000136715|ENSG00000163888|ENSG00000137642|ENSG00000106070|ENSG00000073614|ENSG00000095587|ENSG00000130766|ENSG00000178175|ENSG00000091831|ENSG00000198648|ENSG00000127445|ENSG00000169220…
negative regulation of cellular process	Gene Ontology	GO:0048523	69	4186	2.64038e-05	0.00135965	ENSG00000144535|ENSG00000107175|ENSG00000058668|ENSG00000188215|ENSG00000198914|ENSG00000160049|ENSG00000072163|ENSG00000185920|ENSG00000100813|ENSG00000084234|ENSG00000165671|ENSG00000142655|ENSG00000163558|ENSG00000136715|ENSG00000163888|ENSG00000137642|ENSG00000106070|ENSG00000073614|ENSG00000130766|ENSG00000178175|ENSG00000091831|ENSG00000198648|ENSG00000127445|ENSG00000169220|ENSG00000147889…
regulation of protein phosphorylation	Gene Ontology	GO:0001932	30	1284	2.72012e-05	0.00138613	ENSG00000101126|ENSG00000130766|ENSG00000165671|ENSG00000163888|ENSG00000137642|ENSG00000147883|ENSG00000091831|ENSG00000198648|ENSG00000127445|ENSG00000169220|ENSG00000147889|ENSG00000154127|ENSG00000140443|ENSG00000161202|ENSG00000136244|ENSG00000127914|ENSG00000109911|ENSG00000163162|ENSG00000122188|ENSG00000101224|ENSG00000088888|ENSG00000181104|ENSG00000115896|ENSG00000161011|ENSG00000058668…
heterocycle biosynthetic process	Gene Ontology	GO:0018130	70	4287	3.06836e-05	0.00153374	ENSG00000092067|ENSG00000107175|ENSG00000233927|ENSG00000152382|ENSG00000198914|ENSG00000185920|ENSG00000142655|ENSG00000171540|ENSG00000124212|ENSG00000165671|ENSG00000112186|ENSG00000163558|ENSG00000136715|ENSG00000073614|ENSG00000006468|ENSG00000114933|ENSG00000161021|ENSG00000091831|ENSG00000144231|ENSG00000127445|ENSG00000169220|ENSG00000147889|ENSG00000141425|ENSG00000070366|ENSG00000134046…
intracellular transport	Gene Ontology	GO:0046907	34	1560	3.07249e-05	0.00153374	ENSG00000107175|ENSG00000233927|ENSG00000197226|ENSG00000185920|ENSG00000171596|ENSG00000113163|ENSG00000142655|ENSG00000163558|ENSG00000137642|ENSG00000054523|ENSG00000115268|ENSG00000204764|ENSG00000144231|ENSG00000169220|ENSG00000115266|ENSG00000070366|ENSG00000140463|ENSG00000148950|ENSG00000161203|ENSG00000136244|ENSG00000204634|ENSG00000158560|ENSG00000107185|ENSG00000124789|ENSG00000088888…
protein phosphorylation	Gene Ontology	GO:0006468	38	1838	3.11788e-05	0.00154067	ENSG00000101126|ENSG00000130766|ENSG00000109911|ENSG00000065534|ENSG00000113163|ENSG00000165671|ENSG00000163558|ENSG00000163888|ENSG00000137642|ENSG00000211455|ENSG00000179335|ENSG00000161021|ENSG00000091831|ENSG00000198648|ENSG00000127445|ENSG00000169220|ENSG00000147889|ENSG00000154127|ENSG00000140443|ENSG00000161202|ENSG00000136244|ENSG00000127914|ENSG00000107140|ENSG00000163162|ENSG00000122188…
single-organism metabolic process	Gene Ontology	GO:0044710	66	3970	3.25297e-05	0.00159135	ENSG00000214160|ENSG00000058668|ENSG00000130766|ENSG00000164919|ENSG00000010932|ENSG00000000419|ENSG00000163162|ENSG00000142657|ENSG00000136731|ENSG00000137642|ENSG00000106070|ENSG00000073614|ENSG00000235194|ENSG00000141429|ENSG00000091831|ENSG00000143158|ENSG00000127445|ENSG00000169220|ENSG00000023228|ENSG00000099864|ENSG00000115896|ENSG00000134046|ENSG00000140443|ENSG00000143199|ENSG00000140463…
aromatic compound biosynthetic process	Gene Ontology	GO:0019438	70	4300	3.38586e-05	0.00163996	ENSG00000092067|ENSG00000107175|ENSG00000233927|ENSG00000152382|ENSG00000198914|ENSG00000185920|ENSG00000142655|ENSG00000171540|ENSG00000124212|ENSG00000165671|ENSG00000112186|ENSG00000163558|ENSG00000136715|ENSG00000073614|ENSG00000006468|ENSG00000114933|ENSG00000161021|ENSG00000091831|ENSG00000144231|ENSG00000127445|ENSG00000169220|ENSG00000147889|ENSG00000141425|ENSG00000070366|ENSG00000134046…
nucleobase-containing compound biosynthetic process	Gene Ontology	GO:0034654	69	4234	3.81168e-05	0.00182811	ENSG00000092067|ENSG00000107175|ENSG00000233927|ENSG00000152382|ENSG00000198914|ENSG00000185920|ENSG00000142655|ENSG00000171540|ENSG00000124212|ENSG00000165671|ENSG00000112186|ENSG00000163558|ENSG00000136715|ENSG00000073614|ENSG00000006468|ENSG00000114933|ENSG00000161021|ENSG00000091831|ENSG00000144231|ENSG00000127445|ENSG00000169220|ENSG00000147889|ENSG00000141425|ENSG00000070366|ENSG00000134046…
cellular protein metabolic process	Gene Ontology	GO:0044267	75	4738	4.08324e-05	0.00193934	ENSG00000103404|ENSG00000186231|ENSG00000233927|ENSG00000152382|ENSG00000130766|ENSG00000166348|ENSG00000188215|ENSG00000214160|ENSG00000000419|ENSG00000065534|ENSG00000113163|ENSG00000165671|ENSG00000136731|ENSG00000163558|ENSG00000136715|ENSG00000163888|ENSG00000137642|ENSG00000211455|ENSG00000073614|ENSG00000235194|ENSG00000107140|ENSG00000141429|ENSG00000179335|ENSG00000161021|ENSG00000091831…
macromolecule biosynthetic process	Gene Ontology	GO:0009059	78	5001	4.44695e-05	0.00209177	ENSG00000092067|ENSG00000107175|ENSG00000233927|ENSG00000152382|ENSG00000198914|ENSG00000109911|ENSG00000122254|ENSG00000185920|ENSG00000142655|ENSG00000171540|ENSG00000214160|ENSG00000107447|ENSG00000000419|ENSG00000165671|ENSG00000136731|ENSG00000163558|ENSG00000136715|ENSG00000106070|ENSG00000073614|ENSG00000006468|ENSG00000114933|ENSG00000141429|ENSG00000161021|ENSG00000091831|ENSG00000144231…
regulation of catalytic activity	Gene Ontology	GO:0050790	44	2311	4.81401e-05	0.00224287	ENSG00000107175|ENSG00000101126|ENSG00000130766|ENSG00000188215|ENSG00000084234|ENSG00000163888|ENSG00000137642|ENSG00000073614|ENSG00000147883|ENSG00000091831|ENSG00000127445|ENSG00000169220|ENSG00000147889|ENSG00000197226|ENSG00000154127|ENSG00000171596|ENSG00000107185|ENSG00000140443|ENSG00000140463|ENSG00000161202|ENSG00000213316|ENSG00000204634|ENSG00000127914|ENSG00000146090|ENSG00000109911…
insulin-like growth factor receptor signaling pathway	Gene Ontology	GO:0048009	5	35	4.97425e-05	0.00229566	ENSG00000141753|ENSG00000140443|ENSG00000204120|ENSG00000197081|ENSG00000106070
regulation of nitrogen compound metabolic process	Gene Ontology	GO:0051171	69	4279	5.33178e-05	0.00243767	ENSG00000092067|ENSG00000107175|ENSG00000152382|ENSG00000198914|ENSG00000160049|ENSG00000109911|ENSG00000185920|ENSG00000171540|ENSG00000100813|ENSG00000124212|ENSG00000165671|ENSG00000142655|ENSG00000163558|ENSG00000136715|ENSG00000137642|ENSG00000073614|ENSG00000006468|ENSG00000114933|ENSG00000071626|ENSG00000179335|ENSG00000161021|ENSG00000091831|ENSG00000144231|ENSG00000127445|ENSG00000169220…
protein modification process	Gene Ontology	GO:0036211	62	3715	5.48553e-05	0.00244038	ENSG00000103404|ENSG00000186231|ENSG00000109911|ENSG00000101126|ENSG00000130766|ENSG00000166348|ENSG00000188215|ENSG00000214160|ENSG00000000419|ENSG00000065534|ENSG00000113163|ENSG00000165671|ENSG00000136731|ENSG00000163558|ENSG00000136715|ENSG00000163888|ENSG00000137642|ENSG00000211455|ENSG00000073614|ENSG00000235194|ENSG00000141429|ENSG00000179335|ENSG00000161021|ENSG00000091831|ENSG00000198648…
cellular protein modification process	Gene Ontology	GO:0006464	62	3715	5.48553e-05	0.00244038	ENSG00000103404|ENSG00000186231|ENSG00000109911|ENSG00000101126|ENSG00000130766|ENSG00000166348|ENSG00000188215|ENSG00000214160|ENSG00000000419|ENSG00000065534|ENSG00000113163|ENSG00000165671|ENSG00000136731|ENSG00000163558|ENSG00000136715|ENSG00000163888|ENSG00000137642|ENSG00000211455|ENSG00000073614|ENSG00000235194|ENSG00000141429|ENSG00000179335|ENSG00000161021|ENSG00000091831|ENSG00000198648…
N,N-dimethylaniline monooxygenase activity	Gene Ontology	GO:0004499	3	5	5.48737e-05	0.00244038	ENSG00000010932|ENSG00000094963|ENSG00000076258
protein metabolic process	Gene Ontology	GO:0019538	80	5204	5.62053e-05	0.00247708	ENSG00000092067|ENSG00000186231|ENSG00000233927|ENSG00000152382|ENSG00000130766|ENSG00000166348|ENSG00000188215|ENSG00000185920|ENSG00000214160|ENSG00000141425|ENSG00000000419|ENSG00000065534|ENSG00000113163|ENSG00000165671|ENSG00000136731|ENSG00000163558|ENSG00000136715|ENSG00000163888|ENSG00000137642|ENSG00000211455|ENSG00000073614|ENSG00000095587|ENSG00000107140|ENSG00000141429|ENSG00000179335…
gene expression	Gene Ontology	GO:0010467	80	5206	5.69675e-05	0.00248826	ENSG00000115421|ENSG00000144535|ENSG00000233927|ENSG00000152382|ENSG00000198914|ENSG00000107175|ENSG00000105671|ENSG00000185920|ENSG00000171540|ENSG00000100813|ENSG00000135960|ENSG00000165671|ENSG00000142655|ENSG00000163558|ENSG00000136715|ENSG00000137642|ENSG00000073614|ENSG00000006468|ENSG00000114933|ENSG00000071626|ENSG00000179335|ENSG00000161021|ENSG00000091831|ENSG00000144231|ENSG00000127445…
negative regulation of protein phosphorylation	Gene Ontology	GO:0001933	14	384	5.88993e-05	0.00254987	ENSG00000147883|ENSG00000198648|ENSG00000127445|ENSG00000169220|ENSG00000147889|ENSG00000154127|ENSG00000276023|ENSG00000122188|ENSG00000140443|ENSG00000163162|ENSG00000071051|ENSG00000163888|ENSG00000137642|ENSG00000136244
regulation of signaling	Gene Ontology	GO:0023051	53	3024	6.41918e-05	0.00275462	ENSG00000107175|ENSG00000058668|ENSG00000130766|ENSG00000072163|ENSG00000185920|ENSG00000164654|ENSG00000137642|ENSG00000095585|ENSG00000178175|ENSG00000091831|ENSG00000143158|ENSG00000127445|ENSG00000169220|ENSG00000141753|ENSG00000154127|ENSG00000115266|ENSG00000145708|ENSG00000134046|ENSG00000140443|ENSG00000155011|ENSG00000164532|ENSG00000161202|ENSG00000161203|ENSG00000136244|ENSG00000107731…
cellular response to stress	Gene Ontology	GO:0033554	37	1836	6.77558e-05	0.00288227	ENSG00000107175|ENSG00000065534|ENSG00000130766|ENSG00000100813|ENSG00000164654|ENSG00000113163|ENSG00000114933|ENSG00000198648|ENSG00000169220|ENSG00000147889|ENSG00000143155|ENSG00000135960|ENSG00000004700|ENSG00000140443|ENSG00000204120|ENSG00000135972|ENSG00000161202|ENSG00000122008|ENSG00000136244|ENSG00000172216|ENSG00000124212|ENSG00000137076|ENSG00000124789|ENSG00000145708|ENSG00000144231…
regulation of nucleobase-containing compound metabolic process	Gene Ontology	GO:0019219	65	3987	6.89511e-05	0.00290783	ENSG00000092067|ENSG00000107175|ENSG00000152382|ENSG00000198914|ENSG00000160049|ENSG00000185920|ENSG00000171540|ENSG00000124212|ENSG00000165671|ENSG00000142655|ENSG00000163558|ENSG00000136715|ENSG00000073614|ENSG00000006468|ENSG00000114933|ENSG00000071626|ENSG00000179335|ENSG00000161021|ENSG00000091831|ENSG00000144231|ENSG00000127445|ENSG00000169220|ENSG00000147889|ENSG00000141425|ENSG00000070366…
organic cyclic compound biosynthetic process	Gene Ontology	GO:1901362	70	4402	7.16189e-05	0.00299453	ENSG00000092067|ENSG00000107175|ENSG00000233927|ENSG00000152382|ENSG00000198914|ENSG00000185920|ENSG00000142655|ENSG00000171540|ENSG00000124212|ENSG00000165671|ENSG00000112186|ENSG00000163558|ENSG00000136715|ENSG00000073614|ENSG00000006468|ENSG00000114933|ENSG00000161021|ENSG00000091831|ENSG00000144231|ENSG00000127445|ENSG00000169220|ENSG00000147889|ENSG00000141425|ENSG00000070366|ENSG00000134046…
negative regulation of kinase activity	Gene Ontology	GO:0033673	11	251	7.83181e-05	0.00324688	ENSG00000147883|ENSG00000153201|ENSG00000169220|ENSG00000147889|ENSG00000154127|ENSG00000276023|ENSG00000122188|ENSG00000140443|ENSG00000163888|ENSG00000137642|ENSG00000136244
regulation of cell communication	Gene Ontology	GO:0010646	52	2972	7.99152e-05	0.00328525	ENSG00000107175|ENSG00000058668|ENSG00000130766|ENSG00000072163|ENSG00000185920|ENSG00000164654|ENSG00000137642|ENSG00000095585|ENSG00000178175|ENSG00000091831|ENSG00000143158|ENSG00000127445|ENSG00000169220|ENSG00000141753|ENSG00000154127|ENSG00000115266|ENSG00000145708|ENSG00000134046|ENSG00000140443|ENSG00000155011|ENSG00000164532|ENSG00000161202|ENSG00000161203|ENSG00000136244|ENSG00000107731…
cellular macromolecule biosynthetic process	Gene Ontology	GO:0034645	75	4840	8.31131e-05	0.00338824	ENSG00000092067|ENSG00000107175|ENSG00000233927|ENSG00000152382|ENSG00000198914|ENSG00000109911|ENSG00000185920|ENSG00000142655|ENSG00000171540|ENSG00000214160|ENSG00000107447|ENSG00000000419|ENSG00000165671|ENSG00000136731|ENSG00000163558|ENSG00000136715|ENSG00000106070|ENSG00000073614|ENSG00000006468|ENSG00000114933|ENSG00000141429|ENSG00000161021|ENSG00000091831|ENSG00000144231|ENSG00000127445…
intracellular signal transduction	Gene Ontology	GO:0035556	47	2615	0.000101624	0.00408202	ENSG00000107175|ENSG00000130766|ENSG00000164654|ENSG00000163558|ENSG00000137642|ENSG00000211455|ENSG00000175414|ENSG00000169228|ENSG00000091831|ENSG00000198648|ENSG00000127445|ENSG00000169220|ENSG00000147889|ENSG00000171596|ENSG00000095585|ENSG00000140443|ENSG00000143199|ENSG00000161202|ENSG00000136244|ENSG00000172216|ENSG00000127914|ENSG00000146090|ENSG00000163162|ENSG00000122188|ENSG00000115602…
negative regulation of protein modification process	Gene Ontology	GO:0031400	17	567	0.0001018	0.00408202	ENSG00000147883|ENSG00000198648|ENSG00000127445|ENSG00000169220|ENSG00000147889|ENSG00000058668|ENSG00000154127|ENSG00000276023|ENSG00000122188|ENSG00000140443|ENSG00000163162|ENSG00000136244|ENSG00000071051|ENSG00000143155|ENSG00000163888|ENSG00000137642|ENSG00000073614
protein targeting	Gene Ontology	GO:0006605	19	686	0.000109938	0.00437249	ENSG00000107175|ENSG00000233927|ENSG00000115268|ENSG00000204764|ENSG00000153201|ENSG00000185920|ENSG00000142655|ENSG00000115266|ENSG00000171596|ENSG00000099864|ENSG00000135960|ENSG00000148950|ENSG00000163558|ENSG00000136244|ENSG00000137642|ENSG00000050748|ENSG00000088888|ENSG00000162928|ENSG00000181104
cellular nitrogen compound biosynthetic process	Gene Ontology	GO:0044271	74	4808	0.000117965	0.0046539	ENSG00000092067|ENSG00000107175|ENSG00000233927|ENSG00000152382|ENSG00000198914|ENSG00000109911|ENSG00000185920|ENSG00000142655|ENSG00000171540|ENSG00000107447|ENSG00000124212|ENSG00000165671|ENSG00000112186|ENSG00000163558|ENSG00000136715|ENSG00000073614|ENSG00000006468|ENSG00000114933|ENSG00000161021|ENSG00000091831|ENSG00000144231|ENSG00000127445|ENSG00000169220|ENSG00000147889|ENSG00000141425…
protein transport	Gene Ontology	GO:0015031	36	1824	0.000128991	0.00501904	ENSG00000107175|ENSG00000233927|ENSG00000197226|ENSG00000185920|ENSG00000120451|ENSG00000171596|ENSG00000142655|ENSG00000163558|ENSG00000137642|ENSG00000176783|ENSG00000115268|ENSG00000204764|ENSG00000143158|ENSG00000115266|ENSG00000140463|ENSG00000148950|ENSG00000161203|ENSG00000136244|ENSG00000204634|ENSG00000169228|ENSG00000122188|ENSG00000111711|ENSG00000124789|ENSG00000213064|ENSG00000127022…
cytosol	Gene Ontology	GO:0005829	57	3425	0.000129272	0.00501904	ENSG00000107175|ENSG00000233927|ENSG00000065534|ENSG00000130766|ENSG00000160049|ENSG00000072163|ENSG00000157827|ENSG00000100813|ENSG00000142657|ENSG00000163558|ENSG00000163888|ENSG00000095585|ENSG00000107140|ENSG00000147883|ENSG00000127445|ENSG00000147889|ENSG00000127022|ENSG00000070366|ENSG00000158417|ENSG00000106070|ENSG00000143199|ENSG00000140463|ENSG00000161202|ENSG00000169764|ENSG00000127914…
nucleoplasm	Gene Ontology	GO:0005654	51	2958	0.00013662	0.00526255	ENSG00000115421|ENSG00000092067|ENSG00000233927|ENSG00000160049|ENSG00000107175|ENSG00000105671|ENSG00000100813|ENSG00000164654|ENSG00000113163|ENSG00000165671|ENSG00000136715|ENSG00000073614|ENSG00000071626|ENSG00000179335|ENSG00000161021|ENSG00000091831|ENSG00000144231|ENSG00000127445|ENSG00000169220|ENSG00000141425|ENSG00000134046|ENSG00000004700|ENSG00000122008|ENSG00000172216|ENSG00000157259…
oxidation-reduction process	Gene Ontology	GO:0055114	23	945	0.000138701	0.00530099	ENSG00000130766|ENSG00000164919|ENSG00000010932|ENSG00000142657|ENSG00000073614|ENSG00000235194|ENSG00000023228|ENSG00000106070|ENSG00000169764|ENSG00000125779|ENSG00000124212|ENSG00000167733|ENSG00000115286|ENSG00000111713|ENSG00000004864|ENSG00000175874|ENSG00000094963|ENSG00000076258|ENSG00000146066|ENSG00000121350|ENSG00000170946|ENSG00000131459|ENSG00000162928
small molecule binding	Gene Ontology	GO:0036094	45	2500	0.000141798	0.00537732	ENSG00000115421|ENSG00000065534|ENSG00000105671|ENSG00000185920|ENSG00000197081|ENSG00000100813|ENSG00000000419|ENSG00000163558|ENSG00000211455|ENSG00000175414|ENSG00000054523|ENSG00000169228|ENSG00000071626|ENSG00000179335|ENSG00000204764|ENSG00000198648|ENSG00000134046|ENSG00000004700|ENSG00000140443|ENSG00000143199|ENSG00000182580|ENSG00000010932|ENSG00000169764|ENSG00000161204|ENSG00000005187…
single-organism intracellular transport	Gene Ontology	GO:1902582	19	701	0.00014412	0.00542335	ENSG00000107175|ENSG00000233927|ENSG00000115268|ENSG00000204764|ENSG00000153201|ENSG00000158560|ENSG00000185920|ENSG00000115266|ENSG00000099864|ENSG00000135960|ENSG00000113163|ENSG00000124789|ENSG00000142655|ENSG00000163558|ENSG00000136244|ENSG00000054523|ENSG00000088888|ENSG00000162928|ENSG00000181104
single-organism developmental process	Gene Ontology	GO:0044767	83	5610	0.000146968	0.0054883	ENSG00000144535|ENSG00000092067|ENSG00000058668|ENSG00000132436|ENSG00000072163|ENSG00000157827|ENSG00000185920|ENSG00000127022|ENSG00000196781|ENSG00000120451|ENSG00000105676|ENSG00000171540|ENSG00000125779|ENSG00000113163|ENSG00000198914|ENSG00000163558|ENSG00000161011|ENSG00000137642|ENSG00000095585|ENSG00000073614|ENSG00000095587|ENSG00000070610|ENSG00000161021|ENSG00000091831|ENSG00000127445…
developmental process	Gene Ontology	GO:0032502	84	5698	0.000148345	0.00549776	ENSG00000144535|ENSG00000092067|ENSG00000058668|ENSG00000132436|ENSG00000072163|ENSG00000157827|ENSG00000185920|ENSG00000127022|ENSG00000196781|ENSG00000120451|ENSG00000105676|ENSG00000171540|ENSG00000125779|ENSG00000113163|ENSG00000198914|ENSG00000163558|ENSG00000161011|ENSG00000137642|ENSG00000095585|ENSG00000073614|ENSG00000095587|ENSG00000070610|ENSG00000161021|ENSG00000091831|ENSG00000144231…
small GTPase binding	Gene Ontology	GO:0031267	11	271	0.000149759	0.00550842	ENSG00000198853|ENSG00000204764|ENSG00000153201|ENSG00000197226|ENSG00000157827|ENSG00000107185|ENSG00000124789|ENSG00000145703|ENSG00000161202|ENSG00000137642|ENSG00000204634
regulation of signal transduction	Gene Ontology	GO:0009966	47	2680	0.000179301	0.00654582	ENSG00000107175|ENSG00000130766|ENSG00000072163|ENSG00000185920|ENSG00000164654|ENSG00000137642|ENSG00000095585|ENSG00000178175|ENSG00000091831|ENSG00000127445|ENSG00000169220|ENSG00000141753|ENSG00000154127|ENSG00000115266|ENSG00000145708|ENSG00000134046|ENSG00000140443|ENSG00000155011|ENSG00000164532|ENSG00000161202|ENSG00000161203|ENSG00000136244|ENSG00000107731|ENSG00000163162|ENSG00000124212…
negative regulation of cellular protein metabolic process	Gene Ontology	GO:0032269	23	964	0.000183821	0.00666112	ENSG00000084234|ENSG00000163888|ENSG00000137642|ENSG00000073614|ENSG00000147883|ENSG00000091831|ENSG00000198648|ENSG00000127445|ENSG00000169220|ENSG00000147889|ENSG00000143155|ENSG00000154127|ENSG00000122188|ENSG00000140443|ENSG00000204120|ENSG00000136244|ENSG00000135930|ENSG00000163162|ENSG00000107185|ENSG00000058668|ENSG00000276023|ENSG00000071051|ENSG00000122707
regulation of protein modification process	Gene Ontology	GO:0031399	33	1645	0.000188814	0.00679176	ENSG00000188215|ENSG00000101126|ENSG00000130766|ENSG00000165671|ENSG00000163888|ENSG00000137642|ENSG00000073614|ENSG00000147883|ENSG00000091831|ENSG00000198648|ENSG00000127445|ENSG00000169220|ENSG00000147889|ENSG00000143155|ENSG00000154127|ENSG00000140443|ENSG00000161202|ENSG00000136244|ENSG00000127914|ENSG00000109911|ENSG00000163162|ENSG00000122188|ENSG00000101224|ENSG00000088888|ENSG00000181104…
regulation of transcription from RNA polymerase II promoter	Gene Ontology	GO:0006357	35	1795	0.000202605	0.00723462	ENSG00000092067|ENSG00000107175|ENSG00000198914|ENSG00000185920|ENSG00000165671|ENSG00000136715|ENSG00000073614|ENSG00000006468|ENSG00000161021|ENSG00000091831|ENSG00000127445|ENSG00000141425|ENSG00000134046|ENSG00000164532|ENSG00000136244|ENSG00000172216|ENSG00000109911|ENSG00000253293|ENSG00000106443|ENSG00000029153|ENSG00000196781|ENSG00000178175|ENSG00000215271|ENSG00000088888|ENSG00000177853…
negative regulation of protein kinase activity	Gene Ontology	GO:0006469	10	235	0.000207378	0.00735141	ENSG00000147883|ENSG00000169220|ENSG00000147889|ENSG00000154127|ENSG00000276023|ENSG00000122188|ENSG00000140443|ENSG00000163888|ENSG00000137642|ENSG00000136244
regulation of response to stimulus	Gene Ontology	GO:0048583	58	3572	0.000213362	0.00747291	ENSG00000107175|ENSG00000065534|ENSG00000130766|ENSG00000072163|ENSG00000185920|ENSG00000088888|ENSG00000164654|ENSG00000137642|ENSG00000095585|ENSG00000153201|ENSG00000178175|ENSG00000091831|ENSG00000143158|ENSG00000127445|ENSG00000169220|ENSG00000147889|ENSG00000100813|ENSG00000154127|ENSG00000115266|ENSG00000145708|ENSG00000134046|ENSG00000140443|ENSG00000140463|ENSG00000155011|ENSG00000164532…
regulation of biosynthetic process	Gene Ontology	GO:0009889	66	4228	0.000213861	0.00747291	ENSG00000092067|ENSG00000107175|ENSG00000101126|ENSG00000130766|ENSG00000198914|ENSG00000109911|ENSG00000185920|ENSG00000171540|ENSG00000152382|ENSG00000165671|ENSG00000142655|ENSG00000163558|ENSG00000136715|ENSG00000106070|ENSG00000073614|ENSG00000006468|ENSG00000114933|ENSG00000124212|ENSG00000161021|ENSG00000091831|ENSG00000144231|ENSG00000127445|ENSG00000169220|ENSG00000147889|ENSG00000141425…
carbohydrate biosynthetic process	Gene Ontology	GO:0016051	9	196	0.000251116	0.00867702	ENSG00000004864|ENSG00000130766|ENSG00000153201|ENSG00000111713|ENSG00000106070|ENSG00000142657|ENSG00000169764|ENSG00000136244|ENSG00000235194
actin binding	Gene Ontology	GO:0003779	13	390	0.000251868	0.00867702	ENSG00000169994|ENSG00000065534|ENSG00000157827|ENSG00000183386|ENSG00000163092|ENSG00000006747|ENSG00000198467|ENSG00000131746|ENSG00000145703|ENSG00000137076|ENSG00000112186|ENSG00000198771|ENSG00000211455
negative regulation of intracellular signal transduction	Gene Ontology	GO:1902532	14	444	0.000254266	0.00869837	ENSG00000107175|ENSG00000132436|ENSG00000091831|ENSG00000130766|ENSG00000127445|ENSG00000169220|ENSG00000058668|ENSG00000196781|ENSG00000276023|ENSG00000122188|ENSG00000140443|ENSG00000163162|ENSG00000115602|ENSG00000137642
positive regulation of nucleobase-containing compound metabolic process	Gene Ontology	GO:0045935	32	1603	0.000259007	0.00879906	ENSG00000092067|ENSG00000107175|ENSG00000198914|ENSG00000185920|ENSG00000165671|ENSG00000073614|ENSG00000006468|ENSG00000161021|ENSG00000091831|ENSG00000144231|ENSG00000127445|ENSG00000071626|ENSG00000140443|ENSG00000161202|ENSG00000136244|ENSG00000172216|ENSG00000163273|ENSG00000253293|ENSG00000164532|ENSG00000029153|ENSG00000147883|ENSG00000112186|ENSG00000088888|ENSG00000181104|ENSG00000188786…
thrombin receptor signaling pathway	Gene Ontology	GO:0070493	3	10	0.00026995	0.00910754	ENSG00000164220|ENSG00000145703|ENSG00000181104
GTPase binding	Gene Ontology	GO:0051020	11	293	0.000286057	0.00958487	ENSG00000198853|ENSG00000204764|ENSG00000153201|ENSG00000197226|ENSG00000157827|ENSG00000107185|ENSG00000124789|ENSG00000145703|ENSG00000161202|ENSG00000137642|ENSG00000204634
transferase activity	Gene Ontology	GO:0016740	41	2276	0.000288345	0.00959582	ENSG00000115421|ENSG00000186231|ENSG00000214160|ENSG00000065534|ENSG00000109911|ENSG00000122254|ENSG00000197081|ENSG00000000419|ENSG00000163162|ENSG00000113163|ENSG00000165671|ENSG00000136731|ENSG00000163558|ENSG00000136715|ENSG00000211455|ENSG00000141429|ENSG00000179335|ENSG00000198648|ENSG00000140443|ENSG00000169764|ENSG00000213316|ENSG00000127914|ENSG00000107140|ENSG00000125779|ENSG00000166123…
regulation of nitric oxide biosynthetic process	Gene Ontology	GO:0045428	5	53	0.000298812	0.00987694	ENSG00000124212|ENSG00000136244|ENSG00000058668|ENSG00000091831|ENSG00000050748
organelle organization	Gene Ontology	GO:0006996	58	3624	0.000310211	0.0101849	ENSG00000144535|ENSG00000065534|ENSG00000130766|ENSG00000197226|ENSG00000157827|ENSG00000100813|ENSG00000120451|ENSG00000171596|ENSG00000125779|ENSG00000113163|ENSG00000165671|ENSG00000142655|ENSG00000163558|ENSG00000136715|ENSG00000073614|ENSG00000115268|ENSG00000091831|ENSG00000127445|ENSG00000169220|ENSG00000023228|ENSG00000115266|ENSG00000070366|ENSG00000134046|ENSG00000004700|ENSG00000140463…
cellular protein localization	Gene Ontology	GO:0034613	31	1550	0.000315105	0.0102766	ENSG00000107175|ENSG00000233927|ENSG00000197226|ENSG00000185920|ENSG00000164654|ENSG00000171596|ENSG00000142655|ENSG00000163558|ENSG00000137642|ENSG00000157107|ENSG00000115268|ENSG00000091831|ENSG00000204764|ENSG00000127445|ENSG00000115266|ENSG00000140463|ENSG00000148950|ENSG00000161202|ENSG00000161203|ENSG00000136244|ENSG00000204634|ENSG00000006747|ENSG00000137076|ENSG00000088888|ENSG00000181104…
regulation of cellular macromolecule biosynthetic process	Gene Ontology	GO:2000112	61	3879	0.000331039	0.0107248	ENSG00000092067|ENSG00000107175|ENSG00000101126|ENSG00000198914|ENSG00000109911|ENSG00000185920|ENSG00000171540|ENSG00000152382|ENSG00000165671|ENSG00000142655|ENSG00000163558|ENSG00000136715|ENSG00000106070|ENSG00000073614|ENSG00000006468|ENSG00000114933|ENSG00000161021|ENSG00000091831|ENSG00000144231|ENSG00000127445|ENSG00000169220|ENSG00000147889|ENSG00000141425|ENSG00000070366|ENSG00000134046…
cellular macromolecule localization	Gene Ontology	GO:0070727	31	1558	0.000343474	0.0110207	ENSG00000107175|ENSG00000233927|ENSG00000197226|ENSG00000185920|ENSG00000164654|ENSG00000171596|ENSG00000142655|ENSG00000163558|ENSG00000137642|ENSG00000157107|ENSG00000115268|ENSG00000091831|ENSG00000204764|ENSG00000127445|ENSG00000115266|ENSG00000140463|ENSG00000148950|ENSG00000161202|ENSG00000161203|ENSG00000136244|ENSG00000204634|ENSG00000006747|ENSG00000137076|ENSG00000088888|ENSG00000181104…
regulation of protein metabolic process	Gene Ontology	GO:0051246	43	2449	0.000344678	0.0110207	ENSG00000188215|ENSG00000101126|ENSG00000130766|ENSG00000109911|ENSG00000122188|ENSG00000084234|ENSG00000165671|ENSG00000163888|ENSG00000137642|ENSG00000073614|ENSG00000147883|ENSG00000091831|ENSG00000198648|ENSG00000127445|ENSG00000169220|ENSG00000147889|ENSG00000143155|ENSG00000154127|ENSG00000115266|ENSG00000158417|ENSG00000140443|ENSG00000204120|ENSG00000161202|ENSG00000136244|ENSG00000172216…
nucleocytoplasmic transport	Gene Ontology	GO:0006913	14	460	0.000359152	0.0113489	ENSG00000107175|ENSG00000233927|ENSG00000115268|ENSG00000204764|ENSG00000153201|ENSG00000169220|ENSG00000115266|ENSG00000070366|ENSG00000135960|ENSG00000124789|ENSG00000136244|ENSG00000144231|ENSG00000088888|ENSG00000181104
regulation of cellular protein metabolic process	Gene Ontology	GO:0032268	41	2301	0.000359583	0.0113489	ENSG00000188215|ENSG00000101126|ENSG00000130766|ENSG00000109911|ENSG00000122188|ENSG00000084234|ENSG00000165671|ENSG00000163888|ENSG00000137642|ENSG00000073614|ENSG00000147883|ENSG00000091831|ENSG00000198648|ENSG00000127445|ENSG00000169220|ENSG00000147889|ENSG00000143155|ENSG00000154127|ENSG00000158417|ENSG00000140443|ENSG00000204120|ENSG00000161202|ENSG00000136244|ENSG00000144231|ENSG00000127914…
Ras GTPase binding	Gene Ontology	GO:0017016	10	253	0.000364641	0.0114348	ENSG00000198853|ENSG00000204764|ENSG00000153201|ENSG00000197226|ENSG00000157827|ENSG00000107185|ENSG00000124789|ENSG00000145703|ENSG00000161202|ENSG00000204634
peptidyl-serine modification	Gene Ontology	GO:0018209	10	254	0.000375697	0.0116324	ENSG00000141429|ENSG00000115896|ENSG00000198648|ENSG00000127914|ENSG00000058668|ENSG00000071051|ENSG00000165671|ENSG00000163558|ENSG00000136244|ENSG00000211455
regulation of neuron death	Gene Ontology	GO:1901214	10	254	0.000375697	0.0116324	ENSG00000137642|ENSG00000091831|ENSG00000127445|ENSG00000101126|ENSG00000162924|ENSG00000163558|ENSG00000107731|ENSG00000136244|ENSG00000172216|ENSG00000181104
single-organism cellular localization	Gene Ontology	GO:1902580	24	1083	0.00038305	0.0117854	ENSG00000107175|ENSG00000233927|ENSG00000185920|ENSG00000113163|ENSG00000142655|ENSG00000163558|ENSG00000157107|ENSG00000115268|ENSG00000204764|ENSG00000198722|ENSG00000115266|ENSG00000140463|ENSG00000161203|ENSG00000136244|ENSG00000054523|ENSG00000158560|ENSG00000124789|ENSG00000088888|ENSG00000181104|ENSG00000153201|ENSG00000099864|ENSG00000127022|ENSG00000135960|ENSG00000162928
intracellular protein transport	Gene Ontology	GO:0006886	23	1018	0.000390673	0.0119448	ENSG00000107175|ENSG00000233927|ENSG00000197226|ENSG00000185920|ENSG00000171596|ENSG00000142655|ENSG00000163558|ENSG00000137642|ENSG00000115268|ENSG00000204764|ENSG00000115266|ENSG00000148950|ENSG00000161203|ENSG00000136244|ENSG00000204634|ENSG00000088888|ENSG00000181104|ENSG00000153201|ENSG00000099864|ENSG00000135966|ENSG00000135960|ENSG00000050748|ENSG00000162928
positive regulation of cellular process	Gene Ontology	GO:0048522	69	4579	0.000408689	0.0123459	ENSG00000092067|ENSG00000107175|ENSG00000058668|ENSG00000188215|ENSG00000198914|ENSG00000160049|ENSG00000072163|ENSG00000185920|ENSG00000197081|ENSG00000164654|ENSG00000171596|ENSG00000065534|ENSG00000165671|ENSG00000163558|ENSG00000137642|ENSG00000095585|ENSG00000073614|ENSG00000006468|ENSG00000071626|ENSG00000161021|ENSG00000091831|ENSG00000143158|ENSG00000127445|ENSG00000169220|ENSG00000147889…
cellular protein complex assembly	Gene Ontology	GO:0043623	15	523	0.000408838	0.0123459	ENSG00000006747|ENSG00000164532|ENSG00000198722|ENSG00000023228|ENSG00000196365|ENSG00000115286|ENSG00000134046|ENSG00000140463|ENSG00000124789|ENSG00000145703|ENSG00000148950|ENSG00000071051|ENSG00000127914|ENSG00000171530|ENSG00000157107
negative regulation of protein metabolic process	Gene Ontology	GO:0051248	23	1022	0.000412038	0.0123662	ENSG00000084234|ENSG00000163888|ENSG00000137642|ENSG00000073614|ENSG00000147883|ENSG00000091831|ENSG00000198648|ENSG00000127445|ENSG00000169220|ENSG00000147889|ENSG00000143155|ENSG00000154127|ENSG00000122188|ENSG00000140443|ENSG00000204120|ENSG00000136244|ENSG00000135930|ENSG00000163162|ENSG00000107185|ENSG00000058668|ENSG00000276023|ENSG00000071051|ENSG00000122707
positive regulation of RNA metabolic process	Gene Ontology	GO:0051254	28	1365	0.000422698	0.0125015	ENSG00000092067|ENSG00000107175|ENSG00000165671|ENSG00000185920|ENSG00000198914|ENSG00000073614|ENSG00000006468|ENSG00000161021|ENSG00000091831|ENSG00000144231|ENSG00000127445|ENSG00000071626|ENSG00000161202|ENSG00000136244|ENSG00000172216|ENSG00000253293|ENSG00000164532|ENSG00000029153|ENSG00000147883|ENSG00000088888|ENSG00000181104|ENSG00000188786|ENSG00000161011|ENSG00000162924|ENSG00000143164…
toxin metabolic process	Gene Ontology	GO:0009404	3	12	0.000423092	0.0125015	ENSG00000010932|ENSG00000132437|ENSG00000094963
nuclear transport	Gene Ontology	GO:0051169	14	468	0.000424213	0.0125015	ENSG00000107175|ENSG00000233927|ENSG00000115268|ENSG00000204764|ENSG00000153201|ENSG00000169220|ENSG00000115266|ENSG00000070366|ENSG00000135960|ENSG00000124789|ENSG00000136244|ENSG00000144231|ENSG00000088888|ENSG00000181104
single-organism biosynthetic process	Gene Ontology	GO:0044711	27	1298	0.000435768	0.0127651	ENSG00000214160|ENSG00000058668|ENSG00000130766|ENSG00000000419|ENSG00000113163|ENSG00000235194|ENSG00000143158|ENSG00000106070|ENSG00000143199|ENSG00000169764|ENSG00000213316|ENSG00000005187|ENSG00000125779|ENSG00000124212|ENSG00000166123|ENSG00000163273|ENSG00000111713|ENSG00000112186|ENSG00000136244|ENSG00000181104|ENSG00000004864|ENSG00000153201|ENSG00000139144|ENSG00000101126|ENSG00000099864…
regulation of cellular biosynthetic process	Gene Ontology	GO:0031326	64	4171	0.000441214	0.0128477	ENSG00000092067|ENSG00000107175|ENSG00000101126|ENSG00000198914|ENSG00000109911|ENSG00000185920|ENSG00000171540|ENSG00000152382|ENSG00000165671|ENSG00000142655|ENSG00000163558|ENSG00000136715|ENSG00000106070|ENSG00000073614|ENSG00000006468|ENSG00000114933|ENSG00000124212|ENSG00000161021|ENSG00000091831|ENSG00000144231|ENSG00000127445|ENSG00000169220|ENSG00000147889|ENSG00000141425|ENSG00000070366…
energy derivation by oxidation of organic compounds	Gene Ontology	GO:0015980	10	261	0.000461188	0.0133499	ENSG00000125779|ENSG00000004864|ENSG00000164919|ENSG00000023228|ENSG00000115286|ENSG00000111713|ENSG00000106070|ENSG00000131459|ENSG00000169764|ENSG00000235194
regulation of kinase activity	Gene Ontology	GO:0043549	19	776	0.000494863	0.0142404	ENSG00000109911|ENSG00000058668|ENSG00000130766|ENSG00000153201|ENSG00000169220|ENSG00000147889|ENSG00000101126|ENSG00000154127|ENSG00000276023|ENSG00000122188|ENSG00000140443|ENSG00000147883|ENSG00000071051|ENSG00000101224|ENSG00000161202|ENSG00000163888|ENSG00000137642|ENSG00000136244|ENSG00000181104
peptidyl-amino acid modification	Gene Ontology	GO:0018193	25	1173	0.000506741	0.0144969	ENSG00000101126|ENSG00000109911|ENSG00000000419|ENSG00000165671|ENSG00000163558|ENSG00000136715|ENSG00000211455|ENSG00000141429|ENSG00000179335|ENSG00000115896|ENSG00000127445|ENSG00000140443|ENSG00000136244|ENSG00000058668|ENSG00000127914|ENSG00000107140|ENSG00000124789|ENSG00000181104|ENSG00000198648|ENSG00000153201|ENSG00000173889|ENSG00000152382|ENSG00000182580|ENSG00000071051|ENSG00000170946
axon	Gene Ontology	GO:0030424	13	423	0.000530941	0.015101	ENSG00000132437|ENSG00000091831|ENSG00000198722|ENSG00000185920|ENSG00000101126|ENSG00000152413|ENSG00000145708|ENSG00000099864|ENSG00000143199|ENSG00000127022|ENSG00000161203|ENSG00000115594|ENSG00000054523
regulation of protein kinase activity	Gene Ontology	GO:0045859	18	721	0.000557509	0.0157649	ENSG00000109911|ENSG00000058668|ENSG00000130766|ENSG00000169220|ENSG00000147889|ENSG00000101126|ENSG00000154127|ENSG00000276023|ENSG00000122188|ENSG00000140443|ENSG00000147883|ENSG00000071051|ENSG00000101224|ENSG00000161202|ENSG00000163888|ENSG00000137642|ENSG00000136244|ENSG00000181104
nucleotide-sugar metabolic process	Gene Ontology	GO:0009225	4	34	0.000572051	0.0160832	ENSG00000000419|ENSG00000169764|ENSG00000131459|ENSG00000136731
positive regulation of RNA biosynthetic process	Gene Ontology	GO:1902680	27	1323	0.000579548	0.0162008	ENSG00000092067|ENSG00000107175|ENSG00000165671|ENSG00000185920|ENSG00000198914|ENSG00000073614|ENSG00000006468|ENSG00000161021|ENSG00000091831|ENSG00000144231|ENSG00000127445|ENSG00000161202|ENSG00000136244|ENSG00000172216|ENSG00000253293|ENSG00000164532|ENSG00000029153|ENSG00000147883|ENSG00000088888|ENSG00000181104|ENSG00000188786|ENSG00000161011|ENSG00000162924|ENSG00000143164|ENSG00000071051…
transferase activity, transferring phosphorus-containing groups	Gene Ontology	GO:0016772	22	982	0.000583516	0.0162191	ENSG00000115421|ENSG00000065534|ENSG00000197081|ENSG00000113163|ENSG00000163558|ENSG00000211455|ENSG00000179335|ENSG00000198648|ENSG00000140443|ENSG00000169764|ENSG00000127914|ENSG00000107140|ENSG00000125779|ENSG00000111713|ENSG00000122008|ENSG00000144231|ENSG00000139144|ENSG00000161011|ENSG00000107447|ENSG00000182580|ENSG00000050748|ENSG00000135945
cell surface receptor signaling pathway	Gene Ontology	GO:0007166	44	2592	0.000589637	0.0162966	ENSG00000072163|ENSG00000185920|ENSG00000088888|ENSG00000197081|ENSG00000095585|ENSG00000147883|ENSG00000091831|ENSG00000127445|ENSG00000169220|ENSG00000141753|ENSG00000115266|ENSG00000145708|ENSG00000134046|ENSG00000140443|ENSG00000204120|ENSG00000140463|ENSG00000155011|ENSG00000164532|ENSG00000161202|ENSG00000011105|ENSG00000136244|ENSG00000107731|ENSG00000161203|ENSG00000197965|ENSG00000122188…
small molecule metabolic process	Gene Ontology	GO:0044281	35	1906	0.000600098	0.0164926	ENSG00000101126|ENSG00000130766|ENSG00000164919|ENSG00000010932|ENSG00000000419|ENSG00000142657|ENSG00000137642|ENSG00000235194|ENSG00000143158|ENSG00000023228|ENSG00000070610|ENSG00000106070|ENSG00000143199|ENSG00000141753|ENSG00000213316|ENSG00000005187|ENSG00000125779|ENSG00000124212|ENSG00000166123|ENSG00000163273|ENSG00000131459|ENSG00000115286|ENSG00000130005|ENSG00000112186|ENSG00000136244…
regulation of hydrolase activity	Gene Ontology	GO:0051336	27	1329	0.000619714	0.0169365	ENSG00000107175|ENSG00000197226|ENSG00000084234|ENSG00000137642|ENSG00000073614|ENSG00000091831|ENSG00000127445|ENSG00000169220|ENSG00000143155|ENSG00000171596|ENSG00000140463|ENSG00000161202|ENSG00000136244|ENSG00000181104|ENSG00000127914|ENSG00000146090|ENSG00000107185|ENSG00000145703|ENSG00000170946|ENSG00000204634|ENSG00000132554|ENSG00000198467|ENSG00000182580|ENSG00000071051|ENSG00000122707…
regulation of gene expression	Gene Ontology	GO:0010468	64	4226	0.000625773	0.0170071	ENSG00000092067|ENSG00000107175|ENSG00000152382|ENSG00000198914|ENSG00000109911|ENSG00000185920|ENSG00000171540|ENSG00000100813|ENSG00000135960|ENSG00000165671|ENSG00000142655|ENSG00000163558|ENSG00000136715|ENSG00000073614|ENSG00000006468|ENSG00000114933|ENSG00000071626|ENSG00000179335|ENSG00000161021|ENSG00000091831|ENSG00000144231|ENSG00000127445|ENSG00000169220|ENSG00000147889|ENSG00000141425…
establishment of protein localization	Gene Ontology	GO:0045184	36	1988	0.000640384	0.017308	ENSG00000107175|ENSG00000233927|ENSG00000197226|ENSG00000185920|ENSG00000120451|ENSG00000171596|ENSG00000142655|ENSG00000163558|ENSG00000137642|ENSG00000176783|ENSG00000115268|ENSG00000204764|ENSG00000143158|ENSG00000115266|ENSG00000140463|ENSG00000148950|ENSG00000161203|ENSG00000136244|ENSG00000204634|ENSG00000169228|ENSG00000122188|ENSG00000111711|ENSG00000124789|ENSG00000213064|ENSG00000127022…
regulation of RNA metabolic process	Gene Ontology	GO:0051252	57	3650	0.000650586	0.0174872	ENSG00000092067|ENSG00000107175|ENSG00000058668|ENSG00000198914|ENSG00000185920|ENSG00000171540|ENSG00000152382|ENSG00000165671|ENSG00000142655|ENSG00000163558|ENSG00000136715|ENSG00000073614|ENSG00000006468|ENSG00000114933|ENSG00000071626|ENSG00000179335|ENSG00000161021|ENSG00000091831|ENSG00000144231|ENSG00000127445|ENSG00000169220|ENSG00000147889|ENSG00000141425|ENSG00000134046|ENSG00000164532…
kinase binding	Gene Ontology	GO:0019900	16	609	0.000666203	0.0177452	ENSG00000050748|ENSG00000161021|ENSG00000101224|ENSG00000198648|ENSG00000127445|ENSG00000169220|ENSG00000147889|ENSG00000161011|ENSG00000160633|ENSG00000122188|ENSG00000147883|ENSG00000137078|ENSG00000163888|ENSG00000172216|ENSG00000095585|ENSG00000088888
nitric oxide biosynthetic process	Gene Ontology	GO:0006809	5	64	0.000669821	0.0177452	ENSG00000124212|ENSG00000136244|ENSG00000058668|ENSG00000091831|ENSG00000050748
positive regulation of biological process	Gene Ontology	GO:0048518	74	5089	0.000671067	0.0177452	ENSG00000092067|ENSG00000107175|ENSG00000058668|ENSG00000188215|ENSG00000198914|ENSG00000160049|ENSG00000072163|ENSG00000185920|ENSG00000197081|ENSG00000164654|ENSG00000171596|ENSG00000065534|ENSG00000165671|ENSG00000163558|ENSG00000137642|ENSG00000095585|ENSG00000073614|ENSG00000006468|ENSG00000071626|ENSG00000161021|ENSG00000091831|ENSG00000143158|ENSG00000127445|ENSG00000169220|ENSG00000147889…
transcription from RNA polymerase II promoter	Gene Ontology	GO:0006366	36	1996	0.000687891	0.0180449	ENSG00000092067|ENSG00000107175|ENSG00000198914|ENSG00000185920|ENSG00000165671|ENSG00000136715|ENSG00000073614|ENSG00000006468|ENSG00000161021|ENSG00000091831|ENSG00000127445|ENSG00000141425|ENSG00000134046|ENSG00000164532|ENSG00000136244|ENSG00000172216|ENSG00000109911|ENSG00000253293|ENSG00000106443|ENSG00000029153|ENSG00000196781|ENSG00000178175|ENSG00000215271|ENSG00000088888|ENSG00000144231…
regulation of macromolecule biosynthetic process	Gene Ontology	GO:0010556	61	3992	0.000696844	0.0180449	ENSG00000092067|ENSG00000107175|ENSG00000101126|ENSG00000198914|ENSG00000109911|ENSG00000185920|ENSG00000171540|ENSG00000152382|ENSG00000165671|ENSG00000142655|ENSG00000163558|ENSG00000136715|ENSG00000106070|ENSG00000073614|ENSG00000006468|ENSG00000114933|ENSG00000161021|ENSG00000091831|ENSG00000144231|ENSG00000127445|ENSG00000169220|ENSG00000147889|ENSG00000141425|ENSG00000070366|ENSG00000134046…
glutamate receptor binding	Gene Ontology	GO:0035254	4	36	0.000697154	0.0180449	ENSG00000127022|ENSG00000152413|ENSG00000091831|ENSG00000115594
beta-tubulin binding	Gene Ontology	GO:0048487	4	36	0.000697154	0.0180449	ENSG00000101126|ENSG00000140463|ENSG00000171530|ENSG00000142655
cell death	Gene Ontology	GO:0008219	35	1923	0.000701061	0.0180505	ENSG00000107175|ENSG00000188215|ENSG00000160049|ENSG00000072163|ENSG00000100813|ENSG00000197081|ENSG00000198914|ENSG00000163558|ENSG00000137642|ENSG00000054523|ENSG00000091831|ENSG00000127445|ENSG00000023228|ENSG00000135960|ENSG00000140443|ENSG00000143199|ENSG00000131746|ENSG00000136244|ENSG00000172216|ENSG00000124212|ENSG00000196781|ENSG00000198722|ENSG00000006747|ENSG00000144354|ENSG00000132436…
regulation of reactive oxygen species biosynthetic process	Gene Ontology	GO:1903426	5	65	0.000715477	0.0183252	ENSG00000124212|ENSG00000136244|ENSG00000058668|ENSG00000091831|ENSG00000050748
regulation of transport	Gene Ontology	GO:0051049	33	1779	0.000733931	0.0185753	ENSG00000107175|ENSG00000065534|ENSG00000197226|ENSG00000185920|ENSG00000184611|ENSG00000171596|ENSG00000163558|ENSG00000137642|ENSG00000176783|ENSG00000091831|ENSG00000198648|ENSG00000198722|ENSG00000154127|ENSG00000115266|ENSG00000145708|ENSG00000106070|ENSG00000115474|ENSG00000136244|ENSG00000204634|ENSG00000127914|ENSG00000115602|ENSG00000006747|ENSG00000124789|ENSG00000088888|ENSG00000181104…
regulation of cell death	Gene Ontology	GO:0010941	29	1487	0.000734144	0.0185753	ENSG00000107175|ENSG00000188215|ENSG00000160049|ENSG00000072163|ENSG00000100813|ENSG00000197081|ENSG00000198914|ENSG00000163558|ENSG00000137642|ENSG00000091831|ENSG00000127445|ENSG00000147889|ENSG00000140443|ENSG00000143199|ENSG00000107731|ENSG00000136244|ENSG00000172216|ENSG00000124212|ENSG00000196781|ENSG00000006747|ENSG00000181104|ENSG00000132436|ENSG00000161011|ENSG00000101126|ENSG00000151208…
positive regulation of nitrogen compound metabolic process	Gene Ontology	GO:0051173	32	1706	0.000739596	0.0185753	ENSG00000092067|ENSG00000107175|ENSG00000198914|ENSG00000185920|ENSG00000165671|ENSG00000073614|ENSG00000006468|ENSG00000161021|ENSG00000091831|ENSG00000144231|ENSG00000127445|ENSG00000071626|ENSG00000140443|ENSG00000161202|ENSG00000136244|ENSG00000172216|ENSG00000163273|ENSG00000253293|ENSG00000164532|ENSG00000029153|ENSG00000147883|ENSG00000112186|ENSG00000088888|ENSG00000181104|ENSG00000188786…
regulation of transferase activity	Gene Ontology	GO:0051338	21	934	0.000743062	0.0185753	ENSG00000188215|ENSG00000109911|ENSG00000058668|ENSG00000130766|ENSG00000153201|ENSG00000127445|ENSG00000169220|ENSG00000147889|ENSG00000101126|ENSG00000154127|ENSG00000276023|ENSG00000122188|ENSG00000140443|ENSG00000147883|ENSG00000071051|ENSG00000101224|ENSG00000161202|ENSG00000163888|ENSG00000137642|ENSG00000136244|ENSG00000181104
nucleic acid binding	Gene Ontology	GO:0003676	60	3919	0.000744227	0.0185753	ENSG00000115421|ENSG00000144535|ENSG00000233927|ENSG00000198914|ENSG00000107175|ENSG00000105671|ENSG00000100813|ENSG00000171540|ENSG00000084234|ENSG00000165671|ENSG00000125817|ENSG00000073614|ENSG00000006468|ENSG00000071626|ENSG00000179335|ENSG00000178175|ENSG00000091831|ENSG00000183431|ENSG00000147889|ENSG00000127022|ENSG00000070366|ENSG00000134046|ENSG00000004700|ENSG00000204120|ENSG00000135972…
nitric oxide metabolic process	Gene Ontology	GO:0046209	5	67	0.000813719	0.0202067	ENSG00000124212|ENSG00000136244|ENSG00000058668|ENSG00000091831|ENSG00000050748
regulation of glucose metabolic process	Gene Ontology	GO:0010906	6	103	0.000849887	0.0207325	ENSG00000130766|ENSG00000153201|ENSG00000141753|ENSG00000106070|ENSG00000136244|ENSG00000235194
apoptotic process	Gene Ontology	GO:0006915	33	1795	0.000851946	0.0207325	ENSG00000107175|ENSG00000188215|ENSG00000160049|ENSG00000072163|ENSG00000100813|ENSG00000197081|ENSG00000198914|ENSG00000163558|ENSG00000054523|ENSG00000091831|ENSG00000127445|ENSG00000023228|ENSG00000140443|ENSG00000143199|ENSG00000131746|ENSG00000136244|ENSG00000172216|ENSG00000124212|ENSG00000196781|ENSG00000198722|ENSG00000006747|ENSG00000144354|ENSG00000132436|ENSG00000147889|ENSG00000181104…
nucleotide binding	Gene Ontology	GO:0000166	40	2327	0.000853393	0.0207325	ENSG00000115421|ENSG00000065534|ENSG00000105671|ENSG00000010932|ENSG00000163558|ENSG00000211455|ENSG00000175414|ENSG00000054523|ENSG00000169228|ENSG00000071626|ENSG00000179335|ENSG00000204764|ENSG00000198648|ENSG00000134046|ENSG00000004700|ENSG00000140443|ENSG00000143199|ENSG00000182580|ENSG00000100813|ENSG00000169764|ENSG00000161204|ENSG00000005187|ENSG00000107140|ENSG00000132622|ENSG00000125779…
muscle system process	Gene Ontology	GO:0003012	12	390	0.000854825	0.0207325	ENSG00000152413|ENSG00000065534|ENSG00000127445|ENSG00000164532|ENSG00000058668|ENSG00000171596|ENSG00000198771|ENSG00000198467|ENSG00000130005|ENSG00000113163|ENSG00000137076|ENSG00000181104
response to inorganic substance	Gene Ontology	GO:0010035	14	504	0.000856148	0.0207325	ENSG00000152413|ENSG00000101126|ENSG00000004864|ENSG00000136244|ENSG00000185920|ENSG00000058668|ENSG00000196365|ENSG00000145708|ENSG00000115607|ENSG00000143199|ENSG00000188786|ENSG00000213316|ENSG00000050748|ENSG00000115594
nucleoside phosphate binding	Gene Ontology	GO:1901265	40	2328	0.000860323	0.0207325	ENSG00000115421|ENSG00000065534|ENSG00000105671|ENSG00000010932|ENSG00000163558|ENSG00000211455|ENSG00000175414|ENSG00000054523|ENSG00000169228|ENSG00000071626|ENSG00000179335|ENSG00000204764|ENSG00000198648|ENSG00000134046|ENSG00000004700|ENSG00000140443|ENSG00000143199|ENSG00000182580|ENSG00000100813|ENSG00000169764|ENSG00000161204|ENSG00000005187|ENSG00000107140|ENSG00000132622|ENSG00000125779…
macromolecular complex	Gene Ontology	GO:0032991	68	4619	0.000869188	0.0208435	ENSG00000144535|ENSG00000186231|ENSG00000233927|ENSG00000058668|ENSG00000130766|ENSG00000160049|ENSG00000188215|ENSG00000100813|ENSG00000197081|ENSG00000164654|ENSG00000115266|ENSG00000000419|ENSG00000142655|ENSG00000163558|ENSG00000136715|ENSG00000137642|ENSG00000073614|ENSG00000054523|ENSG00000161021|ENSG00000091831|ENSG00000204764|ENSG00000183431|ENSG00000023228|ENSG00000141425|ENSG00000070366…
negative regulation of MAPK cascade	Gene Ontology	GO:0043409	7	144	0.00088582	0.021039	ENSG00000163162|ENSG00000127445|ENSG00000169220|ENSG00000276023|ENSG00000122188|ENSG00000140443|ENSG00000137642
neuron death	Gene Ontology	GO:0070997	10	285	0.000885945	0.021039	ENSG00000137642|ENSG00000091831|ENSG00000127445|ENSG00000101126|ENSG00000162924|ENSG00000163558|ENSG00000107731|ENSG00000136244|ENSG00000172216|ENSG00000181104
single-multicellular organism process	Gene Ontology	GO:0044707	82	5839	0.000895644	0.0211666	ENSG00000144535|ENSG00000092067|ENSG00000058668|ENSG00000132436|ENSG00000072163|ENSG00000185920|ENSG00000196781|ENSG00000120451|ENSG00000105676|ENSG00000171540|ENSG00000065534|ENSG00000113163|ENSG00000198914|ENSG00000163558|ENSG00000137642|ENSG00000095585|ENSG00000073614|ENSG00000095587|ENSG00000070610|ENSG00000161021|ENSG00000091831|ENSG00000198648|ENSG00000127445|ENSG00000169220|ENSG00000105426…
enzyme linked receptor protein signaling pathway	Gene Ontology	GO:0007167	21	949	0.000904167	0.0212653	ENSG00000147883|ENSG00000091831|ENSG00000161203|ENSG00000127445|ENSG00000169220|ENSG00000197081|ENSG00000163273|ENSG00000197965|ENSG00000106443|ENSG00000106070|ENSG00000095585|ENSG00000140443|ENSG00000204120|ENSG00000135966|ENSG00000182580|ENSG00000164532|ENSG00000071051|ENSG00000169045|ENSG00000164692|ENSG00000141753|ENSG00000144231
membrane part	Gene Ontology	GO:0044425	89	6463	0.000908802	0.0212721	ENSG00000107175|ENSG00000122254|ENSG00000185920|ENSG00000213316|ENSG00000163558|ENSG00000137642|ENSG00000157107|ENSG00000164220|ENSG00000091831|ENSG00000157224|ENSG00000137078|ENSG00000137076|ENSG00000161203|ENSG00000163162|ENSG00000124212|ENSG00000115286|ENSG00000137414|ENSG00000139144|ENSG00000198246|ENSG00000170049|ENSG00000214160|ENSG00000058668|ENSG00000164919|ENSG00000084234|ENSG00000142655…
positive regulation of apoptotic process	Gene Ontology	GO:0043065	15	569	0.000944132	0.0219938	ENSG00000188215|ENSG00000124212|ENSG00000160049|ENSG00000127445|ENSG00000147889|ENSG00000161011|ENSG00000197081|ENSG00000006747|ENSG00000071051|ENSG00000143199|ENSG00000100813|ENSG00000163558|ENSG00000136244|ENSG00000050748|ENSG00000181104
regulation of I-kappaB kinase/NF-kappaB signaling	Gene Ontology	GO:0043122	9	238	0.00096254	0.0223163	ENSG00000091831|ENSG00000161011|ENSG00000196781|ENSG00000162924|ENSG00000111711|ENSG00000115602|ENSG00000135960|ENSG00000088888|ENSG00000181104
negative regulation of catalytic activity	Gene Ontology	GO:0043086	19	824	0.000993152	0.0229174	ENSG00000136244|ENSG00000147883|ENSG00000153201|ENSG00000169220|ENSG00000147889|ENSG00000058668|ENSG00000154127|ENSG00000099864|ENSG00000276023|ENSG00000122188|ENSG00000140443|ENSG00000140463|ENSG00000084234|ENSG00000145703|ENSG00000122707|ENSG00000163888|ENSG00000137642|ENSG00000073614|ENSG00000143155
positive regulation of programmed cell death	Gene Ontology	GO:0043068	15	574	0.00102786	0.0234635	ENSG00000188215|ENSG00000124212|ENSG00000160049|ENSG00000127445|ENSG00000147889|ENSG00000161011|ENSG00000197081|ENSG00000006747|ENSG00000071051|ENSG00000143199|ENSG00000100813|ENSG00000163558|ENSG00000136244|ENSG00000050748|ENSG00000181104
positive regulation of transcription, DNA-templated	Gene Ontology	GO:0045893	26	1305	0.0010312	0.0234635	ENSG00000092067|ENSG00000107175|ENSG00000165671|ENSG00000185920|ENSG00000198914|ENSG00000073614|ENSG00000006468|ENSG00000161021|ENSG00000091831|ENSG00000127445|ENSG00000161202|ENSG00000136244|ENSG00000172216|ENSG00000253293|ENSG00000164532|ENSG00000029153|ENSG00000147883|ENSG00000088888|ENSG00000181104|ENSG00000188786|ENSG00000161011|ENSG00000162924|ENSG00000143164|ENSG00000071051|ENSG00000160633…
positive regulation of nucleic acid-templated transcription	Gene Ontology	GO:1903508	26	1305	0.0010312	0.0234635	ENSG00000092067|ENSG00000107175|ENSG00000165671|ENSG00000185920|ENSG00000198914|ENSG00000073614|ENSG00000006468|ENSG00000161021|ENSG00000091831|ENSG00000127445|ENSG00000161202|ENSG00000136244|ENSG00000172216|ENSG00000253293|ENSG00000164532|ENSG00000029153|ENSG00000147883|ENSG00000088888|ENSG00000181104|ENSG00000188786|ENSG00000161011|ENSG00000162924|ENSG00000143164|ENSG00000071051|ENSG00000160633…
reactive nitrogen species metabolic process	Gene Ontology	GO:2001057	5	71	0.00103995	0.0234767	ENSG00000124212|ENSG00000136244|ENSG00000058668|ENSG00000091831|ENSG00000050748
programmed cell death	Gene Ontology	GO:0012501	33	1817	0.00104138	0.0234767	ENSG00000107175|ENSG00000188215|ENSG00000160049|ENSG00000072163|ENSG00000100813|ENSG00000197081|ENSG00000198914|ENSG00000163558|ENSG00000054523|ENSG00000091831|ENSG00000127445|ENSG00000023228|ENSG00000140443|ENSG00000143199|ENSG00000131746|ENSG00000136244|ENSG00000172216|ENSG00000124212|ENSG00000196781|ENSG00000198722|ENSG00000006747|ENSG00000144354|ENSG00000132436|ENSG00000147889|ENSG00000181104…
peptidyl-serine phosphorylation	Gene Ontology	GO:0018105	9	241	0.00104738	0.0235035	ENSG00000115896|ENSG00000198648|ENSG00000127914|ENSG00000058668|ENSG00000071051|ENSG00000165671|ENSG00000163558|ENSG00000136244|ENSG00000211455
macromolecular complex subunit organization	Gene Ontology	GO:0043933	40	2355	0.0010673	0.0238413	ENSG00000165671|ENSG00000142655|ENSG00000136715|ENSG00000137642|ENSG00000073614|ENSG00000157107|ENSG00000115268|ENSG00000091831|ENSG00000198722|ENSG00000183431|ENSG00000023228|ENSG00000115266|ENSG00000134046|ENSG00000140443|ENSG00000140463|ENSG00000148950|ENSG00000161202|ENSG00000127914|ENSG00000171530|ENSG00000109911|ENSG00000164532|ENSG00000135972|ENSG00000196781|ENSG00000115286|ENSG00000006747…
RNA binding	Gene Ontology	GO:0003723	30	1599	0.00108588	0.024146	ENSG00000115421|ENSG00000144535|ENSG00000233927|ENSG00000105671|ENSG00000100813|ENSG00000134046|ENSG00000179335|ENSG00000115268|ENSG00000183431|ENSG00000147889|ENSG00000070366|ENSG00000071626|ENSG00000204120|ENSG00000135972|ENSG00000171530|ENSG00000135930|ENSG00000196504|ENSG00000158417|ENSG00000169045|ENSG00000144231|ENSG00000179151|ENSG00000153201|ENSG00000196365|ENSG00000276023|ENSG00000162927…
single-organism carbohydrate metabolic process	Gene Ontology	GO:0044723	16	641	0.00112421	0.0248851	ENSG00000111713|ENSG00000214160|ENSG00000004864|ENSG00000130766|ENSG00000153201|ENSG00000141429|ENSG00000161013|ENSG00000141753|ENSG00000101126|ENSG00000000419|ENSG00000106070|ENSG00000142657|ENSG00000136731|ENSG00000169764|ENSG00000136244|ENSG00000235194
regulation of apoptotic process	Gene Ontology	GO:0042981	27	1386	0.00114087	0.0251402	ENSG00000107175|ENSG00000188215|ENSG00000160049|ENSG00000072163|ENSG00000100813|ENSG00000197081|ENSG00000198914|ENSG00000163558|ENSG00000091831|ENSG00000127445|ENSG00000147889|ENSG00000140443|ENSG00000143199|ENSG00000136244|ENSG00000107731|ENSG00000124212|ENSG00000196781|ENSG00000006747|ENSG00000172216|ENSG00000181104|ENSG00000132436|ENSG00000161011|ENSG00000101126|ENSG00000151208|ENSG00000146066…
positive regulation of cellular biosynthetic process	Gene Ontology	GO:0031328	31	1679	0.00115163	0.0252637	ENSG00000092067|ENSG00000107175|ENSG00000198914|ENSG00000185920|ENSG00000165671|ENSG00000073614|ENSG00000006468|ENSG00000161021|ENSG00000091831|ENSG00000144231|ENSG00000127445|ENSG00000140443|ENSG00000161202|ENSG00000136244|ENSG00000172216|ENSG00000163273|ENSG00000253293|ENSG00000164532|ENSG00000029153|ENSG00000147883|ENSG00000112186|ENSG00000088888|ENSG00000181104|ENSG00000188786|ENSG00000161011…
response to stress	Gene Ontology	GO:0006950	56	3656	0.00115699	0.0252679	ENSG00000092067|ENSG00000107175|ENSG00000065534|ENSG00000130766|ENSG00000136244|ENSG00000010932|ENSG00000088888|ENSG00000164654|ENSG00000113163|ENSG00000174004|ENSG00000095585|ENSG00000114933|ENSG00000164220|ENSG00000198648|ENSG00000169220|ENSG00000147889|ENSG00000143155|ENSG00000154127|ENSG00000115607|ENSG00000145708|ENSG00000004700|ENSG00000140443|ENSG00000204120|ENSG00000135972|ENSG00000161202…
multicellular organismal reproductive process	Gene Ontology	GO:0048609	18	775	0.00124199	0.0268842	ENSG00000073614|ENSG00000107140|ENSG00000125779|ENSG00000091831|ENSG00000253293|ENSG00000071626|ENSG00000163273|ENSG00000058668|ENSG00000197081|ENSG00000101126|ENSG00000134046|ENSG00000143199|ENSG00000130005|ENSG00000140463|ENSG00000101224|ENSG00000124212|ENSG00000172216|ENSG00000115594
negative regulation of transferase activity	Gene Ontology	GO:0051348	11	353	0.00126304	0.0272193	ENSG00000147883|ENSG00000153201|ENSG00000169220|ENSG00000147889|ENSG00000154127|ENSG00000276023|ENSG00000122188|ENSG00000140443|ENSG00000163888|ENSG00000137642|ENSG00000136244
regulation of programmed cell death	Gene Ontology	GO:0043067	27	1398	0.00128972	0.0276723	ENSG00000107175|ENSG00000188215|ENSG00000160049|ENSG00000072163|ENSG00000100813|ENSG00000197081|ENSG00000198914|ENSG00000163558|ENSG00000091831|ENSG00000127445|ENSG00000147889|ENSG00000140443|ENSG00000143199|ENSG00000136244|ENSG00000107731|ENSG00000124212|ENSG00000196781|ENSG00000006747|ENSG00000172216|ENSG00000181104|ENSG00000132436|ENSG00000161011|ENSG00000101126|ENSG00000151208|ENSG00000146066…
response to abiotic stimulus	Gene Ontology	GO:0009628	23	1116	0.00131122	0.0280109	ENSG00000188215|ENSG00000065534|ENSG00000010932|ENSG00000006468|ENSG00000198648|ENSG00000169220|ENSG00000185920|ENSG00000136244|ENSG00000124212|ENSG00000163273|ENSG00000113749|ENSG00000124789|ENSG00000115594|ENSG00000144231|ENSG00000132436|ENSG00000153201|ENSG00000058668|ENSG00000196365|ENSG00000198771|ENSG00000099864|ENSG00000107159|ENSG00000050748|ENSG00000135945
establishment of protein localization to organelle	Gene Ontology	GO:0072594	16	652	0.00133352	0.0283634	ENSG00000107175|ENSG00000233927|ENSG00000115268|ENSG00000204764|ENSG00000153201|ENSG00000142655|ENSG00000115266|ENSG00000171596|ENSG00000135960|ENSG00000148950|ENSG00000136244|ENSG00000137642|ENSG00000050748|ENSG00000088888|ENSG00000162928|ENSG00000181104
negative regulation of nitrogen compound metabolic process	Gene Ontology	GO:0051172	28	1476	0.00136185	0.0288406	ENSG00000198914|ENSG00000160049|ENSG00000185920|ENSG00000106443|ENSG00000165671|ENSG00000142655|ENSG00000136715|ENSG00000137642|ENSG00000073614|ENSG00000178175|ENSG00000091831|ENSG00000147889|ENSG00000162924|ENSG00000070366|ENSG00000134046|ENSG00000204120|ENSG00000100813|ENSG00000172216|ENSG00000135930|ENSG00000124212|ENSG00000164532|ENSG00000163273|ENSG00000196781|ENSG00000215271|ENSG00000058668…
multicellular organismal process	Gene Ontology	GO:0032501	92	6820	0.00140043	0.0295297	ENSG00000092067|ENSG00000185920|ENSG00000163092|ENSG00000163558|ENSG00000137642|ENSG00000095585|ENSG00000095587|ENSG00000164220|ENSG00000091831|ENSG00000154127|ENSG00000204120|ENSG00000137076|ENSG00000161203|ENSG00000107140|ENSG00000124212|ENSG00000253293|ENSG00000164532|ENSG00000163273|ENSG00000101224|ENSG00000105676|ENSG00000145708|ENSG00000204634|ENSG00000132437|ENSG00000132436|ENSG00000151208…
multicellular organism reproduction	Gene Ontology	GO:0032504	18	785	0.00142671	0.0299548	ENSG00000073614|ENSG00000107140|ENSG00000125779|ENSG00000091831|ENSG00000253293|ENSG00000071626|ENSG00000163273|ENSG00000058668|ENSG00000197081|ENSG00000101126|ENSG00000134046|ENSG00000143199|ENSG00000130005|ENSG00000140463|ENSG00000101224|ENSG00000124212|ENSG00000172216|ENSG00000115594
positive regulation of gene expression	Gene Ontology	GO:0010628	30	1630	0.0014542	0.0304015	ENSG00000092067|ENSG00000107175|ENSG00000165671|ENSG00000185920|ENSG00000198914|ENSG00000073614|ENSG00000006468|ENSG00000161021|ENSG00000091831|ENSG00000144231|ENSG00000127445|ENSG00000162924|ENSG00000071626|ENSG00000161202|ENSG00000136244|ENSG00000172216|ENSG00000253293|ENSG00000164532|ENSG00000029153|ENSG00000196781|ENSG00000147883|ENSG00000088888|ENSG00000181104|ENSG00000188786|ENSG00000161011…
anatomical structure development	Gene Ontology	GO:0048856	75	5323	0.00150465	0.0313223	ENSG00000092067|ENSG00000058668|ENSG00000072163|ENSG00000157827|ENSG00000185920|ENSG00000196781|ENSG00000120451|ENSG00000105676|ENSG00000171540|ENSG00000125779|ENSG00000113163|ENSG00000198914|ENSG00000163558|ENSG00000137642|ENSG00000095585|ENSG00000073614|ENSG00000095587|ENSG00000070610|ENSG00000161021|ENSG00000091831|ENSG00000127445|ENSG00000169220|ENSG00000141753|ENSG00000154127|ENSG00000115266…
positive regulation of biosynthetic process	Gene Ontology	GO:0009891	31	1712	0.00155654	0.0322653	ENSG00000092067|ENSG00000107175|ENSG00000198914|ENSG00000185920|ENSG00000165671|ENSG00000073614|ENSG00000006468|ENSG00000161021|ENSG00000091831|ENSG00000144231|ENSG00000127445|ENSG00000140443|ENSG00000161202|ENSG00000136244|ENSG00000172216|ENSG00000163273|ENSG00000253293|ENSG00000164532|ENSG00000029153|ENSG00000147883|ENSG00000112186|ENSG00000088888|ENSG00000181104|ENSG00000188786|ENSG00000161011…
cellular carbohydrate metabolic process	Gene Ontology	GO:0044262	9	256	0.00156719	0.032349	ENSG00000130766|ENSG00000153201|ENSG00000141753|ENSG00000111713|ENSG00000106070|ENSG00000142657|ENSG00000169764|ENSG00000136244|ENSG00000235194
regulation of peptidyl-serine phosphorylation	Gene Ontology	GO:0033135	6	117	0.00158693	0.0326187	ENSG00000115896|ENSG00000058668|ENSG00000165671|ENSG00000071051|ENSG00000136244|ENSG00000127914
amide binding	Gene Ontology	GO:0033218	9	257	0.00160812	0.0329159	ENSG00000161021|ENSG00000101126|ENSG00000140443|ENSG00000124789|ENSG00000161203|ENSG00000213316|ENSG00000137642|ENSG00000145708|ENSG00000113163
RNA biosynthetic process	Gene Ontology	GO:0032774	57	3795	0.00163188	0.0332632	ENSG00000092067|ENSG00000107175|ENSG00000233927|ENSG00000058668|ENSG00000198914|ENSG00000185920|ENSG00000171540|ENSG00000152382|ENSG00000165671|ENSG00000142655|ENSG00000163558|ENSG00000136715|ENSG00000073614|ENSG00000006468|ENSG00000114933|ENSG00000161021|ENSG00000091831|ENSG00000144231|ENSG00000127445|ENSG00000169220|ENSG00000147889|ENSG00000141425|ENSG00000134046|ENSG00000135966|ENSG00000164532…
response to organic substance	Gene Ontology	GO:0010033	45	2813	0.00168331	0.0341692	ENSG00000092067|ENSG00000107175|ENSG00000101126|ENSG00000130766|ENSG00000136244|ENSG00000185920|ENSG00000088888|ENSG00000197081|ENSG00000163558|ENSG00000178175|ENSG00000091831|ENSG00000143158|ENSG00000127445|ENSG00000162924|ENSG00000145708|ENSG00000140443|ENSG00000140463|ENSG00000010932|ENSG00000137076|ENSG00000213316|ENSG00000172216|ENSG00000127914|ENSG00000124212|ENSG00000163273|ENSG00000115602…
protein kinase binding	Gene Ontology	GO:0019901	14	543	0.00169507	0.0342656	ENSG00000050748|ENSG00000161021|ENSG00000198648|ENSG00000127445|ENSG00000169220|ENSG00000147889|ENSG00000161011|ENSG00000122188|ENSG00000147883|ENSG00000101224|ENSG00000163888|ENSG00000160633|ENSG00000095585|ENSG00000088888
positive regulation of cell death	Gene Ontology	GO:0010942	15	608	0.00178079	0.0358503	ENSG00000188215|ENSG00000124212|ENSG00000160049|ENSG00000127445|ENSG00000147889|ENSG00000161011|ENSG00000197081|ENSG00000006747|ENSG00000071051|ENSG00000143199|ENSG00000100813|ENSG00000163558|ENSG00000136244|ENSG00000050748|ENSG00000181104
ribonucleoprotein complex export from nucleus	Gene Ontology	GO:0071426	6	120	0.00179391	0.0359665	ENSG00000233927|ENSG00000115268|ENSG00000153201|ENSG00000070366|ENSG00000124789|ENSG00000144231
response to interleukin-1	Gene Ontology	GO:0070555	6	121	0.00186726	0.0372843	ENSG00000124212|ENSG00000163558|ENSG00000136244|ENSG00000172216|ENSG00000050748|ENSG00000115594
protein localization to organelle	Gene Ontology	GO:0033365	19	874	0.00191962	0.038174	ENSG00000107175|ENSG00000233927|ENSG00000115268|ENSG00000091831|ENSG00000204764|ENSG00000153201|ENSG00000127445|ENSG00000142655|ENSG00000115266|ENSG00000171596|ENSG00000135960|ENSG00000140463|ENSG00000148950|ENSG00000136244|ENSG00000137642|ENSG00000050748|ENSG00000088888|ENSG00000162928|ENSG00000181104
multi-organism process	Gene Ontology	GO:0051704	39	2354	0.00193194	0.0382633	ENSG00000092067|ENSG00000107175|ENSG00000233927|ENSG00000065534|ENSG00000010932|ENSG00000088888|ENSG00000197081|ENSG00000174004|ENSG00000073614|ENSG00000115268|ENSG00000091831|ENSG00000144231|ENSG00000145708|ENSG00000115594|ENSG00000071626|ENSG00000143199|ENSG00000140463|ENSG00000100813|ENSG00000137076|ENSG00000161203|ENSG00000136244|ENSG00000172216|ENSG00000161204|ENSG00000107140|ENSG00000125779…
gland morphogenesis	Gene Ontology	GO:0022612	6	122	0.00194286	0.0383245	ENSG00000091831|ENSG00000072163|ENSG00000185920|ENSG00000135960|ENSG00000136244|ENSG00000172216
I-kappaB kinase/NF-kappaB signaling	Gene Ontology	GO:0007249	9	265	0.00196731	0.0386509	ENSG00000091831|ENSG00000161011|ENSG00000196781|ENSG00000162924|ENSG00000111711|ENSG00000115602|ENSG00000135960|ENSG00000088888|ENSG00000181104
carbohydrate metabolic process	Gene Ontology	GO:0005975	17	744	0.00199326	0.0390042	ENSG00000111713|ENSG00000214160|ENSG00000004864|ENSG00000130766|ENSG00000153201|ENSG00000141429|ENSG00000161013|ENSG00000141753|ENSG00000101126|ENSG00000000419|ENSG00000106070|ENSG00000142657|ENSG00000136731|ENSG00000169764|ENSG00000136244|ENSG00000131459|ENSG00000235194
monosaccharide binding	Gene Ontology	GO:0048029	4	49	0.00201632	0.0392283	ENSG00000000419|ENSG00000111713|ENSG00000197081|ENSG00000169764
ribonucleoprotein complex localization	Gene Ontology	GO:0071166	6	123	0.00202075	0.0392283	ENSG00000233927|ENSG00000115268|ENSG00000153201|ENSG00000070366|ENSG00000124789|ENSG00000144231
regulation of metallopeptidase activity	Gene Ontology	GO:1905048	2	5	0.00206234	0.0394101	ENSG00000122707|ENSG00000137642
nuclear pore nuclear basket	Gene Ontology	GO:0044615	2	5	0.00206234	0.0394101	ENSG00000124789|ENSG00000153201
regulation of metalloendopeptidase activity	Gene Ontology	GO:1904683	2	5	0.00206234	0.0394101	ENSG00000122707|ENSG00000137642
thrombin receptor activity	Gene Ontology	GO:0015057	2	5	0.00206234	0.0394101	ENSG00000164220|ENSG00000181104
reactive oxygen species biosynthetic process	Gene Ontology	GO:1903409	5	84	0.00210176	0.0398519	ENSG00000124212|ENSG00000136244|ENSG00000058668|ENSG00000091831|ENSG00000050748
beta-catenin binding	Gene Ontology	GO:0008013	5	84	0.00210176	0.0398519	ENSG00000161202|ENSG00000151208|ENSG00000091831|ENSG00000115266|ENSG00000127445
lipid binding	Gene Ontology	GO:0008289	15	621	0.00217041	0.0407715	ENSG00000176783|ENSG00000091831|ENSG00000198722|ENSG00000139144|ENSG00000185920|ENSG00000197081|ENSG00000120451|ENSG00000174448|ENSG00000006747|ENSG00000113163|ENSG00000145703|ENSG00000163558|ENSG00000161203|ENSG00000213316|ENSG00000157107
animal organ development	Gene Ontology	GO:0048513	48	3095	0.00217335	0.0407715	ENSG00000092067|ENSG00000065534|ENSG00000072163|ENSG00000185920|ENSG00000197081|ENSG00000120451|ENSG00000105676|ENSG00000171540|ENSG00000113163|ENSG00000198914|ENSG00000163558|ENSG00000095585|ENSG00000073614|ENSG00000095587|ENSG00000161021|ENSG00000091831|ENSG00000127445|ENSG00000154127|ENSG00000071626|ENSG00000204120|ENSG00000140463|ENSG00000006468|ENSG00000164532|ENSG00000161202|ENSG00000161203…
protein import	Gene Ontology	GO:0017038	10	323	0.00217575	0.0407715	ENSG00000107175|ENSG00000204764|ENSG00000153201|ENSG00000115266|ENSG00000135960|ENSG00000142655|ENSG00000136244|ENSG00000088888|ENSG00000162928|ENSG00000181104
nucleotidyltransferase activity	Gene Ontology	GO:0016779	6	125	0.00218359	0.0407715	ENSG00000115421|ENSG00000107447|ENSG00000169764|ENSG00000122008|ENSG00000135945|ENSG00000144231
receptor signaling complex scaffold activity	Gene Ontology	GO:0030159	3	23	0.00222741	0.0409719	ENSG00000169220|ENSG00000071051|ENSG00000151208
cellular response to osmotic stress	Gene Ontology	GO:0071470	3	23	0.00222741	0.0409719	ENSG00000065534|ENSG00000198648|ENSG00000198771
G-protein alpha-subunit binding	Gene Ontology	GO:0001965	3	23	0.00222741	0.0409719	ENSG00000169220|ENSG00000197081|ENSG00000181104
negative regulation of cell death	Gene Ontology	GO:0060548	19	886	0.00222783	0.0409719	ENSG00000072163|ENSG00000107175|ENSG00000172216|ENSG00000091831|ENSG00000160049|ENSG00000127445|ENSG00000161011|ENSG00000101126|ENSG00000196781|ENSG00000140443|ENSG00000162924|ENSG00000132436|ENSG00000198914|ENSG00000146066|ENSG00000163558|ENSG00000107731|ENSG00000136244|ENSG00000137642|ENSG00000181104
organonitrogen compound metabolic process	Gene Ontology	GO:1901564	36	2139	0.00225207	0.0412626	ENSG00000143199|ENSG00000233927|ENSG00000058668|ENSG00000122254|ENSG00000010932|ENSG00000142657|ENSG00000137642|ENSG00000115268|ENSG00000091831|ENSG00000143158|ENSG00000023228|ENSG00000070610|ENSG00000164919|ENSG00000204120|ENSG00000148950|ENSG00000136244|ENSG00000135930|ENSG00000125779|ENSG00000124212|ENSG00000158417|ENSG00000166123|ENSG00000163273|ENSG00000135972|ENSG00000115286|ENSG00000130005…
muscle contraction	Gene Ontology	GO:0006936	10	325	0.00227205	0.0414735	ENSG00000152413|ENSG00000065534|ENSG00000164532|ENSG00000171596|ENSG00000198771|ENSG00000198467|ENSG00000130005|ENSG00000113163|ENSG00000137076|ENSG00000181104
RNA processing	Gene Ontology	GO:0006396	19	889	0.00231109	0.0415783	ENSG00000115421|ENSG00000144535|ENSG00000179335|ENSG00000196504|ENSG00000091831|ENSG00000144231|ENSG00000071626|ENSG00000105671|ENSG00000100813|ENSG00000135972|ENSG00000233927|ENSG00000126698|ENSG00000183431|ENSG00000115268|ENSG00000162927|ENSG00000064607|ENSG00000169045|ENSG00000160633|ENSG00000066654
positive regulation of chemokine production	Gene Ontology	GO:0032722	4	51	0.00231179	0.0415783	ENSG00000136244|ENSG00000050748|ENSG00000088888|ENSG00000115602
glucan biosynthetic process	Gene Ontology	GO:0009250	4	51	0.00231179	0.0415783	ENSG00000111713|ENSG00000169764|ENSG00000106070|ENSG00000235194
glycogen biosynthetic process	Gene Ontology	GO:0005978	4	51	0.00231179	0.0415783	ENSG00000111713|ENSG00000169764|ENSG00000106070|ENSG00000235194
receptor binding	Gene Ontology	GO:0005102	27	1461	0.00237961	0.0426413	ENSG00000107175|ENSG00000185920|ENSG00000165671|ENSG00000142655|ENSG00000095585|ENSG00000241563|ENSG00000178175|ENSG00000091831|ENSG00000115896|ENSG00000141753|ENSG00000127022|ENSG00000122584|ENSG00000140443|ENSG00000161202|ENSG00000161203|ENSG00000136244|ENSG00000172216|ENSG00000127914|ENSG00000163273|ENSG00000137076|ENSG00000115594|ENSG00000181104|ENSG00000152413|ENSG00000106070|ENSG00000161011…
regulation of carbohydrate metabolic process	Gene Ontology	GO:0006109	7	173	0.00242547	0.0433044	ENSG00000130766|ENSG00000153201|ENSG00000141753|ENSG00000101126|ENSG00000106070|ENSG00000136244|ENSG00000235194
negative regulation of protein serine/threonine kinase activity	Gene Ontology	GO:0071901	6	128	0.00244617	0.0435151	ENSG00000147883|ENSG00000169220|ENSG00000147889|ENSG00000276023|ENSG00000122188|ENSG00000137642
monosaccharide biosynthetic process	Gene Ontology	GO:0046364	5	88	0.00254742	0.0449891	ENSG00000136244|ENSG00000004864|ENSG00000142657|ENSG00000153201|ENSG00000130766
regulation of carbohydrate biosynthetic process	Gene Ontology	GO:0043255	5	88	0.00254742	0.0449891	ENSG00000153201|ENSG00000136244|ENSG00000106070|ENSG00000130766|ENSG00000235194
positive regulation of macromolecule biosynthetic process	Gene Ontology	GO:0010557	28	1544	0.00257774	0.0452382	ENSG00000092067|ENSG00000107175|ENSG00000165671|ENSG00000185920|ENSG00000198914|ENSG00000073614|ENSG00000006468|ENSG00000161021|ENSG00000091831|ENSG00000144231|ENSG00000127445|ENSG00000140443|ENSG00000161202|ENSG00000136244|ENSG00000172216|ENSG00000253293|ENSG00000164532|ENSG00000029153|ENSG00000147883|ENSG00000088888|ENSG00000181104|ENSG00000188786|ENSG00000161011|ENSG00000162924|ENSG00000143164…
binding, bridging	Gene Ontology	GO:0060090	7	175	0.00258002	0.0452382	ENSG00000152413|ENSG00000095585|ENSG00000071051|ENSG00000106070|ENSG00000161202|ENSG00000161203|ENSG00000164692
system development	Gene Ontology	GO:0048731	61	4215	0.00260854	0.0455417	ENSG00000092067|ENSG00000058668|ENSG00000072163|ENSG00000185920|ENSG00000197081|ENSG00000120451|ENSG00000105676|ENSG00000171540|ENSG00000065534|ENSG00000113163|ENSG00000198914|ENSG00000163558|ENSG00000137642|ENSG00000095585|ENSG00000073614|ENSG00000095587|ENSG00000070610|ENSG00000161021|ENSG00000091831|ENSG00000127445|ENSG00000169220|ENSG00000141753|ENSG00000154127|ENSG00000099864|ENSG00000071626…
regulation of RNA biosynthetic process	Gene Ontology	GO:2001141	53	3539	0.00261661	0.0455417	ENSG00000092067|ENSG00000107175|ENSG00000058668|ENSG00000198914|ENSG00000185920|ENSG00000171540|ENSG00000152382|ENSG00000165671|ENSG00000142655|ENSG00000163558|ENSG00000136715|ENSG00000073614|ENSG00000006468|ENSG00000114933|ENSG00000161021|ENSG00000091831|ENSG00000144231|ENSG00000127445|ENSG00000169220|ENSG00000147889|ENSG00000141425|ENSG00000134046|ENSG00000164532|ENSG00000161202|ENSG00000135966…
macromolecular complex assembly	Gene Ontology	GO:0065003	29	1621	0.00262526	0.0455417	ENSG00000142655|ENSG00000137642|ENSG00000157107|ENSG00000115268|ENSG00000198722|ENSG00000183431|ENSG00000023228|ENSG00000134046|ENSG00000140443|ENSG00000140463|ENSG00000148950|ENSG00000127914|ENSG00000171530|ENSG00000164532|ENSG00000196781|ENSG00000115286|ENSG00000006747|ENSG00000124789|ENSG00000145703|ENSG00000144231|ENSG00000179151|ENSG00000050748|ENSG00000161011|ENSG00000196365|ENSG00000151208…
maintenance of protein location in cell	Gene Ontology	GO:0032507	5	89	0.00266877	0.0461329	ENSG00000137076|ENSG00000006747|ENSG00000137642|ENSG00000140463|ENSG00000107175
poly(A) RNA binding	Gene Ontology	GO:0044822	23	1182	0.00268216	0.0462011	ENSG00000233927|ENSG00000105671|ENSG00000100813|ENSG00000134046|ENSG00000179335|ENSG00000115268|ENSG00000183431|ENSG00000147889|ENSG00000071626|ENSG00000204120|ENSG00000135972|ENSG00000171530|ENSG00000135930|ENSG00000196504|ENSG00000158417|ENSG00000169045|ENSG00000179151|ENSG00000276023|ENSG00000127022|ENSG00000170004|ENSG00000064607|ENSG00000160633|ENSG00000066654
[truncated: 4,417 more rows]

## Sheet: table S9
Table S6 The Results of KEGG Enrichment Analyses
[truncated: 193 more rows]

## Sheet: table S10
Table S10 QTLs Overlapped with Candidate Selected Regions
[truncated: 3,004 more rows]
